# Supplementary material for: Low-coverage whole genome sequencing of diverse Dioscorea bulbifera accessions for plastome resource development, polymorphic nuclear SSR identification, and phylogenetic analyses
Source: Front Plant Sci. 2024 Mar 6;15:1373297. doi: 10.3389/fpls.2024.1373297 (PMC10950973; doi:10.3389/fpls.2024.1373297)
Supplement: Supplementary file 2 [file Table_2.xlsx]

## Sheet: Sheet1
Table S2 The lengths and motif types of plastome-derived SSRs in the 10 Dioscore bulbifera accessions
Type	A/T									C/G			AA/TT					AG/CT	AT/AT					CC/GG		AAA/TTT			AAG/CTT	AAT/ATT		CCC/GGG	AAAA/TTTT		AAAT/ATTT	AATG/ATTC	AGAT/ATCT	ATAT/ATAT		CCCC/GGGG	AAAAA/TTTTT	AAGAC/CTTGT	AATAT/ATATT	AAAAAA/TTTTTT	ATATAT/ATATAT
Length	10	11	12	13	14	15	16	17	18	10	11	12	5	6	7	8	9	5	5	6	7	8	9	5	6	4	5	6	4	4	5	4	3	4	3	3	3	3	4	3	3	3	4	3	3
AHLA	26	9	7			1		1	1			1	35	7	1	1	1	3	10	1	1		1		1	7	2	1	4	1	2	1	8	2	2	1	1	2	1	1	3	1	1	1	1
FJNJ	27	10	5	1	1	1	1		1	1			37	6	2	1	1	3	10	1	2			1		7	2	1	4	1	2	0	8	2	2	1	1	3		0	3	1	1	1
GDSG	28	10	5	1	1	1	1		1		1		38	6	2	1	1	3	10	1	2			1		7	2	1	4	1	2	0	8	2	2	1	1	3		0	3	1	1	1
GXQZ	27	10	5	1	1	1	1		1	1			37	6	2	1	1	3	10	1	2			1		7	2	1	4	1	2	0	8	2	2	1	1	3		0	3	1	1	1
HeNSX	27	10	8					1	1	1			38	7		1	1	3	10	2	1	1		1		8	1	1	4	1	2	0	7	2	2	1	1	3	1	0	2	1	1	1
HuNXX	32	8	7	1	1			1	1			1	41	7	1	1	1	3	9	2	1	1			1	9	1	1	4	1	2	1	8	2	2	1	1	3	1	1	2	1	1	1
JSYX	26	9	7			1		1	1			1	35	7	1	1	1	3	10	1	1		1		1	7	2	1	4	1	2	1	8	2	2	1	1	2	1	1	3	1	1	1	1
SCEM	32	8	7	1	1			1	1			1	41	7	1	1	1	3	9	2	1	1			1	9	1	1	4	1	2	1	8	2	2	1	1	3	1	1	2	1	1	1
TWXB	27	10	5	1	1	1	1		1	1			37	6	2	1	1	3	10	1	2			1		7	2	1	4	1	2	0	8	2	2	1	1	3		0	3	1	1	1
ZJLS	26	9	7			1		1	1			1	35	7	1	1	1	3	10	1	1		1		1	7	2	1	4	1	2	1	8	2	2	1	1	2	1	1	3	1	1	1	1
