# Supplementary material for: Low-coverage whole genome sequencing of diverse Dioscorea bulbifera accessions for plastome resource development, polymorphic nuclear SSR identification, and phylogenetic analyses
Source: Front Plant Sci. 2024 Mar 6;15:1373297. doi: 10.3389/fpls.2024.1373297 (PMC10950973; doi:10.3389/fpls.2024.1373297)
Supplement: Supplementary file 3 [file Table_3.xlsx]

## Sheet: Sheet1
Table S3 Polymorphic nuclear SSRs for Dioscorea bulbifera
SSRID	Type	AHLA	SCEM	TWXB	Std_dev	MissingRate	Transferability (Similarity)	Upstream_200bp	Downstream_200bp	Forward primer1 (5'->3')	Tm (centigrade)	Size (bp)	Average identity (%)	Average coverage (%)	Reverse primer1 (5'->3')	Tm (centigrade)	Size (bp)	Average identity (%)	Average coverage (%)	Product1 size (bp)	Start	End	Forward primer2 (5'->3')	Tm (centigrade)	Size (bp)	Average identity (%)	Average coverage (%)	Reverse primer2 (5'->3')	Tm (centigrade)	Size (bp)	Average identity (%)	Average coverage (%)	Product2 size (bp)	Start	End	Forward primer3 (5'->3')	Tm (centigrade)	Size (bp)	Average identity (%)	Average coverage (%)	Reverse primer3 (5'->3')	Tm (centigrade)	Size (bp)	Average identity (%)	Average coverage (%)	Product3 size (bp)	Start	End
PolynSSR_1	AAAAAC	3|AHLA_contig_9888:305-722|+	4|SCEM_1.clean_(paired)_contig_132382:1368-1391|+	3|TWXB_1.clean_(paired)_contig_4059:4497-4514|+	0.47	0	1	TAATTTTCACTTAGTAAAGATGATAGATACCAGTGAAGTTTCGTTTTTTAGGATATTTTATGCTCTGTGAGCCCAAATTTTGCATTATGAGTCGAGATTAAGAAGCTGTTTGTACTAATTAGAAACAACTTATAATCTAAAACATTCATCCAATTGATTTGAATTTACAATTTGGAGCATCATACCATGCTTGGGAATGG	AAAAAAAGAAGTTTCATAATGAACATTTGCGTCAAATCATTACAAATATGCAGCAAAAATTTGATTCCATTTATCAGGAACTCCGGGCAAGCACCAATGGATGCAATCAACAAACCGCCGCAGGTTCGCTTTCTTCTCCTCTAGCGGTATCTCTCCACCTCTGTGGATCGATACATGACCATCGATACGATACTCCGATA	CAATTTGGAGCATCATACCATG	55.809	22	100	100	TTGCATCCATTGGTGCTTGC	60.037	20	100	100	157	367	523	CAATTTGGAGCATCATACCATG	55.809	22	100	100	CGGCGGTTTGTTGATTGCAT	60.388	20	100	100	171	367	537	CAATTTGGAGCATCATACCATG	55.809	22	100	100	CTTGCCCGGAGTTCCTGATA	59.169	20	100	100	142	367	508
PolynSSR_2	AAAAAG	3|AHLA_contig_37173:329-746|+	2|SCEM_1.clean_(paired)_contig_23456:1889-1900|+	N/A	0.5	0.33	0.97	TTACGACCCACCGTGAGTTTGCGTTACAATAATATATTCTGTACATATACTCCTTATTGTATTTATTGTTTATATATACTTTTGTACACCTTGTTTCTCTTTATTGGGCCATTGCCCTAATCTAACTCACGCTCCTTCCTTCAATATCCCACAATAACAATCTAAGCAATCTCCATTGGTGGTGCTTCTTCAGGTTAAAA	AAAAATGTTATGAAAGCAACAATTAATAGACAAATGGTGGGTAACATCAGGTGCCCGGTAAATAATATTGACAGTATTAATATAAACAGCGTTGCCCTCAGGTACTCCTTGATGAAGTTGGCTTGGGAAGCAATATAACCAACTGATAAGTCTGGGCCACTGTCTCAGCACAAGTCTGTCCCAATCTTCAGGTGATGATC	ACTCACGCTCCTTCCTTCAA	58.951	20	100	100	GCACCTGATGTTACCCACCA	59.962	20	100	95	148	324	471	AACTCACGCTCCTTCCTTCA	58.951	20	100	100	GCACCTGATGTTACCCACCA	59.962	20	100	95	149	323	471	TCTCCATTGGTGGTGCTTCT	58.933	20	100	100	GCACCTGATGTTACCCACCA	59.962	20	100	95	103	369	471
PolynSSR_3	AAAAAG	3|AHLA_contig_88245:2446-2863|+	2|SCEM_1.clean_(paired)_contig_13785:4365-4376|+	3|TWXB_1.clean_(paired)_contig_100041:3105-3122|-	0.47	0	0.98	AACCAAACATAAAAATTTCAAATTAGCAATAGAACATGCAGCAGAAGCAGATGCATGTACAACCACCTCTACAGGTGCATTTTGATCATAGAGAAAAATGAAAATAACAAGAAGGTCAACTATAGTTTCTGGACAGCGCCATCATGGTAATCAACACTTTCCTCAAAAATCACACGTTGATAACACTACTGAAAGGGGAA	TCAAACACTGACCTCAGTGAGGTGACCTTTGATCAACTTAGAAATTTGGGTTGAAAGAAAGACATGTTTCCACATAAACATAATATCAGGTAAAAACATTTCGCTATAATGAAATTGTATCTTCAGGTAAATAAAATAACACGAAATAAATTTTTCTGATTTTTTCTATTCAATCAACATAATTCAAGCTAAAGGTCTTC	TTTCTGGACAGCGCCATCAT	60.035	20	100	100	TGATCAAAGGTCACCTCACTGA	59.028	22	100	100	128	325	452	TTTCTGGACAGCGCCATCAT	60.035	20	100	100	TGATCAAAGGTCACCTCACTGAG	59.993	23	100	100	128	325	452	TTTCTGGACAGCGCCATCAT	60.035	20	100	100	TCAAAGGTCACCTCACTGAG	56.792	20	100	100	125	325	449
PolynSSR_4	AAAAAT	3|AHLA_contig_123438:616-1033|+	2|SCEM_1.clean_(paired)_contig_69328:4500-4511|-	N/A	0.5	0.33	0.96	ATTATCAAGCAATCAATCTTGCCAAAAAATTTGCAAACAAAATTAATTTCAAACATAAAACTTCCCTAACAATATCTTTAAACAAATAAATCATTTTTTTTATAAACTCCCAAATATATCTACATACCAAATGTATCTTAATAAATCAGGACCAATAAGAGCACAAAATACTGCAACAAATATGGCGAAAAATCACCAAA	AGCACCGAAAAAACACACATGAAACATTCATTCTAAAGTCCTCTGTCACATAGCAGAAATCCTACTGATTAAGGCAATGCACATGACACAGGCTAAAATTTTATATAAAACAATGGGCTGTTTGTCTCACAGAGTCACAAGCAGAGTTATGAGCAGAAAAACAATGGGTGGAAAAGCAGTAGATTGAAATCTTATCCTCA	ACTGCAACAAATATGGCGAA	56.318	20	100	70	CCTGTGTCATGTGCATTGCC	60.109	20	100	100	141	369	509	TCAGGACCAATAAGAGCACA	56.159	20	N/A	N/A	CCTGTGTCATGTGCATTGCC	60.109	20	100	100	165	345	509	TCAGGACCAATAAGAGCACAA	56.932	21	N/A	N/A	CCTGTGTCATGTGCATTGCC	60.109	20	100	100	165	345	509
PolynSSR_5	AAAAAT	3|AHLA_contig_124828:68-485|+	2|SCEM_1.clean_(paired)_contig_84118:511-522|+	N/A	0.5	0.33	0.98	TAGTTTTGGTTGGGAATTCTCTAAATTTAGCGGGGCACGAATGTGTTAGTGTTATCTTTTCTATTAAGCTTAATTGTGCATTCACTCTTGCCTTGAAACCTACTTTTAGTTCACTATACCCTTTTTTGTGTGGAGTCTCTTGTGCTTAGGGTGGACATTAGCTTATTGATCATTAATCTTATTTTTGTTCTTTTTGCAAA	ACAACCAATTTAGGAGTTTAAAACCCAAAAAGTTGGACTCGTTGAATGCCTTACTGGTGAGTTATACATAGAGGTTAGGTAAGATGGTAAAAAGATATATCACTTTAGAAGTGTGAAAGCCACTATTGAGTAGTCAGATTCGGGCATCATCCGTGTTCACTTGATAACCTACTAGGGAAATAGCTACCTCTATAAGTATA	TGTGTGGAGTCTCTTGTGCT	58.877	20	100	100	AGGCATTCAACGAGTCCAACT	59.928	21	100	100	143	193	335	CTCTTGTGCTTAGGGTGGACA	59.652	21	100	100	AGGCATTCAACGAGTCCAACT	59.928	21	100	100	133	203	335	TCTTGTGCTTAGGGTGGACA	58.57	20	100	100	AGGCATTCAACGAGTCCAACT	59.928	21	100	100	132	204	335
PolynSSR_6	AAAAAT	3|AHLA_contig_22116:415-832|+	3|SCEM_1.clean_(paired)_contig_22505:4194-4211|+	2|TWXB_1.clean_(paired)_contig_34069:1472-1483|-	0.47	0	0.98	TTTTGGGTATCTTGTTCTAAGCAAGCCGAAAAGCTTTCCTAGTATCGCAAAACCACACACACACACACAACATTGATATATTACCACTCTAGTACTTAATGAGGTCGCATTAGAAAAACAGTAGCATTCACCACTAGAATCTCTCGATTTACAAGAGTTTCTTCATTACAGTGACTAGCAGAAAAAACCAATATTTCAGA	CAGCAAAATGTGTTCTTAAGCTTCTTCACTGTTACCACTCTCTAATTGCTCAATGAAACAACTCAAACCCATTACAGTCCACCAGAAAAAGAAGTCCAAAATGCTCATAATTGCTATTCTCTCGAACATCATAACCTAGAGTCAAGGAAACTATACCCCTTTTGCCACTAGTTAATTTTTTTTTTTTTCGATAAATCACT	GCATTCACCACTAGAATCTCTCG	58.952	23	100	100	TCTGGTGGACTGTAATGGGT	57.961	20	100	100	181	323	503	GCATTCACCACTAGAATCTCTCGA	60.202	24	100	100	TCTGGTGGACTGTAATGGGT	57.961	20	100	100	181	323	503	AGCATTCACCACTAGAATCTCTCG	60.202	24	100	100	TCTGGTGGACTGTAATGGGT	57.961	20	100	100	182	322	503
PolynSSR_7	AAAAAT	3|AHLA_contig_2362:832-1249|+	N/A	2|TWXB_1.clean_(paired)_contig_32843:5118-5129|-	0.5	0.33	0.92	TTGATCAAGGTTCAAACCTAGTTGAGTGTTACAAGCACTAAACTTGAAGATGGAAGCAAAATATATGGTTAGAGACATATTTTGTTTCAGCAATGATTGCTACTTCCCAAGAGTTCTGAGCAGGTACATATGACTGATTGTTCTTTTGGCCCCTTTGTATCAAAGGCGGTTCAATGTAATAAAAATAAAAATACAAATAA	GAAGGGAGACCTATCTCTGCAATCCAATCTCTTTCGGTTCTTACTGGTCTCCCAAGCTGGCTTTTGATGTGATTAATCTTGCAACTGAAGCCCTTACTGTCATACACGTATTGGTCATATAGTTCGCAATCATCCATAGGCATGCATGTGACAAAGCATGGCCTCTGCTTATAGTTTGTATGGCCTTTTGATTGTCTTTC	CCCAAGAGTTCTGAGCAGGT	59.31	20	100	100	TCAAAAGCCAGCTTGGGAGA	59.522	20	100	100	180	305	484	CCCAAGAGTTCTGAGCAGGT	59.31	20	100	100	CAAAAGCCAGCTTGGGAGAC	59.4	20	100	100	179	305	483	GGCCCCTTTGTATCAAAGGC	59.176	20	100	100	TCAAAAGCCAGCTTGGGAGA	59.522	20	100	100	138	347	484
PolynSSR_8	AAAAAT	3|AHLA_contig_33413:3439-3856|+	N/A	4|TWXB_1.clean_(paired)_contig_150175:666-689|+	0.5	0.33	0.99	AATCTATTCTATGTAACTCTTGGCCTTTGTCTGAAACACTAGCATAATAGTGTGTTCAAAATTTAGCTTATTGAGAATGAAAGAAAACTATAGGAAAAACGTCATAGGTTTCGTAAGTGTTACATGAAATTCCCTCAATCAACTATGTAATACAAAAATGTCATGAAAATGTAGGATTGGATAGAGTAGGGTCACAACAA	AAAACTTAAATAAAAATGCACAACTTTTATGGGGAAAACCCCTAATTAAATTAGAGTAAAGACCAAGAGTAAAGATAAGAGAATTCCACTAATTGTGAAAATATATGCATTACAATCTCTCTAATAACAAGGAGAAAACCACTACACACTTATATCAGGCGAAAAATAGTAACTCTTAAAATATTTTTCTTATTCTTTTC	TGGATAGAGTAGGGTCACAACA	57.944	22	100	100	AGTGTGTAGTGGTTTTCTCCTTGT	60.081	24	95.8	100	191	377	567	AGGATTGGATAGAGTAGGGTCACA	60.079	24	100	100	AGTGTGTAGTGGTTTTCTCCTTGT	60.081	24	95.8	100	196	372	567	TGGATAGAGTAGGGTCACAACA	57.944	22	100	100	GTGTGTAGTGGTTTTCTCCTTGT	58.803	23	95.7	100	190	377	566
PolynSSR_9	AAAAAT	3|AHLA_contig_53046:3509-3926|+	2|SCEM_1.clean_(paired)_contig_62899:2109-2120|+	N/A	0.5	0.33	0.99	ACTAATCTATGAACTGCCATCTTCTTCATAAGCAGGAAAAAGGAAGCCTGCTCCAGATTCTTATGCTGAAGTCTTGAAAAGACTTGGTGTAGATCCAGCAAATTGTGTATTCATCGATGATAGGTATCACTTTATATTTTTCTTCTTATCAGGATATGTTGTGTTCAGCATTCATCCTTGTCCTTTTTCACTTAAAACTA	AAAAAACAGAAAAAGAACCACCTCTCCTTTGTCTAATCAATGATCTAGCAAACATATTTATTGACGTTTCTGTGATATCTAGAAAATTTACAGTCCTTAGCTATCGAATTTGATTGATGTCTTTATCTTGCCATTTTCAGAAAAGCCTCAAGAACTCACAAGTTCAGAAAAAAGACTTTTGAAATCGAATCGTAAATCTT	AGACTTGGTGTAGATCCAGCA	58.46	21	100	100	AGACAAAGGAGAGGTGGTTCT	58.304	21	100	100	173	279	451	AGACTTGGTGTAGATCCAGCA	58.46	21	100	100	AGACAAAGGAGAGGTGGTTCTT	58.951	22	100	100	173	279	451	AAGACTTGGTGTAGATCCAGCA	59.094	22	100	100	AGACAAAGGAGAGGTGGTTCT	58.304	21	100	100	174	278	451
PolynSSR_10	AAAAAT	3|AHLA_contig_58899:1373-1790|+	2|SCEM_1.clean_(paired)_contig_24770:601-612|-	N/A	0.5	0.33	0.98	TATTAAATTGGGCTTATATCAAATAATATATTTCAGAAACAGAAAGATTCATCTCAAGAAAATAACCTTTCCAGTCAATATGATAACTCCTATAGAGCTATCATCCCTTGCATCGTCAAATGCACGAATGAGTTCCTTGATTGTTTGTGGCCTAAAAGCATTCCTTCTCTCTGGACGATTTATTGTAATCTGCAAAATTA	CAGCTGATAATGGACAACAGTAGAAACGATAGACCAACAACTCAACAATAAATATATCATAGGTATACACATGCGCTAACATACTCAATTGTTGTTCACAGAGTGCATGTAGCAGCCATTTCTAACATCTTCAGATGTAACTCTAACAGTACATGTAGGAGACATTTGTGACATCTACAGCAAGAAGGCACTTAAAATAA	GCATTCCTTCTCTCTGGACGA	59.521	21	100	100	GCTACATGCACTCTGTGAACA	58.583	21	100	100	174	357	530	GCATTCCTTCTCTCTGGACGA	59.521	21	100	100	ACATGCACTCTGTGAACAACA	58.358	21	100	100	171	357	527	GCATTCCTTCTCTCTGGACGA	59.521	21	100	100	GCTACATGCACTCTGTGAACAA	59.192	22	100	100	174	357	530
PolynSSR_11	AAAAAT	3|AHLA_contig_6534:1523-1940|+	N/A	2|TWXB_1.clean_(paired)_contig_29309:2170-2181|-	0.5	0.33	0.97	TTGATTTTTATGGGTTGTTATTGAAATTTATTGACACAAACAACCTCTTTATCTATTGGTATCAGATCCATGCAATGAAATGATTTTATTTTCATCACTGAAACAAGTTTGAATTTTAAATCACACAAAATGGGATGCAGATGTCTTAGATATTAATTTTATGTATGTGCACACTTTTGATTTCATTGGTGGATTTTGTC	AAATAATTATATTGATCAATTAAAAGCTGATTCATGAAGCATCATGTTGTGGGTGAGGTTTATCAATCAAAAAGCCAATGAGAATCAAGCACATGGTGTATTCTTGCATGTCACTGTTCCCACTTATTGGGAATGTGATTCACTGATTTACTTAGTCATTGATAAGTGCTGAGTTGCCATTGACAAGAAGATCATTTAAC	TCACACAAAATGGGATGCAGA	58.126	21	100	57.14	CCTCACCCACAACATGATGC	59.187	20	100	100	156	320	475	CACACAAAATGGGATGCAGATGT	60.056	23	100	47.83	CCTCACCCACAACATGATGC	59.187	20	100	100	155	321	475	ACACAAAATGGGATGCAGATGT	58.833	22	N/A	N/A	CCTCACCCACAACATGATGC	59.187	20	100	100	154	322	475
PolynSSR_12	AAAAAT	4|AHLA_contig_11517:173-596|+	N/A	2|TWXB_1.clean_(paired)_contig_12855:1614-1625|-	1	0.33	0.97	TTTACTCTTAAATAAAATAATGTTCCTCCTCGGCTGCATGTTTTGACCCTGCCTCTAGTGTGATAATGTGGTATACTTGCATGAGTTCATATTGGGCGGAAAAGAGGTAAAAACCAAAAAGGAACAAATGAGCATGAATTAAATCACGAATAAGAACAGATTATCGAAAAAAGGAGGGGTTTTATCGGGAAAATATCGGA	GAAATTGAGAATAGAAGGCAGGTAGATGAGGAACGGAGTTCAGAGCGGGTGGGAGATGGCGTCATGGTCGCGGCCGCCGCTCCCCGCGCTAGTCCTCGTTGTGCTCTTCTTTCCCTTCTCTGCTTTGTCTTCTATCGATCTCGCAGGCCATGGTAATCCGATGAACCCTAATTTTCTGTTGCTTTAGCATTTGATTTCAT	AGGAGGGGTTTTATCGGGAA	58.025	20	100	100	CGCTCTGAACTCCGTTCCTC	60.457	20	100	100	100	343	442	AGGAGGGGTTTTATCGGGAA	58.025	20	100	100	AGAGCACAACGAGGACTAGC	59.472	20	100	100	160	343	502	TCATATTGGGCGGAAAAGAGGT	59.759	22	100	100	CGCTCTGAACTCCGTTCCTC	60.457	20	100	100	185	258	442
PolynSSR_13	AAAAAT	4|AHLA_contig_156601:647-1070|+	4|SCEM_1.clean_(paired)_contig_164934:318-341|+	3|TWXB_1.clean_(paired)_contig_119569:1977-1994|+	0.47	0	0.97	TAGTATACTCATTCAAGTTCATTTTGAGACATAGACTTTCTTTCATTTAAAATGGTATTCTCAGGAACAAAGTTTGTCTATTTGTTTACTTTTATATTCTTCTACAGTTTACTCACTTTTTGAGAGTGTCATCATTGGTAAGATTGAATAAGTTTGAACGTTTTTTAAATCTATAATCTTTTTATCCAATCTTTTTGTCA	AGCTGTATCCTTTGTAATATGTCTTACTTTTTAATGGCCTAGTTGCCTATAATGTTTGCTCATGTCCCTTATATTGTAATTTACCAAGGAAAAAATGGTAAATTTTGCTTGGTTGGAAGCAAATGTGCACCTTTTTTTTTTTATATCATGTCAAAACACCAACCCAAATGAAATAAACTATATATATATATATATATATA	TTGAGAGTGTCATCATTGGT	54.274	20	97.5	100	AAGGGACATGAGCAAACATT	55.505	20	100	100	175	319	493	TGAGAGTGTCATCATTGGTAAG	55.563	22	100	90.91	GGGACATGAGCAAACATTATAGGC	60.023	24	100	100	172	320	491	GAGAGTGTCATCATTGGTAAGA	55.296	22	100	93.18	GGGACATGAGCAAACATTATAGGC	60.023	24	100	100	171	321	491
PolynSSR_14	AAAAAT	4|AHLA_contig_6728:1032-1455|+	3|SCEM_1.clean_(paired)_contig_125081:375-392|+	N/A	0.5	0.33	0.98	TTAATTATCGATTTGGAGAGAAAAGTAGGAGTTAAAGAGTTTTAAAAAAAAATCATCATTTATGTAATTTTCTAAAAAAAATCATTTCATTATAGAAAATTAAAAGATAACATACTAAAATAAAATTTCCATTAATATTAAAAAATTATAATATTCAACGTAAGCGGTATAACTTTTAATTTGAGACTTTCCAATTAGGA	TGAAACGTGGGGTATCACAGCCCATGGGCCCCTCTCTCTGGCCCAGCAAGGCTAGTAGAATGCCGGCCCAGCCCATTCGACATCTCTATAAATAGTAAATACTATATCTTCAACTGAAGTTAGAAATGGCAAGAGAAATTATTATATGATTCCCATCTCATAGTTTTTAAAAGATTATAATATATACGCACATATTGTTA	TCAACGTAAGCGGTATAACT	54.251	20	100	100	CGGCATTCTACTAGCCTTGC	58.779	20	100	100	135	354	488	TCAACGTAAGCGGTATAACT	54.251	20	100	100	GCCGGCATTCTACTAGCCT	59.251	19	100	100	137	354	490	TCAACGTAAGCGGTATAACT	54.251	20	100	100	CCGGCATTCTACTAGCCTTG	58.129	20	100	100	136	354	489
PolynSSR_15	AAAAAT	5|AHLA_contig_51759:106-535|+	4|SCEM_1.clean_(paired)_contig_66145:572-595|+	N/A	0.5	0.33	0.98	CATTCTAGCGGTGAGGGCGTCCCAGATCAGATGGAGTGCTAGCTTGGATCTTACCTGCTCCAGACGGGGGAAGCTGACAAGCGTCAATCTTTTATCCTTTTGTTCTATCTTATTATTGTTTCATGCATTGTGCACATATAATGGATCTTTTGTATTTATTTTTTTTCGTTTTTAATAAATGTAGTTTATACACATTTTCA	AAAACATTACCTAAATAGCTCTCCAAAATGATGAGTATTTACGTCATCTACTCTTTCTTTCCCGGTGTATGCCCTGTCACCTGTATAACAATCTTAAGAGACATTAGTCACATCATTCCTTTGGGCCATTGTAACATCTCCACTAATCTCTACCACCATGATTGATCTCTTGGTCGATGTCTGGAAGCACAACCTTCTTA	GCATTGTGCACATATAATGG	53.057	20	N/A	N/A	TACAGGTGACAGGGCATACA	58.054	20	100	100	191	229	419	GCATTGTGCACATATAATGG	53.057	20	N/A	N/A	CAGGTGACAGGGCATACAC	57.841	19	100	100	189	229	417	GCATTGTGCACATATAATGG	53.057	20	N/A	N/A	GCATACACCGGGAAAGAAAG	56.795	20	90	100	178	229	406
PolynSSR_16	AAAAC	3|AHLA_contig_100419:3105-3519|+	3|SCEM_1.clean_(paired)_contig_11342:353-367|-	4|TWXB_1.clean_(paired)_contig_179400:703-722|+	0.47	0	0.99	TTTTATTTGGAAGTATAGATGATTTGTAAACCATTTGGGAAACCAATTTGATAAAGTTGTTATTATTATTTTTTTTTTTTTACCGGGCAGTTAGTCAATTCAATGCATTCCAATCATCACTTGATTTCTATGAACTTTGTAGTTGCTGTTTAGCCCCTTGTTTTTAAGCTTATAAAAATAGATAATATTATTAGAAGAGA	AAAATCAAAAACCGAAAATAAAGAATTAAAAAAAATTATCTAAAAAATATCACAAGGAGATACCATTCGTTTTGAATGGAAGAAGATGAGCCGCAAGAAAAAAACGTACCACGTCATGTAATTACCGACATAGTTTTCAAAATGTAATTATTTGTTTTGGAGTCACTATCATTTTTATCTTGTTATGCTACTCCAGGGGT	GCTGTTTAGCCCCTTGTTTT	56.8	20	97.5	100	TTGCGGCTCATCTTCTTCCA	59.675	20	N/A	N/A	167	344	510	GCTGTTTAGCCCCTTGTTTT	56.8	20	97.5	100	TGCGGCTCATCTTCTTCCAT	59.457	20	N/A	N/A	166	344	509	GCTGTTTAGCCCCTTGTTTT	56.8	20	97.5	100	CTTGCGGCTCATCTTCTTCC	58.987	20	N/A	N/A	168	344	511
PolynSSR_17	AAAAC	3|AHLA_contig_107472:38-452|+	N/A	2|TWXB_1.clean_(paired)_contig_47093:403-412|-	0.5	0.33	0.96	GAATCACAACTTCTCCATCTAATACAATTGGTATCCTGTCCTGGAATCTAACCTAAGCCATCACTTCTTTTCTCTTCCTTCTGATTTTTCTAATTCCAATTGGTCAGAGTCTCCTAAAATTCATTCACCACACTAAATTATATTTAAAAATCCATCAACAGATGAACAATCAGGCATATAAATTAAAAAGACAAAGATTA	AGCAGTGAAAAACCTAGTAAGAGCACTAACCACCAAAGCGAGAGACAGCAATCTGCAGAGGAAAATGAAAAACCAAATCAGAGATCTGAAACAGAAGAAGCACAAGAAGAAACACAACAAATTGAAGATGGAAAAGGATTTACAAGGGAAATCAGCCTGGATTGTGCTCATGAGAGGGGCGTGCCAGACATTCCGGTAGC	TCCAATTGGTCAGAGTCTCCT	58.092	21	95.2	100	CTGTCTCTCGCTTTGGTGGT	59.966	20	100	100	169	131	299	TCCAATTGGTCAGAGTCTCCT	58.092	21	95.2	100	TTGCTGTCTCTCGCTTTGGT	59.893	20	100	100	172	131	302	TCCAATTGGTCAGAGTCTCCT	58.092	21	95.2	100	TCGCTTTGGTGGTTAGTGCT	59.892	20	100	100	162	131	292
PolynSSR_18	AAAAC	3|AHLA_contig_109247:3955-4369|+	3|SCEM_1.clean_(paired)_contig_17887:4171-4185|+	2|TWXB_1.clean_(paired)_contig_40298:4488-4497|-	0.47	0	0.98	CTTGTCAATGAATGCGATAATCAAAATAGTTGCACATGAAATAATCTTTTACACACTGCAGGTGGTGCATGCACAAGCGCACACATAAAAAAAGAAAAAAATAAATAAAAGGAGAATGAAACCTAGATAAATCAAAGTAAATAGATCAGACAAGCCCAAGTTTTTTTATAAAAAAAAGGAACACAAGTCCGAGTTTTCAA	AAAAAGGGCATAAATAAATACAAGTGGGAATGCCTATAGACCATTGAGAGGAGAGAACCAACAAGCATGGTTGCAACCACCAGTGGCACATTGGAGTCAAAATGTAGCATATTTCTCAATAAGGTAATGTTCTTCACCAGATATTTTGATGGCAGAAGAATGCTAAAGTAAGATTAGTAGAAAGAATATGAGCAAACCTT	GGAACACAAGTCCGAGTTTTCA	59.06	22	97.5	95.45	TGACTCCAATGTGCCACTGG	60.251	20	100	100	137	377	513	GGAACACAAGTCCGAGTTTTCA	59.06	22	97.5	95.45	GACTCCAATGTGCCACTGGT	60.251	20	100	100	136	377	512	CATGCACAAGCGCACACATA	59.831	20	100	100	TGGTCTATAGGCATTCCCACT	57.94	21	100	97.62	191	267	457
PolynSSR_19	AAAAC	3|AHLA_contig_11708:795-1209|+	2|SCEM_1.clean_(paired)_contig_31066:10257-10266|-	N/A	0.5	0.33	0.98	TAACGGTGTCATACAAAATTTATATCCATTATACTCAGCAAAGTCAAACATGCAGACAAATATCTAAAATCTTTGTCAAAATATAAAGATATAGATGAAGTAATGGTACTCATCCACTCTGAAGGGATTCTTGTGAACCCAGATCACTAGTTAACAACCTCTTGAAGAAAAACCTGGTCTTATGGCGTTTATTTAAAAAT	TTCAAATGTGTAGTAGAGCGAAAGAAGAGGGTCATACTTCACCATTAGAACTGCACAATGCATCCCCTCAAAATCTTGATCAGCAATCTCTCTACTGCAAAATAGTTTCAGTAAACCCCACAAAGTCTAACAAGTCTTCTGCGAATAGGATGCCAAGTAAGAAGCAGCTGAAAAGATACCTGTAAACCATAGCAGGTATG	AGGGATTCTTGTGAACCCAGA	58.652	21	100	100	TTTGAGGGGATGCATTGTGC	59.103	20	100	100	165	322	486	GGTACTCATCCACTCTGAAGGG	59.567	22	100	100	TTTGAGGGGATGCATTGTGC	59.103	20	100	100	183	304	486	TGAAGGGATTCTTGTGAACCCA	59.555	22	100	100	TTTGAGGGGATGCATTGTGC	59.103	20	100	100	168	319	486
PolynSSR_20	AAAAC	3|AHLA_contig_131284:2238-2652|+	N/A	4|TWXB_1.clean_(paired)_contig_146853:1376-1395|-	0.5	0.33	1	CTTACTAACTTAGGTGTTAAATATGTCTCCTGCCCCAGTCATTTAGTGAATTTACAAATTTTATTAAGTAAAATGGTGCTTTGTTCAACTAAACAAATCTAATTCACACAACTGGCAGGTAAGAAAATGCTACTGGAATATTATGCACTTCAAATTACAGGTGCTGTACAGTTTTACAAACCACATTCTCGCCACAATAA	AAAATTTTGATTCAGCCAATCTACAAGCTAAACCATTCTTGCTGGTCTAGCAACATTTCTTTCAAAAAATAAGTGATCCATTCATCTCCGTGCGCTCCATGTTAAATGTTCCTCTACTTAATAAAAGAAAAGTTTGTTGAAAAAAAATGTGTGGCTTGATTGTATCCTGATTAATAAAATAGCAAGCAAATATTGCATAT	CAAACCACATTCTCGCCACA	59.049	20	100	100	TTTAACATGGAGCGCACGGA	60.321	20	100	100	145	376	520	CAAACCACATTCTCGCCACAA	59.664	21	100	100	TTTAACATGGAGCGCACGGA	60.321	20	100	100	145	376	520	CAAACCACATTCTCGCCACA	59.049	20	100	100	GCGCACGGAGATGAATGGAT	60.882	20	100	100	134	376	509
PolynSSR_21	AAAAC	3|AHLA_contig_64290:238-652|+	N/A	2|TWXB_1.clean_(paired)_contig_21456:5523-5532|-	0.5	0.33	0.98	GCTTGTGAAGCAGTGCTTGAAATTGGCAATGCTGGTAACCTATATATTGATGAGAGAGCTCCATGGTCTCTTTTCAAGCAAGGTGTCACTAGTTCCGAATCGGCTGCCAAGGTATATATATTTATCCCATGAAACTAAATAAAAAATGTGATCGATGTTGTTGTCCTTGCTTAATGTTCTGGACTAATTGCAAAGAAAAT	ATGCAGGATCTTGTGGTTATACTTGAAGCAATGAGAATCATAGCCATTGCATTATCTCCAGTTGCTCCCAGCCTTTGTCTGAGAATATATAAACAACTTGGGTTTACTGAGGATGAATTTAAAGCAGTCACTTGGGTATGTGTTCTTCTCAGTTTAGCTGAGGAATTTGATGCTAATTTTGCGCAAATAAATTTGTGATT	CGAATCGGCTGCCAAGGTAT	60.533	20	94.7	95	GACAAAGGCTGGGAGCAACT	60.538	20	100	100	199	295	493	CGAATCGGCTGCCAAGGTAT	60.533	20	94.7	95	AGACAAAGGCTGGGAGCAAC	60.538	20	100	100	200	295	494	CGAATCGGCTGCCAAGGTAT	60.533	20	94.7	95	ACAAAGGCTGGGAGCAACTG	60.825	20	100	100	198	295	492
PolynSSR_22	AAAAC	3|AHLA_contig_89398:1199-1613|+	3|SCEM_1.clean_(paired)_contig_83909:1727-1741|+	2|TWXB_1.clean_(paired)_contig_39830:2162-2171|-	0.47	0	0.98	CACTGGTTGTTGCCTAACACTGCAACTCTCCTCTTTTTCTCATCTGAGCTTAGAACCGGCAATGCCAGAGTTCTATATATTATTAATAATTTAATGATTTTGTGTAATAACCCATAATTAACTGCCAAACACCAAAATTTTAAGTAAACATATAATTTCAGATTTGCACAGGACTATAAGTAAAAACACGAAAAACCACA	GAAAAGACTCATCCTTCAAAAGTTCCAAGTTCAAACCAAAAAAATTGTTCACAAGGGTCAATAGCCCCTGCGGCTAGAACGCACGCAATACAGATATCAAAAGGAGTAAAGTTTTGTCAGCATTTTTGCAGTAATCCAGAGAATACATGCAGTTGTTTCAGCCATAGATGGCATTCATTTGATCAGAGTCCTGTAGCTAT	CCCATAATTAACTGCCAAACACCA	59.778	24	100	100	GTATTGCGTGCGTTCTAGCC	59.699	20	95	100	196	310	505	ACCCATAATTAACTGCCAAACACC	59.778	24	100	100	GTATTGCGTGCGTTCTAGCC	59.699	20	95	100	197	309	505	CCCATAATTAACTGCCAAACACC	58.246	23	100	100	GTATTGCGTGCGTTCTAGCC	59.699	20	95	100	196	310	505
PolynSSR_23	AAAAC	4|AHLA_contig_24397:1173-1592|+	2|SCEM_1.clean_(paired)_contig_22535:1519-1528|-	N/A	1	0.33	0.96	CAAAAAAAAAAAAAAGAGAGAAAAAACCATGAAGGGAGACGCATTACCGTGTCATCACTAATGGAACCACTTCTGGAAAACAGAGCATTGTCATCGGGCATGTTTTCTTGCACAGAAACAAGCTCAAACATAGAACTCGGACTACTGTCTAGGAATTTACCTGAGAGGCTATCTTCGTTGTCCGAATTTTAAAAAACAAA	GTTGGAGTAAAAAAAGCATGATGTCAGGTTGAAACGTGAGAGCCGGAAATCACTTTTATACCAGTGATGCCTGTGTCTTTAAATCTTCGATATCAAAGTTCCAGCTGCTGATTCCTCTTTTATATTCATTCTACACAAAACATCAACTGTTAAGACTAACTCCAGACCAACCACTACTAATATGAAAGCAACTAAATGCT	AGAGCATTGTCATCGGGCAT	59.818	20	100	100	TTCCGGCTCTCACGTTTCAA	59.895	20	100	100	187	281	467	AGAGCATTGTCATCGGGCAT	59.818	20	100	100	TTTCCGGCTCTCACGTTTCA	59.895	20	100	100	188	281	468	AGAGCATTGTCATCGGGCAT	59.818	20	100	100	AGTGATTTCCGGCTCTCACG	60.109	20	100	100	193	281	473
PolynSSR_24	AAAAC	4|AHLA_contig_25010:4548-4967|+	3|SCEM_1.clean_(paired)_contig_135318:533-547|+	N/A	0.5	0.33	0.97	TGACTAAAACGATTTATGGCATATATTTGGGGATCAAAAATGAAATTTAGCTTACTTCAAATTTATCATAACCATGTATATATTAAAAATTTTGGCAAGAGGCACCTAGGGCTAGAATAGTGGCCTCAGAGCATGTGACATACCTAAAAAATCACGCATGGCCTTAACTTGTTACTTGTCCACATAAATGCAAAAAATAA	AAATTCTAAACCGTCTCTGTATTTTTCAAACTTATCTTATGAATCTCTCTATTTTATTTTATAACTTTTGAATTCCTCTACTATTTAAGAAAAAAATAAAAATTTTGAATGGAGACTTGGCCATTTCAGTTGATGGAATTATATATGCTTTGCCTTTTTCTTTGGCAGTATTTAGAGTCATTTTAAAAACTTCTCTACCA	CACGCATGGCCTTAACTTGT	59.119	20	100	100	ACTGAAATGGCCAAGTCTCCA	59.575	21	100	90.48	198	352	549	TCACGCATGGCCTTAACTTG	58.836	20	100	100	ACTGAAATGGCCAAGTCTCCA	59.575	21	100	90.48	199	351	549	CACGCATGGCCTTAACTTGTT	59.731	21	100	100	ACTGAAATGGCCAAGTCTCCA	59.575	21	100	90.48	198	352	549
PolynSSR_25	AAAACA	4|AHLA_contig_122908:137-560|+	4|SCEM_1.clean_(paired)_contig_53473:2808-2831|-	3|TWXB_1.clean_(paired)_contig_45528:3002-3019|-	0.47	0	0.97	TTCGAGTCTATTGGTACTCAAATCTTTTATGAGATCTCTTTACAGATGACGAAAGATCAATTTTACGGACTTGAGTTAAAAAGGATAAAAAAACAAAAATTTTTAAAGATAAAATTACTAATTCCAATTTTAATATTGTTTTTGTCAAAAAAAAATTGATAAATACACCCACAATTTTCTTTACAGACCTGAGAGAAGCC	AAATAGAATTACAGGAACAGTCACCAAATGGTCATCTCAATAAAGGATCAAATTCCGGGCAATGTTACCAAATCAAGTGCTTGCTAATAAATCTACAAACAATAATTTGCTTTACAATTGAATAAAAGAAATCAAACAATCACAGTTTGAGCTCTGATTGAGGAATTTCTCTGAACAAATTGAGCATTGGAAATGTTCTG	TACAGACCTGAGAGAAGCCA	57.395	20	100	100	ACATTGCCCGGAATTTGATCC	59.243	21	100	100	108	317	424	TACAGACCTGAGAGAAGCCA	57.395	20	100	100	CATTGCCCGGAATTTGATCCT	58.966	21	100	100	107	317	423	TTACAGACCTGAGAGAAGCCA	58.11	21	100	100	ACATTGCCCGGAATTTGATCC	59.243	21	100	100	109	316	424
PolynSSR_26	AAAAG	3|AHLA_contig_109737:2363-2777|+	2|SCEM_1.clean_(paired)_contig_28688:2909-2918|+	3|TWXB_1.clean_(paired)_contig_23002:4094-4108|+	0.47	0	0.81	TTAATTAAGTCTTGATTATGCAAGACTTAGGAATATATTTATATACATACATGGTCCCTGGTTTGTTTCTTTCTATATACTTCTCTGAGAGCATCTTTATTTATACAGTCCAGCTCATAAAGAGTGCCCCTCATTGTCACTGTGCTGACTGGTTGTGAACCTCAAAACCACAGTTTCAAAAGAAAAAGAAAAGAAAGAAA	AAAAAATCCTCAAAAGTAATAGACATACATAAATATATCTTCAAATGAAAACAAGAGCCATGGTTGGTGGCAAAGTCATCTACTCGTTTTCCTGAAATCAAATATTTCTCTGACTCTTCTTCATCACTAAAGCAGATCCCAGCAATCATAAATACAAATGTTTGGCCTCTCTGGAAAAGGGAGTAAATTAACAATGAGGC	CCCCTCATTGTCACTGTGCT	59.963	20	100	100	TGACTTTGCCACCAACCATG	58.961	20	100	100	167	326	492	AGTGCCCCTCATTGTCACTG	59.963	20	100	100	TGACTTTGCCACCAACCATG	58.961	20	100	100	171	322	492	CCCCTCATTGTCACTGTGCT	59.963	20	100	100	AGATGACTTTGCCACCAACCA	60.134	21	100	100	170	326	495
PolynSSR_27	AAAAG	3|AHLA_contig_113755:26-440|+	2|SCEM_1.clean_(paired)_contig_108246:269-278|+	N/A	0.5	0.33	0.97	ATTTATAGCACCACAAAGCTTGCTGTTATATAAGAAACATCACCAACCCATCTCCTTTCTCTCATTCCTCTAGTGTTCTCCTTTCCATCTCTTTTCCATTCATCAAATACCCATTTTTTCTCCTAAAAAACAACTCTTTTTCTCTTTCTCTTAAACTTGAGAACTTTCTTTGATTGTATATAAATTCAATTTACATACAA	AAGTGAGATAGAAGAAAATGGGTTTTGTTGTGGTGATATCTTTGCCGCTGATCATCTTCGCAATCATTCTTGGTTTTGGATGCTACTTCCTCGGAAGAGCCAAAGGCCGGCAAGACATGCGCACCGGCATCGGCGCTCAGGTTTACGGCGCTCCGACGCCGCCGCCGGGGATCACCGGACAGGAATCTCACACTTCTACT	TCCTCTAGTGTTCTCCTTTCCA	57.872	22	100	100	AGCGGCAAAGATATCACCACA	60.065	21	100	100	199	90	288	TCCTCTAGTGTTCTCCTTTCCA	57.872	22	100	100	CAGCGGCAAAGATATCACCAC	59.668	21	100	100	200	90	289	TCCTCTAGTGTTCTCCTTTCCA	57.872	22	100	100	GCGGCAAAGATATCACCACA	58.621	20	100	100	198	90	287
PolynSSR_28	AAAAG	3|AHLA_contig_11457:522-936|+	3|SCEM_1.clean_(paired)_contig_3872:387-401|+	4|TWXB_1.clean_(paired)_contig_84910:1424-1443|-	0.47	0	0.99	TAAGTTTCTGAGTTTCACTGACTATAGAAAGCCGAGACAAATATATATGCACTGGGTTATAGCTCTCTCCTGGTTGCTACACTGACCTTGTTCCCTTTGTCTATAGCTTGTCGTGATAGCAGGCATTGTATGGAATCCCCCAACTTCATGCGCGTAATGTTTCTAACAGTTTTCTTCAGTTGTTGCACAATGAGAAGAGA	AAAAATCGGAAAGTTTTGTGACTTCATTTTTTCCCTTCAAAATGAATTGCTTTCACATTGATATGCTCTTGTAACTCTGGTATGCTCTTCTCTTCTTCATAGGTGGGCTGCTAGAGTACTTGTAAACAGTAATGATGCTTGCAGTCATGGACAAAAGGTTTGACAGAGCATTTTTGCCTTACTTTTATGTGGTACTCTAT	CCCAACTTCATGCGCGTAAT	59.267	20	100	100	AGTACTCTAGCAGCCCACCT	59.663	20	100	100	197	338	534	CCAACTTCATGCGCGTAATGT	59.87	21	100	100	AGTACTCTAGCAGCCCACCT	59.663	20	100	100	196	339	534	CCCCAACTTCATGCGCGTAA	61.302	20	100	100	AGTACTCTAGCAGCCCACCT	59.663	20	100	100	198	337	534
PolynSSR_29	AAAAG	3|AHLA_contig_13451:6362-6776|+	2|SCEM_1.clean_(paired)_contig_151848:568-577|+	N/A	0.5	0.33	0.69	GTAGGGCCTTCTAGTGGCTATATTAGTGCTAGAAATTGACTGAATATTAGTTCGTTCAATGAATAATAGGACACATGTAAGAAATATAGGTGTGCTTCGATGAAGAACTATCGTGCTCCTTTAAAAGAAAAGAAAGGGAACTCTACATGAGCGTGCGCTTTGGAGCATGACCTTGCAAATTAGTTGTTTCAATTGCTCTT	AGGCCCTCAATTCTAGTTGCCCCCTCGTGCTCAGCTATAGCACCCCCATGCTCCCAACACGCATGGGTGTGCTTAACCCATTGTATCCTTTTGATTTATTTTGTTTGATAAATCACAGCAGGACACTATACTGAGGAAAAGTGTTTCTCAAGAGCCAATATTGAGGTGACATCAAGACAAGGGTAGTGGTGAAATTGGTT	CTTTGGAGCATGACCTTGCA	58.75	20	100	100	CCTCAGTATAGTGTCCTGCTGT	58.973	22	100	100	194	357	550	CTTTGGAGCATGACCTTGCA	58.75	20	100	100	CCTCAGTATAGTGTCCTGCTGTG	60.181	23	100	100	194	357	550	CTTTGGAGCATGACCTTGCA	58.75	20	100	100	TCCTCAGTATAGTGTCCTGCTG	58.708	22	100	100	195	357	551
PolynSSR_30	AAAAG	3|AHLA_contig_29328:2404-2818|+	3|SCEM_1.clean_(paired)_contig_19452:2185-2199|-	2|TWXB_1.clean_(paired)_contig_88890:868-877|-	0.47	0	0.99	ATAGATCATTGGCAAAGGGAAAAGAAAGATGTCAGTGATAAATGGATTCATCATTTGTGAGCAGTATAGAATCAATTTGCAGCGGTCAAGCATGACATGGTCTGAGTCTAACACCAAGGTTACTTTCCATAGTAGTGGTTTATTATAAGTTTAAAACCACTTGAGTCCTTAATGTTTAGCCATTGTTCATTTTGGTTCCT	TTTATCAATGTTAAATTTAAGGGCTGAAACGAATAATAGCACTAACTTTCATGGTCACATGTGACGTGAATCCTAAATTCCCTTCACTGTGATTTAGATAACAGCGACTAGATTTCTTATTTTAGAACACACAATTTTAAATGCTTTCTGAAGTTCTGGTTTGCAAGTGTTTCATAATCTAATCTATTCATTTATATCTG	ATTTGCAGCGGTCAAGCATG	60.109	20	100	97.5	TGTGACCATGAAAGTTAGTGCT	57.915	22	100	100	200	274	473	TCAATTTGCAGCGGTCAAGC	60.039	20	100	100	GTGCTATTATTCGTTTCAGCCCTT	59.664	24	100	100	186	271	456	ATTTGCAGCGGTCAAGCATG	60.109	20	100	97.5	GTGCTATTATTCGTTTCAGCCCTT	59.664	24	100	100	183	274	456
PolynSSR_31	AAAAG	3|AHLA_contig_38225:3105-3519|+	N/A	2|TWXB_1.clean_(paired)_contig_21935:1419-1428|+	0.5	0.33	0.97	AAGGGTGCATCTAATGGTTAAATAAATAGACCAGGATGCCCAAACAAGGGAAAAACATTACAAGAAGAAAATTAAGGTAAATGCAAACATGGCCACACCTGCACAAGGACCACACCATAGTAGCACATAATAAAACAAACCATGTTTCACCCATATATGCTAAGCATGATATAATTGTCTGAAACTCAGGCCCCTAGTCA	AGAAGGCAAGGTGGGTAAATTAAACCTATCTAACATGGTTTGCAAACATATAATCCGAGAGTCTAGCTAGCAACAATATCTTAGGGGGTTATGAAAACAACCACCACACATGTGCAAGATGATCAGGTTGATGATAAGAATAAGTGAAAAGAAGGAACAGAAACAAGTATAGGTCAATTGTGCAGCTGGAGAAATTCAAA	TCTGAAACTCAGGCCCCTAGT	60.203	21	100	100	TCTTGCACATGTGTGGTGGT	60.107	20	100	100	157	377	533	CTGAAACTCAGGCCCCTAGTC	59.792	21	100	100	TCTTGCACATGTGTGGTGGT	60.107	20	100	100	156	378	533	GTCTGAAACTCAGGCCCCTAG	59.792	21	100	100	TCTTGCACATGTGTGGTGGT	60.107	20	100	100	158	376	533
PolynSSR_32	AAAAG	3|AHLA_contig_68106:783-1197|+	2|SCEM_1.clean_(paired)_contig_127792:635-644|+	2|TWXB_1.clean_(paired)_contig_63751:195-204|+	0.47	0	0.97	ACTTAGCAGGGAGAACTTATTATGATGGGGTTATGATTCATGATATATTATATTATAAGCATGCAAACATGTAGCAAGCCATCATTGTTCTACATGTTAATCCATCTTTCATAATAAATTTCAAAGGAATTGTTAAATCATTACAAGTGATACATTTTTGTGCATGTTTATTCCTTTAATGGTGTTCGTTGTCTTTTAAA	AACACAAGTAAATAAGTGGTTACGTACGTGCTTGTGGATAGATCCATGCAGTAATGATCTCAAAGCAGACAATCACACAATCACATAGAGAATACCACCATTTACTTGGTTTGAAGATAAAAGCTGTTGAATCCGTAGGAGAAAAAGTAGATCGATCACAAGAAACAAAAAGCATACAAAGAAAGATTACATTTAATTTA	TGCAAACATGTAGCAAGCCA	58.674	20	N/A	N/A	CCACAAGCACGTACGTAACC	59.214	20	100	100	191	261	451	TGCAAACATGTAGCAAGCCA	58.674	20	N/A	N/A	ACAAGCACGTACGTAACCACT	59.932	21	100	100	189	261	449	TGCAAACATGTAGCAAGCCA	58.674	20	N/A	N/A	CACAAGCACGTACGTAACCAC	59.809	21	100	100	190	261	450
PolynSSR_33	AAAAG	3|AHLA_contig_7229:3651-4065|+	2|SCEM_1.clean_(paired)_contig_138600:379-388|+	N/A	0.5	0.33	0.99	ATTGCCTTTTGTTTTAGGCTAGCTAGTAGGATGAATGTTGGTACCAGTACATATTTCCTAGTTCCTTGTGGGATCGACAACCTTGCTTTTAAGCTTCTTATATTACTTGATTTGCACATGCACTTGCGTCTCATAGGTGACATTAGTCCCTATCACAAGTCACAAGAAGTTTGCTACATCAACAAAATATTTTAGAAAAA	TAGAGTGGTTTTGGCACATGGAGTTTAAGGTTTTTCTGACGTGGCTTAGTTACTATATCAACACGCTGTTAATGGTGTTGTTGACAGTGTATTGATTAGAAGCAAAATAAAAGTTTAGTGACAAAAGTAGAATTTTTTTTAATTGAATGTCAAAAATAAAAATTTCTTAATAGTTTAGTGATTATCTGTATGTTTGTTTA	GTGGGATCGACAACCTTGCT	60.322	20	100	100	ACTCCATGTGCCAAAACCAC	58.96	20	100	100	172	267	438	TCCTTGTGGGATCGACAACC	59.676	20	100	100	ACTCCATGTGCCAAAACCAC	58.96	20	100	100	177	262	438	CCTTGTGGGATCGACAACCT	59.675	20	100	100	ACTCCATGTGCCAAAACCAC	58.96	20	100	100	176	263	438
PolynSSR_34	AAAAG	3|AHLA_contig_80475:308-722|+	N/A	2|TWXB_1.clean_(paired)_contig_52657:2295-2304|+	0.5	0.33	0.96	CGCTTTGTTTGAAGTGAAAAAAAGAAAAAAGGATATTTGAAAGTATCACAACATTTTCTTATTGAAATTCAGCCCAAACCAAAAGTATTTAATTTGAGATCAAACGAGAACTATATGCTCAAAATCTTTAATAAATACAAACCTCTCACAGAAATCTTAATTGCTAACAAAATGTGTCTCTGTTTGGATCCAAAAATTAA	TTGTCATCTTTGGTTAGAATTGATAAACAAAATAGCACGATAAACACAAATAAATAAAAAATCATCACATAAAATTCAAATCCAAAACATGAAAACAGTGGAACATTCACTAAACGTTCAAGTGAGAAGGACGATCATGATCATCTCGTCAGAGAATCAAAGAGAGACTAAGCCACCAAGAGCATTCATTCATTTGAAAA	TGTGTCTCTGTTTGGATCCA	56.384	20	100	100	TCGTCCTTCTCACTTGAACGT	59.32	21	100	100	177	372	548	TGTGTCTCTGTTTGGATCCAA	57.145	21	100	100	TCGTCCTTCTCACTTGAACGT	59.32	21	100	100	177	372	548	TGTGTCTCTGTTTGGATCCA	56.384	20	100	100	TCGTCCTTCTCACTTGAACGTT	59.9	22	100	100	177	372	548
PolynSSR_35	AAAAG	3|AHLA_contig_82143:605-1019|+	2|SCEM_1.clean_(paired)_contig_103848:190-199|-	3|TWXB_1.clean_(paired)_contig_117389:802-816|-	0.47	0	0.98	CGGCGCAAACACGGATCATGAAAAGCTTTTAGTTTTGTTTTTTAGTTCTTTCTGTTGTTTTTCTGGTTCTCTAGTTTTTTTAGCTTCCAGTTTTCTTTTATTTGCCTCCTTTTTCAGTGTTTGTCTTGCTATGATCTTCTGTTTGTGACTCTTGTTATTTTTCAGTTGTTAATAAATAAACAAATGAGCTCCTTTTTTTT	ATAAATAATGAAGAGAATAGGCTAAGCATACATGGTGCAATAGGAAATGGTATTAGAGATATTAAAAATAGGGTATGATAATAATATTCACTCTTCATTGATAAGTTTACAAATATATTGAATCAATTAATCAATTATTTAAATTTCATGATGTTTTTGATGTTTGGAAAGATAGATAGGTCTTTTACTACTTTTTTTGT	GCTATGATCTTCTGTTTGTGACTC	57.657	24	100	100	TGCACCATGTATGCTTAGCCT	59.787	21	100	100	127	327	453	CAGTGTTTGTCTTGCTATGATC	55.472	22	100	100	TGCACCATGTATGCTTAGCCT	59.787	21	100	100	140	314	453	GCTATGATCTTCTGTTTGTGAC	55.21	22	100	100	TGCACCATGTATGCTTAGCCT	59.787	21	100	100	127	327	453
PolynSSR_36	AAAAG	4|AHLA_contig_13296:1143-1562|+	N/A	3|TWXB_1.clean_(paired)_contig_22878:3482-3496|-	0.5	0.33	0.99	GAAATAATAATAAGAAACGCATACAAAACTGCCAATTACATACCGCAGAGACAAGAGAATCACTACAGGCATAGCATGGTTAAATTGCAGAACATCACCTTGTATGTCAAGTTGGTGGCCATAAAAGCCGACTGTTTAGGACTTTTGAGCATAAATATTTTCAGTTGGAAAGAAAGATGAATATAAAAATTTAAAAAGAA	AAAGGAAACCCAAATAATATGTAAGCCTATCCAGATGCTCTGACTGCTGTTCAGCACAGCAGAACAACTGGAAGAGGGCAGATGACTATATGCCCATCACACGATTTGCATCGTGTGCCACGACTATAACCTCTCCCGTGGAATACCACGCCACCCCATCTCTTAAGGGGTAAGCGCTCGGCCTAGGGCATGATTCATTT	GGCCATAAAAGCCGACTGTT	58.826	20	95	100	TCCAGTTGTTCTGCTGTGCT	59.819	20	95	100	176	316	491	GGCCATAAAAGCCGACTGTT	58.826	20	95	100	CCAGTTGTTCTGCTGTGCTG	59.69	20	95	100	175	316	490	GGCCATAAAAGCCGACTGTTT	59.456	21	95.2	100	TCCAGTTGTTCTGCTGTGCT	59.819	20	95	100	176	316	491
PolynSSR_37	AAAAG	5|AHLA_contig_67771:1361-1785|+	3|SCEM_1.clean_(paired)_contig_68792:3524-3538|-	5|TWXB_1.clean_(paired)_contig_56058:1429-1453|-	0.94	0	1	ATTTTGCTAGATTTTGTTTTGTCCTCACAGGGGGTCGAAGATGAGGCACAGTTGGAACAACTTGAAACATGTAGCCCTCATTAGCGCCATTTGCCATTCCTGGAGGAATCTGTTGACAATAAGTTGGAAATTGTTCATTACATCGTAAAAGTCTTTTAGAACTTGCCCTACATATGACACATTCGATAATGCAGATTAAA	TTAAATTGTGCTTCTACCTGATATTCCACTTGCAGTGGCAGAGAACCATGTGGCCCAACATTCTCATTTGAATTCTGTTCTGCAGATGCAGTCTTCTTATTCCGGTCCACCTTCTGTGCTTTGGGTACACGAGATACAATCTTGGGTTGTGTATCTTCATATGTTTTATCACTTAATAAAAACTTCTCCATCTCTCTTAT	TAGCGCCATTTGCCATTCCT	60.396	20	97.5	100	CCACATGGTTCTCTGCCACT	59.963	20	100	100	197	281	477	TTAGCGCCATTTGCCATTCC	59.541	20	97.5	100	CCACATGGTTCTCTGCCACT	59.963	20	100	100	198	280	477	GCCATTTGCCATTCCTGGAG	59.537	20	100	97.5	CCACATGGTTCTCTGCCACT	59.963	20	100	100	193	285	477
PolynSSR_38	AAAAGA	3|AHLA_contig_83700:162-579|+	2|SCEM_1.clean_(paired)_contig_70623:468-479|+	N/A	0.5	0.33	0.97	ATATATTAAAAAAAAGGGTTACATATAGTGAATATATACAAAGAGTACCAAGCGAATACATAGAGACTGGTCACCGATTATAAGTTATTGGTTACTTTAGTGTTTTCATTTTGTTTTTTCACAAGTTAAAAAGTAAGGAATTCGGACCCTGTTAAGTGTTTTTTTACAATGAATGTGTATAAATATTTGTTCTCCCAAGG	AGTAAATAAACAACGTTTATTAGTAAACAGCATCATCACATCATATATAGTCAGTGTACTGACTAACTTTTACTATCATCATTTGACTGAGAAATCTTTTAACTCCCCATGTTTTAATAATCCAAACAAAACTATGACAACCCAGCAATGTAAATAGTAACTGTAAACAGTAGGCAAACACAGTGAAATGCAGTAAAAAT	AGTAAGGAATTCGGACCCTGT	58.452	21	100	100	GGGGAGTTAAAAGATTTCTCAGTC	57.255	24	95.8	100	195	292	486	AGGAATTCGGACCCTGTTAAGT	59.089	22	100	100	GGGGAGTTAAAAGATTTCTCAGTC	57.255	24	95.8	100	191	296	486	AGTAAGGAATTCGGACCCTGTT	59.089	22	100	100	GGGGAGTTAAAAGATTTCTCAGTC	57.255	24	95.8	100	195	292	486
PolynSSR_39	AAAAT	3|AHLA_contig_100605:102-516|+	2|SCEM_1.clean_(paired)_contig_140986:302-311|+	N/A	0.5	0.33	0.96	GTTGTCTAGTGTAATGTAGAATCATTATCATCATCACTATTGTTATGAAATTTGTCAAATCAATAAATAAATTACATTTATTTAATATATTTTTATTTGAGCCCTCCTTCAAAATTAAATTCAAATTTACTTTCTTTGTTCATAGTAAAAAATCATGAAAATTTTCATTAAAACAAATTTACCCTATTCAAATGTAAAGA	CTAACTTGTTTATTTTTACCAACCAAAATTTGGAAGTAAAAAAGAAAACAAAATTAAAAAGAATGACAACTGCAGTTGAGTACTTGAGTGCATGTGAGGCAATTAAATGAACATATCTCCTTTTTCTGCATAAATTTATTATTACTTAAAAATTGTATGTAAATTGTTCTGTTTGAACTCATGTATATAACTTTGATTCC	Primers not available
PolynSSR_40	AAAAT	3|AHLA_contig_112320:981-1395|+	3|SCEM_1.clean_(paired)_contig_38088:1074-1088|+	2|TWXB_1.clean_(paired)_contig_118950:767-776|+	0.47	0	0.99	TCTCAATAGTCACAGCTTATTATTTATATCCACTTAATTTATAAAAATGTAGTTCATAATGAGAAAGAAGGCCTAGCCTAGATTGTCATAATTTAAATTCTTTTGATTTTATTTTCTTTCTAAAAACACCCACAATTATGCATTACAATGACGGTTATCCTAAATATAAACACCATGTGCACATTATTATTGAATGGCAA	AAATAATAAAAACAACAACATTGAACTGGTTTTAATTGTCTCACTTTGCTTAAATCAGGAGATCATAAAACAGAATCAGAATGTGGTTGCTCACCCTAGAAGGAGAACATATTGCCCAGTTAAGTTGTCAATATTCCTTGTCCTCTGCAACAAGACCAACTGGGGAAGTATCGCAACAGCCTCTAAGTATAACGAGAATG	TGCATTACAATGACGGTTATCC	56.845	22	100	100	TCTCCTTCTAGGGTGAGCAAC	58.82	21	100	100	183	338	520	TGCATTACAATGACGGTTATCC	56.845	22	100	100	GTTCTCCTTCTAGGGTGAGCA	58.82	21	100	100	185	338	522	TGCATTACAATGACGGTTATCC	56.845	22	100	100	TGTTCTCCTTCTAGGGTGAGC	58.82	21	100	100	186	338	523
PolynSSR_41	AAAAT	3|AHLA_contig_117693:475-889|+	4|SCEM_1.clean_(paired)_contig_99979:1031-1050|-	N/A	0.5	0.33	0.99	AGAACCTGTAATCAATAAACACAGCCTCCAGAATGAGAAATAAATCTATTCTATTTCAAGTAAAATCTGTAAAATGAACTGATGGAAAAATTAGAAAGCTCAGAGATTCTTTTTGCATAGAAGAAGCAACCCACTTTTCACATACTCCTTACAAAAGACATTAATTAAAACTGTGAACAGATCAACCCAAACTCACAAAA	AAAAGATCATGTATTTGTTATAATTTTTAGCCAATACAAATGTGCCAAATTTGGTGGGTTCAAGTTAATTCTTATTTTATTTGAAATTAAAACTTTCGTTACCAAGACACAGAAGACTCCTAGGAGAGAACCCACTAGATATTTTTAGTTTTCTTACCTCAATGCTATATTTTGCAGTGTGATTATCTTTTTTCTTGTAA	ACTGTGAACAGATCAACCCA	56.677	20	100	85	AGTGGGTTCTCTCCTAGGAGT	58.995	21	100	100	182	369	550	ACTGTGAACAGATCAACCCA	56.677	20	100	85	GTGGGTTCTCTCCTAGGAGTCT	60.025	22	100	100	181	369	549	ACTGTGAACAGATCAACCCA	56.677	20	100	85	AGTGGGTTCTCTCCTAGGAGTC	60.025	22	100	100	182	369	550
PolynSSR_42	AAAAT	3|AHLA_contig_123840:653-1067|+	N/A	4|TWXB_1.clean_(paired)_contig_48013:4110-4129|-	0.5	0.33	0.98	ATGCTTTCTCATGAGTGCTTAAATTTAGAAAAATTGGGTAGGATTAAACAGGTTGCACATTTAAAACAATCCCATCGATGAATTTGTGAGAATGCCGGATGAAGAAGTTAATCTTGTTAAGAATAAACTAATTGGTATTTTATTATTCTCTTAACTCAAAAATTCAAAAATTGAGAGTTTAAATTCTACTAAATCTTTAA	AAAACTATGATGATGATAAAGGTCACCGACAGCTGGAATGTTCCATATAATATTTTGTCTTTAGAACAAGTCTCAATATTATCCAAACCTGCCATGTTTTATTACATAAAGAATACGAAATCAAATGAACTCATTGACAATTCAAAGAAAAAAAAAGACAAGGTCACAAGATCAAAATATAACATGAAAACTATACAAGA	TGTGAGAATGCCGGATGAAGA	59.445	21	95.2	100	CCAGCTGTCGGTGACCTTTA	59.68	20	95	100	167	284	450	TGTGAGAATGCCGGATGAAGA	59.445	21	95.2	100	ACATTCCAGCTGTCGGTGAC	60.321	20	100	90	172	284	455	TGTGAGAATGCCGGATGAAGA	59.445	21	95.2	100	GGAACATTCCAGCTGTCGGT	60.322	20	100	100	175	284	458
PolynSSR_43	AAAAT	3|AHLA_contig_147428:9-423|+	N/A	2|TWXB_1.clean_(paired)_contig_8655:3175-3184|+	0.5	0.33	0.96	CGGCATTTGAATTTTGATCTTATTGCAAAATGAAGAAGCATCATTCATCAAATCTCTCCACCCATTATCTCTCATTTGTTGTAATCTTTTATTTGCAGCTTTAAGAAGTAACATAGCATTTACAATATTTTTGTCCTTTCTTTGTGAAGTGAAATTCAATTCATTTGTAATCCCCAAGATTGTCATCATTAAATGCATGA	GACTCTAGTAGTTTTAAAAGACAATGTGCTTTTGTTTTTTGATCTTGATGAGTACCATCCTTTTCAATGTCTTCAAATGCAACAAAAATTGAAGAAAACATAGCAATTATATTCAAGAGTGAAGCATAATGAGACCCCCAATGAATATTGCCGGGTTGCTTAATCCTTACTTCTTGGTTCAAGCCTTGTTCAGTTTGCAC	TCCCCAAGATTGTCATCATT	54.267	20	95	100	GGGGTCTCATTATGCTTCACTC	58.528	22	95.5	100	183	178	360	AATCCCCAAGATTGTCATCA	54.267	20	95	100	GGGGTCTCATTATGCTTCACTC	58.528	22	95.5	100	185	176	360	GTAATCCCCAAGATTGTCATCA	55.851	22	95.5	100	GGGGTCTCATTATGCTTCACTCT	59.864	23	95.7	100	187	174	360
PolynSSR_44	AAAAT	3|AHLA_contig_23831:3609-4023|+	2|SCEM_1.clean_(paired)_contig_87650:1332-1341|-	2|TWXB_1.clean_(paired)_contig_66603:1525-1534|+	0.47	0	0.99	GCGTTCATTCCATGGAGAAAAAAAATGTATCAAATCTCAAGAATCCACCATAAGATGTAAAAACAGCATGGTAAAATTCATAGGCAACGAGTTGGCCTTACAGTATTATCAACAGTAGGATGAGAATCACTGGGCGTGGAGCTAGCTTCCTCATTCCCTTCTAGAAATAGAGCAAACAAATAATATCAGGGTTTTTTCAG	TGGTAAGCACGTGCCCAAATGTGATAAGAAAATCTTAAAATTTCATACCAGAGGTATGGGATAGGCCTCGACGCCGTAACTGTGAACTACTGGATTCCTTTTGCAATTGTGTAGATCCTCCCTCACCAGAAGAACATTTTCCTTCTTTTGGCAATATCCATTTTGATAAGGTAAAATGTGGTCCTGAAACATTGACAGTA	GAGAATCACTGGGCGTGGAG	60.461	20	97.5	100	CATTTGGGCACGTGCTTACC	60.109	20	100	100	115	321	435	GCAACGAGTTGGCCTTACAG	59.483	20	100	85	CATTTGGGCACGTGCTTACC	60.109	20	100	100	153	283	435	GAGAATCACTGGGCGTGGAG	60.461	20	97.5	100	TTCACAGTTACGGCGTCGAG	60.386	20	100	100	180	321	500
PolynSSR_45	AAAAT	3|AHLA_contig_24058:740-1154|+	N/A	2|TWXB_1.clean_(paired)_contig_53135:1448-1457|-	0.5	0.33	0.97	GCTTGTAGGACAGGATATATCAATGAAGAAATAACAGAAAAAAGAGAAACATATATAACTCTTCATCATATGTTCATGTTTCCTAACATGACCATCTCAATCCAATTCCAACAAATTAATAGTGATATATATATCATGAGATTTATACACAAATATTGATAATTATTGAAGTGAATAAATCTAGGTAGATTCCATTGCTC	ACTTACTTTGCTCATATATATGAATGCACAAAATATATGAATTTAGTTAGTCCTTGGTGGAAATTTAGGAGATTTTGCCAAATGATATTATCCCTCTTCTTACATCATCAATGGTTTATATAGATATAAGTCGTTAAATTCAATTCAATCAAAAACTTGAAAAGATGGAAACCAATTATATTATTATTTGTATCCGATTC	TGACCATCTCAATCCAATTCCA	57.41	22	100	100	TCTCCTAAATTTCCACCAAGG	55.181	21	100	100	199	288	486	GACCATCTCAATCCAATTCCAACA	59.294	24	100	100	TCTCCTAAATTTCCACCAAGG	55.181	21	100	100	198	289	486	TGACCATCTCAATCCAATTCCAAC	59.294	24	100	100	TCTCCTAAATTTCCACCAAGG	55.181	21	100	100	199	288	486
PolynSSR_46	AAAAT	3|AHLA_contig_25561:124-538|+	N/A	4|TWXB_1.clean_(paired)_contig_91483:1143-1162|-	0.5	0.33	0.67	AAAATAAATATGGAATAAATTTTTAAAAAACAAAATCTAACTCAAGTACAAGATCACACACAATGCCCTTCACCTTCATATTAAAAATTTAATACATGTTCATCTCATTTTATACATTTTTCTTTAAAATTTTCCCCCATATAAGTCCCTCTTGGATTCGCCACTCCTTGTGAAACCATAAATTCTATCTCCAACGAATA	AATAAAAATAAAAATCTCATTGATGACGTTTCAATCTATTATTGGATAATAAAGGCGTTCGATGTTCAACCACCACATCTAAACTACTTGACCTTTTGTAACGCGGCGCGTTGTTATTTGATAAGAAAGTGGACACGTGTGAGACACCTAAATCACCCTCAGTCGCATTAAACGACATTTGCATTTGCACCCAATCAAAA	CCCCTCTAGACTTCTAACAATCCA	59.037	24	100	100	AGGTGAAGGGCATTGTGTGT	59.814	20	95	100	163	35	197	CCCCTCTAGACTTCTAACAATCCA	59.037	24	100	100	GGTGAAGGGCATTGTGTGTG	59.685	20	95	100	162	35	196	CCCCTCTAGACTTCTAACAATCC	57.461	23	100	100	AGGTGAAGGGCATTGTGTGT	59.814	20	95	100	163	35	197
PolynSSR_47	AAAAT	3|AHLA_contig_29377:589-1003|+	3|SCEM_1.clean_(paired)_contig_147176:308-322|+	4|TWXB_1.clean_(paired)_contig_113569:893-912|+	0.47	0	0.97	AGTAAAAACTGCTTTCTATTAAAAGGTGGCAAATAACAAAAAAATATTCTTTATATATGAAAAATAAACATGAATAAAATCTTTTGACAGGATTCCAACATTCTGATATGAAAACAATGACAACCAATGCTTCAATGTCATCATCATGTCCCAAAATTCTCACTTACTTGACTAGACACAACCAACTTGCACCTCCACCA	AAAAAGTTAAGAAAAAGGTTTAGTTTGTGTACTTCTTTTCTCTTTGTACTTAATTTGATGCTTGACATGCATATTCTTGCAATATATTGCATGCATGGCTTCCACTACTTAGTAGTCATGTTCTTTAACTTTAAGCCTAAAGGCATGGCACACAACATTTAAGAACATTCTCATGGCTAAACAAAATCCACAAAGTATCA	ACAACCAACTTGCACCTCCA	60.034	20	100	80	TAGTGGAAGCCATGCATGCA	60.034	20	100	100	145	377	521	ACAACCAACTTGCACCTCCA	60.034	20	100	80	GTGGAAGCCATGCATGCAAT	59.823	20	100	100	143	377	519	ACAACCAACTTGCACCTCCA	60.034	20	100	80	GTAGTGGAAGCCATGCATGC	59.617	20	100	100	146	377	522
PolynSSR_48	AAAAT	3|AHLA_contig_34214:1627-2041|+	3|SCEM_1.clean_(paired)_contig_2440:8666-8680|-	4|TWXB_1.clean_(paired)_contig_7081:6979-6998|-	0.47	0	0.99	TAAAGCAGCTTTGACCTGTTTCCTCAAATTTCTTGCATCTTGCAAGAGTTCGCATTGCAAATGCCATTGCAAGCTGCTTTGAGACCTTACTAGCACCACTCTTATGGCTTGAACCATATGCTCCTCGACCACCCTATTCAAATAAGCATTAGTTAGTGTCATGACGATATCCAAATCAGTCATTGTACCATAGCAAGCAC	AAGATAAATCCAGAAGCACAGTTATAATATGCTGCATAATTATACATTCAAGTTATCAATCAATAAACACAATAACACGGTACAAATGCGGCAATCATTTAATCATGGCATGCAAAGCATATAAATTCAAATTTCCCATAATGATATATTGGGGAAAAAATTGCATTTCATCACTTCCAATGTACTAATTTCATTTACCA	ATGCTCCTCGACCACCCTAT	60.105	20	100	97.5	TGATTGCCGCATTTGTACCG	59.55	20	100	100	195	317	511	ATATGCTCCTCGACCACCCT	60.105	20	100	92.5	TGATTGCCGCATTTGTACCG	59.55	20	100	100	197	315	511	ATGCTCCTCGACCACCCTAT	60.105	20	100	97.5	GATTGCCGCATTTGTACCGT	59.55	20	100	100	194	317	510
PolynSSR_49	AAAAT	3|AHLA_contig_39466:1402-1816|+	2|SCEM_1.clean_(paired)_contig_74822:1555-1564|+	N/A	0.5	0.33	0.98	GAAGAGCTCAGGGTGATCGGCACAGTATAGAGTTTTTAGATCCCCAAGTCGACCAGAGAATCCCTGTTAGTGTCCTACTTTACCGTTTTGTTCCATATCTAATGGACAATATTATTTTAAATTCGCTCTTTATAGCGGTATTTATGTTTTTGTTTACTTATTTTAATACAACTGTTTATCCATCTTTTCAAAAAAATAAA	CTCGGATCATTGGTTGCAACCCTAACATTCAACCTCACCAAAGCTAAAGTATATATCACAGGATCATGGCCCTGGGCATGCATCCCATCGTCGAGCAAAAGCTCAACGACAGCGCATCATATTGTAAGTTAAATAATAAACTAGAAAACCAAAGAATAAAAGTTTTAAAAAACCCTTAAAATTTAATGGGCATGAGAGCC	ATCCCCAAGTCGACCAGAGA	59.959	20	100	100	GTTGCAACCAATGATCCGA	56.208	19	100	100	196	239	434	AGATCCCCAAGTCGACCAGA	59.959	20	100	100	GTTGCAACCAATGATCCGA	56.208	19	100	100	198	237	434	TCCCCAAGTCGACCAGAGAA	60.179	20	100	100	GTTGCAACCAATGATCCGA	56.208	19	100	100	195	240	434
PolynSSR_50	AAAAT	3|AHLA_contig_4149:6945-7359|+	3|SCEM_1.clean_(paired)_contig_6921:4726-4740|-	2|TWXB_1.clean_(paired)_contig_22981:4507-4516|-	0.47	0	0.81	CTTACTGTAATTGCATTGTATTGAAATTGTAGAGATCAAAATTAATATTCCCTCACCTGTGACATGGGTTCTTGAGAGAATGGGGGTTGGTTTGTAGTTGAGTGATGTTGATCACCTCTAATCAAACTGGCAACCTGTAAATCATAAGTCACCCCATTAAACATTTTTTATTATGGTTAGCATGTAAAAGAACAGGATAG	AAGATAATTGACATACCATGGTGAAATGCTCATCCAAGACTTGTGAATCAATATTGTCTACTGGATCAGTGTGGCCTTCTTCAGTTTGTCCTGCATTTTGGGACACACCAGCTTCACTTGTCCCCTATAATTTACAAAGTGTCAATTCTGAATTAATACCACACAACAAATGAATGAAAATAAAATTCAGTAAAGGGGAC	CCTCACCTGTGACATGGGTT	59.598	20	100	100	GGATGAGCATTTCACCATGGT	58.618	21	100	100	200	250	449	ACCTCTAATCAAACTGGCAACCT	59.925	23	100	100	GAAGGCCACACTGATCCAGT	59.674	20	100	100	181	313	493	CACCTCTAATCAAACTGGCAACC	59.809	23	100	100	GAAGGCCACACTGATCCAGT	59.674	20	100	100	182	312	493
PolynSSR_51	AAAAT	3|AHLA_contig_6160:555-969|+	N/A	4|TWXB_1.clean_(paired)_contig_159344:501-520|-	0.5	0.33	0.98	ACTCTAAAGAAAAGACGCAACTCTTAGGAAGAATATGACTCTTTATAATAACAATCACTTGATGAAAAGGTGTTTTTATTCACTTAATCAAATCATAAATAACATATTCATCATTGTAAAAGTAGTATTCAATCTTAGGGAAAGACATTGGATACTCCGTTAGAGAACACTATATATTCAAATCATTTCATCAATAAAAC	AAGAAATATATCGAACCATGTTATTTTATTTTTATTTTTTATGATTATTTTTGTGTGTATGTGTGTGTATATATTCATCATTGTGAAAGTAGCATTCAATCTTAGGCAAAGACATTGGACTCTGTTAGACAACACTATAAATTCTAATAACCACACATTGTCTGTTATGATTGTTTGATCAAAAGCATTAAACAACACTT	TGGATACTCCGTTAGAGAACACT	58.403	23	95.7	100	ACAGAGTCCAATGTCTTTGCCT	59.893	22	100	100	192	348	539	TGGATACTCCGTTAGAGAACAC	57.022	22	95.5	100	ACAGAGTCCAATGTCTTTGCCT	59.893	22	100	100	192	348	539	TGGATACTCCGTTAGAGAACACT	58.403	23	95.7	100	ACAGAGTCCAATGTCTTTGCC	58.491	21	100	100	192	348	539
PolynSSR_52	AAAAT	3|AHLA_contig_63131:107-521|+	2|SCEM_1.clean_(paired)_contig_1612:308-317|+	N/A	0.5	0.33	0.98	TCGTAGTAAATTTTAACTTTTAGACCAATCGGTTAAAAATTATGTAACACGTAATTCCAATGAATTTAACCAAAAATTAAAATCTAGACACTTTCATCTCATAATTTAAACTTTTAACATTATCATAACTAATGGAATTACAAATGAACACAATTTAAAATAAAAATTACATCAATAAACCATAATGTATAAAAACAAAA	ATGTGATTAATGTTTATGCTCAATAGCAACGATGTTCAGGTAATCCATTAAGCCAATCAAATATATAAATACTGCGGTCAGCAATATTATAAGAGAACAATTTGCCAGCAAAACATAGTAGCAATTTATCATCCTTCTTTTTTTCCCCTTGAAGCATTTGAATTTCTGACTTGGTAAATACATATTTTTTACCATTGCGA	Primers not available
PolynSSR_53	AAAAT	3|AHLA_contig_66968:743-1157|+	N/A	2|TWXB_1.clean_(paired)_contig_54336:1412-1421|-	0.5	0.33	0.95	GAAAAAATAGCATAAACAAAAACTCATATTCATATTTCCAATGTTTTGGGGTTGAAAGTGTGGGTTGATGTATCCCACAATTAGAACCAAATTATCAATGGACAGGATCAAGGTATTAAATAATACATTTATTTAGAAAAGATTGCTATCATCTAATTATTCAATGGAAAAAATGTTAACAAGTTCCTAAATTATCAATA	TTTCATTCATATCATTGTAAGAATGGCATTCCACTCAATATCTAGCCAAAGTAAACACCATTGAAATTCTAATATTTTCTACTGACATTTGAAAGGAATATTGGTGATATTTTAATATAATTTGTAAGAAATGAGAACAAAGAAGTCCAGGGTTAAGAAACCCTAGTAATGGATGAAATTCAAAAGCTCATGGACGGCAA	TCAATGGACAGGATCAAGGT	56.122	20	100	100	GGCTAGATATTGAGTGGAATGCC	58.994	23	100	100	168	294	461	ATCAATGGACAGGATCAAGGT	56.679	21	100	100	GGCTAGATATTGAGTGGAATGCC	58.994	23	100	100	169	293	461	TCAATGGACAGGATCAAGGT	56.122	20	100	100	GGCTAGATATTGAGTGGAATGCCA	60.506	24	100	100	168	294	461
PolynSSR_54	AAAAT	3|AHLA_contig_82725:281-695|+	N/A	2|TWXB_1.clean_(paired)_contig_47869:1494-1503|-	0.5	0.33	0.97	CCTCTAACACATTAAGGGCAGCTCTAACCTCTATTTCAGCTGTAAATTCCTGAAAAAAAAAGAATTATATTTTTACTCGTTAGCATTAATAGCAAACATAGATTTTCAATTTTCAGCGCATAGATGATGTGTGTTTGGTGGTAGTTTGTGAAACAAACTCTTGTTTCTTTGTATTAAAAATCAAGATAATATGCAGAATG	AAAAAAATGGTGTCATATGGTTGACCACGCCAACAGGATGTATAAAATTCAAAACCATCAACGTCACATTTAGATATGTTTAAGCAGAAGAAAACAAGCAAGGGAATACATAAATTCAAAACCATCCACTTCATGCTAAGTAGCCTAAGTTTATGGAAATTAAGAAAGTCTATGGCTTGTGTTAGGGACAAAGAAAGCCA	TCAGCGCATAGATGATGTGTGT	60.159	22	100	100	TACATCCTGTTGGCGTGGTC	60.037	20	100	100	145	312	456	CAGCGCATAGATGATGTGTGT	58.792	21	100	100	TACATCCTGTTGGCGTGGTC	60.037	20	100	100	144	313	456	TCAGCGCATAGATGATGTGTGT	60.159	22	100	100	TGTTGGCGTGGTCAACCATA	59.891	20	100	100	138	312	449
PolynSSR_55	AAAAT	3|AHLA_contig_94003:565-979|+	2|SCEM_1.clean_(paired)_contig_3508:221-230|-	2|TWXB_1.clean_(paired)_contig_5886:707-716|+	0.47	0	0.98	TGTTGACCAAGTGGCTTATCCACATTCGTAAATGACGTACAAAAGATGACCTCCACATGAGAATCTCGGTTAGCACGTCAGCAAATCTCCACCAGTACAAACCCAATACCTTTCCATTGAAATAAAATCAAAATCAAATGGTCATTTTGATACGAATTGAAATAAAGTGCTCAAAAGAAATACGAGCAAAATAAGGTACC	AAAGTTACCCCCTCTCATCTAAGTAATACTTAGTTTTATACACCCATGTCAAGCATATCACCTTCTTCCCTAGTATAAAATCCACTAACTCCCATGTGTCGTTCTCTTTATAGCATCTAGTTTTTCATCCATAGCTTCTTTCCAAGCCTTAACGTTGACTACATCTTCATAAGTGACCAGATTTGCAACATTAAGAGAAA	TCTCCACCAGTACAAACCCA	58.191	20	100	95	AGGTGATATGCTTGACATGGGT	59.489	22	100	100	193	285	477	TCTCCACCAGTACAAACCCAA	58.871	21	100	95.24	AGGTGATATGCTTGACATGGGT	59.489	22	100	100	193	285	477	CGTCAGCAAATCTCCACCAG	58.918	20	97.5	100	TGATATGCTTGACATGGGTGT	57.35	21	100	100	200	275	474
PolynSSR_56	AAAAT	3|AHLA_contig_97333:2256-2670|+	2|SCEM_1.clean_(paired)_contig_29551:8970-8979|-	N/A	0.5	0.33	0.99	CAGATTTACCAAGCAGTTACAATTGTTGCCAAACGGTCATGAGTACCAATCATTGTTCATAACTATAGAAAGTAACTCATTCTCATATTATACAGCACATTCTTCCAATATTATTTATTTCACATCATTATGCAGAAGTTGCCATTTGAGTAAGCAGTAAGCACCAATGAATTTGCTGTTTAAATGATTCTCAAGTCAAC	TAAATCCACTGAATACACATGGAATCAACTGACTCAGGCTAACCTGTTTTTTCTTTGCACGTTTTTCCTTCTCAGAAGCCCCACGCTTTGCCTTGTGCTCATTTTCAGCTTGTCCAGCAGCCTCCTCTTCCCGAATCAGCTCCTCTTGTCTTTTTAGAGCAACAGCCTCTTGATGAGCAACTTCAATCCTACTGCTGAAA	AGCACCAATGAATTTGCTGT	56.495	20	100	100	GGAGCTGATTCGGGAAGAGG	59.894	20	100	100	199	359	557	GCAGTAAGCACCAATGAATTTGC	59.631	23	100	100	TGATTCGGGAAGAGGAGGCT	60.326	20	100	100	200	353	552	AGCACCAATGAATTTGCTGT	56.495	20	100	100	TGATTCGGGAAGAGGAGGCT	60.326	20	100	100	194	359	552
PolynSSR_57	AAAAT	4|AHLA_contig_146636:1996-2415|+	N/A	3|TWXB_1.clean_(paired)_contig_86369:2341-2355|-	0.5	0.33	0.98	ACTTGATATAGCACCCCCAAACAAGGGGCGCTCAACACACTCATCCCCCGGCATTTCAATGGTATTCTATATTTGTTTCCTTCCTTATTCCTGTGTTCCAAACCATGAATTCGTAAATTAGCCAATTGAAAACAAAATTTCAGAAGTACAGGATTTAAGAAGCTAGAGAGTCACATCAACTAATGCAGCACATGCACAAA	AAAAGACCTCATTCATAAAGATCCAATCACATCAACTTTTACGGATCAATCCTTTAACATCAAAATACAAAAATGGTGCCCATTTCTGTATATGCCTTTGAGATAAAACCAACGAATTATGATCAAGTTACACAGTGATTGCAGTTCAAGTCTACCAAACAACAGCAAGGAGGAATACCACAACCTAATGCTGCTCCAAT	CACATCAACTAATGCAGCACA	57.165	21	95.2	100	ACTTGAACTGCAATCACTGTGT	58.718	22	100	100	200	371	570	CACATCAACTAATGCAGCACATG	58.897	23	95.7	100	ACTTGAACTGCAATCACTGTGT	58.718	22	100	100	200	371	570	TCACATCAACTAATGCAGCACA	58.589	22	95.5	100	CTTGAACTGCAATCACTGTGT	57.023	21	100	100	200	370	569
PolynSSR_58	AAAAT	4|AHLA_contig_22392:8912-9331|+	4|SCEM_1.clean_(paired)_contig_49565:6275-6294|-	3|TWXB_1.clean_(paired)_contig_94478:4563-4577|-	0.47	0	1	AAAAATCACGTGTGAGATGTCCCACACCAATCATGCAGTATTAGGTCATTGTTTTTGGTCCTTTGAGCACCAGTACTTACCCCAATTCTAGGCTTTTTTGTTGCATGCTGAACAGTATCTCAATTCCATGAAAGCTCAGTCTTCCATTGCTTTACATACTTTTAATTCATGCATTCCCAAAACATGAACCCTTTAAACCA	AAATAAAATTAAAAAGAGAAGAAGGGGTAAAGAAACAAACTACTTGTGTGTTTGTGCAACAGGATTATACAGGTATAGAGTTGGAGACATTCTCATGGTGACAGGCTTCAACAATGCTGCACCTCAATTCCAATTCATGCAACGCAGAAACGTCGTACTTAGCATCGATACCGACAAAACAAGTGAAGAAGACCTTCTGA	TGCATTCCCAAAACATGAACCC	59.962	22	100	100	GCAGCATTGTTGAAGCCTGT	59.684	20	100	100	171	369	539	TGCATTCCCAAAACATGAACCC	59.962	22	100	100	GTGCAGCATTGTTGAAGCCT	59.684	20	100	100	173	369	541	TGCATTCCCAAAACATGAACCC	59.962	22	100	100	AGGTGCAGCATTGTTGAAGC	59.684	20	100	100	175	369	543
PolynSSR_59	AAAAT	4|AHLA_contig_30808:47-466|+	5|SCEM_1.clean_(paired)_contig_70380:346-370|+	N/A	0.5	0.33	0.99	ACCTATTGAAAATTTTCTTTTATTCTCGGCATTTTTAGTACATAATTCCTCTATGTAGGATCCCGGGCATCTAGATTAAGGAGAGTGACACCTTTTTCACCCTCTTAGATACTAACCCATTGTAGTGATTTCAGTCCTTGGTGCATCAGGTTTATTTTCTAATGAGCTTTTAAGTTCTTCTACCTAAAAAATAAAAATAG	AATGTTTAAAAAATGTGAAATGATGTAGAACAACAATTTATAGGCAGTGCTCCTCTGCTCTTAAATCCAAGTTAAAAATTGGGGAAGCATGAGTGCGTATATGTGAGTGTGTAATTCTCCGAGTAAATCTGGTATTTTGGTAGCTAACCAACATATCTACTTTTCAAAGAGGGGATATAGTGTTTTTTATAGTCTAAAAA	CAGTCCTTGGTGCATCAGGT	59.963	20	100	100	TGGATTTAAGAGCAGAGGAGCA	59.16	22	100	100	158	177	334	CAGTCCTTGGTGCATCAGGT	59.963	20	100	100	TTAAGAGCAGAGGAGCACTG	56.953	20	100	100	153	177	329	CAGTCCTTGGTGCATCAGGT	59.963	20	100	100	GGATTTAAGAGCAGAGGAGCACT	60.118	23	100	100	157	177	333
PolynSSR_60	AAAAT	4|AHLA_contig_41675:622-1041|+	3|SCEM_1.clean_(paired)_contig_78777:589-603|-	N/A	0.5	0.33	0.98	TAACTAATATATCTCCACACCTATTTATTCCTTTCAAGGCGTTTGTTGTTTTTATTTTAAAAAAAAATGTAAAATAATGCTTCACTCTCTTTCTTCTAGTCTTCTATAATAACCCAATGGAATTTTTCAATGTTCCAAATTCTTTACTTGGAACTTTGAAATGATATGATACTATCAATAAAAATCATGGTAAGTTTTGA	AAAAAATCATGGCAAGAGTGTCTAATGTCCACTTCTGACTTTTGATACATACTAATTGTTACAAGCATTAGAGAGAGAAAGAATTGATAACTACTTTACACTCCTTACATATATTAATATAGTAGTAAAGGACTTAGGTAGAGTCCTTGGGCTATATGTTAGATTTTAACTCAAATTTAAAGGGACCCAATTAGTAGATA	TGCTTCACTCTCTTTCTTCTAGTC	57.98	24	100	100	TGGACATTAGACACTCTTGCCA	59.363	22	100	100	174	277	450	GCTTCACTCTCTTTCTTCTAGTCT	57.733	24	100	100	TGGACATTAGACACTCTTGCCA	59.363	22	100	100	173	278	450	TGCTTCACTCTCTTTCTTCTAGTC	57.98	24	100	100	GTGGACATTAGACACTCTTGCC	58.997	22	100	100	175	277	451
PolynSSR_61	AAAAT	4|AHLA_contig_5440:2187-2606|+	3|SCEM_1.clean_(paired)_contig_65812:190-204|-	3|TWXB_1.clean_(paired)_contig_167654:605-619|+	0.47	0	0.98	ACAAAAGATCTAAAATTGCTATTCATCATATCTTTATTCCCTCAAAGTTATTTGGTGCAAGTCAAAACTTTTCTTGCATCTTGCCTCAACAACATAAAAACAAGTGAAGTAAACAAAAGAAACAAAACAACCCATACAATGTTAAGAATTTATTCACATATTCAGAAAACCGAACAAACAGTATCGATAGAAAAGTCCAG	TCAACACATCCACCAAAAGCTCAGTGAACCTTCTTCAAGTATCATAAAAACACTATGAATTCTCGATGCTCATCAAGACACCTACTGTTACTGGCATTCAAAATTTGCTTTTCATGACCCATAACAAATCGCAAATTATATGTTAGGAATCAAATGATATAAACAAAAAACACAGAATAAACAATTAAAAAAATGGAAAA	TGCATCTTGCCTCAACAACA	58.31	20	100	100	CACTGAGCTTTTGGTGGATGTG	60.031	22	100	100	172	274	445	TGCATCTTGCCTCAACAACA	58.31	20	100	100	TCACTGAGCTTTTGGTGGATGT	60.159	22	100	100	173	274	446	TGCATCTTGCCTCAACAACA	58.31	20	100	100	CTGAGCTTTTGGTGGATGTGT	58.767	21	100	100	170	274	443
PolynSSR_62	AAAAT	4|AHLA_contig_97819:404-823|+	3|SCEM_1.clean_(paired)_contig_58358:1629-1643|+	3|TWXB_1.clean_(paired)_contig_109811:730-744|+	0.47	0	0.98	CAAAAAGAAAAGCCTAATAATCTCAATTTTTTTTTTGTTCCCCCTCATATTTGGTGAAATCATATTGCTATAACATTATCTTAGATGCTACCGTACCATGCATTGCATCAAAATTTGAATTATAAGCCCATTTTCATTGTTAATTACATCAAATTTTCATCTTAATTCAATTCTCCAAATCTTTATGCTAGCTTATTAAA	AATTTCCTCCTAAACCAAAAATGAGAAGCATGATATGCATATATAATTACTCTCATATGCATCATTCTCAATTCTATGCTAACATTGACCTTATTGCTGAATTCCATTTTTTTTTTTTTTTTTATGTGAAGCATGAACATACATGTATGCATGTCTCCATCAATCAGGTTTATGTGATCCATGTGATAAATATGAAACCA	Primers not available
PolynSSR_63	AAAAT	5|AHLA_contig_17158:2211-2635|+	5|SCEM_1.clean_(paired)_contig_69228:5908-5932|-	2|TWXB_1.clean_(paired)_contig_21981:2434-2443|+	1.41	0	0.99	AGAATTTGAAATCCAAACATGATGGAACATATGCACAATAGACATGTTTCAATGAATCATCACTGCACTCCAACAATCTTTACCCCTTCTGGCTTCTAAGAAATGACTAAAGTAGAGGCCGTTATCTTTAGAGTTTAAGAATAGCATGCAATAATAAGTTCAAACTAACAATCAATTCAAGCAGAATTCAAAAGTATACA	TTAAATTAGTTCCTTCTCTGAAAGTGTATCTAAAACTCAAATCCTCTACCATCTTTTATGCTAATTGCCACTCCTCACACACCACAGGATTACAAAAGTATCAAATATGAACATGCTCAAATGGGTGTCTCAACTCAAAGTACATGTTGGCATGCTGTTCATTTGTTAACTTTGCAAGCATCTGCAACAATAATGCTCAT	AGAGGCCGTTATCTTTAGAGT	55.886	21	95.2	100	CTGTGGTGTGTGAGGAGTGG	60.25	20	100	100	199	313	511	AGAGGCCGTTATCTTTAGAGT	55.886	21	95.2	100	CCTGTGGTGTGTGAGGAGTG	60.25	20	100	100	200	313	512	AGAGGCCGTTATCTTTAGAGT	55.886	21	95.2	100	GGTGTGTGAGGAGTGGCAAT	60.251	20	100	100	195	313	507
PolynSSR_64	AAAAT	5|AHLA_contig_1858:1096-1520|+	5|SCEM_1.clean_(paired)_contig_38484:1768-1792|+	2|TWXB_1.clean_(paired)_contig_68258:200-209|-	1.41	0	0.97	CTCATTTCTCGATCACTACACATATGGACAAGGTCTTAAACTAAACTTGTTATGAACCCAGGTGGTATCAGCTAAGATACATCTTCCAATTGCAATTTATGTAAAGCTGCAATAGGGTCCTGGCACTTAAATAATGCATATAAAGCAGATTTTATCATAAACTCACTGGATGTTGAGCTTAAACTTACGTCCAGTGCACA	AAAACCCAAAATTACAGGTACAATTAGAAGTCAGTCCACCACCAAGCCAGGTACAGAATGCACACCTCATTTTAACATGATTATTTATCAGAAAATCCTTCCTCAAAGTTCAGCTGCTATTAATTCCTTATGAGAAAAGCATCCATAAGCAAGTAAGTTACTACTTGATTATGTAAGCAAGATCACTTACAACAAAACTG	GCAATAGGGTCCTGGCACTT	60.034	20	100	100	GCTTGGTGGTGGACTGACTT	60.179	20	100	100	164	308	471	GCAATAGGGTCCTGGCACTT	60.034	20	100	100	CTGTACCTGGCTTGGTGGTG	60.606	20	100	100	173	308	480	GCAATAGGGTCCTGGCACTT	60.034	20	100	100	TGTGCATTCTGTACCTGGCT	59.308	20	100	100	181	308	488
PolynSSR_65	AAAAT	5|AHLA_contig_38241:361-785|+	2|SCEM_1.clean_(paired)_contig_96025:409-418|+	4|TWXB_1.clean_(paired)_contig_83812:2223-2242|-	1.25	0	0.83	TAGATTTGACTAGAACTAGGTTTCATATTATCAAAATATTGGAATAGAAAAGCTGATCCTCTTGCAGTTTAAGGAAGATCTTCTCATGATCTCTCTCTTTCATTCAGGTAGAGATCTTCCCCGATGGTTAATGAAGTTCATTAATAGAACTGGTTATTATTTTTAGGTTGTTTCAGCCACGCTAATAGCTCTTTTTCCAA	AAAAATAAAAATTTGAGAGACATTAACATACAGAGATTCAGAGATTATCATCCGTTTATGATAAGAAGAATACAAGGTTCTACAATGCAATTGTGTGTACATGCATAGAACACAACAAACACACAAGTTTTATAGGTTTTGCATGGTTCTATGAGTCTAAATCCACTGGGGAATTCATTCGCTGGGTTATTAAGTGTACT	AGGTTGTTTCAGCCACGCTA	59.892	20	97.5	100	TGCATGTACACACAATTGCA	56.54	20	100	100	166	364	529	TAGGTTGTTTCAGCCACGCT	59.892	20	97.5	100	TGCATGTACACACAATTGCA	56.54	20	100	100	167	363	529	GGTTGTTTCAGCCACGCTAA	59.051	20	97.35	97.5	TGCATGTACACACAATTGCA	56.54	20	100	100	165	365	529
PolynSSR_66	AAAAT	5|AHLA_contig_39598:1582-2006|+	5|SCEM_1.clean_(paired)_contig_44237:4525-4549|+	4|TWXB_1.clean_(paired)_contig_54475:8760-8779|-	0.47	0	1	AACAAATCAAAATCAGAACATTGTTTGCAAACGAAAGACAAGGAGTTTCACTAAGGCATCCATAAACTTCAACGATACTTAACAGGCACAAAGACCAGAGATTCAATAACATGCACAAAGATCAATTGAAATGTGGGAAGCCGGTGGCGAGCATGGTGCTGTAGCTGCACTGCAGTAGCTCAGGAAATGCAAACACATCA	AATCCAATGATATATGACATGAAACATAACAATAGGCACAAACCTGTGAACCTAAGCATACGAGACTGGGTTTCTCTGAGAGTGAATGACACTGACATGGTTGTAGTGAAGAAAACAAACAAGGACATAATAAGAACACCACATTTGGTGACAAAGTAGTCTGCATGACAAAGGAAAAGACTAATTAGAATGAGAACATT	GCACTGCAGTAGCTCAGGAA	60.037	20	100	100	CTCAGAGAAACCCAGTCTCGT	59.11	21	100	100	139	366	504	GCACTGCAGTAGCTCAGGAA	60.037	20	100	100	TCAGAGAAACCCAGTCTCGT	58.003	20	100	100	138	366	503	GCACTGCAGTAGCTCAGGAA	60.037	20	100	100	CCCAGTCTCGTATGCTTAGGT	58.967	21	100	100	129	366	494
PolynSSR_67	AAAAT	8|AHLA_contig_82319:1780-2219|+	2|SCEM_1.clean_(paired)_contig_144360:757-766|+	N/A	3	0.33	0.94	ATGCATACAACAACATGTTTATGTGTGCTAATGAGATAGTCAAGAAGAAGAGATCACAGAGAGAGAAATAGAGGATCTTGTGTTAGTGGGAAAGGGTCTTGCATGAGCTTTTCTTTGAGTTTAGTAACATTACCGTTTACGTTAACAAATAGCACTAAACTTGTGAGTTGTGACTTTATTATTATTTATATGCATTTAGA	ATTAAGGATATGGATATTTTTTTCCCCTGTTTTAAGCTCATCCTCCTCTTGTTTCTTCTTCATCTCTCTTAACTTTTCTTCATGCTCACTTTTTGACCAGTCCTTTCATTCAGAGACTGGTTGAAATATGTGATAAGAAGAGTGGCATGCTCTATGCCACTTTTTCCTCTGTCATCTGTCCATGATATAGTGCTTGCAAA	TGGGAAAGGGTCTTGCATGA	59.223	20	100	100	AGGATGAGCTTAAAACAGGGGAA	59.666	23	100	69.57	198	286	483	AGTGGGAAAGGGTCTTGCAT	59.22	20	100	100	AGGATGAGCTTAAAACAGGGGAA	59.666	23	100	69.57	200	284	483	GGAAAGGGTCTTGCATGAGC	59.186	20	100	100	AGGATGAGCTTAAAACAGGGGAA	59.666	23	100	69.57	196	288	483
PolynSSR_68	AAAATA	4|AHLA_contig_25622:1133-1556|+	N/A	2|TWXB_1.clean_(paired)_contig_80351:875-886|-	1	0.33	0.99	AAGAAGAAAGAGAACATGTGTTGTATTCGTGTGAGTTTACGCTGGACAGGGGATGTTTACAATCAAAAGGAAATGTTATTGATCAATGGCCAAGTGGTCTATTGGTATTTATGTCCTCATTAAAACCGTTCACAAGTGATGAGAGTTCGATTATCGGATGAAAGCATATTTTTAGAAGTGTGAGCACCGCTCATTTTGTC	ATAAATGTTATTTAAAGATTCTGCTTTACTCAAAGACTTTATTCCAAAGATATAATGCTGATTTGTGATATGTTATAACTATAAACTGGTTGCCATAAATAATTGATTAGGTTTTCTATTTACTATAGCTTATTAATTAAGATATTCCAGATATACCAATTAGAGATGAGAATTTTATGTAGGCTAATGCTTATACACAC	Primers not available
PolynSSR_69	AAAATA	4|AHLA_contig_90639:347-770|+	3|SCEM_1.clean_(paired)_contig_31713:1412-1429|-	3|TWXB_1.clean_(paired)_contig_28962:951-968|+	0.47	0	0.99	GTCAAATCATCCTTAATAATAGCAAAAATGGAGTTCTCAAGAATAGTCATTTGTCATTCAGTTTACATTATTTTCTTTTTTAAATGTATCTAATAATTCCGCTGAAACTTTATCACAATTTATACCATTATCAAGTTACACCATGGATTTCTTTCTGGTGTTATTTTTAACATTTTTCCAAATTAAAAACTTCTCCAAAT	AACCAGAAAACAAATGCTTACCAGATAAACTAATTAATTAAACCTTTCCACAGATCTTAGCAACAAAGGCCTTGAGATTAAGATCAGAGGATCCACCTTTACTCCCATCCACCAAAGCCTTGTCTTTCCACATCTTAGCTCTTGTCCTAATCTCAACACCCTTCTCACCATTCCCCATCACCAACTCTAAACATCTCACA	CACCATGGATTTCTTTCTGGTGT	59.172	23	100	100	TGGTGGATGGGAGTAAAGGTG	59.367	21	100	100	200	338	537	CACCATGGATTTCTTTCTGGTGT	59.172	23	100	100	GTGGATGGGAGTAAAGGTGGA	59.087	21	100	100	198	338	535	ACCATGGATTTCTTTCTGGTGT	57.882	22	100	100	TGGTGGATGGGAGTAAAGGTG	59.367	21	100	100	199	339	537
PolynSSR_70	AAAATG	3|AHLA_contig_28899:113-530|+	2|SCEM_1.clean_(paired)_contig_147166:586-597|+	3|TWXB_1.clean_(paired)_contig_41354:1888-1905|+	0.47	0	0.99	TCATATGTTTTCATATATATAAAAATATATGATCGTGAGATAATTAGGTAGCTTTAGAATACCAGTTAGTTAGTTTTACTAATTAAATTCACTGAAAGAAGTTAGATCTCTTGAGGATTTTTGAAGATCTAAGCTTTTGACTGTTGAATGTATCTTGCTCCTCTCTGATCCAAGACTTTGTCAAAAATAGGAAGTAAAAA	AAAACCAAGACTTTCTTCTTTATAAAGTTAAACTACTTTGCATTTTTATGATCATCTGTATCTACAGTGAACATTCCATTGTGTTGCATAAACTTAGATCTGAAATTGTACAACCATACTTAAACAGGTACGTTTTTCTCTCAAGTCTCATCTTCTTCATAAAACAACAAACTTGTCAATCAAGTTGGCAGTCTAGTCTT	TGCTCCTCTCTGATCCAAGAC	58.893	21	100	97.62	TGCAACACAATGGAATGTTCAC	58.285	22	100	100	151	267	417	TGCTCCTCTCTGATCCAAGAC	58.893	21	100	97.62	GCAACACAATGGAATGTTCACTG	59.263	23	100	100	150	267	416	TGCTCCTCTCTGATCCAAGACT	60.292	22	100	95.45	TGCAACACAATGGAATGTTCAC	58.285	22	100	100	151	267	417
PolynSSR_71	AAAATT	3|AHLA_contig_34242:1418-1835|+	2|SCEM_1.clean_(paired)_contig_11585:2991-3002|-	N/A	0.5	0.33	0.98	AGCCAATAAAGCTTGATTGTAAGTTTTGCAGCAGTGAAGATAATCTTTTATTGAATAATCTTGAGAGATAATTTGCATTTTCATTGCAGTCTCCTGTTGCTTGTCTAGCCCTTAGAACTGGCAGGCATCCTTGAGCTCCTGCTGCAATGATCACAAACTTGCGGCCACCAAGATTGTATATATTCTATTAACATTTTATA	AATCCATCTTTCAATAATCAAAATATTTTAAATTGAGTATTGAAATTTAATTAGTATATATTTATATGACACCTCGAGAAATGGTTGCAGTGAAGAGATTAATTGATCCACATACTGCTCAGGATCAGTGCCATTAAGTGTTATGGAAGAGGTACCAACACCATTGTAAACAAGGATGTCATTGTTTCCAATGTTGATAA	TGCGGCCACCAAGATTGTAT	60.035	20	100	100	AATGGCACTGATCCTGAGCA	59.378	20	100	100	194	359	552	TTGCGGCCACCAAGATTGTA	60.251	20	100	100	AATGGCACTGATCCTGAGCA	59.378	20	100	100	195	358	552	TGCGGCCACCAAGATTGTAT	60.035	20	100	100	ACTGCAACCATTTCTCGAGGT	59.928	21	100	100	150	359	508
PolynSSR_72	AAAATT	3|AHLA_contig_39876:212-629|+	2|SCEM_1.clean_(paired)_contig_147373:632-643|-	N/A	0.5	0.33	0.99	TCCAGTGAGAAATGTTTAGGTGGATGTCAAAATTGACATGGAAATGCCGGTTTTATATATGATTAATTTACGTGATGTAAAATATGTTTATATGCACCTATGTGGCTTGTAAAAATGGCACTCACTTGTCAATTTTTTACCGGATTCCATTGAGTAACCTCTTATTGAAACTAAATTGAATTTATATGATTATCTTAATA	TAGTAATAAAAAAAATTGATATAATCCACTCATCTTCATTAATATTTACCCTTTTTTGAAAAACCATGTGTGCAATCTTGTTATTGTGCAGCGTGCACAATCTCATAGATAAAATATTGCAATATTTAAAAATAGCCTTCCCATCATATTAACAAAAGGAAAATATACACAAGCTTTTGTTAAAAAAAATTTATTGGTCA	ACCGGATTCCATTGAGTAACCT	59.156	22	100	100	GCACGCTGCACAATAACAAGA	60.069	21	100	100	176	338	513	ACCGGATTCCATTGAGTAACCT	59.156	22	100	100	GCACGCTGCACAATAACAAG	58.67	20	100	100	176	338	513	ACCGGATTCCATTGAGTAACCTC	60.118	23	100	100	GCACGCTGCACAATAACAAGA	60.069	21	100	100	176	338	513
PolynSSR_73	AAAC	3|AHLA_contig_116800:286-697|+	2|SCEM_1.clean_(paired)_contig_97433:186-193|-	N/A	0.5	0.33	0.98	TGGCGAGAGAAACTAACTTTGGATCCACACCAGATAAGGTGACAGTAAAATTGACTAGCATCCTTTATTCTGAATAGAACCGAATTTTATATATTTGATTTGCATTTAATAATGAATTTAATCTTATTTTCTAAAAAAGGAAATGAGTGTACTATATATATTTTATATATAAATTCACTGTCAGACAGTCAAAGAGCCCA	AAATTAATCTAGTTTAAGATAAAAATAAAATAAATATATATGGTTTTAATTGATGTGACAAAACAGATAACAACTCAAATTTTAAGAGTCATCCACAACTTTAACCTTACAACAGAAAATGTTAACAACTTATGCTGGCCGCACTAGAAGTGCAAAAAGATGCATGCCCAACAGATAGAGATGCATGCGTCTAATTAAGA	TCAGACAGTCAAAGAGCCCAA	59.232	21	100	100	CGGCCAGCATAAGTTGTTAACA	59.514	22	100	68.18	173	380	552	CAGACAGTCAAAGAGCCCAA	57.739	20	100	100	CGGCCAGCATAAGTTGTTAACA	59.514	22	100	68.18	172	381	552	TCAGACAGTCAAAGAGCCCAA	59.232	21	100	100	CGGCCAGCATAAGTTGTTAACAT	59.871	23	100	65.22	173	380	552
PolynSSR_74	AAAC	3|AHLA_contig_117133:677-1088|+	2|SCEM_1.clean_(paired)_contig_48272:732-739|-	N/A	0.5	0.33	0.97	ACACCAGTATCGAAGATCTACGAAGAGCGAGATCCAGATCGGACCAAAACGAAGATCAATCCTCGGATATCGGAGGAAAATGCAAAGAAGAAGAGAAGAACCGAAGAGAAATGGGGAAATTTCTCGGTATTTTCAAGAACCCAGGCCTCGTTTTCCAGCTTTTCGTTTTCTTGAAAACATTTTTTCCCAAATTTCTTGAT	AAGATGAAATGAGAAAAAAAGGAAATTACCAAAGAAAAACGAAATCATTAGTTTGGCAAACGGACTCATGAGTCATGGCCGTTGGATCCTGAAAGGGACATTATAGTAATTTTATATTTTCTGAAGTTACGGTGGAGTGCCACGTGTTAACATAGAGAACATGAAATTTAAATTAAAAAAAAAAAGAATAGTTGGAGGCC	AGGCCTCGTTTTCCAGCTTT	60.179	20	100	100	GATCCAACGGCCATGACTCA	60.108	20	100	100	158	342	499	AAGAACCCAGGCCTCGTTTT	59.815	20	100	100	GATCCAACGGCCATGACTCA	60.108	20	100	100	166	334	499	AGAACCCAGGCCTCGTTTTC	60.251	20	100	100	GATCCAACGGCCATGACTCA	60.108	20	100	100	165	335	499
PolynSSR_75	AAAC	3|AHLA_contig_120835:1907-2318|+	2|SCEM_1.clean_(paired)_contig_106937:2080-2087|+	2|TWXB_1.clean_(paired)_contig_136671:573-580|-	0.47	0	0.99	ATGACTAAATGCAGAAAAACATAAGTAACATTTCAAATCTGGGGAACCATGCAACGCAGATATGAATGCCATATAGAAGCAAACGAGGAAGTTCAGGACTCAGAATAGAACCCTTCCTAATGGGCTCATTTTGTGATCTAGCTAGCAATATTCTGGAGCTTGGATATATATAAATCTACTGTAGAGAAATGATTCATACG	ATAAATCATAGTCAGATCATCAGATGAAGAATGGATGCAGATAAAAGTTCGAAACTGAGCCATGATTCACCCTACACCATTTCCAAATAAAAGCCACAAATGGATTACTAAAAAACACAAGGTAAATCAAACTCCAAAATATTCTACCTATCAGATCATCCCCCTTCAGCAAAGGCAAAAGACTTTTCCTATATAACTTA	TGGGCTCATTTTGTGATCTAGCT	60.054	23	100	100	TGGTGTAGGGTGAATCATGGC	60.065	21	100	100	171	320	490	CCCTTCCTAATGGGCTCATT	56.941	20	100	100	TGGTGTAGGGTGAATCATGGC	60.065	21	100	100	181	310	490	AGCAAACGAGGAAGTTCAGGA	59.584	21	100	100	TCATGGCTCAGTTTCGAACT	57.161	20	100	100	200	277	476
PolynSSR_76	AAAC	3|AHLA_contig_52166:78-489|+	N/A	2|TWXB_1.clean_(paired)_contig_120279:2137-2144|-	0.5	0.33	0.98	TCCTACTGAGACCTTTCCTTGACAACAGCATCAAAACCATGACATGCACTAGACGCAACCCTGGTACTACAAGTATACAGGTCGTGAGGTAGTACAATGCTTTAAAAAAGCAAGGATCGAATCCATAGGGAATAGATCAATAGTAGAAGGGCTCCATTATTTCTATCTAGCTCGACAAAAAGGGGAATTGAATCTGAAGA	AAGAGTTGACAGAAGAATAGAAAAAATCAGAGAAACATATGAACTGGTCAATCAAGGAAGAATGAGAGCCAAGACTAATTTCACTTGGGATATGAACAATAGAATAATTACAATTGCAATGGAAGATCTTTGGTCTATTAAACCGAGAGAAATCAACATTGTACAGGGTGATTTTTCATGTCGCCCTAGTACTTAGTCCC	GGTCGTGAGGTAGTACAATGCT	59.834	22	100	100	TCTTCCTTGATTGACCAGTTCA	57.295	22	100	100	194	156	349	AGGTCGTGAGGTAGTACAATGC	59.834	22	100	100	TCTTCCTTGATTGACCAGTTCA	57.295	22	100	100	195	155	349	GGTCGTGAGGTAGTACAATGC	58.463	21	100	100	TCTTCCTTGATTGACCAGTTCA	57.295	22	100	100	194	156	349
PolynSSR_77	AAAC	3|AHLA_contig_57321:1382-1793|+	4|SCEM_1.clean_(paired)_contig_120873:371-386|-	N/A	0.5	0.33	1	ACACTTGTTGAGATCTATCTCCGCAATGGCTCTACCAGTGAAACCACCGTCAAGAACCTTCTTCAGCAAATAGTAAGTGATGAGCTCTTCATCAGTGGGATGAAACCTGAACCCAGGAGGGAGCTGAGCTTCAGCATCACTAGCATGAAAACTATGTATTCCACACAACTCCATCAGAGGGAAAGGAAACCAAAAACAAA	AAGAAAAAGAAAACTCAAGAGATGATGAGAAGTCTAAGAATGAGGAGATGCAATGGTGTTGTTTTGTAGTGGAAGTAAGAGAAGTATGGTGGGTTGTTCTGGTGCTGCTGCCCCTGCATCCACTGCTGCTGTTGCTGCAATGGCAGGAAGAGCAGCAGCAGGTCTTATGATATCCATGAGTGAGCTGTGCAGGGGAGAGA	TGAGCTTCAGCATCACTAGCA	59.448	21	100	100	GCACCAGAACAACCCACCAT	60.828	20	100	100	193	324	516	TGAGCTTCAGCATCACTAGCA	59.448	21	100	100	GCAGCAGCACCAGAACAAC	60.008	19	100	100	199	324	522	CCATCAGAGGGAAAGGAAACCA	59.958	22	100	100	CTGCTGCTCTTCCTGCCATT	60.68	20	100	100	200	370	569
PolynSSR_78	AAAC	4|AHLA_contig_26494:2093-2508|+	3|SCEM_1.clean_(paired)_contig_31561:2294-2305|+	N/A	0.5	0.33	0.99	GAGTGAATACAAGATGAATCAAATGGCATAAGGCAGTTATATATTACCACTCGTATTTGAATCATATTGACTAATGGAAAGGTATCAGGCAAATATATGAAAATTTGAAGATGTAACATAAATCATCTATCCAAAAACAATACATTATATCATCAAACAAAAATAAAATAAAGATGAAATACAAAAAATTAAAAATTAAA	AAAGAAAATAATGAAATTAACAAAACTTCAAATATGTTAATTACAGCAAGCTTTAATCTCATTACTTTCTAATTGTATATACAAAGATACCCGAAAATACACATGAACCCAAATAATCGCTATCATCTGTTCAACCATTTTCGTATTCAGTTTAGTCTTATTATTCAATGCAATTTGAAACAGTCTTTCAAATGCCTCTA	Primers not available
PolynSSR_79	AAAC	4|AHLA_contig_45022:2316-2731|+	N/A	3|TWXB_1.clean_(paired)_contig_64679:2723-2734|+	0.5	0.33	0.99	TAGGGCCCGATGGAAATAAAACGTTTAGTGTTATGCAGGAAAAAGAGTAGGGTGTCAAATATATCTACAACGCCATGTACCTCCTTTATATGTTCAAGCTCTGAGTCATCATCAAGAAAAAAACTGAGGTACTTGACCGGAATATCCACCTGAGCGTAAAAGGCAAAAACTTAGTTGCCACCCATAGTACCAAAATAAAA	AAAACAAAAAGGCTTGATGTGATTATAAATTGGTCATGCAATAATAACTGGCTGCATTGCACTGAAAAGCTGTGTACATTTTACTTAATCTAGAGAACAGTAACGATGACATGATGATACATTATCAAACATACAGCACCATAGGAGGTAACCACTAGAACGCCGAAAATGGATCCAGCATATCTGATCACTAATAAGAT	TCCACCTGAGCGTAAAAGGC	60.321	20	100	100	TTTTCAGTGCAATGCAGCCA	59.249	20	100	100	140	344	483	CGGAATATCCACCTGAGCGT	59.611	20	100	100	TTTTCAGTGCAATGCAGCCA	59.249	20	100	100	147	337	483	TCCACCTGAGCGTAAAAGGC	60.321	20	100	100	TCAGTGCAATGCAGCCAGTT	60.825	20	100	100	137	344	480
PolynSSR_80	AAAC	4|AHLA_contig_58417:262-677|+	N/A	3|TWXB_1.clean_(paired)_contig_40484:619-630|-	0.5	0.33	0.98	ATACATTTAACTCAAGGGCCCAGTTTTATGGACCACATATATTTAAAATTATAAAAATATCAAAACCCAACTACCTACAGACATGATATATCTAGAATACAAAATTACGAGCACGTGTTAATTCTTGAATTTATTATTCTGGGCCACATATATTTTGAATTATAAAATTATCAAATCCTACCACAAATCACATCTTAAAA	TCGGCCGGAAATCAGCCGTTGGATCAATCGTGTGTTAATTCTTGAAATCACTGGCTCTGGGACCACATATATTTTGAATTATAAAAAACAAACATGTAAGACATTACATTGACAGGTTACATTTAAAATGAAAAACCGGTTCTGACCCATGTGGGCAATTGTATGTTAATTTTTGAAGTCATTGTTCTAGGACCACCTAA	ACCCAACTACCTACAGACATGA	58.213	22	100	72.73	ACGATTGATCCAACGGCTGA	59.751	20	N/A	N/A	183	264	446	CGAGCACGTGTTAATTCTTGA	56.944	21	100	100	ACGATTGATCCAACGGCTGA	59.751	20	N/A	N/A	140	307	446	CGAGCACGTGTTAATTCTTGA	56.944	21	100	100	TATGTGGTCCCAGAGCCAGT	60.253	20	95	100	178	307	484
PolynSSR_81	AAAC	4|AHLA_contig_76289:183-598|+	N/A	5|TWXB_1.clean_(paired)_contig_66296:3536-3555|-	0.5	0.33	0.99	AAAGAGCAAATCACAGGGATTGTGAGACACTGAGACTACAAGGAAACAAAACATATATTTCACATTGTTGCATGCCTAAATCAGGAAAGAACTAGAGTTGCTCAGCAATTTGCAGCACATCCTACTACAACAATGTTTGATTATTTTCTTATAATATGTAGAAAAGTTGGGGAAACGGTACAATAATCCGAATTAAAGAA	GATCGGCGCGCTTGACTTAATATACACATGAATTAATCGTCAGTTGAAAATAACTGGTCCTGCTTCGGAATTCAGAAATATGAACAATAGAATGCGAACTGCGAAGGCTGGTTTTCCTCCCTCTACTTTTCTCTGGATTTCCAGGTTTGGAGAATTTCTACTCTAACTTCTTCAGCTTTCCCTCAGCATGAGAGTTCTCG	TGCTCAGCAATTTGCAGCAC	60.319	20	100	100	TGAATTCCGAAGCAGGACCA	59.31	20	100	100	192	280	471	TGCTCAGCAATTTGCAGCAC	60.319	20	100	100	ATTCCGAAGCAGGACCAGTT	59.307	20	100	100	189	280	468	TGCTCAGCAATTTGCAGCAC	60.319	20	100	100	AATTCCGAAGCAGGACCAGT	59.307	20	100	100	190	280	469
PolynSSR_82	AAAC	6|AHLA_contig_23734:151-574|+	N/A	4|TWXB_1.clean_(paired)_contig_57911:1380-1395|-	1	0.33	0.99	TTAATGGTAGAGGTTACTCCACGGGAAGATAATCTTATTGCTAACAGGCTTGCAAAATTTGGGAAACATTGTCACCAGCTCTCCCTATTTCTATAAGGAAGAGATCGCTCTTGGTGGCTTGACAACCTTTGCAAAACCTAGAAGCTCTTCTTCTAGCCTTTTTTCTTTTTTTTGGCTCTTATATCTCCTTTAGCAAACAA	ATTCATAGTCCCAAACTCACCTACATTGAGAGCTTTATGAGCTTGCTCAAGATCATCAATGGCGAATGGCGCCTCCATACTAGACCAAATAGCCATCAATACAACTAGAAACATATTCACGATCACAAGAAATTGGTTGATCTTTCATGGACTTGATGAAGTCGATGTTCTTTATATCCTGAAAGATGGTAATAACATTA	GAGATCGCTCTTGGTGGCTT	60.108	20	100	100	CGCCATTCGCCATTGATGAT	59.405	20	100	100	195	250	444	GGTGGCTTGACAACCTTTGC	60.249	20	100	100	CGCCATTCGCCATTGATGAT	59.405	20	100	100	183	262	444	GCTCTTGGTGGCTTGACAAC	59.688	20	100	100	CGCCATTCGCCATTGATGAT	59.405	20	100	100	189	256	444
PolynSSR_83	AAACA	4|AHLA_contig_85058:2532-2951|+	3|SCEM_1.clean_(paired)_contig_91083:981-995|+	4|TWXB_1.clean_(paired)_contig_143205:239-258|-	0.47	0	0.99	GTTTCTTCTGCTCTTTCACCTAAATGATTCAGTATCCTTCCATTGAATGAGAGGGAATACCTGCGGATCATGTGAGAAAATATTTGTCTGAATTATGAAGTTGAAGACAAGAAAAGTTCTAAACAATTTCGCTTTCCAGTGTATCTGGAATGGGAACACAAAAGAGGTAGCTCTAACAGGATATGTGAGCACCAATACTC	AAAGCAAAGCAATTATATTCTTCATTATATGTATTATCAAAACCAGTTCTTTAGCTACTCAAAATCACAATTGGCTTCCTGCTGTATATCTTGCTTGGAGCTTCTTTATATGAATCTCTCAGGTAGATATACAGAAGCTCTCAGGTATTCCCTTTATATGCATCTCTCAGGTATTCCCTAATTCTTTATATGAATCCCTC	TGGGAACACAAAAGAGGTAGCT	59.558	22	100	100	GCAGGAAGCCAATTGTGATT	56.955	20	97.5	100	152	350	501	TGGGAACACAAAAGAGGTAGCT	59.558	22	100	100	AGCTCCAAGCAAGATATACAGCA	59.865	23	100	100	172	350	521	TGGGAACACAAAAGAGGTAGCT	59.558	22	100	100	GCAGGAAGCCAATTGTGATTT	57.676	21	97.6	100	152	350	501
PolynSSR_84	AAACA	6|AHLA_contig_117432:642-1071|+	4|SCEM_1.clean_(paired)_contig_9872:345-364|-	N/A	1	0.33	1	TAATGCACTATTTTAGTTTTCCCTATTTGGTCCATATATCCTGTGGTGGCTCTTTATTAGCATGAGTGTATTTTCTCTGCATATTGATAAACAAATCAAAGAATTCTTATAATAGTTTAAATTACCATGGCTAGTCCTTGAATTATATGGTGGTCCTTTATTCCAATTAGTCCTTCAATTATATCATGGTCCTTTAGTCT	ATGAATACTTCTACCATTTTTAAATTCATGTTTCTCTGACACTATTGTCAGATAGAACAATCATAGTCAGTTGTCTTCCCTACATACGCTACTTTATAATGGGAATCTTCATGGCCATAATCACTTGACTCTAGATTGAGCAAGTACATAAACCATACCACACATGTAAACTACCATATAATTTAAGGTGAGATCCTAAA	ACCATGGCTAGTCCTTGAAT	56.192	20	100	100	AGCGTATGTAGGGAAGACAACT	58.902	22	100	100	197	323	519	ACCATGGCTAGTCCTTGAAT	56.192	20	100	100	AGCGTATGTAGGGAAGACAACTG	60.119	23	100	100	197	323	519	ACCATGGCTAGTCCTTGAAT	56.192	20	100	100	GCGTATGTAGGGAAGACAACTGA	60.119	23	100	100	196	323	518
PolynSSR_85	AAACAA	3|AHLA_contig_67366:516-933|+	3|SCEM_1.clean_(paired)_contig_15230:1889-1906|-	2|TWXB_1.clean_(paired)_contig_130838:2017-2028|-	0.47	0	0.99	ATCTTTTAAAAATAAAATAATTCAAAATTTTGGATTCAATGAAAAAGAAAAGACCAATTCTTGCTTTAAAAACAGAAGCGCACACAGATGAAACTATTTTACACTACAATTGGAATTGCATGATTATTTTCCTCAAGGTAATCACTTGAAATTCTTTCTGACAATTCTCTCTGAAAATGAATGATGAATATGTATAAAAC	AAAGAACCGAACACAACACAATCACTTGGATAAGTAACTGCAAGGCTTCAGGAACCAGAACACATCCAGAGATTTCCCCTCTGTTTCATCAGAAACAGTAGTACTGTTCTCATCCATTGCTCCTAATGGCTTCTTCTCGTCACTGCTCTGCACCAGCTCTCTAAGAATTCCCCCCCTCTGCTGGTGAATCAAACAATAAC	ACAGAAGCGCACACAGATGA	59.966	20	100	100	TCCTGAAGCCTTGCAGTTACT	59.3	21	100	100	200	271	470	GAAGCGCACACAGATGAAACT	59.467	21	100	100	GGTTCCTGAAGCCTTGCAGT	60.538	20	100	100	200	274	473	AAGCGCACACAGATGAAACT	58.402	20	100	100	TGGTTCCTGAAGCCTTGCAG	60.538	20	100	100	200	275	474
PolynSSR_86	AAACAA	4|AHLA_contig_130201:136-559|+	2|SCEM_1.clean_(paired)_contig_153197:296-307|+	2|TWXB_1.clean_(paired)_contig_136043:349-360|+	0.94	0	0.99	TCCCAAACACCCGAGTGACAGTACTGGCGAAGAAGGAAGCTATCAACGCTGCCAGATAGAGCGAAGACGTGAAAGTAGTAAGCAGCTGAGAATCAAACTTGCAGTATTGGTTGGTGCTCTGGTTCGCCTGCTGCTTTCGGTAAACCGCTGGGAAAAACTTCCTCAGAAACGAATCCATAGACGTCACACCACCTTACAAC	ATCCATGTAAGCAAAATTCCCAAAAACTCAAAAAATGATTGGAGTTTGATGGAGGCTTTCAGTTACCGGAGATCCCGATGTCATAGCCGAAGATGAGTCCTCCAGTGGCGGCCACAAGGCATGTCAGGAAGACGAAAAGTGTCATCTTTCCGGGATAGTCCTTCCCTCCGGACGTGTTGACGATCGCTCCTCCTGCCATT	GCCTGCTGCTTTCGGTAAAC	60.11	20	100	100	CCGGTAACTGAAAGCCTCCA	59.676	20	100	100	168	260	427	CCTGCTGCTTTCGGTAAACC	59.478	20	100	100	CCGGTAACTGAAAGCCTCCA	59.676	20	100	100	167	261	427	GCCTGCTGCTTTCGGTAAAC	60.11	20	100	100	TCGGCTATGACATCGGGATC	59.111	20	100	100	189	260	448
PolynSSR_87	AAACAC	3|AHLA_contig_44025:240-657|+	2|SCEM_1.clean_(paired)_contig_58600:4471-4482|+	N/A	0.5	0.33	0.99	ACTTATAGCAGCACAGAACACACTACAAAAACAGTGGTCAAGAGTAATAGCATGTTTTTCCCAAGATAGATGAAAAGGATAACATCTCTTAGTTCTTATCAAAGAAAGATTTCAACAGCTAATGGAAAGGCAAATCCGAGAGCAAAACAAATTTGTACACATAGCAAAGGAAAGTTGTATGGACTTGACAAATACTACAG	AACAAAAGAGAAAGCTTTAATTTTCCCTATTCTGTTTTTGAGTCAAATTGATGAAAATATACACTAAAATCACCAGGGTTATAGCATATGGGTCTTCAGAGCAATGGGAATGACAACAACTTTTCTCGCAAAAATTATGTCAAACATAACTTCCAAACTGTAAAAAAGAATGCTTGCTGCTTCTTATAAGTAGGTATGCT	GGCAAATCCGAGAGCAAAACA	59.731	21	95.2	100	CCCATTGCTCTGAAGACCCA	59.671	20	100	100	198	328	525	AGGCAAATCCGAGAGCAAAAC	59.458	21	95.2	100	CCCATTGCTCTGAAGACCCA	59.671	20	100	100	199	327	525	AGGCAAATCCGAGAGCAAAA	58.09	20	N/A	N/A	CCCATTGCTCTGAAGACCCA	59.671	20	100	100	199	327	525
PolynSSR_88	AAACC	4|AHLA_contig_62235:238-657|+	3|SCEM_1.clean_(paired)_contig_5498:442-456|+	4|TWXB_1.clean_(paired)_contig_110225:3207-3226|+	0.47	0	1	TTGGATACCAATAGCTGGAATACTTTTCCCGTTGCCATTCTTCCTGTTGATCAGCATCAGAGAGCATCTTCTCCCAAAACTTTTCCACCCGGACTACCTTAAGGAATTGGATGCAGCCGAGTACGATGAAATTCCCGGTGCACCTCACCGTGACCACAGCCTCACATTTACGGTATCCTACTTCTTTTCCTTCTCTCTGT	AACACAAAATTTGGCTGATCGAGTTTTCATTAAAACATTATCAACCATGAACATTGCTATTTCTATTGCTATGCTGTGAGTGCAGGAAAGGGAAACATCTACATCTGGTGATGATGACACAGAAGAGGAGGAAGATGGGGATGAGGAAGTCTGTGATGCTGAGATTTTGGATGAGCTAACAACCAGGAGGGGTGAACTTA	GATGCAGCCGAGTACGATGA	59.969	20	100	100	TCCTGCACTCACAGCATAGC	60.108	20	100	100	198	309	506	ATGAAATTCCCGGTGCACCT	59.96	20	100	100	TCCTGCACTCACAGCATAGC	60.108	20	100	100	182	325	506	CGATGAAATTCCCGGTGCAC	59.901	20	100	100	TCCTGCACTCACAGCATAGC	60.108	20	100	100	184	323	506
PolynSSR_89	AAACTC	3|AHLA_contig_76197:133-550|+	N/A	2|TWXB_1.clean_(paired)_contig_37339:758-769|-	0.5	0.33	0.97	AACCCACAACAACTCATCCAAACCCAAGAAACCTCACCGTCACCTACAACTCTTTGCATCATCATCATCATCATCTGAATCTTCTCCCAAGCAACCAAACCGCCCACAGCCAAAACGCACACCCGGGGTTGACACCAGAATCCACTGGGACAACCAAGAAGAAGGCTGGCTTGGCCAAAAGTCAAAGCCTCAAAATTCCA	AAACCAAACAATATCTTGGTGAACGCTTTGCTGATCTTATCAACACTTCCTCTGCCACTCACTACCAGTACACTCTCTTCCTCCCTCTCTTATCTTCTTTATATTAATTAATAATTCTTACAAACTAATATTTGTTTTTTTTTTAATCATTAGATTCTTGGGAGTAACACCAGAAGCAGATATAGAAGAGATAAAAGCAG	GGGGTTGACACCAGAATCCA	59.596	20	100	100	TGGTAGTGAGTGGCAGAGGA	59.886	20	100	100	161	256	416	ACCAAGAAGAAGGCTGGCTT	59.52	20	100	100	TGGTAGTGAGTGGCAGAGGA	59.886	20	100	100	133	284	416	AACCAAGAAGAAGGCTGGCT	59.52	20	100	100	TGGTAGTGAGTGGCAGAGGA	59.886	20	100	100	134	283	416
PolynSSR_90	AAAG	3|AHLA_contig_108724:248-659|+	N/A	2|TWXB_1.clean_(paired)_contig_85699:914-921|+	0.5	0.33	0.97	AAATCTCCTAGGAAAAACAAGGTGAAAACCTGTTTCAACTACAAGTCCAGCATATGGACCAACAACCAGTGTTTTTTCAACCATGATTAAATTCCCTTCACTTGTCAAAGTTGTCGGTTCCTTAGCCTCAAAGATATTTTTTCCTCTCTCCATATATAATGAGCACAACAGCTCTCCATTATCATAAAAAAAACATAAAT	AGTAGGGCAACTCTGCACTCGCGGTGAGATTACCATCGTCCCCTTCGCCGACCACGGCCATGTATTCCCCGCCACCGAACTCGCTCACCTCCTCGCCTCCCGAAATTATCATGTTACCCTCCTACTCCCATCCTCCACCTCATCACCATCAACGGCCGCTCCCCACCCTCTGATCCACATCATAGGGTGCGAAGCATCCC	GTTGTCGGTTCCTTAGCCTCA	59.998	21	100	100	GCGAAGGGGACGATGGTAAT	59.894	20	100	100	151	309	459	GTTGTCGGTTCCTTAGCCTCA	59.998	21	100	100	TAATCTCACCGCGAGTGCAG	60.179	20	100	90	135	309	443	TGTCGGTTCCTTAGCCTCAA	58.656	20	100	100	GCGAAGGGGACGATGGTAAT	59.894	20	100	100	149	311	459
PolynSSR_91	AAAG	3|AHLA_contig_11783:331-742|+	N/A	2|TWXB_1.clean_(paired)_contig_81973:473-480|+	0.5	0.33	0.97	TTGGTACAAATACAGTCAAGACAACTAGAATCCGCTCTGGTTTCTACAATGAAGAGGAAAAGAGGACTGAAAGTCCTGATAAGATGATGGATATGAAGAACCGTACATTTGTTAGACAAACCTCTGCGATTTCAACAAATTATTTTTGTCAACATCATGAAACAGAGATAAGAAAGGAAATAATTAAAACAGAGGAGGTC	AACTCAGGCATAAGAATTATTTGTTAACAATGCAGTCAACAATACCCTTATCAACTATTCCCTTCTTCTAAGAGGCAACTTTAGATTGTGACCCTTTTCCTAGCCAGGGATTCTTTGCGTACCGCATCTTGGAATTGATCAAGTGTCATATGATCATCAAGCTCCTCATCAGTGGACATTTCCTCCTTTGAATCTTGAGA	ACCTCTGCGATTTCAACAAA	55.878	20	95	100	CTGGCTAGGAAAAGGGTCACA	59.649	21	95.2	100	200	319	518	ACCTCTGCGATTTCAACAAA	55.878	20	95	100	TGGCTAGGAAAAGGGTCACA	58.559	20	95	100	199	319	517	AACCTCTGCGATTTCAACAA	55.878	20	N/A	N/A	TGGCTAGGAAAAGGGTCACA	58.559	20	95	100	200	318	517
PolynSSR_92	AAAG	3|AHLA_contig_135727:755-1166|+	2|SCEM_1.clean_(paired)_contig_64685:1841-1848|-	N/A	0.5	0.33	0.98	TGCTAGTGAATTCATTTAATCACAAAACAAACCTTTTTCACATGTGTTGTCTTTTTTTCCCCTGGTTCAACCTCAGCAACCTAAAAATATCATCATATTATTATCTGTAAAAAAATACAAATTATAATAAATTCATTTTGTCACAACTGTCAACATAATTCTGCTCCAAAATTCCAAAAGAGTAGCAATGATATATATAT	TGATAAAGAGAGAGATGGAAAGGCAAGCAAATATTAACCTGATCACAAACGGGATCCGATGGTGGAGCTTCACTGATCACAGGCTCGAGCTTCTTTCCGCCGCTGATAGATGAGCTGGATTGATCACCAGCGGCCATCGCCACCATCTTCAGCGGTGCAACGTTATCGGTGGAGTCCTCAACCACCGCCATCAAGTCCTT	CCCTGGTTCAACCTCAGCAA	60.179	20	100	100	TGCTTGCCTTTCCATCTCTCT	59.368	21	100	100	182	259	440	TGGTTCAACCTCAGCAACCT	59.449	20	100	100	TGCTTGCCTTTCCATCTCTCT	59.368	21	100	100	179	262	440	CCCTGGTTCAACCTCAGCAA	60.179	20	100	100	TTGCTTGCCTTTCCATCTCTCT	59.959	22	100	100	183	259	441
PolynSSR_93	AAAG	3|AHLA_contig_151824:321-732|+	2|SCEM_1.clean_(paired)_contig_138675:444-451|+	N/A	0.5	0.33	0.96	AATCAAAAGGTTTTTTTTTTAATCCAATAATTTCAAGGAGATCCATGAAAAAGAACCTTATATATCTGTGTGTGCATGCATTATCATTGAGTAACATGATTATATTGCAGCATATTGTAGTACTGTAATTGAAGTATTGTATTATAAAATTAAAATTTATACAAAATCATATGCAAGTAATTAAAACTTTATTTATTCTA	AAAAAGAAGCTTGTGAAACAAATTCATCATCACCATCATCATTATTTTTTCTTACAGATTTTGGGAAGTTATTTGAAAATAGCAGCGGAACTAATGTTGGAGCGGCACCCGCTGCTACAACGGTGGAGTCAAAAAATGGGAATGGTGATGAGTCAAGTGGTGCTTCTTCTTCCTTCTCGGTCATTGTTAAGCACAGCTCT	TGCAGCATATTGTAGTACTG	52.826	20	95	100	AGTTCCGCTGCTATTTTCAA	55.657	20	100	100	199	305	503	GCAGCATATTGTAGTACTGT	52.821	20	95	100	AGTTCCGCTGCTATTTTCAA	55.657	20	100	100	198	306	503	TGCAGCATATTGTAGTACTG	52.826	20	95	100	GTTCCGCTGCTATTTTCAAA	54.888	20	100	100	198	305	502
PolynSSR_94	AAAG	3|AHLA_contig_15305:872-1283|+	3|SCEM_1.clean_(paired)_contig_5793:529-540|+	2|TWXB_1.clean_(paired)_contig_49296:1622-1629|-	0.47	0	0.98	ACTATCAACAACAAACAGTGTCTTCTACACTTTCAAGATCATTTGTGTCCTCATTGCAACACAAGCAATTAACCACTGCAGTTATGTAGCATGGATGGCAGTAATGTGCCATCTCATGGAATTTGCCAATTTGCTCTTGCACACAAACTAATGTCGCATGGTGGTGTAATTAAATCAATATAAACTATTGAAAGTGAGCA	ACAGAAATGATTGTAAATGTGATAATGAACAGCTAGAAAACCAAACAATCCCAAGATGTGCATAGCATCAACAATCATGGCATGATATAGAAAATTTCTTACCACTTTGATTATTTCCGAATTTTGGAATAGCATCCCCAATGACAACATGCAACCTAATAGATGGACTGTCACAGGCTTTTTGCAGTTCAAGAGCCCAT	ACTAATGTCGCATGGTGGTGT	59.997	21	95.2	100	TGATGCTATGCACATCTTGGGA	59.827	22	100	100	136	346	481	ACTAATGTCGCATGGTGGTGT	59.997	21	95.2	100	TGCACATCTTGGGATTGTTTGG	59.7	22	100	100	128	346	473	ACTAATGTCGCATGGTGGTGT	59.997	21	95.2	100	GCACATCTTGGGATTGTTTGGT	59.7	22	100	100	127	346	472
PolynSSR_95	AAAG	3|AHLA_contig_24644:1168-1579|+	2|SCEM_1.clean_(paired)_contig_55645:2304-2311|+	3|TWXB_1.clean_(paired)_contig_25999:520-531|-	0.47	0	0.83	GCACTAGGAGATACCGTGGAGCATGAATTCCATGGCCGTGTAACTCTCTGGATTTCCTTTGCCTAGTTACCACTCCCGTAGCACCCCAACCCACGGGTGTGGATGCCCTTGAACCTGACTTTCATGCATTCTATACATGGTTATAATGGTAGAAGTTAAATAAGAAATGTGTAAAGTAGCAGAATCTGCGAAATCAACAC	AAAAACAAAAACAAAAGAAAGCTTGGGTTGCCTCCCAAGAAACACTAGTTTTAAGTCATTAGCTCGACGTTTAAAATTTATCGAAGAATGAATCATGGAGGGTCTTCTAGATGGAAAACCTCTTTATCTGCCTTTAGGGGCAAATCACTTCTTATATACGGTTTAAGCCAATGTCCATTTACCCTGAATGTCTCATATTT	TGGATGCCCTTGAACCTGAC	59.962	20	97.5	100	GGAGGCAACCCAAGCTTTCT	60.541	20	100	100	148	299	446	GTGGATGCCCTTGAACCTGA	59.962	20	97.5	100	GGAGGCAACCCAAGCTTTCT	60.541	20	100	100	149	298	446	TGGATGCCCTTGAACCTGAC	59.962	20	97.5	100	GTGTTTCTTGGGAGGCAACC	59.326	20	100	100	158	299	456
PolynSSR_96	AAAG	3|AHLA_contig_36437:292-703|+	5|SCEM_1.clean_(paired)_contig_64294:2638-2657|-	N/A	1	0.33	0.7	ATATATATATATATATGATAAAACTAGTACCCCTACTTGTCTTTAAGCATCTCCTTTCTCTCTTTGCCATGACTTAAAGGCATACATAGCCTTAGACAAAGAAGACCTATTTGCATGTCCTAATGCCATTGAGAGAGACAACTCTCTCTTTCTCTTTTAGCAATTCAAGAAATAAGTATGTTCATTTGTTCCAATGAGGC	AATAAGGTGATGAAAAGGTTATGATAAAAGGAGAAGGAGAAAGCATGGTCTAGTTCTACACTTCTATTTCTTCTTCTTATTATAACTTAAAAAACATACATGTTTGGTCCTCTTCTTTGTGAGTCTTTAAGCTTAAGATTATCTTTAGCATGCTCTATAATTGTGCCTTTCCTAATATGCAAGGTACTCAAGGGATCATG	GCATGTCCTAATGCCATTGAGA	58.783	22	100	100	GACCATGCTTTCTCCTTCTCCT	59.762	22	100	100	150	312	461	GCATGTCCTAATGCCATTGAGA	58.783	22	100	100	AGACCATGCTTTCTCCTTCTCC	59.762	22	100	100	151	312	462	GCATGTCCTAATGCCATTGAGA	58.783	22	100	100	ACCATGCTTTCTCCTTCTCCT	58.726	21	100	100	149	312	460
PolynSSR_97	AAAG	3|AHLA_contig_52735:253-664|+	3|SCEM_1.clean_(paired)_contig_110957:1343-1354|+	2|TWXB_1.clean_(paired)_contig_98057:1316-1323|-	0.47	0	0.99	TCTGCTATATGGTCTTAACAGGTCTTGGGAGGCTATTTGAGATAATGATGCAGAAGAATACCTGTACGCAAGGAGTGAGATGGTTGCCTGACAACGTAACTTTCTTCAATGTGCCACCTATAGAGTCAACCCGAGGTCTCACAATTTCTTCCACAATGTCCGTCTCATCAAATGCATCGTTACTGAATTTTACCTAGAAA	AATGAAATGTCAAGCATGCTCATGATAACTTTGAACATGTGGCTTGCTCTTTTGTAACCAGAAAATGATGACTGTAAAGGTGAGAATACCAGTAGCGTGTGGGGAACATTATAAGATTCCTTGAAGAACAACCGGTTTTCTGATGGTGTTGGCCTGAATTCAGATATACCTTGAGAGACCTGACCCATCACAGAAGGAAG	AGAGTCAACCCGAGGTCTCA	59.887	20	100	100	ATGTTCCCCACACGCTACTG	60.036	20	100	100	200	321	520	GAGTCAACCCGAGGTCTCAC	59.756	20	100	100	ATGTTCCCCACACGCTACTG	60.036	20	100	100	199	322	520	GTCAACCCGAGGTCTCACAA	59.608	20	100	100	ATGTTCCCCACACGCTACTG	60.036	20	100	100	197	324	520
PolynSSR_98	AAAG	3|AHLA_contig_59698:947-1358|+	2|SCEM_1.clean_(paired)_contig_17601:4227-4234|-	N/A	0.5	0.33	0.93	CACTAGGGTCAGATCTGGCCAATGACAATTTGATCTGACAAGGGTCTGATCATTTCAAACCAACCGAATAGCAAGTAATGGTTTTGATCATTTCAAATAAAAAACCAAGATTTCATAGCTGGTTAAAAATGAAACAAAACACTGCATGGTAGGGGTTTATAACAGTTATAGTATTTGGATCAGTATACATGCCGAAAAAA	AAAAAAAAAGAAAGTCTCTAGTATAGCTCTATTACAAATAAGGTTCAACTGTGCGTTGTAGTTGCTTAAAATAATTCTTGTTTAGGGATAACATACCTCAACTGTATCAAGACACTCAAAGAATTCAACCTCTATATTTGCAGATATTGGTGAAGAGGCTTTTCTTAACCATCTTTGCATTTCGACTTCAATTAAATCTG	ACACTGCATGGTAGGGGTTT	59.223	20	100	100	AGCAACTACAACGCACAGTT	58.336	20	95	100	140	338	477	ACACTGCATGGTAGGGGTTT	59.223	20	100	100	AAGCAACTACAACGCACAGT	58.336	20	95	100	141	338	478	AACACTGCATGGTAGGGGTT	59.223	20	100	100	AGCAACTACAACGCACAGTT	58.336	20	95	100	141	337	477
PolynSSR_99	AAAG	3|AHLA_contig_79501:5953-6364|+	3|SCEM_1.clean_(paired)_contig_84689:809-820|-	2|TWXB_1.clean_(paired)_contig_139555:830-837|-	0.47	0	0.98	ACCTCCATCTAGTCCTTCTCAATCCATCCATAGGAGATCCAACACTAACCACCTTATTTTTTCCATAGGTCCCTCTTCTCCATGATATTAAAATGCTTGAGAGATATTAGAAGATCGATGGGATTGACGATAAGGAGGGTAGAGGGCCTGGCCAAGAGTTTGTATGAGAGAAGAAAAAATTGAAATGGAATAAAAAAACA	TTACCCTAGCAAAATCAATCTTGGTAGATTTGCATTGTGTCTTCGAGTTTGGAAGCAAAAGGGGAATAGGCACCCAAGAAAAATCTCAGTAGATATGCATTCCATGTCAGTGAAATTAAAGATTTGCACTGTGTCTTTGAGTTTAGAACCAAAAAATAAAGAGTATCTAGGCAAAATCTTTGTAGATTTGCATTCCATGG	GCCTGGCCAAGAGTTTGTATG	59.526	21	100	100	CTTGGGTGCCTATTCCCCTT	59.369	20	100	100	145	345	489	GCCTGGCCAAGAGTTTGTATG	59.526	21	100	100	GGTGCCTATTCCCCTTTTGC	59.176	20	100	100	141	345	485	GCCTGGCCAAGAGTTTGTAT	58.161	20	100	100	CTTGGGTGCCTATTCCCCTT	59.369	20	100	100	145	345	489
PolynSSR_100	AAAG	3|AHLA_contig_83215:1773-2184|+	2|SCEM_1.clean_(paired)_contig_105107:272-279|-	3|TWXB_1.clean_(paired)_contig_27911:272-283|-	0.47	0	0.98	AGAGAAGTGTGTAAGAGCTCCAACAAATTTAATGTATACAGATCTTTTTACTATAGTTCCAAACCTTTTCATCTTCCTTGTTCAACAGGTCACTGAGTGCAGGATGACTTAGAAACTGCAAAAGACAAACATCACAGTTGGTGAACAAACTTCAGCCTACCAAAAGCCAATGCGAGCAAAGGGAGCGCCCCAATAAAAAA	AATTTGCTTACAGCAGTCAACCAAAAGTCTTGAATGGACTCGATGATCTCATTCCGCTTGCTGTAGATGGGTTTGCGTATCTCACTATATTTCTGTTCCACTTCCAAAACCTTATCGCTTGCTTCCTCAGAAATCTATCAAGCAAATACATGCATGCACAGGAAAAAACAATTAATTACTAAAGAAACACAACCATAACT	AAAGCCAATGCGAGCAAAGG	60.038	20	100	100	ACGCAAACCCATCTACAGCA	59.964	20	100	100	128	362	489	AAAGCCAATGCGAGCAAAGG	60.038	20	100	100	CCCATCTACAGCAAGCGGAA	60.108	20	100	100	121	362	482	CCAAAAGCCAATGCGAGCAA	60.32	20	100	100	ACGCAAACCCATCTACAGCA	59.964	20	100	100	131	359	489
PolynSSR_101	AAAG	4|AHLA_contig_835:765-1180|+	4|SCEM_1.clean_(paired)_contig_49181:1820-1835|-	6|TWXB_1.clean_(paired)_contig_85748:964-987|-	0.94	0	0.98	ACAAGAAATGCTATATGTTACAAGGCATCTCCTGAAGTTAATAGAATCAATCCATTATTTGTCACACTAGGTTTCTTCATTGGAGTTCTTATCTCCAAGTGAAAATCATGAAATCTCATACAAATTCATGAAATTTAAAGATAGTTTCCTCATCCATAGGAGAATCTCAAAATGGAAAGTACCAAGCAGTTGTCGCACAA	AACGAAATCATATAAGTTCAAAAAAAATGCAAGATTTAACATGCAAATGCTTTGAGTCATGGATCCAGGTTTACTGTGATATATTTCTAATTTGAAAGATATTAGCATGCATATGCTATCACTATTAAGTCAGACCATCCATTATTGCTGGTTTGAGCCATTTAGAGAGCCTCCAATGGACACAAAAATAACTGAATTTT	CCAAGCAGTTGTCGCACAAA	59.9	20	100	100	CCTGGATCCATGACTCAAAGC	58.704	21	100	95.24	104	381	484	AGTACCAAGCAGTTGTCGCA	59.894	20	100	97.5	CCTGGATCCATGACTCAAAGC	58.704	21	100	95.24	108	377	484	CCAAGCAGTTGTCGCACAAA	59.9	20	100	100	CCTGGATCCATGACTCAAAGCA	60.356	22	100	93.18	104	381	484
PolynSSR_102	AAAG	4|AHLA_contig_84787:595-1010|+	5|SCEM_1.clean_(paired)_contig_158789:908-927|-	2|TWXB_1.clean_(paired)_contig_15445:1074-1081|-	1.25	0	0.98	NNNNNNNNNNNNNNNNNAAAGAAAAAGATGGCAGTCTCATAAAGAACATGAGGAAGGAGAAGAAAATGTGTGCACTAAGGTTTGTAAACTTGTTTTGAGATAGTTATTAACACGAGCAGCTCACCCACATTTATAGGCTAAAACAACAGGCATATCTTAAAGGTTGGAAAAATGAGATATTGAGATGTGATAGAGAAGCA	AATGAAAGAGAGGTTGAACGCGAAACATTAATCAACCATTGCATCCCCATACAGGCAAAGCTCAAAATCAGATATAAACATGATTAAAAAATTAGATTTTGAAGATTTTAGCAGGATTAGAACATGCAAAACTGATTCAACAATCATGAAAGAATCCAATGCAACTTAGTATCTCAAATATAGTAAATCTTAATTGCACA	CGAGCAGCTCACCCACATTT	60.957	20	100	100	TTGCCTGTATGGGGATGCAA	59.666	20	100	100	162	312	473	CGAGCAGCTCACCCACATTT	60.957	20	100	100	TTTGCCTGTATGGGGATGCA	59.666	20	100	100	163	312	474	CGAGCAGCTCACCCACATTT	60.957	20	100	100	TGCCTGTATGGGGATGCAAT	59.443	20	100	100	161	312	472
PolynSSR_103	AAAG	5|AHLA_contig_137149:159-578|+	4|SCEM_1.clean_(paired)_contig_43486:289-304|-	5|TWXB_1.clean_(paired)_contig_92684:359-378|+	0.47	0	1	ATTTTTGGGAAAACATGGGCTTGAGTTAAAATGGGCTTTCGGTATGACATGGTCCAGACGAAGTCACCATGGGCATGAATTAAAATATTTAAAAAAACTTATAATTATTGAACTTATAATTAAAAAAGGCAAACCAGATTAACTATTTATTGAAATTTTTTGAAAATCCAAAGATTTTTTATTTAAAAATAACACATAAA	GATTCTATGCAATAGGGGCACTAAATCATTTTGTGACAGTCAAATAAAACATGATTAATAAAGTTATAGTCTCAAAAAACATTTCATTCATGATAAACCACACAATCCTCAGGTAGCCAATGGCCAATGCAGCTCTCCATCAGAAGGCAGGTGTCCTTATAAAAATCTTAAGTCTGTTGAGCGCTGACTGAGTGTCACTT	CGAAGTCACCATGGGCATGA	60.393	20	100	100	TGATTTAGTGCCCCTATTGCA	57.339	21	100	100	190	216	405	CGAAGTCACCATGGGCATGA	60.393	20	100	100	AGTGCCCCTATTGCATAGAA	56.276	20	100	100	184	216	399	ACGAAGTCACCATGGGCATG	60.678	20	100	100	TGATTTAGTGCCCCTATTGCA	57.339	21	100	100	191	215	405
PolynSSR_104	AAAG	5|AHLA_contig_31980:110-529|+	N/A	4|TWXB_1.clean_(paired)_contig_88936:207-222|-	0.5	0.33	0.99	CAATTCCTACAAACGTCAAAACTATTCAAAAGAATTCCTGCAACTAATCATTGTCTTTAACAGTTGACATTTGGGTGAGAAAGAAGAGAGATGCTCTGTTACCTTTGTTGTGCCAGAAGATGGTGTTTGATGTTCACTACTTACAACAATCAAACCATCCACAACTATTCTTTCACCTGTTCATTGTCATTAGAATGTCA	TGCCCCCTTTGTTCTGTCAAAAAAGATTTTGTTTATTCAATTTCTTCAACTGTTTCTCAGACAAATATTCCTCCACCAGTTCATTGGCATTAATAATGTTAGCAACTGGGTGAAAGAAAGAAAGAAAGATACCGTGTCACCTTTGTTCTCCCAAAAAGATGGTTTTTAATGTTTGAATCCCTTTAACTGTCAAAAGCTGC	CCAGAAGATGGTGTTTGATGTTCA	59.48	24	100	83.33	GCCAATGAACTGGTGGAGGA	59.962	20	95	100	196	221	416	CCAGAAGATGGTGTTTGATGT	56.145	21	100	80.95	GCCAATGAACTGGTGGAGGA	59.962	20	95	100	196	221	416	ACCATCCACAACTATTCTTTCACC	58.99	24	95.8	100	GCCAATGAACTGGTGGAGGA	59.962	20	95	100	155	262	416
PolynSSR_105	AAAG	5|AHLA_contig_39526:1284-1703|+	4|SCEM_1.clean_(paired)_contig_23642:635-650|-	5|TWXB_1.clean_(paired)_contig_170607:441-460|+	0.47	0	0.99	AAACTGCAATAGAACAGTGATTCAGCTATAAAAAAAACAAAATCCATAATATATAACATTGCATTCTTTTACACAATATAAAAGAGACACATGGGGAAACAAAACATCAATAACCTTTTTCTTTTTCACATTTCATCACATCAGCTTAAAAGAGAAAAAAGAAGAACAAGAATTAGTAGTGGTTAATAATTGATTAACTC	AAAAAGTAGAGAAATACGGAAACTTCTTAACGGCATTTAGGGTTGTTGCCAGGTCCTCCAAAGTAGAAGAAGGTTCCCCAATCTTGATTAGAAGAACTGATGATATTATAACAGTTGGTATTCTCAGCAAGGGTGGAGATGGACTGGGCTGAGCTGAGACTGTTATCAGCGTCAACCAGTTCAAGGTTGCGGAAGTAGCT	AGACACATGGGGAAACAAAACA	58.63	22	97.75	100	ACTTTGGAGGACCTGGCAAC	60.179	20	100	100	200	284	483	GACACATGGGGAAACAAAACA	57.19	21	97.6	100	ACTTTGGAGGACCTGGCAAC	60.179	20	100	100	199	285	483	AGACACATGGGGAAACAAAACATC	59.961	24	97.85	97.92	ACTTTGGAGGACCTGGCAAC	60.179	20	100	100	200	284	483
PolynSSR_106	AAAG	6|AHLA_contig_103694:3743-4166|+	3|SCEM_1.clean_(paired)_contig_61259:2622-2633|+	N/A	1.5	0.33	0.99	ACAAGTTTTACAAATCAGAGAGAATTAACAACAAAAAATCAAAATAATTTTCTTGGAAAGCAGTCCAAATCCATGTACTCTAAAAAGAAAATTTCCGCCAACTACGAGTTATTAAAGCACAAATTTGCAATTTCAGGAGTCAGGACAATAGTCCATGTATACTTAACATTCCCTACTATATTCTCCGGTTGGTGAAAAAA	AGCATCTGAAGGAGATTTCATTTAAAAGATCTAAGAAAGCTAGAAAAGCATTGTTCTGTCCTAAACTCTTTTAATATGAACATGGTTAAATTATCATAATAACATTCGTATACCATATTTAACTGTGTAACAGGGTCCAGCTTACGCAAGCACTCCTGTTTGCTCTTTCATGATCTCAAAACTAGAGACTCTTCACACAA	CCCTACTATATTCTCCGGTTGGTG	60.021	24	N/A	N/A	GCTGGACCCTGTTACACAGT	59.603	20	100	100	195	370	564	TCCCTACTATATTCTCCGGTTGGT	60.141	24	N/A	N/A	GCTGGACCCTGTTACACAGT	59.603	20	100	100	196	369	564	CCCTACTATATTCTCCGGTTGGT	58.842	23	N/A	N/A	GCTGGACCCTGTTACACAGT	59.603	20	100	100	195	370	564
PolynSSR_107	AAAG	6|AHLA_contig_69900:232-655|+	N/A	5|TWXB_1.clean_(paired)_contig_22968:6456-6475|-	0.5	0.33	1	ACAAAGGATTCTGTTCACCAATCGACCAGGCAATAATAATTAATACAAGGTACAAAACTACTAAGGATCTAACCTTTATACAAAAATACAGAGCATTTTTATGTGCATAAATTCCGCATCTTGGCCTCAAGAATGGCTTTGGAAAAAAAAGGGAGCCCCTGCGGCTAAAATCAGCCAGAACATAAAATCCTGGCAACCAA	AAATAAAGAAACGTCCATTATTGTCTTCTCCCCTCACTTCAGCTCCTGGAGGAGTCAACCTTGTAGTAGAGTTCATTCAAGAATGGAAGATGCAAGATCAGGAGAAGATGACACACTGATGGCCTCTGCAAGCTTCAAAGCCATGGCAGCCTTGTAGGCTGCTAGTTCTGCATTAGCCATGTACAACTGCGCTCTAGAGC	ATTCCGCATCTTGGCCTCAA	60.034	20	100	100	TCCTCCAGGAGCTGAAGTGA	59.885	20	100	100	167	310	476	AATTCCGCATCTTGGCCTCA	60.034	20	100	100	TCCTCCAGGAGCTGAAGTGA	59.885	20	100	100	168	309	476	ATTCCGCATCTTGGCCTCAA	60.034	20	100	100	CTCCAGGAGCTGAAGTGAGG	59.464	20	100	100	165	310	474
PolynSSR_108	AAAGA	3|AHLA_contig_1765:1399-1813|+	3|SCEM_1.clean_(paired)_contig_73726:1202-1216|+	4|TWXB_1.clean_(paired)_contig_16812:1887-1906|-	0.47	0	1	TACCTGTGATCATTTTGACATTCACACCAAGGTTCAGTGCCCTTCGAATTGTTTCTGCACTATCATGTCTAGGAGGGTCAAATAGGGGCATAAGACCAATGAACTGCCAAGGACCTCCTGGACTCTCTTTCCTTCCTTCTGGAACTTCCTGTACATAAAAGAATACATGAGTAAAAACAATTTATTAATAAAAATAAAAG	GAAAGCAGGCAGAAGCCACAAATGAGCAGGATCTTGTACCTGATACGCCACCGCAAGCGATCGGAGCCCACGCTCAGCAAATTTGTCAATCACAGAATGAACTCTACGCTCTATTTCTAACTTATTATGGGCAAGGTTTAATATCTGCATTTCAGTCAATATAATCAATAAGCAACCAAAACAAGAGTCAGCAGGGCATG	GGAGGGTCAAATAGGGGCAT	59.146	20	100	100	CGGTGGCGTATCAGGTACAA	59.826	20	100	100	197	271	467	AGGACCTCCTGGACTCTCTT	58.911	20	100	100	CGGTGGCGTATCAGGTACAA	59.826	20	100	100	159	309	467	GGAGGGTCAAATAGGGGCAT	59.146	20	100	100	TGCTCATTTGTGGCTTCTGC	59.4	20	95	100	172	271	442
PolynSSR_109	AAAT	3|AHLA_contig_100809:1572-1983|+	2|SCEM_1.clean_(paired)_contig_38849:501-508|-	N/A	0.5	0.33	0.99	GATATGTTTTTTGCATTTGTTCATCATTTTCTCTTATAACATAATGGTTTGATACTTAGTACAATCTTGTGATAGAATTTTGATCATCTACAAACATTGACAAAAAGGAACTCTAAACCATCAGACTTTATCAGAATAATTACACCACAAAATGACTAATGAATGTTCACTTCTTATTAGCAATTTGCCATCTCAAAGTA	AAAAAATTCTATAGAGTTTGCTCACAAAAGATGTCATAAGCCTTATATTCAGCAAGTGAAGATATGTTTTGGCTTCATTACTGTTACCGAACTTGATTTCGATAATGATAACTTTATGTTCTCTGAATTTATTGATCAATTTCTCTCATTATACAATGATTTGATACTCAGATTCTTCTTACGATAGAACGCCAATCATT	GCAATTTGCCATCTCAAAGT	55.118	20	100	100	TCGGTAACAGTAATGAAGCCA	57.035	21	95.2	100	123	379	501	GCAATTTGCCATCTCAAAGT	55.118	20	100	100	GTTCGGTAACAGTAATGAAGCCA	59.002	23	95.7	100	125	379	503	GCAATTTGCCATCTCAAAGT	55.118	20	100	100	AGTTCGGTAACAGTAATGAAGCC	58.749	23	95.7	100	126	379	504
PolynSSR_110	AAAT	3|AHLA_contig_101947:3133-3544|+	4|SCEM_1.clean_(paired)_contig_34311:4829-4844|+	N/A	0.5	0.33	0.98	AGCTGACGTGGCTAAGTGGCTTTGGTGCCTGCTTGCACATCACATGCATTCCACTTTGCACCACAAAATCAACTTTAAGAACCAAATTTAGCCTCCCTTGCAAGATAAGCACAGCCCACACATATCCATAAAAATTTCACAATCCCCCACCTTATAAAGCACCACATAAAGATCATCTCCAAAAAGAAAAGTTCCTCCCA	AAAATAAAAAGCCACCACAACTACTTCAATTATACATAACATACATAACATGCATACATATTAGTAGCACACATACAGAGTACTTCACTATACTACAACTTCTTTAAAAGAACAACCACCACCTTCATACAAACCCTTCATTCATTCCTTCATTCCTTCATTCATTCATTCTCTCAGACTTTATCCTTTCTTCCATCACA	AGCACAGCCCACACATATCC	60.107	20	100	100	TGAAGTAGTTGTGGTGGCTT	56.979	20	100	100	133	307	439	AGCACAGCCCACACATATCC	60.107	20	100	100	TTGAAGTAGTTGTGGTGGCT	56.979	20	100	100	134	307	440	AGCACAGCCCACACATATCC	60.107	20	100	100	TGAAGTAGTTGTGGTGGCTTT	57.709	21	100	100	133	307	439
PolynSSR_111	AAAT	3|AHLA_contig_104004:1553-1964|+	2|SCEM_1.clean_(paired)_contig_32070:954-961|-	2|TWXB_1.clean_(paired)_contig_25718:987-994|+	0.47	0	0.86	TTAGACTTAATTATCCACACTTGGAATGACGATTTAATCCTTTCTTTTTTGCCTAAGAGGATCAAATGCTAAAGAGTGATGAAGTATCTTGCCCTCAAAAACCATGACAGCACGATCAAAATTCCTACTATTAATTCAAAATGAGTTTTATGATTTGAGTTGCTTTATTTTTAAAGAGACAAAAATTTAAGTGATTACTA	AAAAAGAGTAAAATCAGTGAAAAAATGTTAAAATCTTGAAATAAATTCCAATGGTTTTAGTTGATAAGATTTGGTATCACTTAGTATTTTCTTTCATGATTTTAGTAAATAATCAATCTTCATTAGATTGCATCATGAGATTTCAATAAAAGTTGGCTGTCTAAAGAGGAATAAGGTTTGACAATCCTCTATGTATATTC	Primers not available
PolynSSR_112	AAAT	3|AHLA_contig_106469:664-1075|+	5|SCEM_1.clean_(paired)_contig_47964:1882-1901|-	5|TWXB_1.clean_(paired)_contig_33677:1229-1248|-	0.94	0	0.99	GCAGGAATTAGGCACGGCCTAGCTACTTGGGTTGGGTCATATTAGGCCGGGCCGGGCCACAATCTGTCCCGGAACAGCCCATTATCTAGCACCAGCAGCACTTGGTCAGGGTCTCTCTAAAATTTCAAGCAGTTTTATAAAATTATGAAAAATCAGGAAATGCTCTGCAAAATTGAAAGAGTTCAGGGATGTATGTGCAA	AAACCACTTATACAAATATATAAAAGTTGGGGGAGGTCTTTGGCAAAAAGAAAAGAAGAAGGTAAGAGAAAACCCTTTTTCATAATTTTCCTTCTTTCGCTTCTCACTCGACTCATTCATTCCCTTGAGCGTTGATCTTTCTCTATCGTTCTTCAGCGACATGGCAACGCCGCCGGACACCAGCCTCCCGGCACCGCCAC	AGAGTTCAGGGATGTATGTGCA	59.16	22	100	70.45	GCCATGTCGCTGAAGAACGA	61.014	20	100	100	200	377	576	AGAGTTCAGGGATGTATGTGCA	59.16	22	100	70.45	TGAGTCGAGTGAGAAGCGAA	58.764	20	100	100	150	377	526	AGAGTTCAGGGATGTATGTGCA	59.16	22	100	70.45	GCCATGTCGCTGAAGAACG	59.579	19	100	100	200	377	576
PolynSSR_113	AAAT	3|AHLA_contig_107784:1074-1485|+	2|SCEM_1.clean_(paired)_contig_142861:737-744|-	N/A	0.5	0.33	0.7	ACAAGGATGAAAAATATAATATCAATAATTTATTTTAAAAAATAAATAAAATAAAATCCTACCTTTTTGAGTTCAAAGAGTAATCAAATCAAGTTGAAAAGAAGTGCATGGAGCCACTTTTCACTTGGTGACTTGAGCTATCACATTCCTGATTGAGTTTGCCTTTTCTTTGCTCTCCTCCACCAATAAATCCTTAAATA	AAAACTATTAACCATGTTATCTGAATATTATTTCAATTATTGTATAATATAAAATAAGTAGTTTATAATTAAAAATTTAGAACATTAGTGAAAGAAGAGTACTAGGGAGTCCATAAGTCTTGTGACAACTCTTTTGCTTGATTCTTGAAGTTCACCGGCAATTACAAGTTCGTCAAGGATGTAATATGCCTAAATCAATT	TCTTTGCTCTCCTCCACCAA	58.566	20	100	100	GTCACAAGACTTATGGACTCCCT	59.484	23	100	100	172	366	537	TTCTTTGCTCTCCTCCACCA	58.566	20	100	100	GTCACAAGACTTATGGACTCCCT	59.484	23	100	100	173	365	537	TCTTTGCTCTCCTCCACCAA	58.566	20	100	100	TCACAAGACTTATGGACTCCCT	58.209	22	100	100	171	366	536
PolynSSR_114	AAAT	3|AHLA_contig_113569:2743-3154|+	4|SCEM_1.clean_(paired)_contig_6939:3304-3319|+	N/A	0.5	0.33	0.96	TAGGGAATCCGACCGTTCTCGCGACCAGAATTTTGAATATGGGTGTTCTTCCCGAGAGGATAGTGGACACGTGGCTGTTACCAGCCAGCATATAAGGCTGCGAGGGAATCGGTTTCGGAAACGCTGACGCGGGGAAACGCGAGTTTGTGGTTTTGAGATAGTTTACAATGCACGGCACGCCAAACGGCCATTGTTTTGAA	TAATAAGCATAGTTTGAAATTTTCATTTTTTTTAATTAGTAATAGTATTTTTGAAAATTAAACGTTTCCTTTGTTTTTTCCAAGTTGTACCCCTCCATTGACTGAGATAAATTAAACCAATTGCACAATATATGTAGATCTGAATTAATCCCTTTTTACTGTTTAAATAGTACCATTTTTAACCACCTCATCATAATTAA	GCCAAACGGCCATTGTTTTG	59.414	20	100	100	TGGAGGGGTACAACTTGGAA	58.178	20	95	100	131	378	508	GCCAAACGGCCATTGTTTTG	59.414	20	100	100	CAATGGAGGGGTACAACTTGGA	59.959	22	95.5	100	134	378	511	GCCAAACGGCCATTGTTTTG	59.414	20	100	100	TCAATGGAGGGGTACAACTTGG	59.959	22	95.5	100	135	378	512
PolynSSR_115	AAAT	3|AHLA_contig_120381:379-790|+	N/A	4|TWXB_1.clean_(paired)_contig_107063:1216-1231|+	0.5	0.33	0.94	TATATTTTTTATTATCAAAAATGAAAAAATAATGAGTAAACTTATCTTTGCAAAACTCTTCAATTGCGTTTTTAAAAGAAAAATTTTGTCAAGTAGATTGGCTCGTTACATAACCTCTTTGTTGGCCTTATTTACTGAAGTTTGAGTTTATCGTTAACAATATTAAAATCTAATATCGAAGGGTAATAATAAACATAAAA	ACTAAACTCTTGAACTATTATTCTAAAACAAAAAATGCATCGAATTTTTGAAAATTTTCTACTGTCTTTCCATAAAACATATCATTATTCTTATTATTATGAAATCACATGCACCACTCGATTTTCTATAATTTCAGTTTGATTGAATATAAATACTAAAATAAATAGAAATAATGATTCAGCTATTTATGATTTTCTTT	Primers not available
PolynSSR_116	AAAT	3|AHLA_contig_123516:298-709|+	4|SCEM_1.clean_(paired)_contig_133584:1227-1242|-	3|TWXB_1.clean_(paired)_contig_19126:1254-1265|-	0.47	0	1	TAGGATCAATATCAGTGATTTTCCCCTTGTCTTCCGGAAAGTATTTACGGAGAACAGACTCATACTTATTGGGTTCAATGTAAAAAAAAGGAAATGCAGCTGCAAGGTCTTGCTTGGCTAAGTTTGGTATTGGCTTAACAATAATGTGATCAGGCTCAGACATAAAGATATATCTGCCAGGAAAGAAAAACATACAAAAA	CGAATAAGGTTAGATCATAAGGCTCAATTTAAAAAATAGTGTATCTTCCTCACTCTTCTTCAATATTTGCCTTCTGCAGCCACTGAACAAACGCCCAAGGCCTATTGAGAACAATGTACCCCTGAAATAATCGAGATTTCTCAGTATGCATTTAACATATAAAAACATATAAAAATATCAGGAAAATAATTCATTTCTAC	GGTCTTGCTTGGCTAAGTTTGG	60.03	22	100	100	CGTTTGTTCAGTGGCTGCAG	60.317	20	100	100	200	305	504	GGTCTTGCTTGGCTAAGTTTGG	60.03	22	100	100	TGTTCAGTGGCTGCAGAAGG	60.536	20	100	100	196	305	500	GTCTTGCTTGGCTAAGTTTGGT	59.377	22	100	100	CGTTTGTTCAGTGGCTGCAG	60.317	20	100	100	199	306	504
PolynSSR_117	AAAT	3|AHLA_contig_128010:669-1080|+	2|SCEM_1.clean_(paired)_contig_66160:1368-1375|+	N/A	0.5	0.33	0.99	TTAATCCCCATGAATTGAATGTCCTAATGGTTTCACCTTTTGACATTCTCTTGATGGTTTTGAGATTGTTCTTTTGGAGCCATGCTTTCCTTTGTTCTCCCCCTTCTGAATGCTAACTTGAATGCAATTTGGTAACTATTCCAATCTGGCTCCATGTTCATATCTGTGGATTAATTTGGCATCAAACCAATTGAGGGAAA	AAAGAAAAGGAAAAAAATGAAAATTTTACTATTGGTAAAGTCCACTTGCACCGCAATATTCATTTGTAATTGGATAAAGCCTTGCCAGCTCTGAAATTATAATAAAAAAACATTGTTACAGAAGATATTACAGGCCAAAGGCTTGACTTTATGGATGTCTACATATAGAGCAAGACACTGTATGACAATCACTGTCAGTC	TGGAGCCATGCTTTCCTTTG	58.74	20	100	100	TGCGGTGCAAGTGGACTTTA	60.179	20	100	100	193	274	466	GGAGCCATGCTTTCCTTTGT	58.739	20	100	100	TGCGGTGCAAGTGGACTTTA	60.179	20	100	100	192	275	466	TGGAGCCATGCTTTCCTTTG	58.74	20	100	100	GCGGTGCAAGTGGACTTTAC	59.763	20	100	100	192	274	465
PolynSSR_118	AAAT	3|AHLA_contig_129741:173-584|+	N/A	4|TWXB_1.clean_(paired)_contig_156024:756-771|+	0.5	0.33	0.98	GAAAGTGCAATCTTAGTAATATGATCGATATTCAATTGCAATATGATGAATATGATTGAATGAATAATCACTAGTACCTCTAAAAATTGACAGATTAATTAGTAATCATTTTTTATCTCTTATTCTTTCGAGTGTTTCAATATTTAGTTTATTCATCCCATTTCATCTCTGTATTTTATTAAACAAGTTGTTGTTTACCC	AAGATGTTTAAAATCATGATGCATAAACTCTTCACCATCTCGTTCAACTCATCATATTAATGCTTTTCATCAAAAAGTACGTACACTTGTTTGAAAGGCATGCATGCACAAGTTAAGTATATATGCGTACATACTGTACTAATCTAGCAAATACATGGACAATTATAACAGCTTAATAGTAAAAGCACAAGCTGTTCATC	TCATCCCATTTCATCTCTGT	53.692	20	100	100	TGCATGCCTTTCAAACAAGTG	58.176	21	100	66.67	164	324	487	TCATCCCATTTCATCTCTGT	53.692	20	100	100	GCATGCCTTTCAAACAAGTGT	58.175	21	100	71.43	163	324	486	TCATCCCATTTCATCTCTGT	53.692	20	100	100	TGCATGCCTTTCAAACAAGT	56.725	20	100	65	164	324	487
PolynSSR_119	AAAT	3|AHLA_contig_131456:252-663|+	N/A	2|TWXB_1.clean_(paired)_contig_152615:378-385|+	0.5	0.33	0.99	TTTTACAGGTTGTGATAAAAATTAAAAAAATAAACACTCCTCACCGTAAGCATGTGCATTGATTCATACATACTAATCCAACTTAAGATCAATTATTTATTGAGTCAGTAATAACTAAATCTTTCAACTTATATCAACATCACACACCAATGCTATTTCTCAAAACAAAGCAAGAAAATACATATTTATACAGAGAGATA	GAAATATTTTAGCAGGTATTAATTCACAATAAATGTCAAACAACTAACTCTGAACAAACCTTCACTTCAGTTGCAATATTTGACAGCATTTACCTGAGAGAACATGCACATAACACCATTTGGTTAATTTCTACATGCACAAAGTGAAACAGATATTTGAAATCAAATAAAGCATGAACCTTACTGCAGAAATATACATG	TCAACATCACACACCAATGCT	58.415	21	100	100	TGCAACTGAAGTGAAGGTTTGT	58.911	22	100	100	154	333	486	TCAACATCACACACCAATGCT	58.415	21	100	100	ATGTGCATGTTCTCTCAGGT	56.833	20	100	100	190	333	522	TCAACATCACACACCAATGC	56.916	20	100	100	TGCAACTGAAGTGAAGGTTTGT	58.911	22	100	100	154	333	486
PolynSSR_120	AAAT	3|AHLA_contig_1338:2719-3130|+	N/A	6|TWXB_1.clean_(paired)_contig_124744:827-850|+	1.5	0.33	0.94	TTTTTTGCTGGAAATTTAATTCTGAAATGAAGACATCGTTCATATTGGTAAAAAAAAAACTAAATAAAAATTCTCATTATACTATATTAGTACTAATTCTCTTTAGAATTTGGAGTTCCAATGAGAAAATATATTGTTATTGGAAAGGCACATATATAGCCTTAACTTTTTCACGTCCTGTGTAAACGTAAACATAAATA	AANNTAAATAAATACATAAATAAATATTAGAGTTGCGCGCGTGCGCTTCGATCGGAGAGCCAATTGATCGTGACCGTCGGATGGATCGGATATCGAGGCGTGCGTGCAGACAAAAAGAAGAGGGCGTGATGGTAAAAAGGGATGAGAGAGAAAGAGAGACTTGGCTTTCCATTACGAATCCTTGGAATGTTTCGGGTTTC	TCACGTCCTGTGTAAACGTA	56.561	20	N/A	N/A	ACGGTCACGATCAATTGGCT	60.036	20	100	100	119	370	488	CACGTCCTGTGTAAACGTAAACA	59.449	23	95.7	100	ACGGTCACGATCAATTGGCT	60.036	20	100	100	118	371	488	TCACGTCCTGTGTAAACGTA	56.561	20	N/A	N/A	CATCCGACGGTCACGATCAA	60.179	20	100	100	125	370	494
PolynSSR_121	AAAT	3|AHLA_contig_135223:631-1042|+	4|SCEM_1.clean_(paired)_contig_92146:479-494|+	N/A	0.5	0.33	0.97	GCCGGAAGCTGCCATTGCTCCTGTTGATAAAGATATAATCTCCACACTAGCGAGTTGGTATTAATCTCCATACCGAAAAAGAAATAAAGATACCAATCTCTAAATCGGAGAGTCAGTATTCTACTCCCTTGATAATCAAAAAAGGTCCAGAGTTGAAGGCTCTTCCAATTCAGGTGCCCTGTCAACAGTTTCCCAAAAAC	GATAATGTTAATAAAGAAAGGATAGAGACAGGACTTTTTTAAGCCTAAAGAATTAGCTACATAAATAATGAGACAAATCATGCTACAACTCATGGATTGGATACAATAATTGCTTGCAAGGTAACAAGCCATCCACCATCTTGCCAACGACATATATGTATGAAAATAAGAAAGGAATATAATGTAATGAAAAAAACAGG	AGGTGCCCTGTCAACAGTTT	59.741	20	95	100	TCGTTGGCAAGATGGTGGAT	59.672	20	100	70	191	371	561	AGGTGCCCTGTCAACAGTTT	59.741	20	95	100	CGTTGGCAAGATGGTGGATG	59.547	20	100	70	190	371	560	AGGTGCCCTGTCAACAGTTT	59.741	20	95	100	GCAAGATGGTGGATGGCTTG	59.541	20	95	100	185	371	555
PolynSSR_122	AAAT	3|AHLA_contig_135436:256-667|+	2|SCEM_1.clean_(paired)_contig_95029:1598-1605|-	N/A	0.5	0.33	0.97	AGTTGGATATAATTCTTGAGATATAATTTGTGCGTTGTTCATCCCTATTGTAATAAGGCTCCCATAACAAATTGAATCTTCTTCTTCTATACCACATTAAAGTGAAAATACTAACGAACCCAGCGAAGGCTACTATAGCATCTTCCTCTTCAAAATGTGTGCCCATCTATAATTCATATAATAATTGTTATTAACAACAA	AGTAATAATAATATGATATCGAAGATAAATCTTTGATTAGTGAATGTAGCCTACTTAATGAAATACTAACACACACAACTGTGGCATTAATATAACTCAACAAATTCTATAAATTGACTTTCCTTTATACAAATATATATCAGATGTTCTGTCTTGTGAAGTTTGTTGAGATATGTTTTAATTCCAAACTAGCCTAGTTA	Primers not available
PolynSSR_123	AAAT	3|AHLA_contig_13605:49-460|+	5|SCEM_1.clean_(paired)_contig_32035:6588-6607|-	5|TWXB_1.clean_(paired)_contig_57202:8102-8121|-	0.94	0	0.78	ATCAGAAACAAAGTAACACTAGTGGCTTACATTTTGAGATATTATTTGTTTTAGTTTTTAAAAATAGAAATTTATACTTTAAGCTCTTTGACCATGAATTTATTCATCTGAAACTTCTATCTAATATGACACATTTACATGCATCTAAGTGAGATAAAAATAAAATAAATAAAATAAATAATTTATGTAATTACAATTCA	TTTCCTAGTGCCACATGGGCAATGACCCTGGCTGCCAAAAGAGATTAGCCACAAAAATGGAAATTTTGAAAAAGGTGTGATTGAAGACTTAATGCATTCAGAACATGAAGGTCATGATATAACAAAAGAAAATTGCAAGAGGAGTTAGTTTAATCAACATCGCTGTCTGACCAAGGGACAAGACAAGGAACTTCCAACAC	CTTTAAGCTCTTTGACCATG	52.17	20	100	100	GTGGCTAATCTCTTTTGGCA	56.017	20	100	97.5	188	124	311	CTTTAAGCTCTTTGACCATG	52.17	20	100	100	TGTGGCTAATCTCTTTTGGC	56.017	20	100	95	189	124	312	CTTTAAGCTCTTTGACCATG	52.17	20	100	100	TTGTGGCTAATCTCTTTTGGC	56.783	21	100	90.48	190	124	313
PolynSSR_124	AAAT	3|AHLA_contig_14087:3428-3839|+	4|SCEM_1.clean_(paired)_contig_113045:1369-1384|+	N/A	0.5	0.33	0.99	AAATAAGCATGTTGATGATGCTTCATTATCCTGTTCAACATTTGTAATTGCTATAAAGATACAATCTTGAACTATACAAAAGTGACAAGAAAACAAATATCATTAGCAAAGCTCACTCATTGGCTGTATAGAATTTTGACCTTTTCTTTTTCCTTAATCTTAGCATGTAAGAGAACATCAGCACTCAGATTCTCAGAAAA	AATATGCAGCCAAGCTATGTTTCACATGATTAATGCTCAAGTAATGTTAACCTCACTTCAAGATATCACAGGGGAGCTAAACATACAAATTTGCTCCATTACAACTCCTTATGAGCAAGGATAAAAAGAAATGTTGTTTAGGATAAAAACATGAAAAAAGATATGCAATAAAAAAAAAGAACATATTCATCGACAGTGCA	GCAAAGCTCACTCATTGGCT	59.113	20	100	100	GTGAAACATAGCTTGGCTGCA	59.459	21	100	100	132	305	436	AGCAAAGCTCACTCATTGGC	59.113	20	100	100	GTGAAACATAGCTTGGCTGCA	59.459	21	100	100	133	304	436	GCAAAGCTCACTCATTGGCT	59.113	20	100	100	TGAAACATAGCTTGGCTGCA	58.092	20	100	100	131	305	435
PolynSSR_125	AAAT	3|AHLA_contig_143057:350-761|+	2|SCEM_1.clean_(paired)_contig_34601:683-690|-	3|TWXB_1.clean_(paired)_contig_126665:1070-1081|+	0.47	0	0.9	CACTTGATTGGGCAAAGTATCGAGGGTAAAAGTTTTATTATTTCAAACGGGCCAATCGAAAAGTGTTGATATTGTGGAGACGAGGCACTTTTAGAGCATAGTGACCTTAGGAGACTTATTACACCATTGTTCAAGAATTAGTAAAATAAATTTGATAATTTCATCAAGTTCTTGTTTTCATTGATAATTTCTTATTAAAA	CATAATTTATTAAAAATTGAAATAAAACAAATTACAAGAGGCAAATGAGAGAAAAAAACATAAGGGATACACACGATCATGATCATGATCACTTGAGGAAAGAGAGAGAACAACAAAAGATTCTCCACTAAAAACTTAGCATAAAGCAAGAACAAAAAGTGTAGGAAACACAGAAAACCAAAAGGAGTGCGATAAATGGG	TGTGGAGACGAGGCACTTTT	59.532	20	100	100	TTCTCTCATTTGCCTCTTGT	54.568	20	95	100	193	272	464	TTGTGGAGACGAGGCACTTT	59.532	20	100	100	TTCTCTCATTTGCCTCTTGT	54.568	20	95	100	194	271	464	ATTGTGGAGACGAGGCACTT	59.313	20	100	100	TTCTCTCATTTGCCTCTTGT	54.568	20	95	100	195	270	464
PolynSSR_126	AAAT	3|AHLA_contig_1458:287-698|+	4|SCEM_1.clean_(paired)_contig_18106:1324-1339|+	3|TWXB_1.clean_(paired)_contig_157426:335-346|+	0.47	0	0.78	AATTTCGACGGAGAACTCGAAGGTGTATTTATCTTGGCATTTTCGTCTCCGGGGCCGATTTCGACATCGACACAAGCCGACGATGATTTCGCCGGAGTTTTGCTGCAATTCAACTTCAAGTACTTGTTTTTAGCCCTCTTCACTCTTCTTTTCTGCTTGAAAGCCATTGATCATACAATGCCTCTCATTTCTGCACATTA	TCCATTCATCATCATGTTGCAGAAAAAGAAAACATTTCTTTATGAATTTCTGTTACTAAACAAATAAAACAGAAAAGAAATAATCCAAACAAAACAACATAAAAATCAAATGGAAACAGAAAAACAAACCTTCTTAAAATCCTGAAGATATAAAAAATAATCATTTGAATCTAAGTGAAAACAGAAATTAATTATCAACT	CTGCTCTCAATTCATCATGATGCA	59.724	24	100	100	ACTCCAGATGATTTTGAGCCACA	60.245	23	100	100	173	8	180	ACTGCTCTCAATTCATCATGATGC	59.724	24	100	100	ACTCCAGATGATTTTGAGCCACA	60.245	23	100	100	174	7	180	CTGCTCTCAATTCATCATGATGCA	59.724	24	100	100	CTCCAGATGATTTTGAGCCACA	58.65	22	100	100	172	8	179
PolynSSR_127	AAAT	3|AHLA_contig_14676:1807-2218|+	5|SCEM_1.clean_(paired)_contig_5600:3595-3614|-	5|TWXB_1.clean_(paired)_contig_158558:1396-1415|-	0.94	0	0.97	TGAAAGGAGTTCTTTTCTTCCCTGTCAGTAATGAAACAATTATAGTTATAGATAAAAAAGAAAATTCAGTTGAGATTCTTCATAAAATTTATCTCAATAATGCCAACACAATTGATTGCAGGAATGATAAACAGAGGATAAACTTTATGCCTCTTGAAAGGTTTTGAAAGGAACATGCTACGGAAAGTTTTGGCTTCTCA	AAACAAATAAAACTAAAAACCATTTTAATAATGCACACATCAAATGTAAATAATCACAATAAGAGGCAATTTTCCTGATTGAAATAATCTTTTACCAGGGAGAAATTATCACTTAGCAAAAGAAAAGTAGCATACAAATTATAGTACACTGCATGCCAAGTAAAGAAAATGAAATTCAATTCCCTGGAGAATGTACCTGT	TGCTACGGAAAGTTTTGGCT	58.024	20	100	90	ACTTGGCATGCAGTGTACTA	56.85	20	100	97.5	198	375	572	TGCTACGGAAAGTTTTGGCT	58.024	20	100	90	TACTTGGCATGCAGTGTACT	56.85	20	100	100	199	375	573	CATGCTACGGAAAGTTTTGGCT	59.771	22	100	90.91	ACTTGGCATGCAGTGTACTA	56.85	20	100	97.5	200	373	572
PolynSSR_128	AAAT	3|AHLA_contig_14833:1618-2029|+	N/A	2|TWXB_1.clean_(paired)_contig_52835:437-444|+	0.5	0.33	0.99	AAAACTGAGACTCAACTTCCAAATTCCTTAATGCAGCATTTGAAATCAGATCAATTGTTTCAAAAGAGCTGGGATGGAACAGCGCTTCTAAAAAGTATATGAAGTTTTACCGAAATTTTTTCATCTATCATATCTTGTTTTTCAAATATAGGATACTTTCAGAAAATTTGCCATTAAATCTGAAGAAAATGAAGGGCCAC	TACAATCTTTAAGACATCAAAGGTCTTTATAGAATTTCGACGCTCCATGCCCTTCATATTCCATTTCCTTTTGGCCTATTTAACTGAAACTATCTTTCTAGACTTATTTCAGCAGCCATCTGAGATACTTTTTCACAAACTCTTTCATGTTCATTTTTATTTTACCTAGTTTATTTTAATCTTTTGAACATCACATAATG	CTGAAGAAAATGAAGGGCCACA	59.107	22	100	100	AGTATCTCAGATGGCTGCTGA	58.324	21	100	100	162	379	540	TGAAGAAAATGAAGGGCCACA	58.044	21	100	100	AGTATCTCAGATGGCTGCTGA	58.324	21	100	100	161	380	540	CTGAAGAAAATGAAGGGCCACA	59.107	22	100	100	AGTATCTCAGATGGCTGCTGAA	58.963	22	100	100	162	379	540
PolynSSR_129	AAAT	3|AHLA_contig_149496:274-685|+	4|SCEM_1.clean_(paired)_contig_53070:675-690|-	N/A	0.5	0.33	0.72	CGGAATTATCATTGTTTATATATTTCTTAAGTTATTAATTATTAGTTGGGATGCATAAATACAATTTTTACAATCAAAGCTCACAAAGATCAATCACAACTAGACGACGCTCACCTAATTTCTTTTTATAAAACTGTGCATGATTCATTCTTATATTTGTGAAAATTTTCTTTTTAGTTTAAATAATAATTTTTAAATTA	GTAAAAAAACTTGTAGCTGAGTGACACTCTAGTCCTATTGATCTAAATAAAACATGAGTTCGACTCCGGACTCTCAAAAGAAATATAAGCTAAAAAGATGAGAGCGTGGGATAGAGTAAACATGGTTTTTTATCCGTTCATCAAAATTTGATCAAATCTAATTTCTATGTTAAATAAACAAATAAATATTACACTAGAGT	ACAACTAGACGACGCTCACC	59.76	20	100	100	AGAGTCCGGAGTCGAACTCA	59.964	20	100	100	191	295	485	ACAACTAGACGACGCTCACC	59.76	20	100	100	TGAGAGTCCGGAGTCGAACT	59.964	20	100	100	193	295	487	CAACTAGACGACGCTCACCT	59.478	20	100	100	AGAGTCCGGAGTCGAACTCA	59.964	20	100	100	190	296	485
PolynSSR_130	AAAT	3|AHLA_contig_152191:101-512|+	N/A	2|TWXB_1.clean_(paired)_contig_142589:2253-2260|-	0.5	0.33	0.97	TTAATATTTTAATTTTATAAATACATTGAAAATAATTATTAATTATATTAATCTTTAGGTTTCAAATCATTAATGAAAATTTTAATATTTTCATAATTTCAGATATAAGTAATAGATTCACCGCCCCAACTATCAACAGTAAAAACGTATGACTTTGATGTCAAATAAAATCATTAATTTTTAATAAATACATAATCGAA	ACACTTTTGTCCAGTCAGTACGTTGTCAGGTCATGCACAATTTGTTGAAAAAAATATATAATTCCAAAATGAGAACGCTTTTTCAGTGCTAGTACCAGTACTTCATTAATGTGACATATTGATTCCCACAAAACAAAACATTTTTCAAATCAAATAAAAAGCATCTTACAAAAGGGGAGGTGCACTTCTCCTTCTCGTAT	CCGCCCCAACTATCAACAGT	60.035	20	N/A	N/A	TGTGCATGACCTGACAACGT	60.179	20	100	90	131	220	350	ACCGCCCCAACTATCAACAG	60.035	20	N/A	N/A	TGTGCATGACCTGACAACGT	60.179	20	100	90	132	219	350	TCACCGCCCCAACTATCAAC	60.036	20	95	100	TGTGCATGACCTGACAACGT	60.179	20	100	90	134	217	350
PolynSSR_131	AAAT	3|AHLA_contig_15227:1810-2221|+	4|SCEM_1.clean_(paired)_contig_49742:258-273|-	4|TWXB_1.clean_(paired)_contig_18676:902-917|+	0.47	0	0.97	AGGCTTCATTCCTGCCAATATATATATATGTATATCTTGAGTGATTTGATTGCATAATTATATATATAATTACAGAGTTTTTAAGCATTACCCTCAGCTATGAGTTCATTGATGAGATTATTATAGAACTCAATACCCTTCTTATTAATTCCTCCACTTAGACTTCCAGCTGCCATATATAAACTTACCATGAGTCATTA	AAACAAAACTCATTAAAGAAGCAAAGTGTTAAAAAAGGAGAACATAGAGGAATGATATGCATACTTGGTAGAATCCTTGGCCAAGAGATGGAAAACCTAAATGCATCCATGTTCAAGCTCTTCAAAAGCTTCACATCCTCCTACAACCCCACTCCCAGATTGCTTGGATGATGAGTTATAATTAACCAACAAATTAAGCT	CACTTAGACTTCCAGCTGCCA	59.998	21	100	100	TTCCATCTCTTGGCCAAGGA	58.629	20	100	100	151	354	504	CACTTAGACTTCCAGCTGCCA	59.998	21	100	100	TCCATCTCTTGGCCAAGGAT	58.4	20	100	100	150	354	503	CACTTAGACTTCCAGCTGCCA	59.998	21	100	100	TTTCCATCTCTTGGCCAAGGA	59.29	21	100	100	152	354	505
PolynSSR_132	AAAT	3|AHLA_contig_154633:23-434|+	2|SCEM_1.clean_(paired)_contig_128742:244-251|+	N/A	0.5	0.33	0.98	AATTTGTTTCAATTTTAACCAAAATTCACTATGATGTAACATGTTTTGTCCAAATAAAATCAATTCAAACTACAATTTACTTAAAAATTTAAATATAAAAAATCATTAATCTTATAATTTATTTCAACGTAGCAACAGCAATAGCTTATTAGTACTCAAGAATACTTGTTAAATAAGAATACTTGTTGCCCATTCAATTA	AATTTCAACATCAACCAAACAAGTTTGGCAAATCAGTGTCTCCTCCTTCACAGCAAATACCTAAAAAAACACATCAAAGTTTTGGTGCTATTAATGCACATTCAAAGTCAATATCTTCAAAGAATTAAACTCTTTTATTTTCTGTAAAACAGCTTGATTTGCATTTGTCCAAAGAAAAATCTTCACTTGTATAACAAATC	TCAACGTAGCAACAGCAATAGC	59.585	22	95.5	100	TGCTGTGAAGGAGGAGACAC	59.318	20	100	100	144	145	288	TCAACGTAGCAACAGCAATAGC	59.585	22	95.5	100	GCTGTGAAGGAGGAGACACT	59.027	20	100	100	143	145	287	TCAACGTAGCAACAGCAATAGC	59.585	22	95.5	100	GGAGGAGACACTGATTTGCCA	59.996	21	100	100	135	145	279
PolynSSR_133	AAAT	3|AHLA_contig_15629:113-524|+	N/A	4|TWXB_1.clean_(paired)_contig_79671:307-322|+	0.5	0.33	0.98	ATCCCTCCAACTCTTTCAATTCTCAAGTAAATCCTTTTAATTTATCAAATCCCAAAACATCTTTGTTTTCAAAAATATTATTTTTAAATTCAAATTACACTATAATTATAAAATTATCCCTACTTTAACAGTGGCAAGGCTGGTGCTAAGGATATTTTTCAGGATATTTTTAGCATTCTATTAAAATATTTAAAACCAAC	AAGTCAAGAGAAAAAAAACCTACATAACCAGGATGACAATGTAAAAGAGCTTTTAGTCATTTGTTGGTCAATATATTAAATATTAGAGGTGAAATATCAATGTACAAACTCAGTGAGAATTGCCACACTTGTTCCTTGAGTTTAGCTGTAAAACAGGGCGACGATGATCATCTCTCATCAAAAATATGATCGTCTTCTTC	TTAACAGTGGCAAGGCTGGT	59.815	20	100	100	GCTCTTTTACATTGTCATCCTGGT	59.298	24	N/A	N/A	138	236	373	GCAAGGCTGGTGCTAAGGAT	60.395	20	100	100	GCTCTTTTACATTGTCATCCTGGT	59.298	24	N/A	N/A	129	245	373	TAACAGTGGCAAGGCTGGTG	60.537	20	100	100	GCTCTTTTACATTGTCATCCTGGT	59.298	24	N/A	N/A	137	237	373
PolynSSR_134	AAAT	3|AHLA_contig_16960:3289-3700|+	2|SCEM_1.clean_(paired)_contig_18997:2721-2728|+	3|TWXB_1.clean_(paired)_contig_150312:688-699|-	0.47	0	0.98	CTAAAACTTGAGAAAAGACTTCAATTGTGGGTATCACACCAGCAGCAATTGTTTCACGATAGGCCATTATTGAGCGGGATGTCCTGTCAAATACCAATAAATATTGCAAACAAAAAGTCAAATCAACCTGAGGAAAAAATTTTTGCCACACAGGGTAACTATTTAAATAAGTATATGCCGCATAAGATGGTGTATTTAAA	AACTGCATTGCATAATAAAGTTCAATTTTAGGGGAAAAAAAGCTCACTAATGCCAGAGCCAGTTTAGGGTATTCCAAAAGAAAAATTGTAGTACATTAATGAAGTTTGATTGCAGTAAAAGATGACTCATTAATGCCATAACAGGGTCAGGCAAAAAGGATTCAGCATCTAAGAACAGTTCACTAAGAGCAGACCAACTT	GAGCGGGATGTCCTGTCAAA	60.036	20	97.5	100	GCTCTGGCATTAGTGAGCTT	57.964	20	100	100	200	271	470	GAGCGGGATGTCCTGTCAAA	60.036	20	97.5	100	GCTCTGGCATTAGTGAGCTTT	58.636	21	100	100	200	271	470	AGCGGGATGTCCTGTCAAAT	59.379	20	97.5	100	GCTCTGGCATTAGTGAGCTT	57.964	20	100	100	199	272	470
PolynSSR_135	AAAT	3|AHLA_contig_19024:1200-1611|+	2|SCEM_1.clean_(paired)_contig_132479:1827-1834|-	N/A	0.5	0.33	0.99	CAAATTAAAGCAATGTAAACACACTTGTTGACCTTGATAATTATTAGATAATTATCTTTTTTTTTAATTAGTCAATAGATACTTAACCTAGTGTGTTTTTTAAAGTACTCATGTTATTTACTTAATTACTTCTACTCAATTCTAGTACTAAGGCTAATCTCAAAAGCATCAACTTTTTGGCATGTTAAAATAAAATAAAG	TACACAAAGGTAATGTGTGTTAGATTCCTTTTAAAGATCCTTCCTCAAGATGATCTCTTCTTACCCTTTGAGCCATGTAAAAGGGTAAGGGCATATGGCCAATAGAGATAGGACCACCATAACAAGGTATTAGATTATAGGACCTACTTAATGCCAAAGGTGGGTCCTAGTTGGCTCATGATTCCAAATTCTTGCAATCA	GGCTAATCTCAAAAGCATCAAC	56.038	22	100	100	GCCCTTACCCTTTTACATGGC	59.245	21	100	100	153	351	503	GGCTAATCTCAAAAGCATCAAC	56.038	22	100	100	GCCATATGCCCTTACCCTTT	57.618	20	100	100	160	351	510	GGCTAATCTCAAAAGCATCAAC	56.038	22	100	100	GCCCTTACCCTTTTACATGGCT	60.623	22	100	100	153	351	503
PolynSSR_136	AAAT	3|AHLA_contig_21136:56-467|+	4|SCEM_1.clean_(paired)_contig_75948:202-217|-	N/A	0.5	0.33	0.97	AGACACTATATCATTAATATATGTTTGGGGAATGTTTTGAATCTTCGAGTGGGAAATTGTAACACGTGAAGATTCAAAAAGGAAAAAAAAAAAGAAAAAAGGAAAATATGATGTTTTAGATTAAATGTCTATTTTACCCATTATATAAACCTTATTTTTTATGTGCTAGGTGGAAAGATTATAAAATATTAGAAATTATA	ATATATATACTTCACCACTCTAATTCTTCAAACACCGTCGTGACTTTTGAGTGCCAATATGCTGGATCACCTTGATAACCGAACTATGTTAAGTCATTAGTCTCTTTTCATTGTTCATATTGTGTGTGCTTCCAATCTTGTAGATTTGAAATTTTAAGCAGTGTTTCACCTTCAATAAATGTTTTAGTAGGTAATTAAAC	ATGTGCTAGGTGGAAAGATT	54.303	20	100	100	TGGCACTCAAAAGTCACGAC	58.704	20	94.7	95	108	215	322	ATGTGCTAGGTGGAAAGATT	54.303	20	100	100	CTCAAAAGTCACGACGGTGT	58.432	20	N/A	N/A	103	215	317	ATGTGCTAGGTGGAAAGATT	54.303	20	100	100	CACTCAAAAGTCACGACGGT	58.432	20	N/A	N/A	105	215	319
PolynSSR_137	AAAT	3|AHLA_contig_2212:197-608|+	4|SCEM_1.clean_(paired)_contig_91182:2791-2806|-	2|TWXB_1.clean_(paired)_contig_44945:2261-2268|-	0.82	0	0.99	ATCTGAGCACAGTCAGATATTTTGAACATTTCTAGCACAACCAGTTATGTTTGAAGTTATAATAAATTAAAAAAATCATATATCTCCACCATTAATGTCTTTTGACAAATAATGGAATTCAAATTACAAAACTGCAATAGATCCCTCTTAATCGAATGCCTTTTAATAGCTGGTTTGTCAGCAGTGTTTCACAAGAGACA	AAAGACCATAACAATGGCCAAGCCATAAATCCTATATTAGGACTTTTTGGTCGGCAATGTCACCCCAGACAGCTCTTTTAGGATTGCCTCTGTTAACATGACTGCCCAAAAATCTATTTGTCTACACCTACAAACATAAAGAAGACAACTTATAGTAAAAACTGATGCATTAACTCAATTAAATGGTCTGCCCATGGAAA	GGTTTGTCAGCAGTGTTTCACA	59.837	22	95.5	100	AGCTGTCTGGGGTGACATTG	59.963	20	100	100	115	367	481	TGGTTTGTCAGCAGTGTTTCAC	59.837	22	95.5	100	AGCTGTCTGGGGTGACATTG	59.963	20	100	100	116	366	481	CTGGTTTGTCAGCAGTGTTTCA	59.577	22	95.5	100	AGCTGTCTGGGGTGACATTG	59.963	20	100	100	117	365	481
PolynSSR_138	AAAT	3|AHLA_contig_23550:794-1205|+	2|SCEM_1.clean_(paired)_contig_54436:5174-5181|-	2|TWXB_1.clean_(paired)_contig_89418:5861-5868|-	0.47	0	0.99	TCAATGGACAAGTACACACATATTATAGGATTGTACCAAGATTATCTAAATTTGAACAGCTTATAACATCAGTTATCTTGATTTCTGCTCTCACGTTAGACCCAAGGCTTATCATTCATATTTACTTTTCCCCTGATTACATGGAAGCCATATCTTTAGCATGCAATGGAGCAACCACCATCGATATGTGCATCTGAAGG	GGTCATGGTCCCGTTTTATGTACATAGACATCAACAATGCTTTGTCCAAATCTAGTGTCACAACAGTTCATTTACATCAAGCATATGTCAGATCTCGTGGACTAGCTATAGAGGTACACCACAATGTAACATTGGACAAGAAAACTTAAGATTGATTCATTGTTTAAAATGAAGAGATATAATAGTAGGTGCATTGTAGT	GCAACCACCATCGATATGTGC	60.002	21	100	100	GCTAGTCCACGAGATCTGACA	58.982	21	100	100	148	370	517	TGGAGCAACCACCATCGATA	58.8	20	100	100	GCTAGTCCACGAGATCTGACA	58.982	21	100	100	152	366	517	CCCCTGATTACATGGAAGCCA	59.785	21	100	100	GCTAGTCCACGAGATCTGACA	58.982	21	100	100	189	329	517
PolynSSR_139	AAAT	3|AHLA_contig_26209:918-1329|+	N/A	2|TWXB_1.clean_(paired)_contig_113034:376-383|-	0.5	0.33	0.81	TTGTTGCACTTATTTTTATAAGACCGCAAAATTATGTCCATGCATGCCACCAATGTCCTTGAAAAATTTAGGCTGTAATATGTGGTTTGAGATTAAGCTTTTGACGTTATTGTTTGAAATAAAACTATCTTCTTCATTTATGTGTGGGGTACTCCTTTTGTATTCAAACAAGAAAGTCTTCATTATTTAAAGATTTTGAA	TTAACATTTAGTTGTAGGGGGTGGGGGTTGTTTGTTACATAGAGACCCAAAATCCAAGTTGTGACAAGTACAAATACACCAATATTGTTAATTTCTAAATAATATATACACATACAAAATACACAAACATATATATAATAACTTTGCTAATATTATGTACTTCATTTCCTCTGTATTCTGTTTCCTGTAAATGGTCCAGG	TGTGTGGGGTACTCCTTTTGT	59.152	21	100	80.95	TGTCACAACTTGGATTTTGGGT	58.63	22	100	100	138	340	477	TGTGTGGGGTACTCCTTTTGT	59.152	21	100	80.95	GTCACAACTTGGATTTTGGGTCT	59.363	23	100	100	137	340	476	TGTGTGGGGTACTCCTTTTGT	59.152	21	100	80.95	TCACAACTTGGATTTTGGGTCTC	59.111	23	100	100	136	340	475
PolynSSR_140	AAAT	3|AHLA_contig_26320:671-1082|+	3|SCEM_1.clean_(paired)_contig_75023:726-737|+	4|TWXB_1.clean_(paired)_contig_159074:410-425|-	0.47	0	0.97	CCCTCGGTGATGCTGTTTTAGACGGTATTGATTTCGATATCGAGGGTGGAACTACCCTTCACTGGGATGACCTTGCTCATTTGCTCTCCCAGTATAGTCTAAAAGGGAAGAAGGTGAGCGGTAAAAAATAATAATTAAAGAGAAATGAAATACTAACTCTCTATTATTATATATGCTATACAATAAATTAGCTTGGTTAA	AAAACTGTTATAAATACAGTGCATGCATGTAGTGCAGCAGAAAAGAAAAGTGCAGATAAAAAAAGAAAAATTGGAATGGTACAAAAAGCATGGATGCATGCAGATTGAACCGATGGCAGGACTTTAAAGAAATGATTATCCAAAAGGTCATTAATTAATCCATGATTGCTAGCTCTCTCTGTTAATCCAAAGCTTCAAGG	AGGGAAGAAGGTGAGCGGTA	60.252	20	100	100	TGCACTTTTCTTTTCTGCTGCA	59.834	22	97.75	100	163	303	465	GGGAAGAAGGTGAGCGGTAA	59.388	20	100	100	TGCACTTTTCTTTTCTGCTGCA	59.834	22	97.75	100	162	304	465	AGGGAAGAAGGTGAGCGGTA	60.252	20	100	100	GCACTTTTCTTTTCTGCTGCAC	59.463	22	100	90.91	162	303	464
PolynSSR_141	AAAT	3|AHLA_contig_27070:349-760|+	2|SCEM_1.clean_(paired)_contig_114545:399-406|-	N/A	0.5	0.33	0.99	GTTCATTGGTATTATGTAATGTTGTATGACAGTGATTAAATAATTCAAGATGGGCTTGTGGAGAACTTTATGCGATTATTCTTTCAAATGATATTGTACACCCCTATAAGGTGTATTAAGTCCTTTGGATAAGATGAACCCAACCTACGAGGTAATATTTTCTTGAATTGAAGTATGTATACTAATAAATCTTTAATATA	GAAATTACAGTAGAAAAGGAAACAACACTCAAATATTATGAATTGATTTACCAGTAGTAATTTTTAAATAATTCTCTCTCCTCAATGCGTCCTTAATAATTCTAGAATTTGATGCAGTTGCTTCCCATCTAGTAAGCACATATGTGAATTTTAAGTCAAATGTGCATGCTGCTAAGATGTTATGGATTGGATAGTCTTTC	AGATGAACCCAACCTACGAG	56.649	20	100	100	GGACGCATTGAGGAGAGAGA	58.893	20	100	100	173	331	503	AGATGAACCCAACCTACGAG	56.649	20	100	100	AGGACGCATTGAGGAGAGAG	58.89	20	100	100	174	331	504	AGATGAACCCAACCTACGAG	56.649	20	100	100	AGGACGCATTGAGGAGAGAGA	60.341	21	100	100	174	331	504
PolynSSR_142	AAAT	3|AHLA_contig_27541:4032-4443|+	3|SCEM_1.clean_(paired)_contig_82064:544-555|-	4|TWXB_1.clean_(paired)_contig_39130:938-953|-	0.47	0	0.99	GGCAAATGCTTTCGAGAGAATATCATCATTAACTTCATTCCCAAGATCCCCACAGAAGAGGCGAAAATCATCTGCACAAGTTCCACAGTAAGAGATCTCAGTACTTTCCAAAGAACTCTAACAATTTAAAAACATCTAAAATATTCAAATCATAACAGCAAGAGCAGAATTCCGAGAAGAGGCAATGCCCAAGTAATTTA	AAAGACAAAGTAACTAAAACCAATAACAAAAACTCAAAGAAACCAAACAAATCAACATACTCTCAGGCCAATCAGCCAATGTTGGATCTTCCCAGGTTTGCCCGGCAGCTTTACGGGGCAGAGCTCTCTTCTTGGTTTCCGCCTTGTGCTCAACCTCGCTGCTCGCAAGCGCAGCCTTCACACTCTCCAGAGCCTCGGGC	ACAGCAAGAGCAGAATTCCGA	59.998	21	100	100	GGCAAACCTGGGAAGATCCA	59.96	20	100	100	160	354	513	ACAGCAAGAGCAGAATTCCGA	59.998	21	100	100	GAGAGCTCTGCCCCGTAAAG	60.179	20	100	100	186	354	539	GCAGAATTCCGAGAAGAGGCA	60.406	21	100	100	GGCAAACCTGGGAAGATCCA	59.96	20	100	100	151	363	513
PolynSSR_143	AAAT	3|AHLA_contig_3108:1225-1636|+	4|SCEM_1.clean_(paired)_contig_22970:3061-3076|+	N/A	0.5	0.33	0.99	CAATTTAACCGCTAGGTAGTATAGGGGTACAATGCAATAGATTTCGAGGCAAATATAGGTGTTGGTGTGCATGAATGTGTATGTGTGAATAGTGAGGATGATTGTAAATAACAAGAAAAAAAACTCAAAAAACATTGTAGAGGCATCAGGAAAGGACATATAAATGATTTTTACTCATAGAATTTACACATTGCCCATAA	AAAATTAATCACAGCAGATCACAACGAAATAAATACAAATGTTGGTGACAAGAGATCAAAGTCCTACAGCGATAAGGCAATAGATGTAACCTCATTTTCAAGTAGGCTCATATTAACGAGATCCTTCCATGATATACAAAAAGTGACAAAATACAACAAATATTGGAATCTCACATTTGTTTCAAAACCTGGGCCTTGAA	AGAGGCATCAGGAAAGGACA	58.339	20	N/A	N/A	TGCCTTATCGCTGTAGGACT	58.223	20	100	100	153	338	490	AGAGGCATCAGGAAAGGACA	58.339	20	N/A	N/A	TGCCTTATCGCTGTAGGACTT	58.892	21	100	100	153	338	490	AGAGGCATCAGGAAAGGACA	58.339	20	N/A	N/A	TTGCCTTATCGCTGTAGGACT	58.892	21	100	100	154	338	491
PolynSSR_144	AAAT	3|AHLA_contig_3293:4440-4851|+	2|SCEM_1.clean_(paired)_contig_48780:2710-2717|-	N/A	0.5	0.33	0.99	TATTTTCGACAGATCATCAAACCAGTCCTTCCTACATTTTAAAGGGGGCATTTTCCTAAAGCAAACCTTCCAAATCAAGCTTGCACTATATGTTTTTATAACTAAATAAGAATTTCTTTTTGGAAAAAAATGAAAAGTAAAATGCATAAGGGTTTATCTGTACTATGACTATGGGGCAGTGTCAGCATTGTGGAACATAA	AAACTCCATTGTGATAATGAAAAACTAATAAGATATATATAGGCATAACTAAAGATAATAATTAACTTATAACTAGAATCAATGTAAATTTAAGATGTGCCAGCTTTATTTGTGTAATTATGAGAAAGCAGCCTGCTTATTCTGCACTAAGTTACCAGATAGGATCGCGCATCAATAGTTTCTCCAAATATTTTCATATA	CTATGGGGCAGTGTCAGCAT	59.818	20	100	100	ACTTAGTGCAGAATAAGCAGGCT	60.055	23	100	100	196	368	563	GACTATGGGGCAGTGTCAGC	60.463	20	100	100	ACTTAGTGCAGAATAAGCAGGCT	60.055	23	100	100	198	366	563	CTATGGGGCAGTGTCAGCAT	59.818	20	100	100	TAGTGCAGAATAAGCAGGCT	56.619	20	100	100	193	368	560
PolynSSR_145	AAAT	3|AHLA_contig_36104:5686-6097|+	N/A	2|TWXB_1.clean_(paired)_contig_37365:4226-4233|-	0.5	0.33	0.99	GAAAAGATGATGCGCATCAGTATTGAATATGGTGCTAAGCCCATGAAGAAAAATTTTAAAAAGTATACTCCATAACAAGATTTTACCTGCTTAACAGAACAAATGAGTAGTCTTCAAGTCCAATTTCACATAGGCGCCACTATAACAGAATTATTTCACAATGAACCATGTAATGAAATTTTCATAAACATAGTCAAGAA	GAATAAATAAGTAGCTCAAAAAATAGCATACCTTCTGACGCATAGCTATAGCAGTATCAGGGGCATCATTTCGAAGGCCACTTTGAAGACCTTTGACAACAAAAGCTCTTATAGTAGTCAAAGACTGCAAGGTTTTCATCAACTCATTCACACCAATTTCAGCAGAATTTCCTGATTCTTCTGTCTCCAAACTCTGTAGA	CAATTTCACATAGGCGCCACT	59.255	21	100	100	GTGGCCTTCGAAATGATGCC	59.899	20	100	100	173	320	492	AATTTCACATAGGCGCCACT	57.871	20	100	100	GTGGCCTTCGAAATGATGCC	59.899	20	100	100	172	321	492	CAATTTCACATAGGCGCCACT	59.255	21	100	100	GGTCTTCAAAGTGGCCTTCG	59.125	20	100	100	183	320	502
PolynSSR_146	AAAT	3|AHLA_contig_37594:635-1046|+	2|SCEM_1.clean_(paired)_contig_117289:465-472|+	N/A	0.5	0.33	0.98	CCAGGAAGTAAGCATTGCTGTAATTGAGAAGGAAAAGTATCACGTTTTGATGATGCAAAGTTTGCCGGATCTAACATGATGCTTAGAAAAAAATAGTGAGAAGTGGGAATGATGAAAAAGAGCTCCGTTGACAATCAAATGGTTACACTTTCGGTAAACACATCAAATAAGAGGTCTTGCCTGAATAACTTTCAAAATAA	AATAATGGCATCTAGCAGATGGACATAAGCATTTAATTTTCAAGCACATGATCATAGATTCAGAACAATATTGGTCTGATATAAGTTGCTGAATGAAAATAAAAGATCACAAAACGTCACACATACAAAAACTACACAATTGTCTTAAGACAAACAGCAGAACACTGAATTCCACAACTTTATTACAAGCAAGAGATCAA	TGCCGGATCTAACATGATGCT	59.582	21	100	100	TGCTTATGTCCATCTGCTAGA	56.24	21	100	85.71	181	262	442	TGCCGGATCTAACATGATGCT	59.582	21	100	100	AATGCTTATGTCCATCTGCT	54.779	20	100	100	183	262	444	TGCCGGATCTAACATGATGC	58.117	20	100	100	TGCTTATGTCCATCTGCTAGA	56.24	21	100	85.71	181	262	442
PolynSSR_147	AAAT	3|AHLA_contig_38367:854-1265|+	N/A	6|TWXB_1.clean_(paired)_contig_183351:774-797|-	1.5	0.33	0.73	ATAAATAAATTCAAGGGCATTTAGGTCCTCCTCTCTTAGTCTTCCAGTTGTTATAGCAAGGGCAAGATTGCTTGTTCCCATATGTTCCTGGTGGCACACACAGGCACTTTGCACAACACTTCTGGCAAAAGAACAAGCATGGCTTCTTATACTGCGTTGCCGAGCATCTCTCTGTGCATCTCCCAGAGCACTCTACCCAA	TAATAAATTTTATCATAATTCATTAATTCAAACTCCTTATTTTTAAGAATTTTAATATTGAAATATATAAATATTAGTTCTGAGTCTGACTTCCTTACCTTGTGGCTGAAGGCTTCCTTGTGTCACCCCATACTGTATGAAAGAAAATCATAAAAGTTCATGAAGGACATTCAAAATTTTCATTCAGTCCTTCAAAAATT	CCGAAGGCCACACAAGAACA	60.818	20	N/A	N/A	TGCCACCAGGAACATATGGG	59.742	20	100	100	188	108	295	CGAAGGCCACACAAGAACATG	60.069	21	N/A	N/A	TGCCACCAGGAACATATGGG	59.742	20	100	100	187	109	295	CCGAAGGCCACACAAGAACA	60.818	20	N/A	N/A	GCCACCAGGAACATATGGGA	59.449	20	100	100	187	108	294
PolynSSR_148	AAAT	3|AHLA_contig_38716:252-663|+	5|SCEM_1.clean_(paired)_contig_137630:322-341|-	3|TWXB_1.clean_(paired)_contig_180294:386-397|+	0.94	0	0.99	TTCTTGCTTAACTTTGAAGAACTTAAGTGTAAACATTTTTTAATTTATAAACAGAATTATTGGACAAAAATGGACACATTGACAACCCCATTGTAATGAAAATAGACATCACAGTAAGAAGAAAAACCAACAAAATTAATACAGTTGGTTGATAAGTCATTCGAATTATCCTAATTTTGCTATAATTTTTTTTTAAAAGA	AAAAAAGGGAAAATAAAAAAATAATGTGTTGTTATTGGGTTGACATCATTCCACATCAGCAATCAAGTCAAACATGGCTTGCAATTTGTCTTTTGGAAGCACAATGCCTTTCAATCTCAATTTTGATCACTGGACATCATAACATATCAATTGTGACCAAGATTCCCCAGCGATGGCAATTTGGAAATTAGAGTGGAACT	TGGACACATTGACAACCCCAT	59.853	21	100	71.43	TGTGGAATGATGTCAACCCA	57.032	20	100	100	197	270	466	TGGACACATTGACAACCCCAT	59.853	21	100	71.43	TGTGGAATGATGTCAACCCAA	57.764	21	100	100	197	270	466	TGGACACATTGACAACCCCAT	59.853	21	100	71.43	TGATGTGGAATGATGTCAACCCA	60.245	23	100	100	200	270	469
PolynSSR_149	AAAT	3|AHLA_contig_39854:738-1149|+	2|SCEM_1.clean_(paired)_contig_118302:188-195|-	2|TWXB_1.clean_(paired)_contig_110928:576-583|+	0.47	0	0.97	ATTACAACATCAATAGATTTTACATCAATCATTCAACAAAGATACAAAGTACATACTGGTAGAAAGGAATTAGTTGCTAGTGAAATGAAGCACTAGAATAAAAGAGTATACAAATGATGAGAATCACAATCTGAAGATAAGAACTAGTTATTTGAATGAGTGATTTTCTGAAGATCCACATAAACATTTTGTGTTTGAAG	ACATAAATAAAAGAGCTATCTATGTGATCTCTAAGTTGACAAACTAATTCAAAATAATAAAGCAAAGAACAAATTCTAGTGCTAAAATTGTTTTGAAAGAAGGTATTCTTTTGAGACAGGTTTTAATTTGTAGTACACTAGTACCGGAAGCAGTCTATAACATGGGGCTGAAAATTAAAGCTTGGTATAGCAATCAAAAG	GAGTGATTTTCTGAAGATCCAC	54.845	22	97.75	100	ACCTGTCTCAAAAGAATACC	52.498	20	100	92.5	176	357	532	GAGTGATTTTCTGAAGATCCAC	54.845	22	97.75	100	CCTGTCTCAAAAGAATACCTTC	54.486	22	97.75	100	175	357	531	GAGTGATTTTCTGAAGATCCAC	54.845	22	97.75	100	CCTGTCTCAAAAGAATACCT	52.184	20	100	90	175	357	531
PolynSSR_150	AAAT	3|AHLA_contig_42295:3183-3594|+	N/A	2|TWXB_1.clean_(paired)_contig_67840:4946-4953|+	0.5	0.33	0.98	ACATGCAGTGGGACTTCAGTTGAGATGAGCGGTTTGGACTGCGAGCCTACACTCATAACTGATCACCATTATTCATTATTGTTCTCAATGACACTTAAATTTGAAAGCTCTTGAATATCTTAGTTTTGTTTTCCACAATAAAATCAAATGCCACTAAGCCATAAGTCCTTCGGTCAGTGTTTGTTTTGGTCTCATAAAAA	AAACAGGAATTCTGAATATGAACCAAAGTTACTTAACTATTTTATAGTTTAGTAGTGAATATTCATCCACTAGAAACTCATCCATTCCTGAATACCTTCATCTCGTCAAATCGAACCTTCACCAACCGCGAAGAGTTCTAACAGGGGATTTGAGCGCCAATAGACCCGAAGGTCGCCAGCATATTGGACATTTCATTAAA	GCCATAAGTCCTTCGGTCAGT	59.793	21	N/A	N/A	AACTCTTCGCGGTTGGTGAA	60.179	20	100	80	192	357	548	AGCCATAAGTCCTTCGGTCAG	59.517	21	N/A	N/A	AACTCTTCGCGGTTGGTGAA	60.179	20	100	80	193	356	548	AGTCCTTCGGTCAGTGTTTGT	59.515	21	94.4	85.71	AACTCTTCGCGGTTGGTGAA	60.179	20	100	80	186	363	548
PolynSSR_151	AAAT	3|AHLA_contig_45358:4437-4848|+	3|SCEM_1.clean_(paired)_contig_114186:256-267|+	4|TWXB_1.clean_(paired)_contig_83837:1107-1122|-	0.47	0	0.99	GTACCTTTGTTTCTCTAGAAACGGTGATGAAGTGCAGAGCAATATTTTATCCAAGCATAAGCAACAGCAGTGATTGCATTTCTGATATGACAAATTGACATTAATAGAAAAAAATACAGATGGCCTCGATGAGATATCAGGATAGTGCAGGAGAAAGATGCAACCAGATAAAAGGGAAGCGTGCTTCGTGTTAATAAAAA	AATGGATATATTCAGTGGCAAAGACTTATAAGACTATAACAAACAATGCAAACTGAGATATTTTTCACTGATAGTTTTCAGCTTCACATTACAGGTTCCAAGTTCTACATGATAATCAACAGGAGAAGGAATAAACATGGACTTAAGAAAGTTTATCTGTTACATTATTATATTTATCTTCTAAACCATAATAAATGATA	TGCAGGAGAAAGATGCAACCA	60.203	21	100	100	TGGAACCTGTAATGTGAAGCTGA	59.928	23	100	100	167	345	511	GCAGGAGAAAGATGCAACCAG	59.528	21	100	100	TGGAACCTGTAATGTGAAGCTGA	59.928	23	100	100	166	346	511	GCAGGAGAAAGATGCAACCA	58.462	20	100	100	TGGAACCTGTAATGTGAAGCTGA	59.928	23	100	100	166	346	511
PolynSSR_152	AAAT	3|AHLA_contig_45912:1118-1529|+	2|SCEM_1.clean_(paired)_contig_13001:1283-1290|-	3|TWXB_1.clean_(paired)_contig_99288:1104-1115|+	0.47	0	0.97	AAGAAAATCTCTAAGTGTTTCAAAACAAAAGGCCCTTTCCAAGAGTGTCATCCTGAGAAACCTTGTGCTTCCAATACTATTCTAGTGGTGTGCTTACAACCTGACAACCCAAGTTTCTTGTTTCCTTTAATAGATCAAGGGTGTATTTTCTTTGAGAAATGAAAATGCCTGAATTACTTTTGATTGTTTCTATTCCAAAA	ACATACTTTGGCTTCCCAAGATCTTTGAACTTGAATTTAGATTGCAACAATTCTAGACATTGGCTATTTCTTTATCGTCATCTCCAGTGATTACCATATTGTCAATGCAAAAGATCAATGTCATTCCATTATTAAATTGCTTTATAGATAAAGGATGGTCAGTTATCCCTTATGTGTAACCGAATTACTTCATAATTGTA	TGGTGTGCTTACAACCTGACA	59.789	21	97.6	95.24	GTTCAAAGATCTTGGGAAGCCA	58.843	22	100	100	157	285	441	TGCTTACAACCTGACAACCCA	59.787	21	97.6	100	GTTCAAAGATCTTGGGAAGCCA	58.843	22	100	100	152	290	441	TGGTGTGCTTACAACCTGACA	59.789	21	97.6	95.24	AGTTCAAAGATCTTGGGAAGCCA	60.181	23	100	100	158	285	442
PolynSSR_153	AAAT	3|AHLA_contig_46846:365-776|+	2|SCEM_1.clean_(paired)_contig_151332:415-422|+	2|TWXB_1.clean_(paired)_contig_11100:194-201|-	0.47	0	0.98	TCGCGTGCTCTACTACTTGCTCTCCTGCCTTGAGGCCATCCTCATTGTTTTCCAACTTTCTTTCTTTTTCCTCCGTTTCGGATTTCATCTCTAATGTATGTGTGTATGTATACTACCCTAATCAATCATCCTATTCTTTTCTTTAATTTTACTTTTTGATCTCTTTATTTGAATTGAATTTGATAATTTAATAGAATTAA	TTAAATAGAGTGACTAAAAATATAGAATTAAAAAATTAGAGTTATGATAATATTATATGTGTATGTTATAAGACTACATATATATTTTCTGAAAAAGGAAACTATAAGCACATGTTTTAATTAATCTATTTAACACGTGTGGATAGAGTGGGGCACGAGCCATCATTTGACCCGACCCGGCACGTAACCGGCCCAGCGAA	Primers not available
PolynSSR_154	AAAT	3|AHLA_contig_49730:4473-4884|+	2|SCEM_1.clean_(paired)_contig_71860:825-832|-	3|TWXB_1.clean_(paired)_contig_30549:3784-3795|+	0.47	0	0.84	CGTCCCTTTTATACTCAAGGCGGGAAAAGCTTTGAATTCAAGGAAGGCAGAAATCCGTGTTCAATTCAAGGATGTTCCAGGCGATATCTTTCGAAGTACAGTTTTTTTTTACCTTTTCTTTATACACAACTCTTGGCTTGTACTGCAAGTGAGTGTTGATCAAATTGTATAACTATAATAATAGTAATAATATCAACAGC	AACTAAATAAGAAAATAATCATATGAAAACATTTTTCGGGAGAACAAATCGAAAATTTGGATTAGATAAATTGCAATATGGTTTCTATAATTAAAACTTTGCAGAAGTTCATGACTAGCTCATTTTAGTACTATTAATTTCATACTTCATCAGTTGATTGCCAACAGTATCTCTGAAAGATTTTTAGTGGGATTCTTGAT	TCAAGGATGTTCCAGGCGAT	59.088	20	100	100	TCGATTTGTTCTCCCGAAAA	55.31	20	97.05	85	199	265	463	TCAAGGATGTTCCAGGCGAT	59.088	20	100	100	TTCGATTTGTTCTCCCGAAA	55.31	20	100	70	200	265	464	TTCAAGGATGTTCCAGGCGAT	59.718	21	100	100	TCGATTTGTTCTCCCGAAAA	55.31	20	97.05	85	200	264	463
PolynSSR_155	AAAT	3|AHLA_contig_50036:1034-1445|+	2|SCEM_1.clean_(paired)_contig_37813:1255-1262|+	N/A	0.5	0.33	0.98	TTCAAATGCTCCAGCCACCTTTTAGGCCTTGATGCATCTAGTATTTCAATTTGCTCTGAGAAAATATGTATAAGCTTTTTGTGATATTTTGGTTTATAGCACTACTTGGGACACTCATTTACAAAATTTGGGAGACAACTTTATCCACATTACAACATCATTAGTTGTATGCTAAGCTTTCTAAATGTAGCTTTGGTAAA	AAAAAAATTGAGTATCTTGGCCATGTTGTATCAAGTAAGGGAGTTGAAATGAACCATTGCAAAGTTTAGGCTATTCTTTAGTGGCCAATGCCTACTTCACCAAAACAACTTTGAGCTTTTCTTAGTCTCCATGAATACTACAGGCAATTCATCAAACAATATGCATCTTTGGCTAACTCTTTAACTGATCTCTTGAAGAA	AGCACTACTTGGGACACTCA	58.283	20	100	100	GCAATGGTTCATTTCAACTCCCT	59.741	23	100	100	175	297	471	AGCACTACTTGGGACACTCA	58.283	20	100	100	ACAACATGGCCAAGATACTCA	57.281	21	100	100	144	297	440	AGCACTACTTGGGACACTCAT	58.739	21	100	100	GCAATGGTTCATTTCAACTCCCT	59.741	23	100	100	175	297	471
PolynSSR_156	AAAT	3|AHLA_contig_50484:2297-2708|+	2|SCEM_1.clean_(paired)_contig_141115:215-222|+	3|TWXB_1.clean_(paired)_contig_82106:5801-5812|-	0.47	0	0.98	CTACACTGTGTCAACTGATTAAAGATCCCTAGCAACCAGTTCCCCCATCTCATCAGCATTAGTAAGGGATGGGCACAGTCTAGTTAACTGAACCGAACCAATTCATTCAGGTTTCATAAACCAGAACTGAAACAGAACCAATTGGACAGGTTAATGGATCCGGGACTCGGTTTATTTTATTTCTAACATTATATCAAGAA	AAAAAATACAAGATATACATAAAGAAAGACTAGCTCCATTAAATGCATTTAACCTCTTCACTAAAAACACCCACTATTATGACTAATCGAGTTTAGTTTTCTATAATGGATGTTTAATTATTGACTATGCAGGCCATTCTATTACACCAAATAATAGACATGAGTTTAAATTACTTCATTCACTGTAAATAATATAAGGG	GTTAATGGATCCGGGACTCG	57.85	20	95	100	TGGCCTGCATAGTCAATAAT	54.462	20	97.5	100	199	349	547	GTTAATGGATCCGGGACTCG	57.85	20	95	100	ATGGCCTGCATAGTCAATAA	54.462	20	97.5	100	200	349	548	GGTTAATGGATCCGGGACTC	57.454	20	95	100	TGGCCTGCATAGTCAATAAT	54.462	20	97.5	100	200	348	547
PolynSSR_157	AAAT	3|AHLA_contig_59967:1301-1712|+	N/A	2|TWXB_1.clean_(paired)_contig_21608:3515-3522|+	0.5	0.33	0.97	CTAAATGTAAGATTAAAGATAGAAAGTCCATAAATAACATTAATTACACACCTAAGCAATGAGAATGGCCCCATAACATTTTTTAAAAGCTGCTGATGTGGTAAAATATGCATCATTTTCTTAACAATATTGTGGTGGCAAAATGCATTAAAGTTTGCACATAAGTTGCCACAGCATGATATTTAAAAATTTTAAATAAA	ATCAAAAGGTAACTTAAATGAATGAAACAAAGAGCATCATCATACAGCGCTAAAAATTCAATCGAACTATTACGCAACATCCTCTTATCACGGACAATAACTAACTTAATATCCAATACAACATTAAATTCGGTAAAACTTGAGGTCCTAAATATGAAACCTAGTTATTGGGCCAAGTAACTAGGTTAAGAGCTAGCTGC	TGCACATAAGTTGCCACAGC	59.402	20	100	90	AGCGCTGTATGATGATGCTCT	59.656	21	N/A	N/A	108	355	462	TTGCACATAAGTTGCCACAGC	60	21	100	90.48	AGCGCTGTATGATGATGCTCT	59.656	21	N/A	N/A	109	354	462	TGCACATAAGTTGCCACAGC	59.402	20	100	90	GCGCTGTATGATGATGCTCT	58.207	20	N/A	N/A	107	355	461
PolynSSR_158	AAAT	3|AHLA_contig_62939:1079-1490|+	N/A	4|TWXB_1.clean_(paired)_contig_77332:340-355|-	0.5	0.33	0.96	TAAACTGGAATTTCTTTTTTATTTGATATCTATTTTTTTTATTTTAAATATTAAATATAAAAGTAATTTTATATTTTTGTCAATGCCGGACCAGCTGAAAACACAAATTTATTTTGTTTCAGTCCGTTTTTCCGAGATGATAAGGTGCCATATGTGTCTCCTGCAGAGAACATACACTTTGGTTGAAATATTCAAACAAA	AAACACATGATACTCGGTAAGAATCTGGAAGATTCTTTGGCTTTGAAAAACCTCGAGCTTACTTGCAGAAAAAGTTCACAAATACAATTTAAAATATTCTGAAACAGTTGTTAACAGAAAAAATTTGAACTCCAGATGTTTGTGTACATACAGACTGAGGTGCTCAAAGACACCAAAATTCAGACACAATAATGTGACAA	AATGCCGGACCAGCTGAAAA	60.539	20	100	100	TCTGCAAGTAAGCTCGAGGT	58.742	20	100	50	200	281	480	CCGGACCAGCTGAAAACACA	60.818	20	100	100	TCTGCAAGTAAGCTCGAGGT	58.742	20	100	50	196	285	480	AATGCCGGACCAGCTGAAAA	60.539	20	100	100	TCTGCAAGTAAGCTCGAGGTT	59.381	21	100	47.62	200	281	480
PolynSSR_159	AAAT	3|AHLA_contig_67211:226-637|+	4|SCEM_1.clean_(paired)_contig_120340:2168-2183|+	N/A	0.5	0.33	0.99	GTTGAAAAATTTTAGGGACTGATAGGTGAATATCATTCTAAACTATGCACGGAAGAAGTCACATCATGAGACTGTAGTTATCCATCTTCAACATGAAATAGCAGCCATGCTACTTGGATAAGATGTATCCGTAATTTTAGTTATATTCGTTTAAAATATTTATTTTTGTTGAATAATTGTATATATGCATATAGCAAAAA	AATCATGATATGAAAGAACGAATTAAATTTAGCTTAAACACGACAGGAGTATAATTGACATTTTGATTTGATGTTATACATCCAAATAATAAATGCCAATTTGGATTGGTGATTATTTTCCACAACAGTTCGATTTTATGCTAAAATTTGCATGTAATCTCAATTCACATTGGAAAAATGGTTTTAGAAAAATAATGTAA	CAGCCATGCTACTTGGATAAGA	57.923	22	100	100	ACTCCTGTCGTGTTTAAGCT	56.798	20	100	100	161	301	461	AGCCATGCTACTTGGATAAGATGT	59.896	24	100	100	ACTCCTGTCGTGTTTAAGCT	56.798	20	100	100	160	302	461	GCCATGCTACTTGGATAAGATGT	58.607	23	100	100	ACTCCTGTCGTGTTTAAGCT	56.798	20	100	100	159	303	461
PolynSSR_160	AAAT	3|AHLA_contig_68959:3919-4330|+	2|SCEM_1.clean_(paired)_contig_146003:756-763|-	N/A	0.5	0.33	0.99	CTCTTTTCGCAGTTCTCGCAGAGCTTCTGGTGTCTGTTTTGGTAAGTAACTCTGCAAAAGAATTGATATTAGAGTTCAACTAGTATGTTTATACAAGCTTGCATGCACCAACATCTTATATGTTCAATTACATCAATGTTTCCAAATGCTTTGATATCTCTTTAGTTTAGAACATCTAATTTGACATTCACCGCTAAAAA	TAGGAACTCATAGAACAGGGCAAGAACTTACAGTGTTTGAGAAGAATATACGGTCAGTATTGGTCTTCTTAAAAGGATAAACCCAGGAGTTGCAATCAAAATGAACATTTTCACCATTACGCATCTCAATTTTCACAAATTTCAGAAAGAACTCATGTTTATCTCCATTTTTCACCACAATAGCTCCTGGAGTTCCAAAT	GCTTGCATGCACCAACATCT	59.754	20	100	100	TGCCCTGTTCTATGAGTTCCT	58.449	21	100	100	138	296	433	AGCTTGCATGCACCAACATC	59.754	20	100	100	TGCCCTGTTCTATGAGTTCCT	58.449	21	100	100	139	295	433	CAAGCTTGCATGCACCAACA	60.25	20	100	100	TGCCCTGTTCTATGAGTTCCT	58.449	21	100	100	141	293	433
PolynSSR_161	AAAT	3|AHLA_contig_72646:1369-1780|+	3|SCEM_1.clean_(paired)_contig_90051:1384-1395|+	2|TWXB_1.clean_(paired)_contig_104347:1177-1184|+	0.47	0	0.99	ATCAAAGATCAATACCTATAAAGGTCTTATCATATTTACACATGCCTATATGATCTTCGTAATTATACTCCACGGTTCCTCAATTTATAAAGCTATTACTCATTTATAATCGTATTTTTACAACACATCAATCTCAAGCCCCATTTAATGCACAAGGATCCTCTTAATCTCTTAATCATCTAAAATATGTTAAGGGAAAG	TAATCAACCATTAGTAAACAAGTCGAGCAATGCAGTGCATTATGTTAATATAGACCAAAGGAAAGAGTTGGCACACTCAATGATGACACATGTTAGTGGGAAAATAACATATGGTTATCTTACATGGTCAAGCAAAGATCCAACAATGAAAAATTCTTCTAACCAAAACGGACACATAATACAAACATGGAGGACAAGTA	GCCCCATTTAATGCACAAGGA	59.17	21	100	100	GCACTGCATTGCTCGACTTG	60.454	20	100	97.5	113	337	449	AGCCCCATTTAATGCACAAGG	59.167	21	100	100	GCACTGCATTGCTCGACTTG	60.454	20	100	97.5	114	336	449	ACACATCAATCTCAAGCCCCAT	60.025	22	100	100	GCACTGCATTGCTCGACTTG	60.454	20	100	97.5	128	322	449
PolynSSR_162	AAAT	3|AHLA_contig_80654:10-421|+	N/A	2|TWXB_1.clean_(paired)_contig_173388:364-371|+	0.5	0.33	0.73	TTAATAGATGAAGACTTCGTTTAAAGCTTTGCTTGATTAGCTTAGAAAAGAAAGCTACTTTCCCCTATTCAACAAGTAAGCATATTGAAGAAGGAAATTAATATTAAACAATGATATTTTTTACTATACAAAACACTTACGTGGCTTCATATAATTCTTTGGATTGGTTTATTTGATGTGCTCACGACATTGTATTAATA	AAAATAACTACTCTAAAATATAATAAAACAATTGAGTACTTTTCAAATGAAATATATATCTAAAAGAATGAGAGATTTATAAGTATTACGCTAAATTAAATAGCCAATAAAAATCTACTCGGAGGACACGTATGGATCTGAGTTAAGAGGGGGTGGACTATCAAAACAATTACGTGAAAATATCAGTTGAGAGGTTGAGA	TGATGTGCTCACGACATTGT	57.832	20	N/A	N/A	TCCATACGTGTCCTCCGAGT	60.035	20	N/A	N/A	175	182	356	TTGATGTGCTCACGACATTGT	58.507	21	N/A	N/A	TCCATACGTGTCCTCCGAGT	60.035	20	N/A	N/A	176	181	356	TTTGATGTGCTCACGACATTGT	59.122	22	N/A	N/A	TCCATACGTGTCCTCCGAGT	60.035	20	N/A	N/A	177	180	356
PolynSSR_163	AAAT	3|AHLA_contig_84014:2749-3160|+	3|SCEM_1.clean_(paired)_contig_14725:2954-2965|+	2|TWXB_1.clean_(paired)_contig_59038:3109-3116|-	0.47	0	0.99	TGCATTAAATAGGGACTCTGCAAATATAACCAATTGTTATGCATACATAAGCAAGTGAATGGGCCACATATGGAATACTTGGCAGATGAATATGTTTTAAACAAAGGTTTAAATGCCATTTGAGTTTGTAAGGATTGATAAACAAGACATAGCAGGTAGAACAGATACCTTTCTAAACTTACCTTTCATGGGTTGCAGCA	AAAAATACAGACAAGTATTGAAGAGCAGTTGGGATTTTTCCACCTTTTCGCCATCTAAATGTTGTTTGTATCGAATAACAAACAGAAGGCACCAAATAGAGATATAAGAAAAAAAACATAAGGAGGTAAGGGCGGGCCAAAGGATTTCTAACATTTGAGTAACATCTGCTACCCTCTGGGGCTGTTTCACGATTAATTTC	ACCTTTCATGGGTTGCAGCA	60.47	20	100	100	CCCGCCCTTACCTCCTTATG	59.603	20	100	90	168	380	547	CCTTTCATGGGTTGCAGCAA	59.319	20	100	100	CCCGCCCTTACCTCCTTATG	59.603	20	100	90	167	381	547	ACCTTTCATGGGTTGCAGCA	60.47	20	100	100	CCGCCCTTACCTCCTTATGT	58.871	20	97.5	100	167	380	546
PolynSSR_164	AAAT	3|AHLA_contig_88715:922-1333|+	5|SCEM_1.clean_(paired)_contig_54709:251-270|+	N/A	1	0.33	0.98	AATAAGTATAAAAGTGAACTTTTTACTGCTTCAACGTTAATTTGTTTTTGCTTCAAATGGAATGGGGAACCCAAAAGTAATGTTTGACACTCTAATAAATTTGTCCTTGACAATCTTAAATAATAGATTTGAAAATTCCTTTGCTTTCAATGGGTACATTTGGGTTTTTACACCATAATTATCACAAGGCCATTTTCTCA	GAAGTATTGATGAAAGTATCCTTTACTTTTACCCTTTATTCATTGATAGAGCAATTCAATAGGAACTGAAATTGTAATAGGAGTTAAAACTAGTTGCAATCTATGTTTTGTGGGTTGGAGGTTAAAAACATTCATAAAAAAGAGTTTCAAGATGCCCTTCTCATTATTTTTAGGACGTTACTCCCTATTTAATAGTTAAC	TGCTTTCAATGGGTACATTTGGG	59.74	23	100	100	AACCTCCAACCCACAAAACA	57.76	20	100	100	194	341	534	GCTTTCAATGGGTACATTTGGGT	59.739	23	100	100	AACCTCCAACCCACAAAACA	57.76	20	100	100	193	342	534	TGCTTTCAATGGGTACATTTGGG	59.74	23	100	100	ACCTCCAACCCACAAAACAT	57.53	20	100	100	193	341	533
PolynSSR_165	AAAT	3|AHLA_contig_93041:507-918|+	N/A	4|TWXB_1.clean_(paired)_contig_138398:545-560|+	0.5	0.33	0.97	GCATTGTTTTAAAAACAAATAATATAAGACAAGGTAGCCATAACATACTAAGATAAAATGTTGACGAATATTATATACTTGAAGGTTCAATTTTATAACCATTTATTTATTGCGACAAAGTAAACAAATTAATAAATTAGAAAGAAAAATATGTAAATAAAATGCATAGCTAAATAATAAACAATTTAATAAATGAAAAA	TTGATAGCTTTAAAAAATTTATAGATGAATCTATTACGTTGACTAATTAGTTTCAAAACAAAACTCCAAATTTCACAACTTCATCCAATTTCTAAAGTTGATGATTGATTAATCATAATTGATGAGTACAGGTTTTTACACATTTTTTTTCTTTTATTTGTAACACTCTACATGCATTTCTTATTGATATTCCATATTTT	Primers not available
PolynSSR_166	AAAT	3|AHLA_contig_9312:1048-1459|+	4|SCEM_1.clean_(paired)_contig_31240:1822-1837|-	N/A	0.5	0.33	0.98	GTCTTTCTCCTCCTCAAGAACCACGAGAACCACCGCGCGCAACACCTCGAAGCATGTTAGATGCTCCTCCGCGGGCGCCACCGCGTGCAACGCTCAGGAATCTCATCCTCCCTTGATTTTCAAAGCTACTTTTTGCTTTTGAATTTTCCACATTGTTTTTCAAAAAATTTCATATTGATTAATAATCTCCACCAGAAAAA	AAGATTACAAAATTCTTTTGAGCACACCCACGCGATAACAACATCAACATTACTACATAGGTGAATCCACAATAATTTTTTTGTTGATCTGGAAATTTCAATTTTAAAAACAAGTCAAAGAGATCTCATTAATAAAGAACGCTTCAGAAAATCGAGATCAGTACGTAGATTGCAAAGTTTATTAAGAGGATAAGGTAGCC	TGCAACGCTCAGGAATCTCA	59.679	20	100	100	GTTGTTATCGCGTGGGTGTG	59.835	20	100	100	169	285	453	TGCAACGCTCAGGAATCTCA	59.679	20	100	100	TGTTGTTATCGCGTGGGTGT	60.25	20	100	100	170	285	454	GTGCAACGCTCAGGAATCTC	59.276	20	100	100	GTTGTTATCGCGTGGGTGTG	59.835	20	100	100	170	284	453
PolynSSR_167	AAAT	3|AHLA_contig_93180:428-839|+	3|SCEM_1.clean_(paired)_contig_136499:358-369|+	2|TWXB_1.clean_(paired)_contig_96254:2946-2953|-	0.47	0	0.97	TTCATTACCTGGAAACCAAACATAACCTGCAGCCAGTCAAGAAGGTCTTCAGTGACCTTCATCTTATGATCTTTTGGCCATGGTAACCCTCTGGTATTTCGAAGAGCATTAACAGCAGCTTGAATCTGCATTTAAGAGAGAAGATGATTTAGCAGATGCTATCAGGACTCCACACTGAATAAAAATGAAAATAAATAACG	AAAGAGGAGAAAAAGACGTTCGCTCAAAGGTGTAAAGCCAGGAGAAAAAAAACCTCAGTATACTGCATAATGGCCTGATTTGAACTACCAGGATCAAGAGGAAGAATGTTATAAGGCACATATACTTTTGTCTTCTCTTCAACTTGAGTATGAGCTTCCAATACCTAAGTAAGAAGCAAAAAATGAGGCCATGAACAACG	TTGGCCATGGTAACCCTCTG	59.669	20	100	100	ACACCTTTGAGCGAACGTCT	59.896	20	100	100	172	273	444	TTTGGCCATGGTAACCCTCT	58.919	20	100	100	ACACCTTTGAGCGAACGTCT	59.896	20	100	100	173	272	444	TTTGGCCATGGTAACCCTCTG	60.272	21	100	100	ACACCTTTGAGCGAACGTCT	59.896	20	100	100	173	272	444
PolynSSR_168	AAAT	3|AHLA_contig_95487:39-450|+	2|SCEM_1.clean_(paired)_contig_131283:2025-2032|-	3|TWXB_1.clean_(paired)_contig_145590:409-420|+	0.47	0	0.98	AAATTTAAAACAGATGAAGAGAGTTGAATTTAATCATTTATGTCAAGTTGGAGGTGAGTGGAACAAAAACTGATATGTGGGTCACATATAACAAACAATAAACTAGTATATGAAATGATGATAATTGATAAACAAATGATTCTGTCATTCATCAAATTAACACTCCAATCAATCACAAATAAAAATCAATACTAAAAGGA	AAAAGGAAGTCAGTAAGAAACACAATCAAGCTAGAACCAAGCTTAGCCAAAGTAGATAGAGCATCTCTTGTCTTTGTACTCAGGCAGCATGGTTCCATCAGCACCAAGTTCCACATCACAATTAACATACATCTTATGAGAGTGTGTGTCCCATACTTCAACCTTGAACCGGATCGTTGTGTTCAATTCAAGCCTGAACC	AAAACTGATATGTGGGTCAC	53.178	20	100	100	TGGCTAAGCTTGGTTCTAGC	57.597	20	100	100	196	103	298	GTTGGAGGTGAGTGGAACAA	57.658	20	100	100	TGTGTTTCTTACTGACTTCC	52.792	20	100	80	190	84	273	TGTCAAGTTGGAGGTGAGTG	57.38	20	100	100	TGTGTTTCTTACTGACTTCC	52.792	20	100	80	196	78	273
PolynSSR_169	AAAT	3|AHLA_contig_95970:1220-1631|+	N/A	2|TWXB_1.clean_(paired)_contig_30953:1250-1257|-	0.5	0.33	0.97	ATCTATTGCCGGACTCTGCATTTTTTTAAAATGCTATCAGACTCTTCTTAAGCATTAAATAGGAAGAAGATCGACAATTTATACTCACAAATGCAGTAATCTCAAAGCATATCCCTTCAAATGAATGGCAGAGCCACACATCACCTTCAAAGTCATAAGTATCCAGCATCAAAGCTCTAGCACCGTTCTAAACATTAAAA	AAACCGAGTTAAATCAAGCAATAGAAACACAAAATCTGCGAACACTAAACATATAGTGAGAAATTTTGTTTTGGTTCACATTCAGCTGCTCGGTAACAGAATCCTCTTGGTTTGAGAAGGTAATACGCGGAAACGGGGTATGAGATGGCTCATTATCAATGGCATAAGAGTTGTGTGTGGTGAGATAAGCATAGCTGTTG	GCAGAGCCACACATCACCTT	60.607	20	100	100	ACCGAGCAGCTGAATGTGAA	59.965	20	100	95	179	327	505	GCAGAGCCACACATCACCT	60.003	19	100	100	ACCGAGCAGCTGAATGTGAA	59.965	20	100	95	179	327	505	GCAGAGCCACACATCACCTT	60.607	20	100	100	CGAGCAGCTGAATGTGAACC	59.555	20	100	85	177	327	503
PolynSSR_170	AAAT	3|AHLA_contig_99314:58-469|+	2|SCEM_1.clean_(paired)_contig_147610:381-388|+	N/A	0.5	0.33	0.72	GTTCTAGTTCGGCTTTTACGGTTGGGCTCCGGCTAGGTTTCATGAATTCAGTTCAAAATGACCGCATTTATTGTGGACCATGTCAAATGTAATAAAACCCCTCGAATTAATAAAAAATACATATATTTTTGAAAAAGTAATAAAAAATTAATATTTTGTAAGAAAATGTTATTTATTTCCAACATAAATAAATGGAAAGA	AAAGGAAAGAATTTTAGAAATCCAGCAGTTCATGTATCTTGAGGATTGAGAGCATCATCTCCTGATCCCGCGCAAGATGCATTTTTTCTCCAAATCTTGAAACCCTTCATCCCTTTCTTCGTTCCCAATCTCTCTTCCAGATCCTCTCACACCCTCAAACCCTAATTCCCATCCTCGGCTTCCATGGATAACGAGGCTGG	CGCATTTATTGTGGACCATGTCA	59.872	23	91.3	100	CCTCAAGATACATGAACTGCTGGA	60.383	24	100	100	194	119	312	CGCATTTATTGTGGACCATGTCA	59.872	23	91.3	100	CTCAAGATACATGAACTGCTGGA	58.237	23	100	100	193	119	311	CGCATTTATTGTGGACCATGTCA	59.872	23	91.3	100	TCCTCAAGATACATGAACTGCTG	58.237	23	100	100	195	119	313
PolynSSR_171	AAAT	4|AHLA_contig_102426:1320-1735|+	N/A	3|TWXB_1.clean_(paired)_contig_166547:385-396|-	0.5	0.33	0.98	AATTTAGTAATTGTCTCCAATATTAATTCTTGGTTGGATTGATTTACATGCGAATTCAAACGTGGCAGAATTGAATAAAGGCAAGATTGTGGAAATAGCATGGAAATTTTTCTATGGCATGATATGTTCTTATATTGATTAACATTATCTTAGATGATCAGTTGCCCTTCTGTGAGATCAATGTAGGATTCTGTTGAGTG	GAATAGCATACTAAGGATTGTGATGTTGTGAAAATGTTCTTCAAATCTTATCAAATTTCTCAACAGTTTTTGTCATATTGGATTTAGTCATTTCTTCTGCATGCCATTGAATGTTTTAACATATATAATGGAGAGTTATTAAGTTTGGACTTCTCTATATTGGTTTTCTAATACACAAGTAACATAACCCCCCTATAGCT	TCAGTTGCCCTTCTGTGAGA	58.576	20	95	100	TGGCATGCAGAAGAAATGACT	58.201	21	100	100	165	357	521	TGATCAGTTGCCCTTCTGTGA	59.301	21	N/A	N/A	TGGCATGCAGAAGAAATGACT	58.201	21	100	100	168	354	521	TCAGTTGCCCTTCTGTGAGA	58.576	20	95	100	ACATTCAATGGCATGCAGAAGA	58.906	22	100	100	173	357	529
PolynSSR_172	AAAT	4|AHLA_contig_102539:370-785|+	3|SCEM_1.clean_(paired)_contig_102614:1230-1241|-	N/A	0.5	0.33	0.99	AAGCAAAGAGAGGATAGGGGGGGAGGAGACGTGGGAAACCAGCAAGAAAACAATTCTCATGCTTTATCTTTATTTTTTCTCTCCTTTTGAGACCCAAATTTGAGCTGTTTTGCTTTTCTCTGTTTACTGCCTCAAAGATTCTCTCCCTTTCAAGTCAAAGAAGTTAATGAAGAAAAAGAGATAGAGTGAAAAAAGGTGAA	AAAGTGGAATAAGAATGACATGGAATTTAGAAAAGATGAACCACAGCTCATGCATATATTCTTCTTCCCCTACTTTGGTTTGGAAAAACACAACGAGACAGCATCATTCTAATCCTTGCTTCTTCTTCTTCTCTATATTTCCTTCCATGTCTTCATTGCAGAACCAGAGTTTAGTTCCACTCAACTGGACCAATCAGGAG	CTGCCTCAAAGATTCTCTCCCT	59.495	22	100	100	TGCATGAGCTGTGGTTCATCT	59.996	21	100	100	144	326	469	TGCCTCAAAGATTCTCTCCCT	58.444	21	100	100	TGCATGAGCTGTGGTTCATCT	59.996	21	100	100	143	327	469	TGCCTCAAAGATTCTCTCCCTT	59.084	22	100	100	TGCATGAGCTGTGGTTCATCT	59.996	21	100	100	143	327	469
PolynSSR_173	AAAT	4|AHLA_contig_108592:2288-2703|+	5|SCEM_1.clean_(paired)_contig_13103:5409-5428|-	N/A	0.5	0.33	0.98	GAGAGAGGAAATGACAAAGAGGTGCTCTGGAGCTACAACCCAGCGAGACAAGGTTATTATCAAAGGAGGAAAATGAGAAGAGATGAGGGGTATCGACAGACATCAATATTTTACGTCCACTGGAAATTGTCTTATGCAGGGAGACTCCCTAAATGCTCTAGATATATACATAACCATATAATAATGCAGAGAATAACAAC	ATTCCTAAAACTTTGGACAATCTGAATCTTCTTGTCCCACCAAACCAGCTTGGACACAATAAGCTCATTAGTGATTTTGCAAGGATATTTCAAATTGGCTGGTGATATTTTTAACTCAGTCTTGAAAATATGAGATGCTCTTCCTAAGTATGCAAATACAACTAATGAGGCTATTCTAGCGCATAAACACCCACAACTGC	AGATGAGGGGTATCGACAGACA	60.092	22	100	100	AAGCTGGTTTGGTGGGACAA	60.033	20	100	100	187	280	466	AGATGAGGGGTATCGACAGACA	60.092	22	100	100	TGTGTCCAAGCTGGTTTGGT	60.034	20	100	100	194	280	473	TGTCTTATGCAGGGAGACTCC	58.889	21	100	100	AAGCTGGTTTGGTGGGACAA	60.033	20	100	100	140	327	466
PolynSSR_174	AAAT	4|AHLA_contig_108719:752-1167|+	N/A	5|TWXB_1.clean_(paired)_contig_77606:4220-4239|+	0.5	0.33	0.98	TCCAATCTTTAAGGTTAATAACACATCAATCCCAACTAGAGAACACAATACCATTAAAGTAACTAACATTCATTTCCAGTCCAGAGCTAGATCATCACATTCACAAACAAATACGAGCAAATGACAACAAATTAGTCCAATAGAACAAAGATCTAGCAATCCAAACTAAAACAGCAGAACATAGATCAGAATCCAAGGAA	AAACCAATAATCTCAAAATTCGAAGAGAAAACAAAAGATACCAGCCATGGAGGCGCTTGTGGAGATTGATCGTGTACTCTCTCGTCACCACATCCTTCCTCCCTTTCCTCGCCTTGTCCACCATTCTCGATTCACCGCCAACTCCCTTTCCCTCTCTCTCTCTCTCCCTCTCTCCCTCTCTCCCAAATCCCTAGCCTGGA	GCAATCCAAACTAAAACAGCAG	56.763	22	100	100	TCGAGAATGGTGGACAAGGC	60.036	20	100	100	191	355	545	GCAATCCAAACTAAAACAGCAG	56.763	22	100	100	GGAGGAAGGATGTGGTGACG	60.108	20	100	100	163	355	517	GCAATCCAAACTAAAACAGCAG	56.763	22	100	100	AGGGAGGAAGGATGTGGTGA	59.881	20	100	100	165	355	519
PolynSSR_175	AAAT	4|AHLA_contig_109419:2951-3366|+	5|SCEM_1.clean_(paired)_contig_37392:301-320|-	N/A	0.5	0.33	0.97	AAACGCTCAGCCTCTTTGATCATAAATCGAGATGGTGACACAGCCCACGCGGCATCCTTTGCTCATGCTTTATTCACATGATTTGCACATGGAATTAAGTCGGTAACAAAGTATAACAACTTTTAGGACACGTGGTCACGTTTATCTATCTCTCTCTTCCTACAGTAATGTATAGCTAGATATACAAGTATTTTTATTGA	TATTGCAAGTGAGTCTCTTTTGTTGCACCCATGCACACTCATCTCTTGCACCGCCAAGGCGACAACAAGACAATAAAACACTAGATTTCTTGTGTTTTAGCCCCATGCTGATATGACGTCGTGCATGATCTTTGATTTGGTCCCAGAGGAGCGGCCATTGGTCTTGAGGGGAGGTGCCGCTGCTGCTCTGCCTGGCAGCT	TGCACATGGAATTAAGTCGGT	57.934	21	100	100	GCGGTGCAAGAGATGAGTGT	60.672	20	100	100	187	283	469	TGCACATGGAATTAAGTCGGT	57.934	21	100	100	TTGGCGGTGCAAGAGATGAG	60.675	20	100	100	190	283	472	TGCACATGGAATTAAGTCGGT	57.934	21	100	100	CTTGGCGGTGCAAGAGATGA	60.675	20	100	100	191	283	473
PolynSSR_176	AAAT	4|AHLA_contig_110060:12-427|+	5|SCEM_1.clean_(paired)_contig_128652:4793-4812|+	N/A	0.5	0.33	0.98	CTTCAAGCTTGAAGCCAAAATTTAAGATGAAAAGTGCATAAAAGCCTGTTTTTACGTCTGTCAATTGGAGATGAAAAACACTTGCAGTGTTCATGTAAGAATCATGAATTTTTACATGATTTTTTATTTAAAAAATCATGATTTTAACAAATTGCGCATCTATAGCGTGAGATGGAGCTAGCTTTAACCAGCAATAATGA	GCAGGGGGAATCCAATTAGAAACCGATTCTCACCTGCAACTGCGACATCACCAAATATGATCCGACCTTTCGCGCCGATGGCTCCCCAGGGCGGCTCCCAGCGGAGAGCGACAACGACTTGATAATCGGCAAAAACACACCGCCCCCCCTAGCCGTCGTGCTGGGCATTGCAGGAGCAATTAGAGCCTCACTGACAGTAA	GCGTGAGATGGAGCTAGCTT	59.896	20	N/A	N/A	TCAAGTCGTTGTCGCTCTCC	60.039	20	100	100	174	175	348	GCGTGAGATGGAGCTAGCTT	59.896	20	N/A	N/A	TTTGGTGATGTCGCAGTTGC	59.689	20	100	95	107	175	281	AGCGTGAGATGGAGCTAGCT	60.755	20	N/A	N/A	TCAAGTCGTTGTCGCTCTCC	60.039	20	100	100	175	174	348
PolynSSR_177	AAAT	4|AHLA_contig_110554:170-585|+	N/A	6|TWXB_1.clean_(paired)_contig_87598:639-662|-	1	0.33	0.98	ATGTCTTTGTTCTATCTTGGCCTTGACCTTCCTAGATGGCTCATGAAAACTATTGATAACTCCATGTTCCATTTGTAATTTGCTTGTTGCTTTTTAGTTGTTGTGTTGGGTCTTTGTTTGCCCTATTTTGTGTTGTGTTTTTTCTTGTACAATGTGTTTTATCAATAAATAGCTACGTTGTATCTCTTCTTCTCAGATAA	AAAGATCAAGGGCACAACTATACCAAACTATAACAACACCAATAAAAACCAATGAGTTTGATTATTATTCTTGGGAAGGTAATTGTCCCACCAAGGTGCCCATTTGATTTCTCTAGGTTGAAGAGAAAACAAAACAAAAACAATGAATAAAGAAAGCAAAATAATGAAGAAAAGATAAAAAGAAGCAAGAATGTAACAAA	TGTGTTGGGTCTTTGTTTGCC	59.794	21	100	100	TGGTATAGTTGTGCCCTTGATCT	59.22	23	100	100	140	270	409	TGTGTTGGGTCTTTGTTTGCC	59.794	21	100	100	TGGTATAGTTGTGCCCTTGA	56.143	20	100	100	140	270	409	TGTGTTGGGTCTTTGTTTGCC	59.794	21	100	100	GTTTGGTATAGTTGTGCCCTTGA	58.924	23	100	100	143	270	412
PolynSSR_178	AAAT	4|AHLA_contig_116907:1197-1612|+	N/A	3|TWXB_1.clean_(paired)_contig_179168:991-1002|-	0.5	0.33	0.96	TTGCCCCTTCACCCCTTCATCTGGACCGTCCATCCGTTACTTCCGTTAGTCTTACTCTATAAATATCAGTGCGTTTATACTTTATATTGATAATCAATGTTGATGATTTATTTACAAGAGAGGGTTGACACTCACTCGCATGCTAATTAATTGGAGGCCTAGTTGATTATACATTCATATTGATCAGTTACAGTATAGTA	AGATAAAATAAAAAGAAGGGTGAAAATGAATTAAAGGGAAATGATATCAAATGGGTACAATTTTGTCACTTTCTTTTATTTGCATGTGTTGAGGGGTCTATTGGAGCCCATCTCAGCAGCTTTTATTCAATTGGTCTATATATATATATATATTCTAGTCATATAATAAAACTTAAATTCCTTGTTTCCCCCATGTTTGA	TTGACACTCACTCGCATGCT	59.966	20	N/A	N/A	AGACCCCTCAACACATGCAA	59.522	20	100	100	191	324	514	GTTGACACTCACTCGCATGC	59.835	20	N/A	N/A	AGACCCCTCAACACATGCAA	59.522	20	100	100	192	323	514	GGGTTGACACTCACTCGCAT	60.321	20	N/A	N/A	AGACCCCTCAACACATGCAA	59.522	20	100	100	194	321	514
PolynSSR_179	AAAT	4|AHLA_contig_119362:2129-2544|+	N/A	5|TWXB_1.clean_(paired)_contig_97466:2127-2146|-	0.5	0.33	1	CAAAATTCAATCCATTATGTCACATAACAATCAGAGTGACCAAACTCAAGCTATGTGACCCAAGTTATCAAATCAAGGTTGGAGGACTCAAACAAGTGAATGCCTACAATTTAAAAACTAAACCAGAATCAAAGTCTTTAGACCCAAATCATGAAACCAAAGAGTCTTGGTACAAGTAGAGGTAGAAGCAAGACAAACAC	GAGAAGTAGTAGATTTGACCTCCTATAATGAAGAAATGGAGATAGAAGTCAATTCCAACAAGATGGAGGAAGAGCAAGATTAGGTGTTAGAAAACTATGATTATGAAAGTAGTGACACAGACACCAAAGATTGGAAAGAGAAGAAAGACGTCGAATATTGGGACTAATACTTTCTTTGAGTTAAAGACAATTTGCATTTT	GAGGTAGAAGCAAGACAAACACA	58.873	23	100	100	GCTCTTCCTCCATCTTGTTGGA	60.027	22	100	100	113	378	490	AGAGGTAGAAGCAAGACAAACACA	60.142	24	100	100	GCTCTTCCTCCATCTTGTTGGA	60.027	22	100	100	114	377	490	AGGTAGAAGCAAGACAAACACA	57.849	22	100	100	GCTCTTCCTCCATCTTGTTGGA	60.027	22	100	100	112	379	490
PolynSSR_180	AAAT	4|AHLA_contig_12091:2035-2450|+	7|SCEM_1.clean_(paired)_contig_9040:1691-1718|-	3|TWXB_1.clean_(paired)_contig_106499:517-528|+	1.7	0	0.97	ATTTAAAGGTAAAAGAATGAGATCTAATTCAAGCGCACACCTCCAAAAGGAAAAAGAAACAACTTGCCGCTAAAAACTCAAAATTTGCTATGATTTCTAGAAAACAAATGGATCATAAACTCCCCATCATGACATATGAGAAGGAAAACAGACTCAATTCAATAACTAGAAGAATCTCAGTCCAGCCATCCACATCATTA	AATCACTTTTACCATTTCATTGGATTTCTCAAAAGACCAGAAAACAAAAATCTACGCACAAAGTCCAATTTTGATCAAAAGCCATCTCCCAAAACGCTATTGAACTCATGAATAATCATTAAAACACCGTTCAAACTCAATGGCAACGTAACAACTCACAAGATCAAAACTTTACACCAAAACAAGCAGGTCTCATTTCG	CAGTCCAGCCATCCACATCA	59.746	20	100	100	AGCGTTTTGGGAGATGGCTT	60.251	20	100	100	137	377	513	TCAGTCCAGCCATCCACATC	59.457	20	100	95	AGCGTTTTGGGAGATGGCTT	60.251	20	100	100	138	376	513	TCTCAGTCCAGCCATCCACA	60.545	20	100	85	AGCGTTTTGGGAGATGGCTT	60.251	20	100	100	140	374	513
PolynSSR_181	AAAT	4|AHLA_contig_130329:406-821|+	N/A	3|TWXB_1.clean_(paired)_contig_11438:4399-4410|+	0.5	0.33	0.96	TTGAGAGAAATGATCAAATTTTTAAAGACATAAATTGAAGGAGCGACTCAACAATATTAAAAGTAGTCCTGATTTTCAAGGGTAAGAAGGAAACAAGAGTAATGCATGAGAGTTCATGCACTACTCAAACATTGGCTAGATATGTGTAATGTTTCTAAGCCATCCAATAAGATGATGCCGCTTATCTTCCTCCCAAAAAA	AACGTTTCTATTCAACTTCTATTTTTTGTCTCCACATCTGCTGAATGGTTGCTTTATGTTTGTATATTGTTGTTTGTTACATTCTTTTTTTTGTCACTTTATTTTTTATTGTATTATTAGTACACGGTAGAGGTGTAAGTGATACACTACTACTCACAGACTACTCGAGTTTGATTCGAGAAAAACTCGAACTCCACTCG	GCCGCTTATCTTCCTCCCAA	59.82	20	100	85	TCACTTACACCTCTACCGTGT	58.132	21	N/A	N/A	182	376	557	GCCGCTTATCTTCCTCCCAA	59.82	20	100	85	CACTTACACCTCTACCGTGT	56.61	20	N/A	N/A	181	376	556	GCCGCTTATCTTCCTCCCAA	59.82	20	100	85	ATCACTTACACCTCTACCGTGT	58.571	22	100	50	183	376	558
PolynSSR_182	AAAT	4|AHLA_contig_132588:662-1077|+	2|SCEM_1.clean_(paired)_contig_47813:2578-2585|-	2|TWXB_1.clean_(paired)_contig_36142:1686-1693|-	0.94	0	0.98	CTAAAAAAATTAATCTGCTTAGTCTAAAACATAGCATTCTCTCCAAAAAGAACAAATTTTTAATTGGATGCCACATTTAAGAAAACTGCAAGACTCCTCTGTTAATATCAGTGCCGTTGCATTTAAATTATGAAGATGATAAGGGGAAGGTGCACGCTATTTGAATTGAAGCTCGTTGTCTGCATAGCATGCATTTTAAA	AAAGAATCATATCAGAAGATTTCTGTGACTTGCATCCTAAACCTAATGCATTAAATTAACAACAGTTCATGCTTTGATTATCAAAACCAAAGCCCACGTACCACCATTATAATTCCATTTGTCATTCAAGAGTTATGCTGGCATCAGTCAGTGGCATTTATCTCTACAACCCACAGTCACTATCCCTTGCCCCCTAGACA	AGCTCGTTGTCTGCATAGCA	59.753	20	100	100	TGGTACGTGGGCTTTGGTTT	60.107	20	95	100	150	369	518	AGCTCGTTGTCTGCATAGCA	59.753	20	100	100	AATGGTGGTACGTGGGCTTT	59.888	20	94.4	90	155	369	523	GGGAAGGTGCACGCTATTTG	59.548	20	100	100	TGGTACGTGGGCTTTGGTTT	60.107	20	95	100	176	343	518
PolynSSR_183	AAAT	4|AHLA_contig_134059:158-573|+	2|SCEM_1.clean_(paired)_contig_107643:1105-1112|+	N/A	1	0.33	0.98	AAATTAGATAAAATTAATGTGCAGCTATTTTGCAGATTTAATCTCACAATCCCCTACTTGTGACATGCCTTTTTGAGAAATTTGTTGTTGTGAGGTTGTTGAGACATTTACCGCACCTATGTCAATGAGTCTAACTATGATTTACATGCATCAGAATGTAAAAGAACCACAGTGAATTTGAAAGAAGGTGATAAAATTTA	TGGAAGCATGCCAATGTGAAATGCTCTTCCAAAACCTGGGAGTCTATGTTGTCCATGGGATTCTCCTGGCTTGCTTCACTTTGGTTTCCATGCTGATGTTCATCCACATTTGTATTTCTCTCCTGGCATTAAAACATGATGAGTTGAGAATAATAAAAATCAACATGGAAGTCATTTACTTGCCCATGGAATCTTTTGTT	TCCCCTACTTGTGACATGCC	59.382	20	100	100	AGCATTTCACATTGGCATGCT	59.447	21	100	100	192	206	397	CCCCTACTTGTGACATGCCT	59.379	20	100	100	AGCATTTCACATTGGCATGCT	59.447	21	100	100	191	207	397	ACCGCACCTATGTCAATGAGT	59.445	21	100	100	AGTGAAGCAAGCCAGGAGAA	59.233	20	100	100	187	266	452
PolynSSR_184	AAAT	4|AHLA_contig_134120:412-827|+	N/A	2|TWXB_1.clean_(paired)_contig_20295:3797-3804|-	1	0.33	0.95	CACCCATAGGTTTCTTAATTTTGTAGAATACATGTCCAATTTTTTTTACATATAGCAAAAGCTCATGACATACTTTTTACACTTAAAATTGTAGTTAACTACAATACATGTTAGAATGACCGAAGAATCATCAAATTCAACAATAGGTCAAGTTGTCGAGGGAGGGAGCACCAAGTAAGCAAGGGAGAAAATGCTCAAGC	AAAACTAACAAAATAATAATTCACATGTTAGTCAACACATGCTTCATTTTTTTAATAACTGAACATGCATCTATTGTATGGTTTTCCATGATTGAATTATTGTATTATATTTTTTTTTCTAAATCATAATAGATAACAATACCTGCCCAAATGCTCCAAGTATCCATCCTTCCAAGAGCAGTCTAGGTGAGAAGACCAAA	AGCAAGGGAGAAAATGCTCA	57.408	20	100	100	TTGGAGCATTTGGGCAGGTA	59.592	20	95	100	198	377	574	GCAAGGGAGAAAATGCTCAAGC	60.673	22	100	95.45	TTGGAGCATTTGGGCAGGTA	59.592	20	95	100	197	378	574	AGCAAGGGAGAAAATGCTCA	57.408	20	100	100	TGGAGCATTTGGGCAGGTAT	59.369	20	95	100	197	377	573
PolynSSR_185	AAAT	4|AHLA_contig_138998:1230-1645|+	3|SCEM_1.clean_(paired)_contig_34344:8248-8259|+	N/A	0.5	0.33	0.98	AGGGTTTTAACAACAAATACAAACTTCATACTAAAAGCAGATCAACATTAGAATTGCACAGAGGTCTTGACAGCCAGGTACCAGTACCACCAACTGGCAACACATCGATCATACTAGCTATTTTAAACATGCTGGAAAAGATAAACACACNNCAGATCCCTGAGTACGCTACATGTAAGCAAGAAAGTCAACCACCACAA	AAAAGAGATCGACATTCCTGATAGTGAAGTTGCAATGACAAATGCACCACAAAATTTTCTTCAAGTAGATTATCATCCATCTTCATTATTTGGCATTCAAACAAAGAGTAGCTCATGCAATTGCATATCAAATAAAGCACATGACCTTGATGCTCAGAACACTTCATTTGAGCAACCTAAAAGCCCAATTTCATTTCAAG	CACCAACTGGCAACACATCG	60.04	20	100	100	TGTGGTGCATTTGTCATTGCA	59.588	21	N/A	N/A	180	287	466	ACCAACTGGCAACACATCGA	60.179	20	100	100	TGTGGTGCATTTGTCATTGCA	59.588	21	N/A	N/A	179	288	466	TACCACCAACTGGCAACACA	59.744	20	100	100	TGTGGTGCATTTGTCATTGCA	59.588	21	N/A	N/A	183	284	466
PolynSSR_186	AAAT	4|AHLA_contig_14043:1123-1538|+	N/A	5|TWXB_1.clean_(paired)_contig_97900:1689-1708|+	0.5	0.33	1	GGCTTCGTTAAACTAGTTAAGCATTGATTAATTGACATTATACTAATATGCCAGAGGCGCCAAGGTTGACAATTAAGCAAAACAAATTCAAGTACCAGGGCAACAAGACAACAACGTCAGAAACGTGCCAGTGGGATACCATAACTAAAATTCAAACTCAATGCCGCGTTTCCAGGGACTAAAAATTTTTACTCACCAAC	AATAAGGGAGTTTTCTGCAAATTCTCAATGGGATTTCAAATAATAATGAAAATTAGGAGAAGTGGGACCCACTGACCATGGATAACGGCGGCGAGGCTACCAGCGGGGAGGTGATCGTAGACGACGAGCTTCTCATCTTTGGAGTAGTAGTATGCTCGGAGGGGTAGTACGTTGGCGTGGACCGCCACCCTCCCTAAGGC	AAACTCAATGCCGCGTTTCC	60.04	20	100	100	CGCCGTTATCCATGGTCAGT	60.179	20	100	100	153	353	505	CCGCGTTTCCAGGGACTAAA	60.321	20	100	100	CGCCGTTATCCATGGTCAGT	60.179	20	100	100	143	363	505	CAGAAACGTGCCAGTGGGAT	60.606	20	100	100	CGCCGTTATCCATGGTCAGT	60.179	20	100	100	189	317	505
PolynSSR_187	AAAT	4|AHLA_contig_141106:175-590|+	N/A	2|TWXB_1.clean_(paired)_contig_114987:536-543|-	1	0.33	0.98	AGTGTAACTACAATGCCTACGGAAAAGCCAACTCATTTAATTTCTCAAGCAATCCCTCTCCATTGACTTGATGACTTTGCCGGCAATGCAAGGGACTCATTTATTTACATGCATGCAATGCATTGCCTAAAGTTGTTAACTTGGAGACATTAACTTTTATTTATTTCTCTTTCTCTCTATTTTAAAGTATGCCGTAAAAA	TTGATTGGGTTTTTGGGTTCCTTTCATGTGAGTGCAAGCATCATGCTTGCAAGGAAAAGGAGATAAGAATGGTTCAACACCTTGTGCCTCATGAAAAGAAAGAGACAGCAGAGACAAAAGTAATAGAAAAAGGACAACCAAGTCAAGCTATGGAATCCAATTCCCCACCCTCTTTACTGTTTTTATATTTCTCTTGTTTT	TGATGACTTTGCCGGCAATG	59.473	20	100	100	GCATGATGCTTGCACTCACA	59.476	20	100	100	194	242	435	CTTGATGACTTTGCCGGCAA	59.402	20	100	100	GCATGATGCTTGCACTCACA	59.476	20	100	100	196	240	435	GATGACTTTGCCGGCAATGC	60.803	20	100	100	GCATGATGCTTGCACTCACA	59.476	20	100	100	193	243	435
PolynSSR_188	AAAT	4|AHLA_contig_146707:322-737|+	5|SCEM_1.clean_(paired)_contig_100782:1140-1159|+	5|TWXB_1.clean_(paired)_contig_150728:694-713|+	0.47	0	0.98	ATTTGCACTCATTCATAGATGTTGGTCATTCCACTAACATTAATTAACATGAAAACATAAGTAAGAAACTTGGGGAAGGTGTTTCTCCAACATAAAACTCTAGTGTGCATCCACTTCGGCAAAAAACAAAAAGTTGATGGTTTTATATCCCACACACGGGACATGACACACAAGAAGTTCTTTTCAAACCACCACACAAA	AAAGAAGATATGATCAACAATTAATTTATATACATATATACATATCTATGTGATTAAGTGCATGATATACCTCTATTATTAGAAAGCAATCCAATATCAATTAATTAAATATATCTAATGTTGACGTTTGATTTAGTGCATGGAATATCCTTATTATTTGATAAACCAGGCATCAATTAATTAAATATTTTAATATTTAA	CGGGACATGACACACAAGAA	58.122	20	95	100	GCACTAAATCAAACGTCAAC	53.538	20	100	100	199	356	554	GTTCTTTTCAAACCACCACACA	57.819	22	97.5	90.91	CCATGCACTAAATCAAACGTCA	57.582	22	100	100	183	376	558	GTTCTTTTCAAACCACCACACA	57.819	22	97.5	90.91	CCATGCACTAAATCAAACGTCAAC	59.383	24	100	100	183	376	558
PolynSSR_189	AAAT	4|AHLA_contig_153470:315-730|+	5|SCEM_1.clean_(paired)_contig_50131:2957-2976|-	N/A	0.5	0.33	0.99	GTAAATAGTGACAATTTTTTTTGTTACTAGTAATATTTGTATTAGTGGACATTACTTTGTATAATGTTATTTAGAGATAGTTTCAATCAAATTCTATCACAAAAATAAAAGTTATATTTGATAAACATTCGGTTACTAACGTGTTAATTATTGTCATGAACAAAATTATTAATTTAAAGATAATGTTGTCACAAAAGATA	ATATCACCAAAATGTACAAAATCCTAGTTTCAAATATATAAAATTGGAAATTTTTATATCCAAAATATAATTAAAATATTATCCTAAACTACTCTCCAATGTAAACTTGGAGATGAAGTACTCCATTATATTTCAAACTCCTTTTTTGTTTTGCACTTATTCCCTCTTCTTGATGCTTATTCTGCACATTTTTTTTTTTT	Primers not available
PolynSSR_190	AAAT	4|AHLA_contig_153641:204-619|+	5|SCEM_1.clean_(paired)_contig_2730:877-896|+	N/A	0.5	0.33	0.97	TAACCGTCCGTAAAGCCATCGATAGCGTTTGGTGCTTGGTTTTCCTTGAGCCCATTAGTAATCTCTCATCTTATTGTCCTTCAATTCATTAAAAATGATGTTCTTGCTAGTAATGCTAGCATAGTTGCTAATGATTCTGAGCCTCAATGTAGAGTGTCTCACTCGGAAATGGCAATAAACATTGAATGTGTATTTCAACA	ACTAGCTATTAACCTTTTGGTCTATTGGTACCAAATTTCTTGAATATATGTGCTTGTGTCCCCATCAAGAAGGGAGTTTGAACATCGGTCCACATATATAAGGCGAGGGACTATATATGTGCGTTGAGGGATTAACTACTCCAAGTTAATGCACTTTCTTAATGTGGCTTGTTAACACTTTGTTTTTTTTTTAAAAAAAA	TGTCTCACTCGGAAATGGCA	59.315	20	100	100	GGACCGATGTTCAAACTCCCT	59.997	21	100	100	153	354	506	TGTCTCACTCGGAAATGGCA	59.315	20	100	100	CTCCCTTCTTGATGGGGACA	58.711	20	100	100	138	354	491	TGTCTCACTCGGAAATGGCAA	59.928	21	100	100	GGACCGATGTTCAAACTCCCT	59.997	21	100	100	153	354	506
PolynSSR_191	AAAT	4|AHLA_contig_155195:98-513|+	6|SCEM_1.clean_(paired)_contig_112951:2971-2994|+	N/A	1	0.33	0.98	GCTTAATCTGTCAAGTCTAGCTAGGGAGATGAAAATGAAGCTAAACAAACTTTAATTAGGTCTAGAGCATGCCATTACATAAACTAAAGAAAGGGAATGCTGTGACTTGGATGCCAATCCCTAGTTATTAATTTTTATGTTAATGCTAAGAAGGTGCTTAGTGTAACATTATTTGCTTTTGTGACATTGACATTGTTGGA	AAAGTTGAATTATTTGAACATTCTTTTCAAGAGTTTTATCTTTATCAAATTCATGGACAGGAAGTGAAAGATTGCATGTCTTTGGAAAAAGATCCAAGAATATATATATAACAATGCAAGAAAGAATACACATCTCAAACTCAAGCTTTTGAAGTGGGTTAAGTCTCATAATGCTTTTCTTTAGAATAAATGATAATATA	ATGCTGTGACTTGGATGCCA	59.961	20	100	100	GCAATCTTTCACTTCCTGTCCA	58.851	22	100	100	195	193	387	ATGCTGTGACTTGGATGCCA	59.961	20	100	100	TGCAATCTTTCACTTCCTGTCC	58.851	22	100	100	196	193	388	TGCTGTGACTTGGATGCCAA	60.179	20	100	100	GCAATCTTTCACTTCCTGTCCA	58.851	22	100	100	194	194	387
PolynSSR_192	AAAT	4|AHLA_contig_183:1316-1731|+	3|SCEM_1.clean_(paired)_contig_66863:601-612|+	N/A	0.5	0.33	1	ATCATTGATCCAGGCTTCTGATTTGGAGCACCTCCCCAGCACAGCTTGCTTTCCAGAATTGCTCCTCAGTACACACCTTCCACTCAATGGATGGTACAACATCTTAAATTCTGGTACTTGATCTTGTATAGGTCCTGCATCATATATAAAATATTAATCTAACTGTAAATCATGAAAATTTATAAAATATTTATGCAGAC	AATGGTACTATACCAATGTAGGGAACTTGTACAGATGAAAGGATTCTTAGAATTGTGACATTCCTTGGTGATCCCCAATCATATGATAGCACTGAGAAAGCCTCCTCCATATCAGGTACTCCTTCTCTGATATAATAGCTTCCTTGTAATGCCCAAATAGCCCAATCAATGTCTAACTCAATTGCAAATGCCAGAAAACA	GCTCCTCAGTACACACCTTCC	60.067	21	100	100	TCTGTACAAGTTCCCTACATTGGT	59.404	24	100	100	191	260	450	GCTCCTCAGTACACACCTTCC	60.067	21	100	100	TCCTTTCATCTGTACAAGTTCCCT	59.402	24	100	100	199	260	458	GCTCCTCAGTACACACCTTCC	60.067	21	100	100	CTGTACAAGTTCCCTACATTGGT	58.093	23	100	100	190	260	449
PolynSSR_193	AAAT	4|AHLA_contig_19009:3951-4366|+	5|SCEM_1.clean_(paired)_contig_64182:1213-1232|-	N/A	0.5	0.33	0.97	ATGTACATTCAGAAGAGTTAGAGCAACTGTTTGGCACCAACACAAAATGGTCCATGTATGTTTAGTGGAGTGCATGGTCCACACACATTTGATGAGCAAAAGGGTGTGGCTGAGTCCTTTTTAGGTTGTTCATTATGTCAAGCAAGAAACAGCTTGAAAGACATTTCATTTAATGGAAACAATGTAGATAGGTAGATAGA	AAAATAAAATGAAATGAAATAAAGAAGGACCTTATGGCTAGCCATTGTTTCAAGCCACTCAGCAATGGTGAAGAGGAACACAATGAATCCCGCTTCTTCATAATCCCTCAATGCAATTGCTCCTCCCACTGCCATTAATCACCAAATGTTATGATAAATCCATAGCTTGATTTTCTTGTCTTTATTTAATATGTGGTGTT	ATGAGCAAAAGGGTGTGGCT	60.179	20	100	100	ACCATTGCTGAGTGGCTTGA	59.889	20	100	100	194	291	484	ATGAGCAAAAGGGTGTGGCT	60.179	20	100	100	TCACCATTGCTGAGTGGCTT	59.889	20	100	100	196	291	486	ATGAGCAAAAGGGTGTGGCT	60.179	20	100	100	TTCACCATTGCTGAGTGGCT	59.889	20	100	100	197	291	487
PolynSSR_194	AAAT	4|AHLA_contig_2428:1019-1434|+	N/A	2|TWXB_1.clean_(paired)_contig_98565:1247-1254|+	1	0.33	0.98	AACAGGAAGACACTTTGGGAAATGCAAACGCCACAGGTAACTAATAGAGGCGTTTTTACAATTTGGGATTGGCTATTGTATTAAATACATCATTCGAGAAATGAGAAACCATTTTTGTGGAATTATGTGCAGGTTATCAAGCCTGATGTGCTTAAACGAGGTTTTGAGCTTGTTAACAGGTATGCCTTCCTTTCTTTTGC	AAGAGGATGGGTTTTAACTGTCAAATAATTCAGTTCCCATATGCAAATTCAGATTATCATGAATGCCACATTTTGGATTTTCTTATGACTTCAGATGCCGTTAGTCTCAATGTATCTTGAAAAGATCATTAGTCAGCTTGCCCAAGAAGAAAATAACTAGAATTTTATGCATGAACTTGGGTTATCATGGTATCAAATTA	GCTTGTTAACAGGTATGCCTTCC	59.871	23	100	100	TCTTCTTGGGCAAGCTGACT	59.233	20	100	100	199	367	565	GGTATGCCTTCCTTTCTTTTGCA	59.742	23	100	100	TCTTCTTGGGCAAGCTGACT	59.233	20	100	100	188	378	565	GCTTGTTAACAGGTATGCCTTCC	59.871	23	100	100	TTCTTCTTGGGCAAGCTGACT	59.856	21	100	100	200	367	566
PolynSSR_195	AAAT	4|AHLA_contig_26228:4087-4502|+	2|SCEM_1.clean_(paired)_contig_44745:1947-1954|+	4|TWXB_1.clean_(paired)_contig_102178:2241-2256|+	0.94	0	0.98	AAGTTAAGCCTTAATTTTTCCATGATAACAGTAACATCTCAGAAAATGCAAATCAACATCTAATGCCAGGTGATCATGAGAACTGAGAATTCAATATCAGTCTACTGAATTATGAGTAGAAAACAAGAATTTTTGTTCTTCAATCTACATTAACGAATCACGCAATTAGTATTGCAGCTGCTGTGAAGCTCCATTAACCA	AATCACAATTACTGAACAAAAGATGGGTAGTGGATTCAGACCTCATGAACACAATGCTCCACAGCCAGACGTGCCAAGAGGTCATGAGAGGTTTGAATGGCAGAGTCCCAGAGACCATCATGGGCAGGGAAAGCACCATAGAATGAACCAAGCTCCTCGAGCCGGGCCACAAGCAGACTGAAATGCCGGCCTTCATCCCG	TATTGCAGCTGCTGTGAAGC	59.193	20	100	100	CTTTCCCTGCCCATGATGGT	60.033	20	100	100	180	369	548	TATTGCAGCTGCTGTGAAGC	59.193	20	100	100	TTTCCCTGCCCATGATGGTC	60.033	20	100	100	179	369	547	TATTGCAGCTGCTGTGAAGC	59.193	20	100	100	ATGACCTCTTGGCACGTCTG	60.037	20	100	100	132	369	500
PolynSSR_196	AAAT	4|AHLA_contig_26288:5387-5802|+	3|SCEM_1.clean_(paired)_contig_143625:196-207|-	N/A	0.5	0.33	0.97	TATAAAATACTGAAGACATTTTTAACATTTAACAAAGGTGGAAATTGAAAGAAATGAGATGGCTGAAAGATGTACCCATTGTGGCCCCCATGTCCACCCTTTGGCAGTAAGCGTAATTTTGCAAAAGGCAAATCAAGATCATCATACATCTGCAGATAGAAAGGCATCATGCCAGAAATAACTACTACCAACTTTACAAA	AATAAACAATCAGGGAGAGATACCAGACCAGGACTACTTGATTAAGCGGAACATTGAAATACGAAACAATTGATCCAACCTACATCATCAAATCATATTTGCATCATAACTTCAAGAAGAGGGAGCTGACACGAGAGGTACATCAGTAAAGATATGTGGACTTACAGACTCACCACTTGCATTCATGAAAGTTTGCGGTT	TCCACCCTTTGGCAGTAAGC	60.251	20	100	100	CCTGGTCTGGTATCTCTCCCT	59.781	21	100	100	156	292	447	CATGTCCACCCTTTGGCAGT	60.54	20	100	100	CCTGGTCTGGTATCTCTCCCT	59.781	21	100	100	160	288	447	TGTCCACCCTTTGGCAGTAA	59.153	20	100	100	CCTGGTCTGGTATCTCTCCCT	59.781	21	100	100	158	290	447
PolynSSR_197	AAAT	4|AHLA_contig_28857:435-850|+	N/A	5|TWXB_1.clean_(paired)_contig_3675:3227-3246|-	0.5	0.33	0.99	TATGAATATATAGTTCATTTTTCCCATTTTGTCCACTTCTCTCTCCATCTATTAAGATTGTGCATTTAAGACAATAATAATGGAGAACAATGTGTGTAAGATTAAATTTGTAAATTCACGTTTAAATTAATTAAGTAGACAAATAATTTGGGGCATTAAGCTTTTAAAAAAGGACACTAGGATGGAGGGAGTATATATCA	TATATGAAAGAAAGATGGACACAAAACCTAATTAAAAGCAACCTCATCCTTACATTATTTGGTTTCAAAGATTAGATTTTATAAAAATCAAATACTATCTTTTGCATTAAAAGAAATTGTATATTATTCGAATTGAACTGATAACACAATGAAAATTAGGGAAACTAAAACATGGCAACAAAATTGTAAATCAAGCATAA	AGGACACTAGGATGGAGGGA	58.68	20	100	100	TGTAAGGATGAGGTTGCTTT	54.545	20	95	100	100	370	469	AGGACACTAGGATGGAGGGA	58.68	20	100	100	ATGTAAGGATGAGGTTGCTT	54.303	20	95	100	101	370	470	AGGACACTAGGATGGAGGGA	58.68	20	100	100	AATGTAAGGATGAGGTTGCT	54.303	20	95	100	102	370	471
PolynSSR_198	AAAT	4|AHLA_contig_2913:4456-4871|+	N/A	3|TWXB_1.clean_(paired)_contig_182624:340-351|-	0.5	0.33	1	CCCCGACAAAATTCAGGAAAACAATGCTAATCTAGAAAAATCAAAGAGGGATTCGTGAAAGAAGCGAATGCATCAATTGGGTAGAGATTTGAGCTTACTCTCCGGGCGTCGACATTGGTGATTTCCAAGAGATCGATCGAGAAAAACAGCGATGAAGACGATGAGGTTTTATAGTCTCAAATCGATTTAAAATAGAGAAA	ATGGAACAATTGCGAAGCTTCTTAAAGCTAGCTGCAAATGAAGCACATTGAGTCGTGAGATCTGGATCGGACGGTTGTCAAGGGTGTAGAGGGTGTATGACGTGGTTTCGGATTAACGACCGTCCGATCTACTGATCGGACGGCTATGTCTTGCTACTGACACAACAAAATTTCGGGTTGGAAATCCAGGTCGCTGTTCC	GGCGTCGACATTGGTGATTT	59.198	20	100	100	TTGACAACCGTCCGATCCAG	60.038	20	100	100	193	304	496	GGCGTCGACATTGGTGATTT	59.198	20	100	100	CTTGACAACCGTCCGATCCA	60.038	20	100	100	194	304	497	GGCGTCGACATTGGTGATTT	59.198	20	100	100	CGTCCGATCCAGATCTCACG	60.041	20	100	100	185	304	488
PolynSSR_199	AAAT	4|AHLA_contig_31660:4507-4922|+	2|SCEM_1.clean_(paired)_contig_36482:595-602|+	N/A	1	0.33	0.97	TTTCGAGCGTTAGCTAATGACCCATGTCCATCTCACGATCTTTTCTAGTCTTCTGTTACTAGTCTATAAGTAGGTCTACCGCTAGTAACCTACCCATTTTCTCTTTTGCCCTCTTTTCTTCTTTCTATTGTTTCTCTCCCTATTTTCCCTTGTACTCTATTTCTTATTTAATGAAGCATAGTTTATACGCTTATCTTAAA	AAAAATAGCTCCATGATGTTAACCTTGGTTTTTACTGAATAGATTTAATTTAAAGCTTTGAATCTACAATTTTAATTAGAGGAAATAGAGATCAATAGCTTCTTTGATTTGTTTTCTTACAGTTGAAACTTGATGTTTGATGATTTTGATTTTTTTTTTCAAATTTAAGTCAATTTTATTTGTTATTATTGTTGTCTTTT	ACCGCTAGTAACCTACCCAT	57.533	20	100	100	ACCAAGGTTAACATCATGGAGCT	59.989	23	100	100	168	277	444	TCTACCGCTAGTAACCTACCCA	59.49	22	100	100	ACCAAGGTTAACATCATGGAGCT	59.989	23	100	100	171	274	444	ACCGCTAGTAACCTACCCATT	58.244	21	100	100	ACCAAGGTTAACATCATGGAGCT	59.989	23	100	100	168	277	444
PolynSSR_200	AAAT	4|AHLA_contig_36449:4670-5085|+	4|SCEM_1.clean_(paired)_contig_4672:3834-3849|+	2|TWXB_1.clean_(paired)_contig_48112:5558-5565|-	0.94	0	0.99	CAATAATGGAAGACATGCAATGTTTAAATTTCCCATCTGGATCACACTCACGATAATCGATGTAGCATACCTTGGAGAGGAAGATTGTGTTCACATCAGGGCTGTGCTTGAATGCCTCAAGGATTTTTGTCCTTTCCGGGTGACTGAATCATGTATAGATCAAAAGTTCAATAAAAATGACAGGGAGTTAGGCATAGACA	AACTCATCAAAACAGCCACACAAAAACCTGGTTGCGCCATAGATCATAGGTTTCCGAAGTTTCATGGCATATGCAGTAAGTGCAAAAAGATTATCAGCAAATACTATTATCTTATCACCACGCTGCTGCTCATGAAAGCGAATAAGGAACTCGCATGCCCGGAATTTGTTTGGATTCATAACATAAAGTGCCTGACAATA	TTGTCCTTTCCGGGTGACTG	59.892	20	100	100	TGCCATGAAACTTCGGAAACC	59.389	21	100	100	159	326	484	ACATCAGGGCTGTGCTTGAA	59.889	20	100	100	TGCCATGAAACTTCGGAAACC	59.389	21	100	100	193	292	484	TTCACATCAGGGCTGTGCTT	59.889	20	100	100	TGCCATGAAACTTCGGAAACC	59.389	21	100	100	196	289	484
PolynSSR_201	AAAT	4|AHLA_contig_38215:1253-1668|+	3|SCEM_1.clean_(paired)_contig_24824:207-218|+	3|TWXB_1.clean_(paired)_contig_110402:775-786|+	0.47	0	0.99	TTTAATTATTAGCAGACCCCATCGCATTCTTAAAACAAGTACGACCCAAAATGACATGTTTTCAGAAAACACTAGAACATGTTTCATTTACTTCAAATCAGGAAGGGCCAAAATTTGATCAGTGCAAGGTTCAGCAACTTTTTATAAAGAGGATTAGCAATAGATAGTTGCAAATCTCGAGAAACTTTCATGGAATACAA	AAAAAGTCACTAGGTTCAGAATATATTATATTGACTAGTAGTAGAATAGTATTACAACTTACAAGCAACGTGGTATTGTTGGAATAGATGTTTAAGCAACACCTAAATATGCATAAATGTTCTGAAAAATAATGCTATCAATAGTATCAACAGAGTAAAATATAACTAACAGCATGCTAGGAATAGACATTTATGACCCT	TCAGTGCAAGGTTCAGCAAC	58.976	20	100	100	CCAACAATACCACGTTGCTTGT	59.966	22	100	100	180	318	497	CAGTGCAAGGTTCAGCAACT	58.973	20	100	100	CCAACAATACCACGTTGCTTGT	59.966	22	100	100	179	319	497	TGATCAGTGCAAGGTTCAGCA	60.203	21	100	100	CCAACAATACCACGTTGCTTGT	59.966	22	100	100	183	315	497
PolynSSR_202	AAAT	4|AHLA_contig_41729:501-916|+	5|SCEM_1.clean_(paired)_contig_57992:861-880|+	5|TWXB_1.clean_(paired)_contig_129519:1157-1176|+	0.47	0	1	ATCGCCTCATCAACAGATTGCATCAAAAGATTTGCAGCCGTCTGGTTTATCCTACCCTCTTCAAGCATTCCCCAATAGGCTGATTGCACCCCTACCACAAGATAGTTTGCATCTTAAGAAGTTATACACAAATCAATACGTAAAAGAGCATAGTGCAAACACATCATTTCTTTGCAGGCCATGAGACAATTCAGAAGCAA	AAGACCTTCATTGAAATCATCAAATTCTTTTGAGAAAATCATTCAAATAAGAGGTATAACATCAATCATGAACTTATACAATTTTTCTTGATTTTCTGAAACAAAGGTTTTATCTTGTTGGTCAAGAAGTTTAGAATTTTTCACAAATTTCAGACTACGTGTCAATAATTACTATGGAAATAAACTCCTACATGAGTTTT	GCCATGAGACAATTCAGAAGC	57.582	21	100	100	CACGTAGTCTGAAATTTGTG	52.592	20	100	100	200	377	576	CCATGAGACAATTCAGAAGCA	56.237	21	100	100	CACGTAGTCTGAAATTTGTG	52.592	20	100	100	199	378	576	CCATGAGACAATTCAGAAGCAA	56.959	22	100	100	CACGTAGTCTGAAATTTGTG	52.592	20	100	100	199	378	576
PolynSSR_203	AAAT	4|AHLA_contig_45069:2603-3018|+	5|SCEM_1.clean_(paired)_contig_94646:3964-3983|-	N/A	0.5	0.33	0.99	TTGAATAAAAATTTAAATTTTAATCTCCTAACATTTCAAATCAAAAGCTTTTATTCTACAAGCTTAATCATTTTTAATTGAAACAATCCCAACAACATAGTCATTAAACCTCACAATTCTCTCCGGCCCACTCCTAAAAACTCCTTTGGCCCATATCTAAACTTCACAATATATTTCTTTTAATCTCTCATAAAAAATAA	AAACAAAAATCAAAGATGCTTGAACTTGGCTGGTTTTACACTTGTTTTCTTTGACTGATCTATTTTGCATGAAACAAGACCAAATAAGTACTAAAGTGAATTGAATCCAAAGAGCACTAACACAATGGATAGAGACAAGCAATCATCTTGACTTCATGAGAGAGCTTCTCAATTTGGGATCCATCATTGCCATGCCAATT	CAATTCTCTCCGGCCCACTC	60.463	20	100	100	ACCAGCCAAGTTCAAGCATCT	60.203	21	100	100	137	313	449	CAATTCTCTCCGGCCCACTC	60.463	20	100	100	ACCAGCCAAGTTCAAGCATC	58.749	20	100	100	137	313	449	TCTCCGGCCCACTCCTAAAA	60.546	20	100	70	ACCAGCCAAGTTCAAGCATCT	60.203	21	100	100	131	319	449
PolynSSR_204	AAAT	4|AHLA_contig_4622:2869-3284|+	N/A	5|TWXB_1.clean_(paired)_contig_137267:1688-1707|-	0.5	0.33	0.99	CTTGTTAACTGGTGGCGCATTTTAAATTGATGTCCATCCTTAGAAATTGAATTGTTTTTATTAGAGGCAAAGCTCATTTTATGTAAACAATAGTGCATTTTCTTTTTTACATAACAAACAGCAGAATTTTTCTAGTTTGATGATTTGTACTAGATTCTTAACAATATTTACGCCCATGCAAAACATATGAATGAAATGAA	AAAGACTTCATCAACTTGAGGATAGTGTTTTGGTCACCGCCAGTCGTCGGAAACTGGCAACACACCTGGCCCATGAGTGTCTTACTATTCACAACCTTGGCCTCTGCATGGATGTTACATATTTAGCTCCATCATCTCCTTAACAGAAGATCAACTCTTCTTCATGGTGATTAATCCTCCTCCTCTCTTCTCCTCTCTTT	ACGCCCATGCAAAACATATGA	58.901	21	100	85.71	AACATCCATGCAGAGGCCAA	59.96	20	100	100	163	369	531	ACGCCCATGCAAAACATATGA	58.901	21	100	85.71	CAGGTGTGTTGCCAGTTTCC	59.615	20	100	100	115	369	483	ACGCCCATGCAAAACATATGA	58.901	21	100	85.71	CCAGGTGTGTTGCCAGTTTC	59.615	20	100	100	116	369	484
PolynSSR_205	AAAT	4|AHLA_contig_48163:2363-2778|+	4|SCEM_1.clean_(paired)_contig_11413:1798-1813|-	3|TWXB_1.clean_(paired)_contig_20829:13181-13192|+	0.47	0	0.99	ACAAGAAGTTGCACCTGCACCCCTGCTATCGCATGTTCTCACACAAACCATGTCCCCTGGAGAGAGAGTGGTAGGAGGTAATCTATTGTTTCGCTCAACTCTAAATAATACCAAATGCATACCACCCAAGCCTGTAAAATCAGATCACTAATTATAAACTGTTGATAAGAGAAATATCTAAATAGTGCAAATAATGATTG	ATGGCAAAGGTCAGATTATTGTAGAGAGAGAAGCTAACGTATTTGGGTTGTAAGACTTGAAGAGATAAATAAATTGAATTATCATACTACATGCTTTGGGCACCAAATGAAGACACAAAGGCAACTCCCTTCATGAGCAAGGATGTGACTATCCCCACATCTTCATATTCATGATAATGTAAAGAACCAAAATGGTGAAT	GCATACCACCCAAGCCTGTA	59.745	20	100	100	ACCCAAATACGTTAGCTTCTCTCT	59.533	24	100	100	148	316	463	AATGCATACCACCCAAGCCT	59.664	20	100	100	ACCCAAATACGTTAGCTTCTCTCT	59.533	24	100	100	151	313	463	GCATACCACCCAAGCCTGTA	59.745	20	100	100	ACAACCCAAATACGTTAGCTTCTC	59.306	24	100	100	151	316	466
PolynSSR_206	AAAT	4|AHLA_contig_48492:8426-8841|+	N/A	3|TWXB_1.clean_(paired)_contig_31906:7227-7238|+	0.5	0.33	0.99	TTGCCTCATCCACAGACCTGTACCCATTGCTCTCAATTCCAGCATCCATCTTTGGATCCATGATCTACACTAGTTAAATTTAATGATTAACCACCCATCTAAGACAAAAACACAACAATGGAATTCCAGATAAAATTGAAAAAAATATTAGTGGCTAAAACAACAATTATAAATTTAAAGTTCCAAACCTCACAAAGGAA	AATCAATAAGCAGGGGAACGCAAGAAATCAAATTCTGATTATCTACATTTTTGTTCATTTTGTAATTTTAATTCATCTCAAGTCTTACAACTGTCTCAAGTAGGGGAGGCCCATAAGTTCATAACAAGAACCCAGCAATATATTTGGCTTGAAAGATGTAGTTTTGTTGTGACAATATCCTATTGTGTAATTTATTTAAT	CCATCTTTGGATCCATGATCTACA	58.127	24	100	100	ATTTCTTGCGTTCCCCTGCT	60.251	20	95	100	199	245	443	CCATCTTTGGATCCATGATCTACA	58.127	24	100	100	TGCGTTCCCCTGCTTATTGA	59.673	20	95	100	193	245	437	CCATCTTTGGATCCATGATCT	55.109	21	100	100	TGCGTTCCCCTGCTTATTGA	59.673	20	95	100	193	245	437
PolynSSR_207	AAAT	4|AHLA_contig_51542:694-1109|+	N/A	2|TWXB_1.clean_(paired)_contig_135254:123-130|+	1	0.33	0.6	TTTTATTACGTTCCACAAACAATTTCAAAAAAAAATAAATTGAAATTCCAATGAGCAAAAAACAAATAGCAAAATAATCTCCGAAAAAAAATAAATAATTAAAAAGACCTGCAAGCCACATAATATTGATCATGCATTTGGTATCAGCAGTTAATCCTAATAAGCTCAGGGCCAAAAAAGTCTTACATGTCTACCTTGAA	TCTGAAGTTCATAATCAATTAATTTTAAAAATGGCCTCCAAGCAAATGTAGTATCAGGATATTTTTAAATCATCAAAAGACCAATGCTAGCATTCAAAGAATCAAAGTATTGCAACTCATTAAACTGATTTACCGATAAAATTGGTGAGGCAAAATACTAATGAGTTTAGATGTTGATCCTGCCTACCAAATATTTATGG	AAAAGACCTGCAAGCCACAT	58.292	20	100	100	ACATTTGCTTGGAGGCCATT	58.352	20	100	100	164	301	464	AAAAGACCTGCAAGCCACAT	58.292	20	100	100	ACATTTGCTTGGAGGCCATTT	59.02	21	100	100	164	301	464	AAAAGACCTGCAAGCCACAT	58.292	20	100	100	ACTACATTTGCTTGGAGGCCAT	60.292	22	100	100	167	301	467
PolynSSR_208	AAAT	4|AHLA_contig_5216:169-584|+	N/A	3|TWXB_1.clean_(paired)_contig_103705:683-694|-	0.5	0.33	0.98	TTTACCCTGGAAAAGGAGTAAAATGCTAAGAAGGAGAAGAAAATAAAAAAGAATTATTAACCAAGACTACTGAAAATCAGCTTCTTGAACACCAAAACTTGACAAAATGTTTATAAAACAAATCAGCACAACTAATAAGAAAATTACAAAATCTCTTATTTTAGTTTTAATGAAACAGTTATTTATCTGGTTTTTTTCCA	AATCCAAAGTCTCAATATGATAGAAGACTGGTTTAGTTATAATTTATTTACATCTAGGCTTTATTTATACCCTTTCCATTGCCAAATGCAAATCCTTTAACAGTTGCACAAAAATTAAAATCATATTAAATTTTTTAAAAACTTAAAATGTAAATGAACCAAATAATTAAATTGCTTCTTTTTTGAAATTAGATTTTTTC	Primers not available
PolynSSR_209	AAAT	4|AHLA_contig_54311:5260-5675|+	4|SCEM_1.clean_(paired)_contig_15160:2944-2959|-	2|TWXB_1.clean_(paired)_contig_132335:1529-1536|-	0.94	0	0.98	TTTAAGCAATGAAATTTACATAGAAATTTGTCAGATGGCTGAAAGTTAAAAGTGTACAAGGAGGGTTTCCTTTAAAGACAAATGGAGCAAGAGCTGAAGTAATGCAACATCAACACACTGAAAGATGTCAAATATTAACTGAAAGGCCTGACAACAAACATTAACACATAAAAGCAAAACAGACCCTGCAGCCACTCAAA	AACTGCCTCCTCAGCACCATCAGCAATCCATCTATGCAAGTCAAGCCCTCTAGAGTACAAGGAAGTTGCTTGATGAAATAATCTTCTACCAGGAGTAGTAGAGGAATACCTTGTCAAAAGTTTTGCTGGGGTCCTTCGGAGCAACCATATCTTGACAGGTGATGACACATCCATAAACTTGGAATACTCTCTTAGTTGAT	GACCCTGCAGCCACTCAAAA	60.823	20	100	95	CGAAGGACCCCAGCAAAACT	60.537	20	100	100	173	381	553	AAGCAAAACAGACCCTGCAG	58.965	20	100	100	CGAAGGACCCCAGCAAAACT	60.537	20	100	100	183	371	553	CAAAACAGACCCTGCAGCCA	61.109	20	100	100	CGAAGGACCCCAGCAAAACT	60.537	20	100	100	180	374	553
PolynSSR_210	AAAT	4|AHLA_contig_5449:1824-2239|+	4|SCEM_1.clean_(paired)_contig_54925:583-598|-	5|TWXB_1.clean_(paired)_contig_59248:2043-2062|+	0.47	0	1	TGGCTGAAAGAAATCAAACGGATATGGTCAGCGTCTTGAAGGTAGTCCATAAAAAGATACGAACTAGAGCGAGTGCCCCATAGAAGATTGACTGCCAAGGGTAATGTGTGTTTAATTTTTTAGTAACACTACATATGGATATTGAAGATAACAGACATGAAAATTCTGAAGGAAGCCATCATGAACACAATTATTTCCAA	AAAATAAGAGTTAAGTTTCACACCAGGGTTAAGACCTGCGTTTGAAGTTCATGTGGGAATAACACTGCTAGCAAATAATTAAATATCATAAGGTTAAGTAAGTTTCACACCCTTGAACCCTTTAAAACTCTATTATAGTCTGCACACAATAACCAAGAGGATGAGTTTCAGGGTAAAATATGCCTACTGCTACTGGAAGA	ACTGCCAAGGGTAATGTGTGT	59.855	21	100	100	CCCACATGAACTTCAAACGCA	59.664	21	100	100	183	290	472	GCGAGTGCCCCATAGAAGAT	59.605	20	100	100	TGAACTTCAAACGCAGGTCT	57.674	20	100	100	199	268	466	ACTGCCAAGGGTAATGTGTGT	59.855	21	100	100	TCCCACATGAACTTCAAACGC	59.393	21	100	100	184	290	473
PolynSSR_211	AAAT	4|AHLA_contig_54817:596-1011|+	N/A	2|TWXB_1.clean_(paired)_contig_1359:999-1006|+	1	0.33	0.75	ACAAGATGATTCCTTGGGACTTACAAAGAACCCAATGTTTTGGTAAGGCATCAAAAGAAATCCAAACAAAAGCAAAGCATAACGTAAATAAAAAAGGCACAGCATGGCATGGGATCAGACTGACGTGCAATGCTTCATCAGAACTATCTGACATAAGACAGCCTCTGACATAATGATACTTATCATTGGCATCATTTCCC	AAAATAATTTCCAGCAATAAACGACAGTGGTGTAATATGACTTCCTCTATTTTATTGTGTTTGGGAATGCATTATCAGTTTTCCAGCACACTGAGTGTAATAGCATTAAAAAATGACAACAAGCTAGTAACAAGACAGCAATGCTATTGAACCAAACAAAGCTATCAAGGATTTATATGGCCACAAAGGCCACATGCAAC	TCAGACTGACGTGCAATGCT	59.966	20	100	100	CACTCAGTGTGCTGGAAAACTG	59.967	22	100	100	199	314	512	TCAGACTGACGTGCAATGCT	59.966	20	100	100	ACTCAGTGTGCTGGAAAACTGA	60.093	22	100	100	198	314	511	TCAGACTGACGTGCAATGCT	59.966	20	100	100	ACCACTGTCGTTTATTGCTGGA	60.224	22	100	100	133	314	446
PolynSSR_212	AAAT	4|AHLA_contig_7204:2866-3281|+	5|SCEM_1.clean_(paired)_contig_51643:3341-3360|+	5|TWXB_1.clean_(paired)_contig_53086:2894-2913|+	0.47	0	0.99	ATGTTGAGTAAGTGGCATGTAATCATCAATTTGAGCATTAACGGAATGATAATAGAAGTACTAAATGAAGAATAATAAAATGTTTCTGTAGTATTTGTGGCATAATACATGACTTTTTGCCTCCTTCGTGGGCCACTCGATGAAAACTCTTGATTATCCTACTTGTTCTTCGTTTGACTGCATACACTCTACAACAAAAC	AAAATAAGAAATGGATAGTTTGCTTTTCTTTTGTCTGTTTGCCTTGAATATACTTTACGTAAAAGATTCTAGACTTTACTATCTTTCCATCATCATTGTTTTGTTAGCTCAAGAGGTATATTGAACTTTTGCACCATCATCTTGTACGATCATAACCCCATCTAGGGTAGATTCATGGCTAATCGAAAGGGGAAACAATG	TGGGCCACTCGATGAAAACT	59.6	20	100	100	GGCAAACAGACAAAAGAAAAGC	57.479	22	100	100	131	328	458	GTGGGCCACTCGATGAAAAC	59.478	20	100	100	GGCAAACAGACAAAAGAAAAGC	57.479	22	100	100	132	327	458	CGTGGGCCACTCGATGAAAA	60.953	20	100	100	GGCAAACAGACAAAAGAAAAGC	57.479	22	100	100	133	326	458
PolynSSR_213	AAAT	4|AHLA_contig_76758:1179-1594|+	4|SCEM_1.clean_(paired)_contig_114529:7251-7266|-	5|TWXB_1.clean_(paired)_contig_68998:1982-2001|-	0.47	0	0.99	AAGCAGGCACTTCAGTTGAGCTTCTCGACCCAAAAGTGGCTTTACAGTCATTATCCAATAGTTGACTGACCCCCTCATCGGAGTCACGAAGGTTTATGCAGTTCAATGCCAAATTTTTAGGTGAAGAATGATAACTAAACTGGATAAATCTGGAAAGATTCCCAAGAGCCCTCACAGCGTTTGACTTGATCTGACAATTG	AATTGCTAAAGGTTCAGAATGACAAACATGTGAATTTTTAATGTCGAGTAGAATTCCAATATGTTTAAAGTTTGTGTACCACTATGATATCAATTAAGCATGGCTAATGCATCAAAGACTTTCGGAAAGGTAGCCAAACTACGAAAAAGAGAGGAGATAGGAAGAAAGCAAGCAGGCAGCAACAACAATATCAAAATAGA	CCCTCACAGCGTTTGACTTG	59.412	20	100	100	TGGCTACCTTTCCGAAAGTCT	59.024	21	100	95.24	184	368	551	CCCTCACAGCGTTTGACTTG	59.412	20	100	100	CGTAGTTTGGCTACCTTTCCG	59.002	21	97.6	100	191	368	558	GATTCCCAAGAGCCCTCACA	59.379	20	100	100	TGGCTACCTTTCCGAAAGTCT	59.024	21	100	95.24	196	356	551
PolynSSR_214	AAAT	4|AHLA_contig_78033:1402-1817|+	N/A	5|TWXB_1.clean_(paired)_contig_113674:509-528|-	0.5	0.33	0.98	AATTATATGCATATTTACCGTTAGTTATAATTTAGTTCATAAAATATTATAAATATTATACATTATTAATGTTACACATTAGACTAAATTATCATTCTGTCTTTAATTAAATTTAGATTACCGTTTTTATGAGTTTTAAAATGGCCATTAAACAAATCAAACTAAACAATCACATCCATTCGAAAGAGAACAGTCCAGCA	ATCAAATAATAGGCTACCGCACAATTTATTAATAATATTATGATTAAAATATAAAATTTTAAATAATAGATTAATTCCAGTGATAAAGGGTAAATCAAGCCTTTATTTTTAAATTTAATTTTTTTTGTATTTTAATAAATATAAATAAATCATGTGTCAGTGATAAAAATAAATGAGCAATTAAATTTTACAAATCTTGT	TCGAAAGAGAACAGTCCAGCA	59.313	21	95.2	100	GCTTGATTTACCCTTTATCACTGG	57.863	24	100	70.83	137	379	515	TCGAAAGAGAACAGTCCAGCA	59.313	21	95.2	100	GGCTTGATTTACCCTTTATCACTG	57.863	24	100	66.67	138	379	516	TCGAAAGAGAACAGTCCAGCAA	59.898	22	95.5	100	GCTTGATTTACCCTTTATCACTGG	57.863	24	100	70.83	137	379	515
PolynSSR_215	AAAT	4|AHLA_contig_8365:492-907|+	5|SCEM_1.clean_(paired)_contig_114841:1022-1041|+	N/A	0.5	0.33	0.99	CGACCAACCACACTAGCTCCACATTTAAAGTTAGGTTTGCATGACTTTTGTTTCTTAAATAACAGTGCCAAAGAGTCCCAGGTGTAGGAGTGGGTTTGTAATTTAGTTCCTATAGTGAAAGTATATGACCAAATGATTACATGATCAATTCCCAATTGAGATGTATATATGTCTTTGACTAAGGGCTCATTGTATTTGTA	GAATGAATAACACCCAACAAAAAGGATAAACCTCACAAAACAAACTAGCTATAAAATAAGTATTAGGGTGGAGCAACTTGTCGAAAGATTAGAAATAGGAGTGAAAATGGCACGTTTTACACAAAGTACAGGCATTTCATAGTCAGATCTTTTTAATTGGAAAATTTTAGTATATATAATTTTAATTTAATCAAGTGTAT	TGTCTTTGACTAAGGGCTCA	56.087	20	100	100	CGACAAGTTGCTCCACCCTA	59.68	20	100	100	130	369	498	TGTCTTTGACTAAGGGCTCATTGT	60.202	24	100	100	CGACAAGTTGCTCCACCCTA	59.68	20	100	100	130	369	498	TGTCTTTGACTAAGGGCTCATTG	58.673	23	100	100	CGACAAGTTGCTCCACCCTA	59.68	20	100	100	130	369	498
PolynSSR_216	AAAT	4|AHLA_contig_84770:276-691|+	3|SCEM_1.clean_(paired)_contig_15211:740-751|-	4|TWXB_1.clean_(paired)_contig_133044:4290-4305|-	0.47	0	0.99	TTGAAAATTTAGCTTCTAATAAATACATCTCACCACGTTCTTACATATTGATGTTTGCTAAGCTAAAAGCAAAAAAAAAATTAAAAATAAATACTTTAAGGCATGCCCTGTGACCGTGTCACTCCAACTCTTATTTCCACTATTATGTCATGGCAGCGTATTAATTACAATAGGAAAAGCTATTCTCCACTCAGCCATAA	AATTTTACTCACAATATTACCTGAGGTAGCAACATTAGAAGACCATACAAAGCCTTCAGCAACCAAGTATATTTTCCGGGCTCCAGAAGCTTCAATGTTAAAATATTATGTTAGTCTACAAATAAAATTATCATAAAAGAGAAAATATTGAAACATAGGATCCCACAATGGTAGACAATGCCGCCATGAGAACAGTTTCC	TGACCGTGTCACTCCAACTC	59.612	20	95	100	GCTTCTGGAGCCCGGAAAAT	60.681	20	100	100	196	310	505	GACCGTGTCACTCCAACTCT	59.325	20	95	100	GCTTCTGGAGCCCGGAAAAT	60.681	20	100	100	195	311	505	TGACCGTGTCACTCCAACTC	59.612	20	95	100	GCTTCTGGAGCCCGGAAAA	60.303	19	100	100	196	310	505
PolynSSR_217	AAAT	4|AHLA_contig_86062:1031-1446|+	3|SCEM_1.clean_(paired)_contig_19808:2004-2015|+	4|TWXB_1.clean_(paired)_contig_80396:5206-5221|-	0.47	0	0.99	GTCACACCTACCTATAAAATCAGTGACAGTTTGACAACTTTGACTAACTAATGTAATTCCAATGAGCTGCACGTATAGGAAATAATAAATGGCATAGTGAAGTAGATATGAATTACATTCCCCTCACTTGTGAGTTGTGAACAAAGAATAAGTAAAGGCATGAAACCAAAAACATTTGGACTGTTTATGAACCCAGTTTA	AAACATACAAATCAGGGATCATGATATCAAACCTTGAAAAGTTTTTTCACAAGTTCTTGTGATGAGTCCCAAGGTTTCATACATAATGGCAGCTTCATTTTAACAGTTTGTGGAGGAAATCTGGCCAGCAAATCTGATATATTCCAGGAAAGTTATTGTAGCATTTGAAATAGGATGCATTTATTTCATGATAAGAAAAG	CCCCTCACTTGTGAGTTGTGA	59.859	21	100	100	TGAAACCTTGGGACTCATCACA	59.559	22	100	100	176	319	494	TCCCCTCACTTGTGAGTTGTG	59.859	21	100	100	TGAAACCTTGGGACTCATCACA	59.559	22	100	100	177	318	494	TCCCCTCACTTGTGAGTTGT	58.493	20	100	100	TGAAACCTTGGGACTCATCACA	59.559	22	100	100	177	318	494
PolynSSR_218	AAAT	4|AHLA_contig_91050:11-426|+	N/A	3|TWXB_1.clean_(paired)_contig_101160:2912-2923|-	0.5	0.33	1	GGGTTCCACAAACCTGAAAAAACAAATATATACAAGGGATGAAATCTATGCCTCTCATGAGCATCAAAAGATTTCAAAAGAGAACCATTGGCTTTATAAAGTTAGATGGCCTGTGGAACTTATCATTGATTTGGTTTAAATTGGAAGCACATGGATGGGCCATCACACAATCCTTAATTGCCCTGCTAAACCTGAAATAA	AAACAATTAACAATAAACAATAAAGAAACATGCATGCGAAGTGATGAAGTGACTCCTAACATGATCTGCATTCAAACTTCAATTCAAGTAATCAAACACACCTACCAACCTTTTTTAATTTTCATAACTGCCAAGCCTCTAACTGTTCCTTGTTTAGTCTTTACAAATCATCTCTTATCGCTCTTCTTTTAACTTCAGCA	TGGATGGGCCATCACACAAT	59.664	20	100	100	CACTTCATCACTTCGCATGCA	59.534	21	100	100	116	161	276	TGGGCCATCACACAATCCTT	59.591	20	100	100	CACTTCATCACTTCGCATGCA	59.534	21	100	100	112	165	276	TGGATGGGCCATCACACAAT	59.664	20	100	100	TCACTTCATCACTTCGCATGC	59.266	21	100	100	117	161	277
PolynSSR_219	AAAT	4|AHLA_contig_95023:1331-1746|+	N/A	5|TWXB_1.clean_(paired)_contig_135309:2806-2825|-	0.5	0.33	1	AAAAATATAAACGAACACCTGGTAGCAAATTCATGTGAAGCTGCATTAGTATGTTCACAAATAAGGGTTCTGCCAAATAAAAGTTATTAGAGAATATGCAAAGACAAGCATGGAAGATGATACTAAGTTATTAAAAAAAGGAGTCAAAACTTGTACTTAAAAGGATTTAATGTACAAATAGCTGCAAGAATAAAGTTTCA	AAGCATTTTACAATTTCATGGAGAAACAACAGAGGCCAGCATTTCAAGTACCAAAACTTCCAATATTTTCTGTATCATCGAACATTGGTATTGGGGCATGCTCATACGCCAAATGGTAAAATTTCAGCCATAAACAAGATCTAAAAAATTATAGCACACAACAAACTGAATAGACATAGACATCAAATTTTTCAATGTAA	TGCAAAGACAAGCATGGAAGA	58.415	21	100	100	TGCTGGCCTCTGTTGTTTCT	59.817	20	100	100	161	296	456	TGCAAAGACAAGCATGGAAGATG	60.057	23	100	100	TGCTGGCCTCTGTTGTTTCT	59.817	20	100	100	161	296	456	TGCAAAGACAAGCATGGAAG	56.908	20	100	100	TGCTGGCCTCTGTTGTTTCT	59.817	20	100	100	161	296	456
PolynSSR_220	AAAT	4|AHLA_contig_99537:3993-4408|+	2|SCEM_1.clean_(paired)_contig_143717:161-168|+	N/A	1	0.33	0.7	GACATGCCATTTTTAAAATAAAAAAATTTCTGATCATGGAGTTCTCAGATCATTGTACAAAGAAAAAAGGTATTCCAAACTAATATTAACTTACCTGAAAAGGGCCATCAGGTTCCACGTCCCCCACTAATTTTTATTGCAAAACAGTTTGTTGGTTTTTATTCCACGTATGGAGATCTTTAGAGCATTGAATTGAGGAA	GAAAATAAAAATTTCATCAACACGATTTCTTTCATTTTCTTTCATGTGCTTTAAACCAAGCACATCGTCAAGGAAATATTTACGAGTGTCTTCCCAAAATCAATCAGGCAAGCAATGTTTCAACACAGGATGACTTTTGCTGTTTTCAAGGAATTCAATTTTGGAAGAAGCACGTTTGGATGGAGAGCAGACACAAGCAA	AAAGGGCCATCAGGTTCCAC	60.252	20	100	100	TCCTTGACGATGTGCTTGGT	59.604	20	N/A	N/A	192	298	489	AAAAGGGCCATCAGGTTCCA	59.513	20	100	100	TCCTTGACGATGTGCTTGGT	59.604	20	N/A	N/A	193	297	489	AAAGGGCCATCAGGTTCCAC	60.252	20	100	100	TCCTTGACGATGTGCTTGGTT	60.203	21	N/A	N/A	192	298	489
PolynSSR_221	AAAT	5|AHLA_contig_107805:2507-2926|+	4|SCEM_1.clean_(paired)_contig_75576:4179-4194|+	N/A	0.5	0.33	0.99	AGAAACCAAGCAAATTGAGATAAAACTCCAATCAAACCTAAAATCAATCCATGATTTCTGTCGAGTCTAAGTCAAATAAATGACCACTTTTTGTTACAATGGTATCGTAAAATCAAGGCTTCAAGAAGCTATTAGTTTTATGCATAGAAGGCAAATTATAGAATTTGTTTAGTAACATTGGTTGATCAAGAGAATACCAA	CAAAAAGGAAGCAAAACAACCCAGTTAACAAAATCCGGATTAAGTGCTACTTTCAGATTAAGTTGTTCGAAAATTTTGAAATGCAAAAAATGTTTAGTGTACAATTAAAGTGTACTTATCCTTAACCAAAATTACGTATGCAAAATGACTTCCATACCCTCCCATTTTCTAGTTGCCATCATACCATCTTCTCCATTTTC	TCCATGATTTCTGTCGAGTCT	56.474	21	100	100	ACTGGGTTGTTTTGCTTCCT	57.841	20	100	100	198	247	444	TCCATGATTTCTGTCGAGTCT	56.474	21	100	100	ACTGGGTTGTTTTGCTTCCTT	58.533	21	100	100	198	247	444	TCCATGATTTCTGTCGAGTCT	56.474	21	100	100	AACTGGGTTGTTTTGCTTCCT	58.533	21	100	100	199	247	445
PolynSSR_222	AAAT	5|AHLA_contig_110906:169-588|+	4|SCEM_1.clean_(paired)_contig_985:896-911|+	N/A	0.5	0.33	0.97	TTCTTTTTTTAACATATCTTCTATGACCAGAGAATTTAGTTAATGTAATAAAACCAAACAAGTTAAATGGAAACATCCAACATATCTTGCCTTCCAAGTTAGATTTTTAAAATAATTGTTATACAATAAAGAAGTTCAATTATAATATCTCAAGTTGGTTTTGGACTTGATCAAACTTTGATGCTGCCTTTATAAACTTA	AAAAGCAAATCAATAATTTGGTTGGCTTCCATCAAATGAAAGCCCAAGGCCAACGCACATCCATTCAAATCCTAAACATATCTCCAATTGTTAATTTTCCATCAAAACATGAACATGAACATGTAATTCAATATCAAATTATATATCAAGTACAGGCATCATCATGTAAACCAACTAGGCTTAATCCAAACACTAAAAAA	TCAAACTTTGATGCTGCCTT	56.133	20	100	100	TTGAATGGATGTGCGTTGGC	59.757	20	100	100	118	338	455	TCAAACTTTGATGCTGCCTT	56.133	20	100	100	AATGGATGTGCGTTGGCCTT	60.9	20	100	100	115	338	452	CAAACTTTGATGCTGCCTTT	55.338	20	100	100	TTGAATGGATGTGCGTTGGC	59.757	20	100	100	117	339	455
PolynSSR_223	AAAT	5|AHLA_contig_116004:265-684|+	4|SCEM_1.clean_(paired)_contig_69295:4421-4436|-	4|TWXB_1.clean_(paired)_contig_85887:3922-3937|-	0.47	0	0.99	TGAGAGTAAATGCCAGGCACAAATACTATTGACTTTAATAAGCCATTTGAAGAAACTACCATGACCAAGGTCTTGTTTTAAAGTTGGGCTTTCTAATGCGACTAAAAAGTTTAACCTTGTCAAACACGCAGAGAACCATGATCTTCCTTCAATAAGCCCCTGGCCTACGTAACTAATGTGTCCCATTCTAGTATTCTAGA	GCCCAATATCAGACTGCTACACTCTCCAAGATCGTTGATTGTTTTACTAATGTTAAATACAGAATGAAGCATTACCTTTTAAAACCAAGAAAAACAAACCTTAAGAATCTTCCATATCATGGACAGAAAAAGAAAAGGTTAATTGGATAATTTCAGTTCAAAAAAGTAGTAGAACGAAAACCACCGCGGATGCATCATGA	GCCCCTGGCCTACGTAACTA	61.045	20	100	90	ACGATCTTGGAGAGTGTAGCAG	59.575	22	100	100	100	355	454	GCCCCTGGCCTACGTAACTA	61.045	20	100	90	ACGATCTTGGAGAGTGTAGCA	58.553	21	100	100	100	355	454	ACCTTGTCAAACACGCAGAGA	60.135	21	100	100	CGATCTTGGAGAGTGTAGCAGT	59.575	22	100	100	141	313	453
PolynSSR_224	AAAT	5|AHLA_contig_116342:246-665|+	N/A	7|TWXB_1.clean_(paired)_contig_170537:749-776|-	1	0.33	0.98	TTGCTAAAATATAGACTACTTGGTAAGTAATCCAAAATAAACTATTATCTTAATTATTTTTCTCAGTCAAATGGGACAAAAAATGAACTTTGATGTAGGATTCATCAAATTTTATTATATTGACGTGTTTAAGTTATTGACAAAAATAGTCATATTTTAAATTGCTATGTTTCTGGTGTTATGTAGAAGAACATAGATCA	AAAAATGGAAAAAATATAGGGATTGTTTTGAACTTTTCAGAAATACTTGATAAAAATGAACAATAAGTTTGTTTTGTTTGGAACAATCAGAGTTATCTAGTCTTCAAATATTTTAATTTTATAACGTTGTCATCATAAATCTTTTTTGTAACATTGTGACTATAAGAGTTTTCTTTAACCGCATTTATGACCACAGTAGT	Primers not available
PolynSSR_225	AAAT	5|AHLA_contig_1175:646-1065|+	5|SCEM_1.clean_(paired)_contig_14302:417-436|-	6|TWXB_1.clean_(paired)_contig_17968:1938-1961|-	0.47	0	0.97	ATTTCTTCCACTCTCGTGACTTCTTCCCTTTGATTTTTGGATGCCAACAAATATATCACCAACCCCATATGTCGGCAATTGTTCCTGATTGCCTTGTCATTTAACTAAACTCTAAATTCAAATTAGACACAAAAAAAAGCAAATATTTAAAACTCACACCCATGGTGACAGAAACCATGAAGGTATAGGGTATCCAACAA	ACCACTCTTACAATATTCCGGTGCTTCCTCACCTGGCAGAGAAGATGAAGAAATAGCCGAATCCTTGCTCCGCAGCTACAGAGGTTAAAGGAAAAAAATGATAGCGGTTGCGACATGAAGATGGGAGAAGAAGCCCTAGGAGAAAAAAAAAGATGGGAGCAAAAGATGCTTAAAAACTCTTTCTAGAAGAGGGTGAGGAT	TGGTGACAGAAACCATGAAGGT	59.825	22	100	100	CGGAGCAAGGATTCGGCTAT	59.966	20	100	100	130	362	491	TGGTGACAGAAACCATGAAGGT	59.825	22	100	100	TCTTCTCTGCCAGGTGAGGA	59.885	20	100	95	103	362	464	TGTCGGCAATTGTTCCTGAT	57.801	20	100	90	TCTTCTCTGCCAGGTGAGGA	59.885	20	100	95	196	269	464
PolynSSR_226	AAAT	5|AHLA_contig_132996:1847-2266|+	N/A	4|TWXB_1.clean_(paired)_contig_42858:2067-2082|+	0.5	0.33	1	AATATACTATGTACATCAACAAACTGGATGCCTGAATTTTGCAAACTCTTAGTCACATTGTGAACAGCTGCGCCACTTATAAGAATGTGCCTAGCAAACAGTATACTTTCCCTAGAACTCCAACGAAAAGGAAATGTCCCTTAAAATTACTTATTACTTGAATTAGTAAGCTAGAGATATCAAAGGAGCGGCAAAGTTAG	ATTTGCATAAACCACATCAAACAGTGTGCTCGTGAACCATCAAGTCTTTGTGATGATATCGATCTAGGAAAACTGCAAATTTAGCTATGAATCAAAGAAATTCGAAATCTCAAAATAGTAGTCCTACAGGTTTAAGACTCTTAAGAGTTTTCTTGATGCAGCATAAGCTACCTGGTTTTGTCTTACAAAGTAACAGAGAA	TGAACAGCTGCGCCACTTAT	60.322	20	N/A	N/A	ATGGTTCACGAGCACACTGT	59.893	20	100	100	200	260	459	TGAACAGCTGCGCCACTTAT	60.322	20	N/A	N/A	TGGTTCACGAGCACACTGTT	60.108	20	100	100	199	260	458	TGAACAGCTGCGCCACTTATA	60.067	21	N/A	N/A	ATGGTTCACGAGCACACTGT	59.893	20	100	100	200	260	459
PolynSSR_227	AAAT	5|AHLA_contig_147725:443-862|+	8|SCEM_1.clean_(paired)_contig_89355:1334-1365|-	N/A	1.5	0.33	0.99	GAGTATAATTTAGTGATCTATAGTAATATTTACACAATAGTTGCCATATGATCTTTTAGCATTGGATCCTTTACATAGAATGTTTATTTTGAGGAGGACATAAGATTAAATCACAAAAACGACACAAATTAAGGCGAAGATGATTTGTTTATCATACGCCATATTTGCACAAGTGGGAGGTGCTTGCCCCCTTGATAAGG	AATGATAAGAAATCTTTAAGACAAATGTGATTTTATTTAATGCACGAAGAAGATAATTAGGGGCGGAGCAATTATGAACTTTAACTCTCATTTAATTCAATTCGGCTGTGACGTGGATTGGGGGGCTAAAGCCGGTTAGATGAAAACGGGGTTTGAGCCAATTCATAAACGGAACGAAACGGGGACATACGGTATAGCGT	ACGCCATATTTGCACAAGTGG	59.798	21	100	85.71	ATCCACGTCACAGCCGAATT	60.036	20	100	100	183	355	537	ACGCCATATTTGCACAAGTGG	59.798	21	100	85.71	AATCCACGTCACAGCCGAAT	60.036	20	100	100	184	355	538	ATTTGCACAAGTGGGAGGTG	58.669	20	100	100	ATCCACGTCACAGCCGAATT	60.036	20	100	100	176	362	537
PolynSSR_228	AAAT	5|AHLA_contig_153295:11-430|+	3|SCEM_1.clean_(paired)_contig_139542:784-795|-	5|TWXB_1.clean_(paired)_contig_120852:1099-1118|+	0.94	0	0.84	CGATGTTCCTCAAGATCGCTCAGTACCGCGCCGGCATCGTCCCTGTCTCTTACCGCCGGTACAGTCCTTCACCCTCCTCTCTTTTCCTCGGTGATTACTTTCTTATTTTCACCCTTAGTTATTTTCTATAAATTTTTATTAGGTGGTGATTTATTCATAATTTAAAATTATATTTATTTTTCAATTAACAATAAATAATA	AGGTTTGAAATCTTGAACTGATTCAAAACACCCGCCCCCGCCATCTAATTCCATTCTGTTTACCCACTATACAATTTCGGTCGGGTGACAAAACTACCCTCATTCTCTAATCCTAAAAAATCAAGGGTATTTTCGCCATTACAAACCTCACACTCCTCCGAGTCCCGAGAAAAGCCGCGTGACCCTGTAGCAAGATTCAA	ACAGTCCTTCACCCTCCTCT	59.51	20	100	80	GGGCGGGTGTTTTGAATCAG	59.756	20	100	100	197	70	266	AGTCCTTCACCCTCCTCTCT	58.911	20	100	90	GGGCGGGTGTTTTGAATCAG	59.756	20	100	100	195	72	266	CAGTCCTTCACCCTCCTCTC	58.809	20	100	85	GGGCGGGTGTTTTGAATCAG	59.756	20	100	100	196	71	266
PolynSSR_229	AAAT	5|AHLA_contig_156407:148-567|+	N/A	2|TWXB_1.clean_(paired)_contig_102898:204-211|-	1.5	0.33	0.94	CACCACCGGCCGCAGGCTTGCAGACAAACCCTAAGTTTGGCTTGGAGGTAAACGGCTCGCCAGTGACGGCGGACACGTGGCGGTGCATGCAACGCGTAAGGTCACGTGAGAGGGAGGGTGTCAAAACAACAAGCTCCGTATTCCAATTCTTACCTTATTCGAACTTATTCTGTTATTCCTCTCTCTATATATATATTGAA	ATAATTTGCTATTTATAATATTCGTCAGAAATTATTATAAAAAATTCTTTAAATTTTCAAAATGTCAAACTCAATATATTCCTATTTTATTTTTGATAAATGTGTTAAATAAAAGTTAAACATAAATATTCTCCTATACTGATAAAAGATTTTTTTATTTCAATTTTTTTTATTATTATTATTGGACCAAAAAACTGTTG	Primers not available
PolynSSR_230	AAAT	5|AHLA_contig_37438:1622-2041|+	3|SCEM_1.clean_(paired)_contig_132408:2725-2736|+	4|TWXB_1.clean_(paired)_contig_147050:603-618|+	0.82	0	0.99	ATTAAGATTTTCATGCATTGTCCAGCAGCCAATCCAATGTCTCAAATGTAGCTAGTAGTCACAAGGAACCAAGAGATACAAATTATATTCCTCCTCCTAAACTAGAGTTCTATATGTGGTGTGGATATTTTTTAGCATTATATAACCCAAACATTCTAAGGTTACCTAGTAATATAGAATAAGAAGGTTTGTGTGCAAGC	AAAGCTTTCAAGTATTAGTTATCAAACTAAATTTTCATGTAGAGCATGATCTATTAAATATAGGAGAATCGTATAAGGAAAATTGCTACCTCTGGTGATATGTCAAGGAAAATTACTAGATCTGGAGCTACTAATCCCACCTCCGGAGCCTGCAGCAGAATTTCATCTTGTCTTTGGACCAATATTTATAGATAAGACAA	AGAAGGTTTGTGTGCAAGCA	58.527	20	95	100	CGGAGGTGGGATTAGTAGCTC	59.386	21	100	100	184	381	564	AGAAGGTTTGTGTGCAAGCA	58.527	20	95	100	CGGAGGTGGGATTAGTAGCT	58.294	20	100	100	184	381	564	AAGAAGGTTTGTGTGCAAGCA	59.176	21	95.25	100	CGGAGGTGGGATTAGTAGCTC	59.386	21	100	100	185	380	564
PolynSSR_231	AAAT	5|AHLA_contig_39968:2288-2707|+	N/A	4|TWXB_1.clean_(paired)_contig_72550:181-196|-	0.5	0.33	0.96	AAGAAAATACTGATAACACGTGTAACCTAATGAAAAAAATAATAATAAAATTTGTATTCATACAAATATCAAGATATGGAAATGAGAATTAATAATTCTTTAATTTGAAAAACCTAAAATACTTTCTGATTCAAATTTCAATATCTTCCTTTTCTTTTTTTTATTTTTCTTCTCACCAATAAGAGAATCATGACATGCAA	AAAAATTTCGCTAAACAAGAACTCTTCGACCACCTGCTTGCTTACCCCCACGATCCATTCAATACGAAGTTTTATCTTCGAGTAACTATTACTCATGCATACAGACCATATGTTATCATGTTACAAACCGTAGTTAATTGGGTGACATATATAGCATGTTAGTTAATTAAACTCACTAGAAGAACTGATCATATTGCAAA	Primers not available
PolynSSR_232	AAAT	5|AHLA_contig_40064:5470-5889|+	5|SCEM_1.clean_(paired)_contig_93780:5949-5968|+	4|TWXB_1.clean_(paired)_contig_43474:1257-1272|-	0.47	0	0.99	GGATTGTGCTCATCTAAATAAGAATGGCCAGAATGCATATTAACATGCAATTCATCAATTTCTAGTCTCCAAATTGTTGCCACATGTGAAAAGTTTACAGTATAGAAGCATTCATCCAAGTTGTGTGTCAACAAATTCAATAATAATTTATGTTTCCAAGGGTATCACAAATAATGGAACTGTCAACATGTACAACAACA	AATTCCCAACTATCTGGGGGCGGCTACATAAATCTTTCCCTTCCATGTTGCTCAGCCATATCACAATATAAAGTTTCTACTAAACACTCTTTAGGTCTACCTTTCTTTCCTCAATGACCTTCCACTCGGAAAGGTTCCACCTCTCTTACAAGGGAATCTACAAATCGTCTAAGGACATGCCTATACCATCTTAATCGATT	GCATTCATCCAAGTTGTGTGTCA	59.995	23	95.7	100	GCTGAGCAACATGGAAGGGA	60.323	20	100	100	169	307	475	AGCATTCATCCAAGTTGTGTGT	58.775	22	95.5	100	GCTGAGCAACATGGAAGGGA	60.323	20	100	100	170	306	475	AGCATTCATCCAAGTTGTGTGTC	59.746	23	95.7	100	GCTGAGCAACATGGAAGGGA	60.323	20	100	100	170	306	475
PolynSSR_233	AAAT	5|AHLA_contig_40204:1581-2000|+	5|SCEM_1.clean_(paired)_contig_77780:4541-4560|-	6|TWXB_1.clean_(paired)_contig_64682:1869-1892|+	0.47	0	1	CAACATCTTTCCATTTTACTTTCAATTTCATCACCCAATATTAGTCCTTGAAAAGCTATTATGGAAAATTTTGCTTTTATATGCATTGTAACTGAATGTTTTATCTTCCACTGGTTCAGCATAAAATTCTTTTGAATGCTTTGAGCTGACATGCTTTGGATCTGAGGATTTCTGCTGCCAATTTATAGATTTCATGATTG	AAAGATAGGACTTTATGGGAATTTATCTTATACACCTCATGTTATGGTGCCTTAGAAGAGCTGACCATTGAACTAACATTAAAATGTTGTCCTAATATTTCTAGTCTTTCAGATGTACCTATAGGTAAATTGCTTTCTCTAGAAGCTCAGAACATTCTTCCATGTTTGAATCAGTAGACTTGGCATGGCTTAGATCTCAG	TCTGAGGATTTCTGCTGCCA	59.013	20	100	100	GTCAGCTCTTCTAAGGCACCA	59.724	21	100	100	125	360	484	TCTGAGGATTTCTGCTGCCAA	59.648	21	100	100	GTCAGCTCTTCTAAGGCACCA	59.724	21	100	100	125	360	484	TCTGAGGATTTCTGCTGCCA	59.013	20	100	100	TCAGCTCTTCTAAGGCACCA	58.355	20	100	100	124	360	483
PolynSSR_234	AAAT	5|AHLA_contig_44541:3598-4017|+	4|SCEM_1.clean_(paired)_contig_3273:10126-10141|+	5|TWXB_1.clean_(paired)_contig_18332:4518-4537|+	0.47	0	1	AAGTAAAAATATTTCATTTGAACATGAGTAACCAATTGGCAATATATGATAGGCCTTCGCATACTAGGAAAAAAACCCAGAATCACATGGTACTGTATTAGACCTTGACTGCATAAATCATACTAATTCTTCCAAGATCATCTCCATTCACATGAATTTTAACCAGATAGAATAAGAAACACAGATGAGAATATGATTCA	TAAACCATGATAGCAGTTATTTGGAGGTCCTGCATGAACCTTCCATCTCAAAATATTTCTAATTTAGGGTGGAAAGCCAAAATTCAATGTCCAGAGGTTCTTGGATGTCTAGGTATTCAAATGGCATTATCATATATGAATACATTCATCTTCATGATAGAGGGTATCTGTGAACAGCACTAAGGAAATAATGGTGAAAT	ACCCAGAATCACATGGTACTGT	59.087	22	100	100	GGTTCATGCAGGACCTCCAA	59.962	20	100	100	186	274	459	ACCCAGAATCACATGGTACTGT	59.087	22	100	100	GGAAGGTTCATGCAGGACCT	59.67	20	100	100	190	274	463	AACCCAGAATCACATGGTACTGT	59.669	23	100	100	GGTTCATGCAGGACCTCCAA	59.962	20	100	100	187	273	459
PolynSSR_235	AAAT	5|AHLA_contig_46234:247-666|+	N/A	4|TWXB_1.clean_(paired)_contig_58048:509-524|-	0.5	0.33	0.99	TCTCCTTCTCCTTCTTCTTATTTTCTTTAAATGTTTCACTAGATATATTGGAGCAGCTTTCACTGTCATTAATGGTGGCTTCAAACTCTTCAACTCTTTCCACTGCCATAACTCTTCTAACACTGCACTTCTTGCACTGTGTTTTCCTTCTTTCTCCTTTGCAAGATGGTGTCATGATTTTAGCACACTCTTTGGAGAGA	AATAAAAGAGAGGTATTAAATGGTTGGTTGGGTGCTAAATGAGCTAGCTTGTTACCATTGATGAAAACACCATAAAAAGGTTTTTAGTCCACCTTGAGACTAGAAACAGTGGAGAATGAAGAGAAAAAGAGGGAGAATATTGAAATCAAGGAGAAGTGAAGTACAGAGATGCCAAAGGAGGTGGATAGGAAAAGGAAACC	TCTCCTTTGCAAGATGGTGTCA	59.894	22	100	100	CATTTAGCACCCAACCAACCA	59.033	21	100	100	109	352	460	TCTTCAACTCTTTCCACTGCCA	59.827	22	100	100	CATTTAGCACCCAACCAACCA	59.033	21	100	100	175	286	460	TCTCCTTTGCAAGATGGTGTCA	59.894	22	100	100	CTCATTTAGCACCCAACCAACC	59.769	22	100	100	111	352	462
PolynSSR_236	AAAT	5|AHLA_contig_46510:422-841|+	N/A	3|TWXB_1.clean_(paired)_contig_5823:1450-1461|+	1	0.33	0.96	TTTAATAAGTTAGCATTATTAATCTACGTATATAATCTATACATGTTTAATATCTCTATTTCTAGTCTCCTACCTTAACTTCTGTACAAGCATTATGCTATTGACATTATAAATGTACTGATATCATCTATATCATGGCAGGACCAGATAAAGAAATTATGAAAGGATGTTTTGATCGCAACAGCAAACAACTCAAACAA	ATTGAGTTGGTAGATCTGGAGAAACAGTTAATGGGAGGAATCGATGCCAAAATCAATTTCATTTGGAAATTAAAAAATAAAGTAATTGCTAATAAAATACAAAGTACTTTGGTCTATTGAACCAAGGGTAATCAAAAGTATACCGGGTGCTTTCTCAAGTCCCCTGTACCTAATCTCATGCTTGGTAGATTTGCATTTTT	TGATCGCAACAGCAAACAACT	59.325	21	100	52.38	TTTTGGCATCGATTCCTCCCA	59.995	21	100	100	100	372	471	AGGATGTTTTGATCGCAACAGC	60.095	22	100	90.91	TTTGGCATCGATTCCTCCCA	59.377	20	100	100	108	363	470	TTGATCGCAACAGCAAACAACT	59.901	22	100	54.55	TTTGGCATCGATTCCTCCCA	59.377	20	100	100	100	371	470
PolynSSR_237	AAAT	5|AHLA_contig_49065:757-1176|+	5|SCEM_1.clean_(paired)_contig_146000:1057-1076|-	4|TWXB_1.clean_(paired)_contig_147773:1589-1604|-	0.47	0	0.98	CCATCATAAGCTGTGTAAGGGCATTAATAGCATCACAAGACCACACTGCATGAGGACTTTGACTTGCTTGCATCGTTGTCTGGACAATTCAATCTTTCAAATTGTCTTTGTTTTATGTCCCCACAACAATCAATTAGAGGAGACAACTCGGTGCAAGATTGGTGGTAGTACTAAAAAGAGTTGTTCCATCTTTGCATAGG	AGATTTGTGATTATTCCATGTAATGACAAATGGTGTGTGCTCCATCATGATTCAATAGGCCTTTTTATCTAGGTGGTTAGATGGGACAAAATTTACTAAATGGCCAACCTTTTTCATCAATAGAAAGATCAATTCATTCTGAATAATTTCTATAATGTATTTTGTTCTCATAATGTTAATATGTTTTCCATTTTATCTTG	GGAGACAACTCGGTGCAAGA	59.966	20	100	100	TCATGATGGAGCACACACCA	59.308	20	100	100	132	338	469	GAGGAGACAACTCGGTGCAA	59.966	20	100	100	TCATGATGGAGCACACACCA	59.308	20	100	100	134	336	469	AGGAGACAACTCGGTGCAAG	59.966	20	100	100	TCATGATGGAGCACACACCA	59.308	20	100	100	133	337	469
PolynSSR_238	AAAT	5|AHLA_contig_53889:245-664|+	N/A	2|TWXB_1.clean_(paired)_contig_69015:500-507|+	1.5	0.33	0.75	TTCCATGATTCAAAAAAGTTTTGTCCCAGGGGTATTTCTTTGTGCTATCAGCATCCAACTCATACTCATATTTCATGGAACCTAATCAGACAAAGGAATGGAGTAAATAAGAAACACTTAAGCATTTCTCTTGAATGAATTCTTCGTTTCATTCCCTTTGAGGGATTTGCAAAAGGAAACTCCATTCATAAGGCACCAAA	ACTAAGAACTTTGGTATCGATGAAAAGAAAAAAATATTAATGATCATAACAACAAAATAAAGCATTACAAGACATGTTAATCCTTGTAGAATAGCAATTAGTGAAGCTTGCAAAGCTTAAAGCATACTTTTTTATGAGATGGTAAATATTGTAAGCACTTATTATCAGTCATCCTCAGAGCACAAAGATAAATTAGGTTC	GGGATTTGCAAAAGGAAACTCCA	59.929	23	100	100	TGCAAGCTTCACTAATTGCT	55.938	20	100	100	171	361	531	CCTTTGAGGGATTTGCAAAAGGA	59.675	23	100	100	TGCAAGCTTCACTAATTGCT	55.938	20	100	100	178	354	531	AGGGATTTGCAAAAGGAAACTCC	59.675	23	100	100	TGCAAGCTTCACTAATTGCT	55.938	20	100	100	172	360	531
PolynSSR_239	AAAT	5|AHLA_contig_60007:611-1030|+	4|SCEM_1.clean_(paired)_contig_95893:608-623|-	5|TWXB_1.clean_(paired)_contig_97331:1694-1713|+	0.47	0	0.99	CCAGTGATATAGAGAGCTAATTGACCCTAGGGGTTTGACACCTTGCTTGTTAACCTACTGTTTTCTAATGCATATGTTTTGTTGTCTGTTTTTGGCTATGTCCTTTCTCTTTTTTCATGTTTGTCTCCACCCCTAATGGACTCTTTTGTATATGTTTTAACTTTTTTGATTTCTAATGCATGTGGTTTATCCACTTTCTC	AAGTTATATTCCACTACCTCAAAATCACTATTCTTTAGCAAAGTAATATTAAAGTCAATCTAATTACTATAAAATTACAATTATTGAATATTGTTAACAATGGGCATAGATATGAGATTAAAACTAAGGAGATTATGTTATCTGTGTGAAAGGAAATCACTAAACAAACATACATTAGGGTTTCACTTCATACATACTAA	TGTCTCCACCCCTAATGGAC	58.42	20	100	100	AGTGATTTTGAGGTAGTGGA	53.565	20	100	100	128	321	448	GTCTCCACCCCTAATGGACT	58.119	20	100	100	AGTGATTTTGAGGTAGTGGA	53.565	20	100	100	127	322	448	TCTCCACCCCTAATGGACTC	57.824	20	100	100	AGTGATTTTGAGGTAGTGGA	53.565	20	100	100	126	323	448
PolynSSR_240	AAAT	5|AHLA_contig_62329:2410-2829|+	5|SCEM_1.clean_(paired)_contig_52545:3901-3920|-	3|TWXB_1.clean_(paired)_contig_71025:1836-1847|-	0.94	0	1	GTAACCAACTTCTATTTTGGAATGGGAATAGATTGGGGACAGGGATTACTTTCCCCAACCTCATACTCTAATCGCTAGCCCATTCCATGAACTCCCCCCAGTCATCATTGGAGATCTATAGGTAAAAATCATTCTTGAACTTGATGTGAACTGGGATCCCTATCTCCGCCTTATCCCTTCAAGTCTCCAATTAGCCTTAA	GAGGAACTAAAACTAATAATTATATAACACATTAAAACATGGGGTTATGATCTTAAATACTCAAAATTCTTGCGCTTTTGACTTGCTCCTTATCCCTTTTATTAGGAGAATCATCCTTGGCATTCATGGTTTTGTAACTGTAAAGAAGAAAACTATAAAAATCATGGAATATCAGTATGCTTTGTGTCATTATCAGGTTG	GGGATCCCTATCTCCGCCTT	60.546	20	95	100	GGAGCAAGTCAAAAGCGCAA	59.969	20	100	100	157	352	508	CCCTATCTCCGCCTTATCCC	58.804	20	95	100	GGAGCAAGTCAAAAGCGCAA	59.969	20	100	100	152	357	508	TCCCTATCTCCGCCTTATCCC	60.273	21	95.2	100	GGAGCAAGTCAAAAGCGCAA	59.969	20	100	100	153	356	508
PolynSSR_241	AAAT	5|AHLA_contig_68925:820-1239|+	N/A	3|TWXB_1.clean_(paired)_contig_108716:396-407|-	1	0.33	0.96	ATAATATAAATTGAAATTTAATATCTAAAATAATAATCGAGTGTAATTCAATTATCTACATTAATATTTATCTTCCTATGTCACTTTTAGCTGGTCACTTGTTAATATTGCTATAAGTTTTTCCTGTTGTGGCCTTCAATTATTGACATAATAATAGCATTATCACCAACGTTATATTTTTGCCATGAACTTGGTCAAAA	AAAAGGAAAGTAGACAATAAATAATTCTCCATGGAGTTGGTGTTGACCTTGCTGTCAAGTCTCCATTTTAATTTTCCACACAAAAGTCTTCAACGATAGAGACTTTGCGTCAAATCATGCTAAATCTAGCGGATTACTTTGTCAGAGGCCCTCTCTTTTACCTAGTCACGGTCAGTGTCTTTGGTCTGTATGACTGTACC	TTTCCTGTTGTGGCCTTCAA	57.848	20	100	100	TGACAGCAAGGTCAACACCA	59.746	20	100	100	158	319	476	TTTTCCTGTTGTGGCCTTCA	57.848	20	100	100	TGACAGCAAGGTCAACACCA	59.746	20	100	100	159	318	476	TCCTGTTGTGGCCTTCAATT	57.62	20	100	100	TGACAGCAAGGTCAACACCA	59.746	20	100	100	156	321	476
PolynSSR_242	AAAT	5|AHLA_contig_79389:137-556|+	4|SCEM_1.clean_(paired)_contig_103221:519-534|-	N/A	0.5	0.33	0.97	AATAAAGATCAAAAGAAGAACTCACAATTCATGTATCTCTCAAATCTTTATTCGTAAATAGATATATAAATGTAACAAGCTCAGCTCGTTAACTATGAGATATAAATTGTAGGATATATGCCCATGTGCCAAATATGTTAACAGTGAAGATCATGTGATTATGTAAATATTTTAAATAAAAAAAAGACTGAATTTCGCTA	ACGACAACAAAGAAAGCAAGAGCAGAAAAGAAATGGAGTTGTTATCTCAATAACCAACATTAATTACTTGAGTTTAGCCAGTGAGCCAAGGTTCAACTATTGCGGATTAAAGAACTAAAGATGTGTTTGATGATTCATGTCGGCCATTCTTTCAACTTGGTTTTTATGGTGCTTAAAGACGCAATAACTAAGTAAAATCA	TGCCCATGTGCCAAATATGT	58.137	20	100	100	GAACCTTGGCTCACTGGCTA	59.675	20	100	100	196	254	449	TGCCCATGTGCCAAATATGTT	58.814	21	100	100	GAACCTTGGCTCACTGGCTA	59.675	20	100	100	196	254	449	TGCCCATGTGCCAAATATGT	58.137	20	100	100	ACCTTGGCTCACTGGCTAAA	59.229	20	100	100	194	254	447
PolynSSR_243	AAAT	5|AHLA_contig_80474:261-680|+	N/A	6|TWXB_1.clean_(paired)_contig_40867:1311-1334|+	0.5	0.33	0.99	CAAGCAGGAATATTGTTCCTCAAAAAGAAAATGTCATCCAGAAAACTTCGCCGTAATGTACTCCCCAATTGCCAAGCTTGAAGTCAGACCTGGAGATTCTATGCCAAACAAGTTAACAAGTCCAGGAATGCCATGAGTTCCTTCATCCTGCATGGGCATAAAAATAAAATAAAAATAAAATACAATCAACTAAGAATCCA	AAAAAATTCCAAGAATCAAGAGTTGGAATTTTCAACTTACAATGCACAATTTAATGATATCATCATAGAATTAGGCACTTGTCATGCATTTCCATCTGAAGACATAATAATAACAATCTATACAAGTGTACTGAATTATATTCCATCATGGTCAGGCAACACACTATTTGGCACACAGCTACCTGAATAATTATATAAGG	AGTTCCTTCATCCTGCATGGG	60.064	21	100	100	GGAAATGCATGACAAGTGCCT	59.453	21	100	100	178	335	512	TCCAGGAATGCCATGAGTTCC	60.064	21	100	100	GGAAATGCATGACAAGTGCCT	59.453	21	100	100	193	320	512	AGTCCAGGAATGCCATGAGT	58.707	20	100	100	GGAAATGCATGACAAGTGCCT	59.453	21	100	100	195	318	512
PolynSSR_244	AAAT	5|AHLA_contig_82389:1623-2042|+	6|SCEM_1.clean_(paired)_contig_8572:3927-3950|-	N/A	0.5	0.33	1	AAAAGGAGCTGTACCTGCAGTACACATTGTCCAGGGACATCGTCAATGTTGAGCATACCATCAGAGGCAGCTGCCAATATCTCTGCGCATAATTTGGCCGAGGTGGCCAAAAGGTGCTCTGGAGCCATCTGTTTTAACAAGGACACATAGATGTGCATCCGTTGCGACCTTGACTTCTCATCATTGCCTCTGGAACCAAA	AAAGATATGCGCTGCACCACCATAAGATGTGTACTCAAACATGAACCAACACTACCTTATTGAGAAAACTTTAGGCCCTTTCTGTTTGCCGGTTTCATTCTGAGTTTCACTTTGACAGCCATGGGTCTGGCAATTGTTTAGAACAAATATAGCCTCCACAAAACTGTTGTAAGCAAGGAGTGGGGCCTTAACTGCCAGAT	CGCATAATTTGGCCGAGGTG	59.971	20	100	100	TTATGGTGGTGCAGCGCATA	60.107	20	95	100	160	285	444	CGCATAATTTGGCCGAGGTG	59.971	20	100	100	TATGGTGGTGCAGCGCATAT	59.892	20	95	100	159	285	443	GCATACCATCAGAGGCAGCT	59.892	20	100	100	TTATGGTGGTGCAGCGCATA	60.107	20	95	100	193	252	444
PolynSSR_245	AAAT	5|AHLA_contig_82438:974-1393|+	4|SCEM_1.clean_(paired)_contig_4107:2384-2399|-	N/A	0.5	0.33	0.99	TATGTACTCTTCTGCAGGCAGTTCAAGATCAAGTTGCCGAGGAATTCTTCGCCTTTCTTCTTGATAACAATAATGAGACCGATCAAAACCGGACTCATTCATACCTCTCCATCTCTGTTCTCTCTTCAGCTCTTTGATCTTCAGATCACTCATCAGAATCTTTTGAACTCTATACAGACGATGAAGTTCATGAACCTGCA	ATATATATAAACAAAGCTCAAAGGAAGAATGCATCAAATGTATAAAATAATAACTAAAATCAATAAACATCCATACTTGTTGTCTGAAAGTCTCTTCATGCTTCAACATGGCCATCTTCATTCGCTCCTTATCATACTGCTTCAGAAATCTCTCCATTATCTTTCTTTTCCTGTTTGACATTCAAATTATGAATCTTTTA	CGATGAAGTTCATGAACCTGCA	59.256	22	100	100	GCGAATGAAGATGGCCATGT	58.973	20	100	100	167	378	544	CGATGAAGTTCATGAACCTGCA	59.256	22	100	100	GAGCGAATGAAGATGGCCATG	59.734	21	100	100	169	378	546	CGATGAAGTTCATGAACCTGCA	59.256	22	100	100	AGCGAATGAAGATGGCCATG	58.684	20	100	100	168	378	545
PolynSSR_246	AAAT	5|AHLA_contig_866:289-708|+	4|SCEM_1.clean_(paired)_contig_86470:2582-2597|-	5|TWXB_1.clean_(paired)_contig_164699:215-234|-	0.47	0	0.99	GTAAGTGCCATATTGTGGCCTGCATATATAGATATACAAACCTGACAACTAACCTCAAAGAATTAGTATAAAATAGAGGCCTTATGTCTTAACCTTGGTCTCTACGCCTTACACTAACACGTTTGGCTTTCAATACATACTGATCAAACTTTGCTCTCTGATTTAGAAGAAAGGTTTACCAACCATTGACCCCCCCAAAA	GAAACAGAAAGAGTGAAATATGAAAGGCCGAGAGCTGACAAGATAGTTAACTGTAATCAAACAAAATCTTTGTATATCACCGGAAATGCCTCAAATCCTCAAATTATCTTGCCAGCAGTAGTGAGCCCTGTGAGCCCTGATGGTATCTTGCTGGCTTCACCGTTGGGGAACATCCTGAGCCAGTTGGAGTGGGTCTCCTG	AACCTTGGTCTCTACGCCTT	58.651	20	100	100	GTCAGCTCTCGGCCTTTCAT	60.108	20	100	100	169	290	458	AACCTTGGTCTCTACGCCTT	58.651	20	100	100	TTGTCAGCTCTCGGCCTTTC	60.321	20	100	100	171	290	460	AACCTTGGTCTCTACGCCTT	58.651	20	100	100	CTTGTCAGCTCTCGGCCTTT	60.321	20	100	100	172	290	461
PolynSSR_247	AAAT	5|AHLA_contig_93024:1445-1864|+	6|SCEM_1.clean_(paired)_contig_110222:1019-1042|-	6|TWXB_1.clean_(paired)_contig_120506:906-929|-	0.47	0	0.99	TTCCCATAATTCTACTTGTAAATGTAGAAATAAATATTTGGCATTATTATTATTATTATTATTATTATTATTATTATTTCTTAGGTAGGAATCTAAGTGGTCACATGCTCAATCTCTACCTACAAAATCAATAACTTACATCATACTTCTTATCATTTATAATTAAATAAGCAAGAAAGAGAACCTCAATTATTTAAACA	AGAGAACTATGGTGTCCTTATCATCAAAGGATGAGGAGGTGGCAAAAGAAGAGAAGAAGAGAAATCAAAGAAGAACAGGAGAGGAATCAATTTGAAACAAATGAATGAGTGGTAGGCAGTGTTGTGTGTATGTGTGTGACTTCCTTTGTTTGTAGTGCAACTTGTGTCTTTATATTAAGGACACTAGTCCTCTCCATAGC	AGTGGTCACATGCTCAATCTCT	59.429	22	100	100	TGCCACCTCCTCATCCTTTG	59.671	20	100	100	169	295	463	AGTGGTCACATGCTCAATCTCT	59.429	22	100	100	GCCACCTCCTCATCCTTTGA	59.379	20	100	100	168	295	462	GTGGTCACATGCTCAATCTCT	58.017	21	100	100	TGCCACCTCCTCATCCTTTG	59.671	20	100	100	168	296	463
PolynSSR_248	AAAT	6|AHLA_contig_106449:598-1021|+	7|SCEM_1.clean_(paired)_contig_34456:1398-1425|-	N/A	0.5	0.33	0.99	AGCAATGCGGTCGCAGTGAGGGAAAAAGGCAATCCAAGTACCTAGACATTGTGAATATCACCACTGTGGTGTTGACAGTCTCCACCATTCACCATTTGGGATATATTGTCGAACGAAATGAAATCAATGTAAATGATTTTAGTGGTTCATATAGTTATATAGTGCAAATGGAAAGGGAGCTTCAGCTGAGCACACCATTG	AAAACTTCAAATGCTTCGAAAAGGACCGAAACCACACCCAGTTATAACAAAGGATCTAAAAATAGTTCGGATTTAGATTCGGATTCGGATCTAGGTATTAGTTATCGGGCTCTGTCAAAACCATAATCCACATCCCGTTGCTTCATCATGGTCTTGGATTCGGGTCCCTCAATATGTTCTTGTTGGATGAGGTCACTACT	TCAGCTGAGCACACCATTGA	59.602	20	100	100	TGAAGCAACGGGATGTGGAT	59.672	20	100	100	188	381	568	TCAGCTGAGCACACCATTGA	59.602	20	100	100	ATGAAGCAACGGGATGTGGA	59.672	20	100	100	189	381	569	TCAGCTGAGCACACCATTGA	59.602	20	100	100	TGGTTTTGACAGAGCCCGAT	59.6	20	100	95	166	381	546
PolynSSR_249	AAAT	6|AHLA_contig_110158:9-432|+	3|SCEM_1.clean_(paired)_contig_114869:1569-1580|-	6|TWXB_1.clean_(paired)_contig_123662:1758-1781|+	1.41	0	0.99	TAAAAACACATAGGCATAAGAGAAGAAAGTCTGAAATCATTCCATACTGCCAACAGTACATTACCACCAAATCCTTCCTGCGAAACCAACGTCCCTTCAGCATAAATTCATCCTCCAACAAATCATTCTTCGGGCTATAATCAGCTCTGCATTTCAAAAAAGTGCAAGTTGTTATGCCTTCAAGATAATCAGGGTCAAAA	AAAGAATCAATGTAGAATACTACAGTGCTGAAATCAACAGGTAACAACCAAATGAAATTTTCTGGCTAGTATGAATAAAGATAGAGGTATCAAGAATCAGTATTTGAGTATTATTTCCACACTGCATACTATGCCCATGGTTAACCAGTACAAGCTGTTCTACAAATGCAGGCCAAAATGTAACAATTTACCCTGACCAC	AAACCAACGTCCCTTCAGCA	60.107	20	100	100	ACCTGTTGATTTCAGCACTGT	58.064	21	100	100	184	90	273	AACCAACGTCCCTTCAGCAT	59.89	20	100	100	ACCTGTTGATTTCAGCACTGT	58.064	21	100	100	183	91	273	CTTCCTGCGAAACCAACGTC	59.765	20	100	100	ACCTGTTGATTTCAGCACTGT	58.064	21	100	100	193	81	273
PolynSSR_250	AAAT	6|AHLA_contig_11487:1078-1501|+	N/A	5|TWXB_1.clean_(paired)_contig_102726:365-384|-	0.5	0.33	0.99	GAATAAAAAACACAAAAGTGAAAGGTGCAATTAATAGAAACAAGCACCAATCCCCCGATGCAGAGAAATTGTTATTTCAATGAGGCTTCCAAACCCAATTCAACCAGTGACAGAGATTACTAGAAGCAAAGGAAAAAAGAGAATCAAAATTCAAATCAAGGCCACAGAATAAACTAGCAAGAGATAGAAATTCATTTCAA	CATCCTTTGTAACACATACATGTCTCACAATGACACTAATAATCTGTGGCAATTATATGCGCACCAGATAAGTAAGTTATGATGGCTACCTTATTCAACGAAAACAGGCCTGACTGTCAGGAACTAACTATCTCGGCAAAATAGAAAGGGCATGGTTCTACCGCTACATTTACGTTTTAAGTGTTATCTACATTTTCAAA	ACCCAATTCAACCAGTGACAGA	59.825	22	100	100	GGTGCGCATATAATTGCCACA	59.664	21	100	100	197	292	488	ACCCAATTCAACCAGTGACAGA	59.825	22	100	100	CTGGTGCGCATATAATTGCCA	59.392	21	100	100	199	292	490	ACCCAATTCAACCAGTGACAGA	59.825	22	100	100	TGGTGCGCATATAATTGCCA	58.315	20	100	100	198	292	489
PolynSSR_251	AAAT	6|AHLA_contig_131788:338-761|+	4|SCEM_1.clean_(paired)_contig_16828:331-346|+	4|TWXB_1.clean_(paired)_contig_151550:456-471|+	0.94	0	0.99	CGGTAAGCATCACATACATATCGAGAAAGGAACATGTGTGTAGACTACTTAGCTAAATGGCCTTTGGCGGACCCTTTAAAGTCACAAAGCTAGTGAATCCTCCTTGCATTCTCCACCAGTATATATATGGGCGGATCTTATAAGTGTGGCATGGCCTCGGATCATTGTTAGTTATAGTGGTTGACGGCTCTAATGTACCA	TCCACATCTAAAAATTTATTATTGAATTAAGGAACATGATTTTTTTTTATCATAGTTAATCTTTTAATTATTCACTATTTTAAAATATGCGCATCAAAATAATCAAGATTTACTAATACATACAAAAAGTAGGTGAAGTAATAAAAATAAAACTTATGATAATTATGAAAAAAATCCTATAGAACGTATTTAATCAAATA	Primers not available
PolynSSR_252	AAAT	6|AHLA_contig_14016:2471-2894|+	7|SCEM_1.clean_(paired)_contig_17509:8419-8446|-	5|TWXB_1.clean_(paired)_contig_29698:1766-1785|+	0.82	0	1	AGTTTATTAAATGATTCAGACCTTGTTTTCCTTTCTTTCTTCCCCATTAGTTGTTTGCCTATGTTGTACCTTCCTTCTTGCTCCGTTGCCGATTTAACTGTTTTTGGGATGCTGGCTTTATTTCTTTTTAATTTTCTCAGTGCATACTCTAAGTGAAGATAGTTAATAGTACCTTTATGCTGCTTGCTTTTCCTTGATAA	ACCTAAATAATCAAGGAGAAAATTCTTCATTCTGTTGACAATGAGGCCTTCGGTCACTAATTTAACTTTATCTTGTAGGTTCACTGGCATGAGACACTTAGAGGGCGTGTTGCCGGAATATTGACAACTCTCCGGGTATTTATTGCTTCAGCAGATCTAGACATACTGTCTAGCAGTTCAACTAAATTTGATAAGGGACT	TGCTCCGTTGCCGATTTAAC	59.2	20	97.5	100	CCGAAGGCCTCATTGTCAAC	59.195	20	100	100	199	278	476	GCTCCGTTGCCGATTTAACT	58.916	20	97.5	100	CCGAAGGCCTCATTGTCAAC	59.195	20	100	100	198	279	476	TTGCTCCGTTGCCGATTTAAC	59.802	21	97.6	100	CCGAAGGCCTCATTGTCAAC	59.195	20	100	100	200	277	476
PolynSSR_253	AAAT	6|AHLA_contig_17784:1789-2212|+	N/A	5|TWXB_1.clean_(paired)_contig_131268:468-487|-	0.5	0.33	0.99	TATAATTATGAAACAGATACTTTAGTCCGGATTAAATATATAGTTGACTCAAGTCACAAACTACATTTCTTAACCATGGCAAGGAAGGGAAAATAATTTCTACAAACATTTTATCACTAAAATTCAGTTAACCTTTTACTTTGAACTGCAAAGTCCAAGTTTGAGAAACTTTATGAATGACATAAAGAAGACAAGTGTAA	AGAAGGTATAAAATTTCCCAATGCTTAAGCTTCAGAAACACACCTGAAGTAATACTCTACTTGGCGTACAATAGAAGCTCTTTTATCCATTTTTTCTTGACCTTCAAAAGAATTGTGCTGATGTGAAGAAGAAGATGCATAAAAAGGTGGAGTCCAAACACCAACAGAAGCAGCAGGTGAATACGGAACAGCTGGTGAAT	ACCATGGCAAGGAAGGGAAA	59.513	20	100	100	TCAGGTGTGTTTCTGAAGCT	56.991	20	100	100	199	272	470	AACCATGGCAAGGAAGGGAA	59.513	20	100	100	TCAGGTGTGTTTCTGAAGCT	56.991	20	100	100	200	271	470	ACCATGGCAAGGAAGGGAAA	59.513	20	100	100	TCAGGTGTGTTTCTGAAGCTT	57.718	21	100	100	199	272	470
PolynSSR_254	AAAT	6|AHLA_contig_27842:1194-1617|+	3|SCEM_1.clean_(paired)_contig_29244:6368-6379|+	5|TWXB_1.clean_(paired)_contig_77237:1437-1456|+	1.25	0	0.98	TATCAGGCTACTGTATGTTAGAAAAAGAACCCCATCTTTGATACCAACAGCTTTGGAATCAAGCTTAGAGTAAGGGAGTTTATTCAAAGCATGCACTGCATCAAAGAAGGGAAAACTAATTTATCCATCTGCATATGCTATATGCAAGTCTATGTAGATCAATAAATACCTGAATTCTTGAACAAATTCAACAAACTCAA	AAAGAACTGACATGATACCGAACATTCTGTATGTAACACACTAAGTTCACAAAAGGGACTTTTACTTCTGAATCTCTTTTTTGTTTTTTCCCCAACCCTTTTGCTATTATGTATCATAATAGAGCAGGATCAACAGAACAATAGTGCACAAAGAGAGTGGAGGTACCCTTGGAAAATATAACACTATAAAAAGCTTAAGT	TGCACTGCATCAAAGAAGGGA	60.203	21	100	100	GTCCCTTTTGTGAACTTAGTGTGT	59.361	24	100	100	192	291	482	TGCACTGCATCAAAGAAGGG	58.75	20	100	100	GTCCCTTTTGTGAACTTAGTGTGT	59.361	24	100	100	192	291	482	TGCACTGCATCAAAGAAGGGA	60.203	21	100	100	TGTTCGGTATCATGTCAGTTCT	57.199	22	100	100	157	291	447
PolynSSR_255	AAAT	6|AHLA_contig_3128:1147-1570|+	6|SCEM_1.clean_(paired)_contig_137907:238-261|-	7|TWXB_1.clean_(paired)_contig_124327:1185-1212|-	0.47	0	0.98	GTATTTAGGCACACTATTTTCCTTTTAATTTATTATGATGATGAAGTTGTACAAAATAGTAAAGTGTTTTGCCAATTTGTTAAATACCCATGCCATAGTAAAGTGCCTATTAAAAGATTCTGAACTGGTATATGTCCCTCATGTGTAAATGATGAGCTAGGGTTAGTTTCAATTAGAGAGTCAACTACCTATGATGTTCA	AAAGGAATGAACGAATGCTTCATTCAACAAGCACAACATTCAAACTATTCTTCTATTTCACCAAGTCAGAATAAAGTATATGTGACATTGGGTCATTTGCAACATTTCCACATGAAATTGGATTAATGATCTCACTACTCCTCAACTTCTTAGCCTTGTCATACCCAAAGATCCAAATTAGTATATATTGCATAATGTGA	CCCATGCCATAGTAAAGTGCCT	60.423	22	100	50	TGTTGTGCTTGTTGAATGAAGC	58.553	22	97.75	100	176	286	461	ACCCATGCCATAGTAAAGTGC	58.345	21	100	52.38	TGTTGTGCTTGTTGAATGAAGC	58.553	22	97.75	100	177	285	461	CCATGCCATAGTAAAGTGCCT	58.064	21	100	52.38	TGTTGTGCTTGTTGAATGAAGC	58.553	22	97.75	100	175	287	461
PolynSSR_256	AAAT	6|AHLA_contig_79037:690-1113|+	7|SCEM_1.clean_(paired)_contig_61161:2202-2229|-	5|TWXB_1.clean_(paired)_contig_136091:762-781|+	0.82	0	0.99	TTTCAACTGCCTCAATCTTCTTCTATGTCCTTTGTTTTATTTCTAAAGGCCAAAATAAGGGTATGGTTCAATATATAATTTTTTTTTTTTAGAGTGGTTTAGTTAGAATATCAAGTGCGTGTTTATGAACATGGTGATGTAGGCACACGAACCAAATCCCTTTCTATTTGTCGGCAAAACTCATCCATATAGAAACGTTA	AATTAATTAATAAGATCAAGTTAGTCATCTTGCAAGCTATTAGCCAGCAAGGGAACAGTATTAATAAAGTAGAAGCTGGAGTCAATACTAATACAATAACGCAATGAATGTGTTCAGTTCTACTTACCATGTCAAACCGGTGTGCTCTGACCATGCAACTTGGTTAAGGACCGTTTCAATGAACCTACAATTATGTGAGA	TGATGTAGGCACACGAACCA	59.318	20	100	100	ACTGTTCCCTTGCTGGCTAA	59.229	20	100	100	149	334	482	TGGTGATGTAGGCACACGAA	59.318	20	100	100	ACTGTTCCCTTGCTGGCTAA	59.229	20	100	100	152	331	482	GGCACACGAACCAAATCCCT	60.894	20	100	100	ACTGTTCCCTTGCTGGCTAA	59.229	20	100	100	142	341	482
PolynSSR_257	AAAT	6|AHLA_contig_79788:169-592|+	N/A	5|TWXB_1.clean_(paired)_contig_144213:221-240|+	0.5	0.33	0.99	TAAGCACTTCTAGGCTTTTCAAAAGTCAATCCAAACAATCCTTTAATCTAGTAATATAGTATGTGTCGGTGGTGCTAAAAATCCTGATTGTGAGTGTAGACTTGCGATCCTCAAGTCAGTTGGGTAAAAATGCATAAGCGGGTTGTTACTAACTATTGTGCACACTTTCTTTATCTACATGTGCTTGTCACATATCTTTA	CAAAAAGCTAGATTTGAATTAAACTTGACTTATGATACAAGAGGGTTCAAAATATAAATAGGTTGAGTTATATGATTTGGTGTGTTACTTCTTTCACAGGTGAAAAATGTGATAATTTTAGATCAAGGTTTTATTGTTAAAATTGTTAGTTATTGTTTGAATTGGTATGAGAAATGTTTTTGTTTTAAATAAATTGAATA	TGCATAAGCGGGTTGTTACT	57.517	20	95	100	CACCTGTGAAAGAAGTAACACACC	59.965	24	100	100	196	298	493	TGCATAAGCGGGTTGTTACT	57.517	20	95	100	CCTGTGAAAGAAGTAACACACCA	58.804	23	100	100	194	298	491	TGCATAAGCGGGTTGTTACT	57.517	20	95	100	ACCTGTGAAAGAAGTAACACACC	58.803	23	100	100	195	298	492
PolynSSR_258	AAAT	7|AHLA_contig_38649:52-479|+	N/A	3|TWXB_1.clean_(paired)_contig_94786:444-455|-	2	0.33	0.97	TCATTGAACATTAACACTTAAATCATTATTTTATATTTTTTTAAAAAAAAAGTTAACGATGGTTTTAAATTCATTGGATATATTTTTATTTTACATGATTAGCATGCTCTTTATAATAATTAATGCATAAAAACTTTTACTGTCATGATAATAAAAAATTCATCAATGTCTTTAGACACAAATCGTTTGATATTTTACAA	CCATCTTTAGTTCTACTTTCTTTTTTTACTAAATGAAACAAACACATCACTCTTTTCTGGATTGAAATATATGGAAAGTATTCACTTAGAGGGGAATGTTTTACTAACTCTCAATTGTAAAGATGTGGTTGCTTACAGTTGCATTTGGGGATGTTGAACTTTTGGAAATTCAGCTCCACCTAAAATTGATGGCAGAATAT	Primers not available
PolynSSR_259	AAAT	7|AHLA_contig_58160:1036-1463|+	4|SCEM_1.clean_(paired)_contig_4432:1844-1859|-	4|TWXB_1.clean_(paired)_contig_21809:4189-4204|-	1.41	0	1	ATCTGAACATATAGAGATTTAACAAATAAAAATACATCACATAAAGCTCAGCAATATTTCAGGCAATATAAAAGACAACCTTGCTAGCCAATAAGAAAGGAGGCCACTGCATGAGGCCCAATTCTCTGTCTGCCCAATATGGGACAAGCAATAAGTCCCTTTCCCTGTTTGCCAGAGACAATATAAGATCCAAACACCAA	AATTTCCAGCACACACAAATATTGGATAGCTAGAAGCAAAATGCTACCTGTCATTTATAAGATCTTCATCCCGAAAACTAGAAATTATTTTGTTCCACATTTGAGCAAACTTAGCTGCTTCTTTATCGTTGTCTTCTGAGATCTAAATTCGACATTAGAACAAACAAAAAATTAATCCATAACCAGAAAGGCCATAAAAG	AGGCCCAATTCTCTGTCTGC	60.035	20	100	100	TCCAATATTTGTGTGTGCTGGA	58.239	22	100	86.36	141	313	453	AGTCCCTTTCCCTGTTTGCC	60.179	20	100	100	GCAGCTAAGTTTGCTCAAATGTG	59.328	23	100	93.48	193	353	545	CCCTTTCCCTGTTTGCCAGA	60.179	20	100	100	GCAGCTAAGTTTGCTCAAATGTG	59.328	23	100	93.48	190	356	545
PolynSSR_260	AAAT	7|AHLA_contig_86624:1802-2229|+	6|SCEM_1.clean_(paired)_contig_53428:2177-2200|-	N/A	0.5	0.33	0.99	TGAGCATCCGATTCCTCACCTTGTTCTTTGCAATCTCCACAACCATTTTCCTGAACAAGTTTGCTGGTCCACAAGACCACCTGTGTTGTTGGTACCGGTATGCCTTGAGCGTGCTTGGTAGCTCATTTTTAACCTACCAAATTGTATGTATAAACAATTAGAAGAGGTAGTCCTCGTAGTTTGTATAGAGCAAATAAAAC	ACACAAGGGAGTACCAGTACCTTGATATCCCCAAGAAATAGAAATTTCCAGCCTTTAAGACTAGCCCGGACAGCCAAATCCATGTCTTCGACGGTGGTTCTATCCTTCCAACCTCCGGCCTCATTTAGAGCTGTGATTCGCCAGACACCAGCAGTCCCTGCACGATTCATCATCAATGGTGTTTTTATTTATTTAGCAGT	GCCTTGAGCGTGCTTGGTAG	61.639	20	95	100	TCCGGGCTAGTCTTAAAGGC	59.171	20	95	100	197	301	497	GCCTTGAGCGTGCTTGGTAG	61.639	20	95	100	CCGGGCTAGTCTTAAAGGCT	59.169	20	95	100	196	301	496	GCCTTGAGCGTGCTTGGTA	60.671	19	N/A	N/A	TCCGGGCTAGTCTTAAAGGC	59.171	20	95	100	197	301	497
PolynSSR_261	AAAT	7|AHLA_contig_99483:763-1190|+	6|SCEM_1.clean_(paired)_contig_8302:1446-1469|-	N/A	0.5	0.33	0.99	AAGCTATAAACTCAAGCTGCTCAGTGCCGGAATCCGCTAGGATGCTGGAACCCTGTCAAAAAAAAAGATAAATATAACTCTTTTTGAAGACAAAAACTAGGCAAATGGAAAGTATAATACCACCACTATAGTTGCATTTAGAAAACTAAAGTAATACCAAAGAAAATTGCAACAGGGAAAAGCTAAACTAGAAGATATCA	ACAGGTAGATTGTCAGTTGAAGAAAATATGTAGAATATATCTAGTCATGCCAATCAAAGGGAATGATAAGTACATTTTTCTGACAATTTTTATGTTATCTAAATTCCTTGTGCGATGCATGTTAAATCACCGCCATAATATAAATGTGATCACATTCTCAAGCAATCATTTATGGAAAACTGATTGTAGGTACATGCCTT	TGCAACAGGGAAAAGCTAAACT	58.704	22	100	100	AACATGCATCGCACAAGGAA	58.753	20	100	100	184	367	550	TGCAACAGGGAAAAGCTAAACT	58.704	22	100	100	ACATGCATCGCACAAGGAAT	58.533	20	100	100	183	367	549	TGCAACAGGGAAAAGCTAAACT	58.704	22	100	100	TGGCGGTGATTTAACATGCA	58.461	20	100	100	196	367	562
PolynSSR_262	AAAT	8|AHLA_contig_92688:102-533|+	7|SCEM_1.clean_(paired)_contig_15865:1361-1388|-	7|TWXB_1.clean_(paired)_contig_148452:550-577|-	0.47	0	0.99	TTCATCCCTCAATCACTAAAAGGTTCCAACAAAAGAAACAACGGTTTATTCAATTACCACCAATCAAGTTCCAGAGCTTTTCACCAAAACACCAAATTTATCAAAATCAAAGCCCTATAAACCATGCAATTTCAAGTGGGAAAAAAAGCAACAAATAAGAAACTTTTTCAGGAATATTTCTACCTTAACTTTTCCAGCCA	CAAAAGTTAAAAATGTTAGTGAGGAGTGTCTTAATCTAATTGTCGAAACGATATACAAACTATTCGAGATAGAGTCCGAGAGAGCCTCACAGTGTGCGTCTCGGGATCGATGGCGTCGCAGCGAGCGAGGAAGAAGTAGGATCCCGGGGCACGGGAAACAGCGGGCTGGATCCGGCCGACAGGCTCAGCAACAGAGCGGA	CCATGCAATTTCAAGTGGGA	56.575	20	100	100	TGAGGCTCTCTCGGACTCTA	58.795	20	100	100	200	222	421	ACCATGCAATTTCAAGTGGGA	58.393	21	100	100	AGGCTCTCTCGGACTCTATCTC	59.961	22	100	100	199	221	419	ACCATGCAATTTCAAGTGGGA	58.393	21	100	100	GAGGCTCTCTCGGACTCTATCT	59.961	22	100	100	200	221	420
PolynSSR_263	AAATA	3|AHLA_contig_10946:337-751|+	2|SCEM_1.clean_(paired)_contig_46761:568-577|+	N/A	0.5	0.33	0.96	CATGATGCTCTATCAATCCCTCTATTAAGTTTAATCCTAATCCGAAGAGTTAAACACCATACATCTTATCTCTATCCATGCACTTAATCTTCATTACACCAATTAGATATGCAATAAAGTGTTTTCATAATGAATATTGCAACCATGAAGCAATATAGGAGATTCACAAGAATACTCATAGTCAATATATAAAAACAAAG	AGTTTTGAGATTCATAACCTGAGACACCAAATGATGGGTTAGCATTTCATGTTTAGAAATAACAAGATACAAACCAAGATTGAAAACAATAAGAAAATCATAATGTAAACACCCCCACATTCCTCTCAATTGTCGCAATGGAATCCAAGAATGTAGAAGGCCAAATTGTCAATCACTCGCATCAAAAATGCAAGGATAGC	TGCAACCATGAAGCAATATAGGAG	59.177	24	N/A	N/A	CCCATCATTTGGTGTCTCAGGT	60.291	22	90.9	100	116	337	452	TGCAACCATGAAGCAATATAGGAG	59.177	24	N/A	N/A	ACCCATCATTTGGTGTCTCAGG	60.291	22	90.9	100	117	337	453	TGCAACCATGAAGCAATATAGGAG	59.177	24	N/A	N/A	CCCATCATTTGGTGTCTCAGG	58.628	21	90.5	100	116	337	452
PolynSSR_264	AAATA	3|AHLA_contig_123192:369-783|+	N/A	4|TWXB_1.clean_(paired)_contig_171952:742-761|-	0.5	0.33	0.98	TAAAAAAAAATAAGCTTCAAGTAATAAATGTTAGAACTAGATATAGACAAAATAGTCACCGTGGTCCACCGTGACGATAACCTAACGGCTAATGGACTTGACATCCATGCAGAAAATTGAGGATGTTACTCCCTCGTAATACATGGTTGAAACTTCTATAGTAAATAGTGTGCATGTCAAGGTGACTTGTCAAAATTTTT	AAAGAAATTTCAAATTTTTTTGTTTTTATATATTATTAAATGATAGTTCTTAGAAGATGTTCATTTTATACAATGTGAAAGTATAGGTGATTATTAAACTTGTTCTGCATCTACAGTGATGAGTTGATGCATTTCATTAAAAAAAAGAATAAGAATAATAATAACAAACGCTTTTTAGAGCTTATGAAACCTGAGTGGCT	TAGTGTGCATGTCAAGGTGA	56.781	20	100	100	GCATCAACTCATCACTGTAGATGC	60.025	24	100	100	180	365	544	TAGTGTGCATGTCAAGGTGA	56.781	20	100	100	ACTCATCACTGTAGATGCAGAACA	59.779	24	100	100	174	365	538	TAGTGTGCATGTCAAGGTGA	56.781	20	100	100	TCAACTCATCACTGTAGATGCAGA	59.536	24	100	100	177	365	541
PolynSSR_265	AAATA	3|AHLA_contig_126334:3132-3546|+	N/A	2|TWXB_1.clean_(paired)_contig_70538:3188-3197|+	0.5	0.33	0.99	AGAATTTAAAGTAAAACACAACAAGTGCTGCTGAAAGCAAAAATCCCTTCTAACAGCACCAAACAAATGGCAGACCTATCTACGATCCTCTTCCAAAATCAAGAAAGAAAAATAAACACAAATCTAAAGTCCAGGAACTCTAAATGTTGTCCATCCACTCATTACCGCCATCCAGCAAGAACTAATAAAATTGACACCTC	GCAAACATTTAAAAAATCAAGAAAACCTACTTCTTGTACAAACAAAAACATGCAAATTCTCGAAATTGGGGAGGAATTCATCCACAAGTTCAAAGAACCCATGGTGGAACACATAAAGTTGGATGCTTTAAGCCTAAATCCCTAAAAACAGTACAAAATCACAAACAGACGTACCTGAAATCCCCCACCAAATAACAACC	CCGCCATCCAGCAAGAACTA	60.108	20	100	100	TGTGTTCCACCATGGGTTCT	59.15	20	95	100	164	364	527	CTCATTACCGCCATCCAGCA	60.179	20	100	100	TGTGTTCCACCATGGGTTCT	59.15	20	95	100	171	357	527	CCACTCATTACCGCCATCCA	59.82	20	100	100	TGTGTTCCACCATGGGTTCT	59.15	20	95	100	174	354	527
PolynSSR_266	AAATA	3|AHLA_contig_146682:213-627|+	2|SCEM_1.clean_(paired)_contig_52066:506-515|+	N/A	0.5	0.33	0.96	ACATCATCAAACAAATTGCATCAAAGATAATAAAAAGAATTCAATGTCCACTATTTTTTTTTATAATATGAAAAAAAGCAAGGTTTGTTACATACATAAGGCATGGTTAAATCCATGGACCATTCCAAAAGAAACACATCATCGTCTTATCCATTAATCTTATCATAGCACCACCAAAAGCTAAAATTAAAAATAAAAAT	CATTATAATGGCCCAAATGTTAGGCCACAAAGAGAACACATGAACAATATTGAGGCTAATAATTCACAATCCACAAAGGCTTAGGATCGCTCCTCAATGAAGGTGGGGCCCCACAATCACTCCTCTTATGCCGCATGGCACAAGCCTATTGTCCAATCACCATCAACTCTTATGCCACGTCAGCAAGAAGAAGGACCGTT	TCATAGCACCACCAAAAGCT	57.415	20	N/A	N/A	TGAGGAGCGATCCTAAGCCT	60.106	20	100	100	149	362	510	TCATAGCACCACCAAAAGCT	57.415	20	N/A	N/A	CCATGCGGCATAAGAGGAGT	59.893	20	100	100	191	362	552	TCATAGCACCACCAAAAGCT	57.415	20	N/A	N/A	CCACCTTCATTGAGGAGCGA	59.75	20	100	80	159	362	520
PolynSSR_267	AAATA	3|AHLA_contig_5950:1106-1520|+	3|SCEM_1.clean_(paired)_contig_148317:556-570|-	2|TWXB_1.clean_(paired)_contig_177019:431-440|+	0.47	0	0.96	TGAAATGCAAATTGGAGAACCCAATTAGGCCTAGAAATGCAAAATTATTGACTATTTTTTTTTACAAAATTACATAAAAAAATCTTCTCATTTTATTCCCAAAACTCACTTGGAGGCCTCCTTTCTATGTTGAGTTGTTTCTGTTTTATTTGTTGTGCAAGTCTCTTAAGTGAGTCATGTTAATTTTTTTAACAATCACG	GAGAAAATAAAATAAAAAACAACATAATTTAACAAGTTCACCTAAAAAATGGGCTACATCCTTTTTCCGCTATGGATGCGGCTTCGACTATAATAAACAATTCAAAAATACAAAAATCTTACCTCACACATTCTAGTGGGTTACACCTTTAAAGACACTTAAAAGATTTTAATAATTTTCTCACTCAACAACTACATATT	GGAGGCCTCCTTTCTATGTTGA	59.494	22	100	100	AGTCGAAGCCGCATCCATAG	59.967	20	100	100	193	311	503	GGAGGCCTCCTTTCTATGTTG	58.076	21	100	100	AGTCGAAGCCGCATCCATAG	59.967	20	100	100	193	311	503	GGAGGCCTCCTTTCTATGTTGA	59.494	22	100	100	ATAGTCGAAGCCGCATCCAT	59.318	20	100	100	195	311	505
PolynSSR_268	AAATA	3|AHLA_contig_83921:907-1321|+	2|SCEM_1.clean_(paired)_contig_142500:946-955|+	N/A	0.5	0.33	0.99	AATTGCATGTGCACCTTGTCAAATCAATTTTAAGTTTTTTAGGTTTCTAAAGCACTCTAGAATTCAAAAGATAAAACTGAGACCATTAATCACTACAAAACCTAAGGCAGTTGAGAAAGACCTAGACTCCGAGTTTGAGATGATCCAACCTTGCAGCCAAGGAACCAATCCTTAAACTCAGTTTTTCCAATTTGAAACAG	CCATGAATATCAGTTGGGTTTAACCTGTTCATGTGTCAACATGATCAAAGGCCCAACTTGACAAAATAATAGCTTCATATTAAATCCAAAATATAATTTTTAGTCTTATAGATCTGTTAGATGTATGCATGTACATGTATGTATACGTTTGTGTATGTGTATTCTGCATGTGTATTCATGTCCATTATTCCTATCTGTAG	ATGATCCAACCTTGCAGCCA	59.96	20	100	100	GGGCCTTTGATCATGTTGACAC	60.095	22	100	100	130	339	468	ATGATCCAACCTTGCAGCCA	59.96	20	100	100	TTGTCAAGTTGGGCCTTTGA	57.848	20	100	100	140	339	478	ATGATCCAACCTTGCAGCCA	59.96	20	100	100	GGGCCTTTGATCATGTTGACA	58.83	21	100	100	130	339	468
PolynSSR_269	AAATA	3|AHLA_contig_873:655-1069|+	4|SCEM_1.clean_(paired)_contig_60917:1095-1114|+	N/A	0.5	0.33	0.99	GGCTACAATTGCAACTAACTCCAGTATGAAGGGAACAATCAAGTACAAACTTCCTGCATTTATCATCATGTACAGAGAGCAAGCCAATTCAATTAAGGCAGTTTGCTTCAATACTCTTCGGGGTTGCTGCATCCACATGCATTGGAGAATTCAAAGTTGGAAGAAACATTTTTTTCTTTTTTCATATGTGAATGAAAGCC	CAATACAATAAATAAAAGAACGGTTTACTCAAGTATGTAGGTAATCTTGTAATTCGAAACTATTTCATTTTCTTTCTAAATTAGTGTCTAGAAAAGATTTGCTTGGAGGTATACTTAATTGGAAATTCTATTTGTGCAATTTAAATTTGACATCAAATTTGCGGTACTTCTCTAAGGTTCATTGGAATTATAATAAAGTA	GGGTTGCTGCATCCACATG	59.486	19	100	100	CCTACATACTTGAGTAAACCGT	55.316	22	100	100	136	320	455	GGGTTGCTGCATCCACATG	59.486	19	100	100	ACCTACATACTTGAGTAAACCG	55.316	22	100	100	137	320	456	CTCTTCGGGGTTGCTGCATC	61.372	20	100	100	CCTACATACTTGAGTAAACCGTTC	57.118	24	100	100	143	313	455
PolynSSR_270	AAATAA	3|AHLA_contig_32365:995-1412|+	2|SCEM_1.clean_(paired)_contig_77404:1812-1823|+	4|TWXB_1.clean_(paired)_contig_78419:1765-1788|+	0.82	0	0.97	TTTGAACACTCAACATGGGTCAACAAAATTCTATTTACAAGCCTAGGTATAAAACATGTTAAATAATTCTTGTAAGACATGATAATAGACATCATATAATAGTTATACCAACATAAAAAGCATGCTTAAACCAAAATTGAACATAAATAATACTATAAAAAAATCATAGATAGCAAAACCAATTTTGAACATTCTTTTGT	AATATAAATCCACTCACAGAGCTTATTAACTAATATAGGGTTGGACTCCTACTCCTTTATAGGTTTTTTATCCTTACATGAGGTCTCACCTCCTATGAAATTCTCATAATGTTTTAACCCAAAAAAGCAAAAATGATATGAAATTCTAGATCTATATGCAATCTATGAAAAGTCATAATCAATGTCAGTCGAACCAACTC	Primers not available
PolynSSR_271	AAATAA	3|AHLA_contig_55558:696-1113|+	4|SCEM_1.clean_(paired)_contig_67488:232-255|+	3|TWXB_1.clean_(paired)_contig_2182:3661-3678|-	0.47	0	0.99	ATATATGAAAACTAATGTATTTAATATTTATGAAGGAATAAGAACTGACGGTACAGTCAAGAACACAACCCATCTCATAGAGGGTTCCAGTGCACAAATAAATTTGAACAGGATATAAATCAATTTGATTTCTAAATTTTGTCCATCTTTTTCTTCATTGTTCCAATGTTTTTCTGTAAATTTCGAACCAGAGATGCACC	AATAATAACTTTCAAGGCCATTTAATGTATAACATGATGTAAAGATCATTGTTGAGAATTGCAGAGTTAATTCTGATGGTAAAAAAAATTAGAAATGTGATGGTATCAACTTGGGGAAAAAGTTGTTAAGTATTAATTGATATTAAGGCATGTGCAGGGAAATGTCCTGAAAGGATCAAATTTATACATTTACACAAAAT	TTCGAACCAGAGATGCACCA	59.315	20	100	100	TTTCCCTGCACATGCCTTAA	57.699	20	100	100	199	381	579	TTCGAACCAGAGATGCACCA	59.315	20	100	100	TTCCCTGCACATGCCTTAAT	57.47	20	100	100	198	381	578	TTCGAACCAGAGATGCACCA	59.315	20	100	100	ATTTCCCTGCACATGCCTTA	57.47	20	100	100	200	381	580
PolynSSR_272	AAATAC	3|AHLA_contig_65350:58-475|+	4|SCEM_1.clean_(paired)_contig_159748:310-333|-	3|TWXB_1.clean_(paired)_contig_104034:2459-2476|-	0.47	0	1	TATTGGCCTAGCCGCTGCAAAAAAATAAATAAAACAAAAAAATCCACTTTCCTCTTTCTTTGTTAGCTTTTCCATATCAAATGCTTCATATCATGCACAAACTACTCTTTCCTTTCCATTCATTCACAAGAATGATCTCTAAAAACAAACACATTTTTATATTTATATATGCTCTATAACTTTGTATACACACTTATACT	ATACATATTCATGTAATTAATACATCAAAGTGCATCATAGTATCCACCAAATGATATGTGAGCAGACCTTGCAATCAAAGGAGAAGCAGCTCCTCCTCTCATGGTGGACAGTGCTTGGTTCAACCTTGAAGCTTGTTGCACAACTTGCTTGATCCTCTGCAACCATTAATTCAGTCATAAACTAAAACATAATCCATAAT	GCACAAACTACTCTTTCCTTTCCA	59.421	24	100	100	GGTCTGCTCACATATCATTTGGTG	59.964	24	100	100	192	151	342	TGCACAAACTACTCTTTCCTTTCC	59.421	24	100	100	GGTCTGCTCACATATCATTTGGTG	59.964	24	100	100	193	150	342	GCACAAACTACTCTTTCCTTTCCA	59.421	24	100	100	AGGTCTGCTCACATATCATTTGGT	60.08	24	100	100	193	151	343
PolynSSR_273	AAATC	3|AHLA_contig_4006:3575-3989|+	3|SCEM_1.clean_(paired)_contig_38854:1489-1503|-	4|TWXB_1.clean_(paired)_contig_48082:1718-1737|-	0.47	0	0.99	GTTTTAAGATGTAAACTTGAATGTTATGTCAAATATGTTATGATTTGCAATTTGGCAAGAGAAAATAAATTAAATTGTATATAATACATGCTACCAAATATATAGCCAAGAACCCACAAAAAATCTCGATGAGAAGATTCTGAAACAGGGGACTCTCCCTCCGTACTCTTCAAGATACGGATTAAACCAACAAAGAGAAA	ACAAAGTCCTAAACAAGTATATTCAAGATTAAACCATCAGATAAAAAATGAGTTGAAAATGTCCAAACCTGTGTTTGTGCCAAAATGACTTAAAATTCATTCTAAGGCCTTCTTCAAATGTCAATATAAAAGACGAAAAAGGCAACACCACTTTAGCATTAACAGACAAAATTTAGCCAAATTCTCAAAATCTATAGTCA	GGACTCTCCCTCCGTACTCT	59.452	20	100	97.5	TGACATTTGAAGAAGGCCTT	55.138	20	100	95	189	349	537	GGACTCTCCCTCCGTACTCT	59.452	20	100	97.5	CACAGGTTTGGACATTTTCAACTC	58.957	24	100	100	139	349	487	GGACTCTCCCTCCGTACTCTT	60.065	21	100	97.62	TGACATTTGAAGAAGGCCTT	55.138	20	100	95	189	349	537
PolynSSR_274	AAATG	4|AHLA_contig_22671:773-1192|+	3|SCEM_1.clean_(paired)_contig_140918:1162-1176|+	N/A	0.5	0.33	0.97	AAACACCCATCTTTTCTTTGTTCCCTCCTTTTACTTCATCCCATGTGAACTATTCCCTCTATTAATTTCTCTGTACCCATTAATTCTCCATTCTTAATTCAACTTCTTCCTCTCTTCTTACCCATCTTTAATTAATTGTTCTTGATGCTTTTAATAATGTTTTTCATTAAAACTAGTTCATTTATTAAGCATATATATAT	ATCATTAATGATAGATGATAGAAGAATATTCATAAATAATTTTTCCTTCATTAAATTTCAACCTAATTAAGTACTAATTCAACTCTACAAAGCCATCAATACCTTGAGAGAGATCACAATAATTAATAACACTTGAAAATGAAAGAGAGAAAAAAAATTAACCTAATCAAATGGTTAGAGAAGGAAAACTACACAACTAC	Primers not available
PolynSSR_275	AAATT	3|AHLA_contig_68257:373-787|+	4|SCEM_1.clean_(paired)_contig_164172:247-266|-	N/A	0.5	0.33	0.98	AGAGAAAAGTGAATTACTTTGATGTCATTGGTCTCTAATTTTATTTAATTCAAAGCCAAACAGATACACTTTTGATTTCAAGAACTTAAAAGGACCAAGAATGTTTATTTTCCAAAGACACAATAATTCACTTCTTAAAACACCTAAAACTAATACTTAACCACAACCTCAAGTACCTAAAACGAATAATTAATTAAATC	AAATAAATTATGAAAATGGGGATCCCTTACTTGAAACGAAGGGTTTTAGAATCCCTATAAAGTTAAAAGGCCATTATTTAATATTTAAAACTAAAAAGATTAAAAAGAAAAAGGAGGGTTATTTAAGCAAAAATGAGAAGAGAACCCTCGTGTGCTTGGCCATTGGCATTGCCCCTAAAAGCTTGTAAAGCGAATCCATG	ACTTAACCACAACCTCAAGTACCT	59.589	24	100	100	TCGTTTCAAGTAAGGGATCCC	57.378	21	100	100	100	354	453	ACTTAACCACAACCTCAAGTACC	58.289	23	100	100	TCGTTTCAAGTAAGGGATCCC	57.378	21	100	100	100	354	453	ACTTAACCACAACCTCAAGTACCT	59.589	24	100	100	CTTCGTTTCAAGTAAGGGATCCC	59.06	23	100	100	102	354	455
PolynSSR_276	AAATT	4|AHLA_contig_156540:634-1053|+	N/A	3|TWXB_1.clean_(paired)_contig_79489:352-366|-	0.5	0.33	0.98	CAGGCACTGTGATTTAATTAAATGTAAATATCGAATTTTACTTTGTTAATTGATTATTTGATTGATTAATTTGTTAATTAGGTGGCACCTGCGGAGTTGGAAGCTGTGCTCGTTAGACATCCGGATATACTTGATGCTGCAGTGGTTCCGTAAGTTTATTAATATATTCATTACCATGGTTCTTTATTATATAGGGAAAA	TATTGAGATTAAAATTGTAATTAAGACATTAATTGTTGTTAATGGCTAGAATGGAGGATGAGGAAGCTGGGCAGATACCAGTGGCTTTTGTGGTGAAATCAGCTGGCAGTGAACTTACTAGTGAGCAAGTGATTCAATTTGTGATTAGTCAGGTAACATAGAAGATCAGATATAAACCCTTATAAAGTTGAATGAGATGT	ATGCTGCAGTGGTTCCGTAA	59.964	20	100	100	TCACCACAAAAGCCACTGGT	60.034	20	100	80	183	333	515	ATGCTGCAGTGGTTCCGTAA	59.964	20	100	100	GGTATCTGCCCAGCTTCCTC	59.892	20	100	100	166	333	498	ATGCTGCAGTGGTTCCGTAA	59.964	20	100	100	ACTGCCAGCTGATTTCACCA	59.889	20	100	95	197	333	529
PolynSSR_277	AAATT	5|AHLA_contig_44380:421-845|+	4|SCEM_1.clean_(paired)_contig_43258:4175-4194|-	3|TWXB_1.clean_(paired)_contig_36564:317-331|+	0.82	0	1	CTTCATTGCAACCATGAAACAAACAAGAACATTACGTTTCTGGGATATAAATATTTATTTATTTATTTCGTATCTTTAATCAATCGTGATGTTTCTCAAAAAAGAAAATTGCGGATCCAAATTATTAATAGTTCAATTAATTTTAAATCATTTCGAAATCCAATCAAAATTACAACTTTACCCCATAAAAAAAGGGCTAA	AAAAGGTATGATCCGGCTGCAACAATAGATCGATAAGCGGCGCACACAAAAGAGAGTGAACACGTTCACCAAACGACACCTTCTTTCTCTCTCATTCTCTCATCTAAAATAAATAAGAAGACCTACGCCTCGCCCCGGCACCATACGAAGCGCAAGCTTCTTCAGCTCCGACGTCGCTGCCGGGGAGCTCGCCACCGAGA	Primers not available
PolynSSR_278	AAC	4|AHLA_contig_105611:1023-1434|+	N/A	2|TWXB_1.clean_(paired)_contig_165490:356-361|-	1	0.33	0.94	AAGGAAGTCATTGTTGGTCCGTCGTCTCCCAAGGCTTCTGGGCAGGAGATGGTCATTGACGAGCAAGCTTCTCAGCCGGAAGTGTCAAGTAAGAGTTCAGAGAAGCCGCTGGAAGTCATAGAGGTAACTACTTTCCCCATTGATGAGGATCTCATCCCGTAGGAGTTGGATCGTTGTTATTGCCGCTCAGCCGAAGGGGT	TGTGACCGAGGCCTCGGAGGTGCTCGGAACCCAAACATGGCAAGGCGCGACAACAGTGATTCTCGCCTTGATTCCAACGTCTGGCCACTAGCTTGGTCAGTCTCGCGGCATATGGTGGAGAAATCCGTAAAGATCACGACATGTGGCGGACATGCAAACTATAGCGCTAAGGGAAAGTCGTAAGATTCCCACCCACTATA	CTCAGCCGGAAGTGTCAAGT	59.966	20	95	100	CTTGCCATGTTTGGGTTCCG	60.038	20	100	100	186	270	455	TTCAGAGAAGCCGCTGGAAG	60.037	20	100	100	CTTGCCATGTTTGGGTTCCG	60.038	20	100	100	161	295	455	GAGAAGCCGCTGGAAGTCAT	60.108	20	100	100	CTTGCCATGTTTGGGTTCCG	60.038	20	100	100	157	299	455
PolynSSR_279	AAC	4|AHLA_contig_111689:428-839|+	2|SCEM_1.clean_(paired)_contig_9238:2931-2936|-	2|TWXB_1.clean_(paired)_contig_172464:2913-2918|-	0.94	0	0.99	AGCTAGATGCATGGTGTTATCTTTAATTAGTTTTAATTAGTTTTGGCCAAACTCTGCCTTGTTCTAATACCTGCCATTTGGTGTCTTTGATTCAAATAATGTCAGTACTCAGTCTAACAGGACTTTGTCTTCAGTTTATATTTGTGAAATGACTGAATGAAAAAGATACATATAAATATCTATATATATCATGATAATTA	AAGAATTAAGAAACAAAACTATGTAAGATATAAAAACTAATGAAAGAGAAACATATCAGGATGATTATGATAGCTACAAGACAATTGCATTGCCTTCCTTTTCTTATAATTAGCCTTGAAACATGCCTGTCTAAGTCTCTTGGTTCTTTCATTCAACTCCATCTCTGGATTCTCCTCCATTAATCTCCTTTCCTCCTCCA	ACAGGACTTTGTCTTCAGTT	54.424	20	100	100	AGAAAAGGAAGGCAATGCAA	56.106	20	100	100	200	316	515	ACAGGACTTTGTCTTCAGTT	54.424	20	100	100	GAAAAGGAAGGCAATGCAAT	55.085	20	100	100	199	316	514	AACAGGACTTTGTCTTCAGT	54.424	20	100	100	GAAAAGGAAGGCAATGCAAT	55.085	20	100	100	200	315	514
PolynSSR_280	AAC	4|AHLA_contig_155791:141-552|+	N/A	2|TWXB_1.clean_(paired)_contig_78670:602-607|+	1	0.33	0.88	TAGTGAAATGAACATCTAACAAATTCTGCAAGAGTTGAAGCCAAAACACTTTATTTGATGTTTAAAAAAAATCTAAAGATAGTTGATGTTCAACTAACTAATGCTCAACTAACTAGAGGAACATTTTCAATGACAACACATACGAATCAAAAAATCTGCACTAGCACTAGCTTAATTAATCCACTCAGCATCACTGAATG	ACAAACTATGCAAAATTGTTTATTTTTTAAGAAAAAAAGCCAAGAATTCAAAACTGACCTTTCGCCTATTGAAGGACCAGTTATGGCTATTTGTCATATGCAAGTCCTCTGCGAACAACTCCAAGAACCATTTCCACATTTCCTCATTTTCTCTGCTCATAGTGGTCCATGCAATGGGGTAGATGCAGTCATTTGCATCT	TTAATCCACTCAGCATCACT	54.047	20	100	100	CTTGGAGTTGTTCGCAGAGG	58.848	20	100	100	162	315	476	TTAATCCACTCAGCATCACT	54.047	20	100	100	GGTTCTTGGAGTTGTTCGCA	58.695	20	100	100	166	315	480	TTAATCCACTCAGCATCACT	54.047	20	100	100	TGGTTCTTGGAGTTGTTCGC	58.695	20	100	100	167	315	481
PolynSSR_281	AAC	4|AHLA_contig_15904:1707-2118|+	9|SCEM_1.clean_(paired)_contig_45316:3793-3819|+	N/A	2.5	0.33	0.96	GCAAAATAGCTGCAGATCATTTGATCGGAAGGTTGTGGAGGAAGGCATTGGCCGGACAATTCTTACTCTGCCTTTGGAAGATCAGCAAACTGTTTTGCTTTCTTGGTTGGGAAGTTTCTTGAAGGTCGGCGACAACTGCCCAAACCTTCAGAGAGCCTTTGAGGTTTGGTGGCGGAGAACTTTCATTAGGCCGCACGTGG	AGCAACAACAGCAACAAGCTAATTTACTGCTGCTGGATAAAAGCTAACTCGAGATCTCAGTACAAAATGATGAAATGCAAGTCTTTGATGGTGTTGAAAGAGTTTCTGTTTATGGTTTTGTGTATAGATGTGGAAACTGAATTTACTGTTTATGTAACAGTAAGGTGTTTGGTTGTATTTTGAACTCAAGTTTGATTGAT	TTCTTGAAGGTCGGCGACAA	59.895	20	100	100	AGCTTTTATCCAGCAGCAGT	57.496	20	100	100	142	315	456	TTTCTTGAAGGTCGGCGACA	59.895	20	100	100	AGCTTTTATCCAGCAGCAGT	57.496	20	100	100	143	314	456	TGCCCAAACCTTCAGAGAGC	60.251	20	100	100	AGCTTTTATCCAGCAGCAGT	57.496	20	100	100	121	336	456
PolynSSR_282	AAC	4|AHLA_contig_166:2362-2773|+	3|SCEM_1.clean_(paired)_contig_6333:589-597|-	3|TWXB_1.clean_(paired)_contig_26448:603-611|-	0.47	0	0.98	AGGAAAATGCACATCTTGCGAACACCACAAGCAATCCAACAACTCAAACAAGCTAAATCATAATAAAGCATCAAAAGGGCAAACAAACACAAGTAATTTTAGAGCCTCGGAATGTCCACAAAATTTGATTTTTTGTGATAGTTTCTACTTTCTAAGTAGCAGCAGCCAATAAGTTTCAAAAGCAAGAATATCAAATGAAT	AAAAAACCAAAAATTGAGTTTCCAGATCGCCACAGATTGCATACTTCCTACTAACAGCCCCAACAGCAACATTTACCACATTTTAGTAAGGAGAAACCGAAACAATTATCTTTAAACCCCAAAGGATGGGCCAGAACCAGTCAAAACCCTAATTCATAAAAAACGTAAAACAGCAATAAAAGCACGAACAATTATGCAGC	GAGCCTCGGAATGTCCACAA	60.036	20	100	100	TGTTGCTGTTGGGGCTGTTA	60.106	20	100	100	182	301	482	GAGCCTCGGAATGTCCACAA	60.036	20	100	100	TTGCTGTTGGGGCTGTTAGT	59.815	20	100	100	180	301	480	GAGCCTCGGAATGTCCACAA	60.036	20	100	100	GCAATCTGTGGCGATCTGGA	60.463	20	100	100	151	301	451
PolynSSR_283	AAC	4|AHLA_contig_17137:3641-4052|+	N/A	6|TWXB_1.clean_(paired)_contig_37369:4466-4483|+	1	0.33	0.96	ATTAATTGTCATTATCTTTAGGTCTATCCCCACCACAATTAGCTTCACCAAAGCCACATCCAACTTCAAATGCAACAGTAAGATTTCTTTTTTATATTACACAATCTAGCCATTGGATTTTCACCTTTTCTTTTTTAAATTTCCTCAGCAATATTTTACTGTTAAATTTCAGTGAAAATGAGCTCCATTGCATCTTTATT	GACAACAACAATAATAATAAATCACTTTATTGTGTTGCCATCTTCAATTTCTTAAATGTGGGTTGACATTCAGATCTGTAGAAATTGGTTGTTTTATTCTCATTTGTGCATATTATTGGGTGCATCACATAAGTGGATACTTCGGATTACTAATCTGTAATTTTTGTAGAAATTGGTTGTTTTGTGCATATTTCTGGTTN	CAGTGAAAATGAGCTCCATTGCA	60.057	23	100	100	TCCACTTATGTGATGCACCCA	59.367	21	95.2	100	180	369	548	AGTGAAAATGAGCTCCATTGCA	58.841	22	100	100	TCCACTTATGTGATGCACCCA	59.367	21	95.2	100	179	370	548	TCAGTGAAAATGAGCTCCATTGC	59.808	23	100	100	TCCACTTATGTGATGCACCCA	59.367	21	95.2	100	181	368	548
PolynSSR_284	AAC	4|AHLA_contig_38830:304-715|+	N/A	3|TWXB_1.clean_(paired)_contig_16788:1638-1646|-	0.5	0.33	0.98	GTAATTATTAGTCATACTTGAGTTAAAATGCCGTTCTACGTCCAGTATGTGTGTTTGATTATGTATTGCAATGAAAAAAAAAACAGGCATTTGCAATTTTAAAAATTATGTAATCACCTGTATATGAATAGTTTCATAACTATCAACATGACCAACTCAAAGATCATCTCATCATTAATCAACTGTGTAAGCATCTTTAA	ACTTAGAGGATAAGCACTTTTAAGCAAATGTGGCTCCAGACTCATTTATACACATGTGTAAAGGATTATAAAATCAAAAAAAGATCAAACATAAGTCTTGAGACAAAATAACAATGCAAAAGAGCATGGATATATTCAAGAGAGATAAAAAGATCATACATAAGTGAAGTTGTCATCACAGCCACAACTCTGAATATACA	GACCAACTCAAAGATCATCTCA	55.828	22	100	100	AGTCTGGAGCCACATTTGCT	59.597	20	100	100	105	349	453	TGACCAACTCAAAGATCATCTC	55.828	22	100	100	AGTCTGGAGCCACATTTGCT	59.597	20	100	100	106	348	453	CAACATGACCAACTCAAAGATC	55.644	22	100	100	AGTCTGGAGCCACATTTGCT	59.597	20	100	100	111	343	453
PolynSSR_285	AAC	4|AHLA_contig_51188:4709-5120|+	3|SCEM_1.clean_(paired)_contig_29820:1882-1890|-	4|TWXB_1.clean_(paired)_contig_34056:4468-4479|+	0.47	0	0.99	AGATTTTTCCCAAAAACAGTCAACCTGCCAAATGTAATTTTGTTAAGAACATCATTGATTAAAAAAGAATTTTTAGGCTTTAGAAATTTGCTGCACTGCAAGCAAGTGTACTGCTGCCGCAGCAAAAAGACACAAACAGAGTGCATAGAAGAACTCTTTCCATGCAAATTGAAGGATTCAGGCATCAACTAAGAGGCAAG	ACAACAGAGCCAATTAAAATGCAACCATCAAAATATAATGTTCCAGTTCTTGAATAATTTAATAACACAAAAACAATATAATTGACCTGTCAAATTGAGTAAGGACAAAACAAAGTAAATCCTAAATAGCTGAAACCAATAGTTGAAACCAACTCATCTGCATTTCTCAAATAAAACAACAAAAGAAACACATTCGAACC	TGCACTGCAAGCAAGTGTAC	59.337	20	100	100	GGTTGCATTTTAATTGGCTCTG	56.807	22	100	100	147	291	437	TGCAAGCAAGTGTACTGCTG	59.053	20	100	100	GGTTGCATTTTAATTGGCTCTG	56.807	22	100	100	142	296	437	CTGCACTGCAAGCAAGTGTA	59.053	20	100	100	GGTTGCATTTTAATTGGCTCTG	56.807	22	100	100	148	290	437
PolynSSR_286	AAC	4|AHLA_contig_52575:2404-2815|+	4|SCEM_1.clean_(paired)_contig_62364:7417-7428|-	5|TWXB_1.clean_(paired)_contig_65574:196-210|-	0.47	0	0.99	CTTTAAAGGTGATGCCCTCTCTGTTGATTCTTCTCTGATATGAAGTTTGGAGGGATGGTTCTGCTAGCAGAGCTGGATTGGTTTTTAATGTTGGTAGGTTTTCATTTTTATTTATCAGAATTCATTTAGTTCATGGAGCTACAACATCAAGCTTTAGGCTCCTAACATCCTTCAGTCTTGTTTACGAGCATACAACAATA	AAGAAGCTGTTAGTCCCAATTATTTAGGGTCAGCTTCATGAATCTTTCTTTTCCACGTTCTCTATCAAGGATCAAAAAACTAGATAAACCAAGCCCATGCATATTATTTTGTAAAGTTTCCGCAGAACATGTTTTAGATCTCCTTCTTTTTCTACGGTTCTGCACCAGCAAAACTTTCATCTTTCTTATGGGGATTGTTG	GGAGGGATGGTTCTGCTAGC	59.892	20	100	100	AGCTGACCCTAAATAATTGGGACT	59.521	24	100	100	199	248	446	GGAGGGATGGTTCTGCTAGC	59.892	20	100	100	GCTGACCCTAAATAATTGGGACT	58.207	23	100	100	198	248	445	GGAGGGATGGTTCTGCTAGC	59.892	20	100	100	AGCTGACCCTAAATAATTGGGA	56.847	22	100	100	199	248	446
PolynSSR_287	AAC	4|AHLA_contig_5426:203-614|+	2|SCEM_1.clean_(paired)_contig_97829:3460-3465|-	2|TWXB_1.clean_(paired)_contig_150954:4345-4350|-	0.94	0	0.99	GGGAATCAATTGGATAAAACTATAAACCCTGATTGTTGTTTAATCATTCGACTTTTCAATTCTTGTTGAAATAAAATTCTTGTTCGGCTGTTCTCAATGTTATTATTGCATTTCTGATATTGATTTCATTCATTTGTTCCTGATGTGAGATGGAATATTGATCTTGATGTGGTATTTTCCCTACTTTATTGGCAGAATAG	TAAGAAAATCATATGATGGTATTTAGGATAACTAGAATGAGCCACCTTCAACCAAGTATGGAAAGAGCAAGAATCTTAAAAGCTTATTCTTTTTAAGTAAACTTGTGGTGCTTATGGATTGTGAGCTTTTTGACACCATAAACTACTCAACCTCTTCGAACCTTATGTTTTTCTATATTAGAAACCTTGGGGAAATATAA	TGTTCGGCTGTTCTCAATGT	57.745	20	100	100	ACTTGGTTGAAGGTGGCTCA	59.449	20	100	100	189	280	468	CTTGTTCGGCTGTTCTCAATGT	59.45	22	100	100	ACTTGGTTGAAGGTGGCTCA	59.449	20	100	100	191	278	468	TGTTCGGCTGTTCTCAATGTT	58.429	21	100	100	ACTTGGTTGAAGGTGGCTCA	59.449	20	100	100	189	280	468
PolynSSR_288	AAC	4|AHLA_contig_54876:826-1237|+	2|SCEM_1.clean_(paired)_contig_95733:1961-1966|-	4|TWXB_1.clean_(paired)_contig_99390:1287-1298|+	0.94	0	0.99	AGGCTCCTCCCTTTGAGTAATTGAAAACCACTTTTCTTGGTCAATGGAATTCTTTTGGCAAAGTTGTTCTCTCTGATATGCCAAATGGTTTCATGTTGATTAGATGTAAAAATGATGAAGTTAAACTAAAGATCATATTTGGTGGTCCTTGGACTATAAAGGGTATGACTCTTCAAATTGGCCATGGCATCCATACTTTG	CAAGCTTTCAAAAGCAATCATATGGATACAACTACATAACCTCCCAATAAAGCTTTGGGAGGGAGAGGCTTTGGAAGCTTTGACAGAACCACTGGGAAGACTCCATAAGGTCAATGAGTTCACATCCTCACTATCTAGGGCCAGGTTCACCATGGTTTGTTTAGAGATTGATCTCGCTCGTCCTCTGAAGCGAGGTTTCT	CAAATTGGCCATGGCATCCA	59.458	20	100	100	CATGGTGAACCTGGCCCTAG	60.107	20	97.5	85	193	373	565	TGGCCATGGCATCCATACTT	59.443	20	100	100	CATGGTGAACCTGGCCCTAG	60.107	20	97.5	85	188	378	565	TTGGCCATGGCATCCATACT	59.443	20	100	100	CATGGTGAACCTGGCCCTAG	60.107	20	97.5	85	189	377	565
PolynSSR_289	AAC	5|AHLA_contig_104251:260-674|+	8|SCEM_1.clean_(paired)_contig_121309:768-791|-	4|TWXB_1.clean_(paired)_contig_188175:766-777|-	1.7	0	0.98	AAGTTCGAACCATAGCAAGATCTCTACCTCTTGCATTGCCATATCGATTTTGACAAGTTCTGTAAAATTCAAGCCAGGCAATAAGAAAAGAGGTCATGAAGGTACAGGCCAGATAAACTGACACTGACTCACAAAAGAATAGATCATACAATGCCGAGCAACATGGTGGGTAGGACTATCTCCAAATCTAATATGACACA	ACAACAAAAACAAGTAATAAAAAATGATGGTATTATTAAAATGCATACTTGCTATTTTGCAGTTTCTTCAAGATTTTACTAAACCCAATGCTCATGAGTTTTTTAATGGTTAAAATATAATAAGTCGTGATTCAGTTCCTTCCACTGATATATTGCAACTTGGCTAGTCACACTGTCCCTGGTGTATATTTTCCATTATT	TGGTGGGTAGGACTATCTCCA	59.066	21	100	100	TGGAAGGAACTGAATCACGACT	59.367	22	100	100	196	363	558	TGGTGGGTAGGACTATCTCCA	59.066	21	100	100	AGTGGAAGGAACTGAATCACGA	59.367	22	100	100	198	363	560	GCAACATGGTGGGTAGGACT	59.672	20	100	100	ACTCATGAGCATTGGGTTTAGT	57.693	22	100	100	157	357	513
PolynSSR_290	AAC	5|AHLA_contig_11327:2349-2763|+	8|SCEM_1.clean_(paired)_contig_14991:1833-1856|-	7|TWXB_1.clean_(paired)_contig_67920:1454-1474|-	1.25	0	1	CAAAGAAACAAGAGATGCAATTGCTTAATTGGTCTTGAATTATTAATGCGAGACAGCCATTCAACTCTTCTGATCATTTTGACTCCCTGACTCTCTAACTTCACCCCGTCCTCACCCAAATTGTACACAAGCGCGTCCCCAGGAAGTGCATACGAAATTGGTCTGTGTCTGTGTTATTATAACTTATCATCAACAGCAAG	TACACCACCTCCTGCAGCAACAGAACAAGAAGCAGAGCATCAAGTTCCCATGGTGGCTCCAAAGACTTGGCTCTCTGAGCTGAGAGCCATAGTTAGTAATAATAATGATGTTAATAAACATGAAGAAGAAGTCCTTGGAATCCTCTCCTTTGAAGCAGCGGCCACCATGTCACAACTTGTGTCCCTTCACAAAGCCCTGT	CCCGTCCTCACCCAAATTGT	60.251	20	100	95	GAGCCACCATGGGAACTTGA	59.962	20	100	100	170	304	473	CCCCAGGAAGTGCATACGAA	59.748	20	100	100	GAGCCACCATGGGAACTTGA	59.962	20	100	100	138	336	473	GTCCCCAGGAAGTGCATACG	60.462	20	100	100	GAGCCACCATGGGAACTTGA	59.962	20	100	100	140	334	473
PolynSSR_291	AAC	5|AHLA_contig_11789:329-743|+	6|SCEM_1.clean_(paired)_contig_33399:3265-3282|-	N/A	0.5	0.33	0.99	TCAACGTGAGAACCAAGAGATTGAAACAGCCATAGCCATGTACAAGTGTCTCTCTGGAGAACAAGGCCTTGAATACATGAACATGGAGGACCTCACCAACTTGGCCATCATGGTGGATGCTAAGCTCAAGGCAGTGCATGACAGGATTGATCTCATCAGTGTTCCAATGACTAGCAATGATGGTGCTATTGTTGTNNCAG	AATCAACAACAGACGGAGTTGGTAGCCATGGAAAGCATGCAGAATCAGCAGACATGGTTCACTGATGTTATGAATCCTGTCAATGATTCTAATGTTTATTATGGAGGGGAGGAGGCTATGCAACCTTACATGAGCATCACCGACCTCAACATGCATCCACCTTACTGGGTCTGAGCAATAATAAGCTGGATTAGCAATAG	GGAGGACCTCACCAACTTGG	59.963	20	100	100	GGCTACCAACTCCGTCTGTT	59.679	20	95	100	158	284	441	GGCCATCATGGTGGATGCTA	59.889	20	100	100	GGCTACCAACTCCGTCTGTT	59.679	20	95	100	140	302	441	ACCAACTTGGCCATCATGGT	59.885	20	100	100	GGCTACCAACTCCGTCTGTT	59.679	20	95	100	148	294	441
PolynSSR_292	AAC	5|AHLA_contig_16333:1176-1590|+	5|SCEM_1.clean_(paired)_contig_31127:4680-4694|+	9|TWXB_1.clean_(paired)_contig_25704:1602-1628|+	1.89	0	1	CTATCCTCAATTTCTTTGTGATGCTTCCTGTATGCCTCACTCATTGCATCAGCCCATTTGATTTTTTCTTGAATAGTCTGCAGCAAGTTATCAGAGGTGCATGCCCTGCAAGGCATTCAATAATACATAAGAGAGAGCCCAATGGACCATCTATCAGTAAAAATTGAGTTCTAATGATAATATAGAATGTGCTTCGCTGA	CACCAAATCCCAAATTTGAGCAAATACAGATGAATTCCACTATATATGCCAAAGATAGCTTGCCACTGTGGCCTGCAATTATATTATATGAAGAGCCTCTAAAGTAAAAGCACAGAGTCAGCTGAAAAACAGAGGCCTCCCCTAAATCCAACATTCCTGCTGCCAGTGGTAACAGGTTGACATCAGCTGAAACTGCCATT	AGAGAGAGCCCAATGGACCA	60.253	20	100	100	CAGTGGCAAGCTATCTTTGGC	59.866	21	100	100	154	329	482	AGAGAGAGCCCAATGGACCA	60.253	20	100	100	GTGGCAAGCTATCTTTGGCA	58.823	20	100	100	152	329	480	AGAGAGAGCCCAATGGACCA	60.253	20	100	100	AGTGGCAAGCTATCTTTGGCA	60.272	21	100	100	153	329	481
PolynSSR_293	AAC	5|AHLA_contig_17665:3362-3776|+	6|SCEM_1.clean_(paired)_contig_122973:832-849|-	6|TWXB_1.clean_(paired)_contig_76908:1122-1139|+	0.47	0	0.99	CTCAGCCCGCATGAAACCCTATCTCCCTGGAAATCAAACACCATGAATAAAGTACCAATAGAAGCAAGACCTTTGTAAAAGAGAAGGAAGAGATGCAGTCGAACCGAGACAATGCCGCCTCCATAGGAGAGACTATATATCCATACAGCATCAGTAGCGGAAGGGCCAACCTAAGGATCAAGAACACCAGAAGTATAACT	AAGGAAAAAGAGGTGCAAGGAGAGAAGCCATGGCCATGAGGTTAAGCTAACCTTCTTCGGGACGATGAGCTTGAGAGGGTATTTGCAGAAGCATCGGATCACCGTAGACTTCCCCTCCACGAGCTCCACCGCTACGTACCCAGTCTCCGCCACCGTCTCCTCCATCTTCCGCTCCCCCAGTGCCGCCCTTGACGACCTTC	GAGACAATGCCGCCTCCATA	59.893	20	100	100	CCATGGCTTCTCTCCTTGCA	60.035	20	100	100	143	305	447	AGACAATGCCGCCTCCATAG	59.893	20	100	100	CCATGGCTTCTCTCCTTGCA	60.035	20	100	100	142	306	447	GATGCAGTCGAACCGAGACA	60.109	20	100	100	CCATGGCTTCTCTCCTTGCA	60.035	20	100	100	157	291	447
PolynSSR_294	AAC	5|AHLA_contig_19939:2207-2621|+	N/A	4|TWXB_1.clean_(paired)_contig_59922:4789-4800|+	0.5	0.33	0.98	ATTTGTCAACAAAGGAAACAACTTTTTCTTTCGTTTTATTGTTATGTTTTCTTGTCTTCAATTCAATGATGCAAATATATGTTCACGAAGATCTTTTTTATAATTCAGTGATCTTTAATTCCTCATTTTTCTTTGCAACAGCTCAAAGATTTGATCTTCAATGATGCAAAACTCAACTGCATTGGCAACTTCTCAATAAG	AGCAACAGCAACAACAGCAAATCAAGTGTCCCAGGTGTGACTCCACAAACACAAAATTCAGCTACTACAACAACTACAATCTCTCTCAGCCCCGGCATTACTGCAAGTCGTGCCGCCGATACTGGACTCTAGGCGGCGCTCTCCGCGACGTTCCTGTCGGCGGTGGCTCTCGCAAATCCTCCAAACGCTCCAAGCATTCA	GCAAAACTCAACTGCATTGGC	59.472	21	100	90.48	GCCGCCTAGAGTCCAGTATC	59.401	20	100	100	187	365	551	GCAAAACTCAACTGCATTGGC	59.472	21	100	90.48	CGCCTAGAGTCCAGTATCGG	59.124	20	100	100	185	365	549	GCAAAACTCAACTGCATTGGC	59.472	21	100	90.48	CCGCCTAGAGTCCAGTATCG	59.124	20	100	100	186	365	550
PolynSSR_295	AAC	5|AHLA_contig_27815:510-924|+	N/A	6|TWXB_1.clean_(paired)_contig_139125:1710-1727|-	0.5	0.33	0.96	ATTATTGAGAAGTCTCCGCTGTAATTCACAATCGTGGCATCCCGATAGCATATGAAGAACTTTTTGAGAAACTCCTCGATCACGAAATTTCCCTTCAAAATGAAAGACAACGGGTGTCTTCCCCCATTACTATTGTCGTTGCCGACAAGACAATTGCTTCACCTCGTAACTCTCCCAACAATCATCTCCCTTCCAACACT	CAACCATGGAAAGGCAATGACCAATCATGGCGCTCCCTAAACAACTATCAACCTCAGTGGTGGTCTCAACATCCCAACAGCCCCCTTAATGTTGTCCAATGTCAATTATGCAATAAGCTTAGCCATGTTGAGACAGTCTGTCATTCTCGGTCACATAATCACTTTGAGGCTAAAGCAAACTAGATCACAAGTTTTCAGAA	GTTGCCGACAAGACAATTGCT	60.001	21	100	100	GGGCTGTTGGGATGTTGAGA	59.962	20	100	80	161	337	497	GTTGCCGACAAGACAATTGCT	60.001	21	100	100	TTAGGGAGCGCCATGATTGG	60.179	20	100	100	118	337	454	GTTGCCGACAAGACAATTGCT	60.001	21	100	100	CGCCATGATTGGTCATTGCC	60.249	20	100	100	110	337	446
PolynSSR_296	AAC	5|AHLA_contig_35974:355-769|+	N/A	6|TWXB_1.clean_(paired)_contig_102714:1865-1882|-	0.5	0.33	0.99	TTACTAAACTACATGTAGCACTTAAATTCATCCAAAGGCATATATTAAATTTTACATACCTTCTAAAAGCTCAACCATGTTAAATAATAATGGAGAATAGATAAACTTACAGCAAATGGAGAATAGATAACAATGCCATGCATTAGAGCATCCTGCATACATACAGTAAAAAACAAAATTTTTATTAAAGTTAAAACAGA	CTAAGAACTACATATTTTGGTGAACCAAACAGTCGTACAACAGAACTACTAGTTATATATAAATCAAACAAGATTACACAACAAAATTTCGCCATATGACAGGCAGCATACATAACATAATCCAGATGATAAAAATGAATTTTTTGTATAAAGAAGTTGCGGCAGAAAAGGACAAAAAAATCTGCATATAAAACAATGTT	GCATCCTGCATACATACAGT	55.303	20	100	100	TGTACGACTGTTTGGTTCACCA	60.094	22	100	100	107	347	453	GCATCCTGCATACATACAGT	55.303	20	100	100	GTACGACTGTTTGGTTCACCA	58.447	21	100	100	106	347	452	GCATCCTGCATACATACAGT	55.303	20	100	100	TGTACGACTGTTTGGTTCACC	58.447	21	100	100	107	347	453
PolynSSR_297	AAC	5|AHLA_contig_41281:3010-3424|+	2|SCEM_1.clean_(paired)_contig_37501:4164-4169|+	N/A	1.5	0.33	0.74	AACCAGCAGTCTTAACAATTGTGTAGAACCTTTCAAATCAGGCCCGGGGAGCTTGTTTGAGACCATAAGAGCATGGTGAAGACGACAAACCTACCTCGGAGGTGGCTGAAGACCTGAAGGAGAAGTCATGTAAACCCCTCATTCAAGTCCCAATGAAGAAATTCATTCTTCATGTGAAACAGATGAAGAGCCCACCCACG	AATCAAGGTGTGCACAGTGTGCATGTGGACTGCTGCAGGAAAAGTCTCCTCATAGTCGCGACCATACTTCTGTTGAAAATCTCGAGCAACCAATCATGCTTTATAGCGCTTGAGAGATCCATCAGAACTGTTTTTCACTCGGTAGAACCAACGATAGGTAATGGGAATAGCATGGAAGGGAAGAGGAACGAGATCCCATG	GGTGGCTGAAGACCTGAAGG	60.322	20	100	80	TTTTCCTGCAGCAGTCCACA	60.107	20	100	100	158	300	457	GGTGGCTGAAGACCTGAAGG	60.322	20	100	80	TGGTCGCGACTATGAGGAGA	60.107	20	95	100	179	300	478	GGTGGCTGAAGACCTGAAGG	60.322	20	100	80	TTTCCTGCAGCAGTCCACAT	59.889	20	100	100	157	300	456
PolynSSR_298	AAC	5|AHLA_contig_51015:207-621|+	4|SCEM_1.clean_(paired)_contig_103408:2554-2565|-	N/A	0.5	0.33	0.96	TTATTAAAAAAAATTATATTCCGTTTAAAATCCCTTTCTATTAGTAACGGATTAGAAATGGATTTTTTAATAAATTTTATTTTATATATATATTTGAAAAAGTGATAAACCATATGCATAAAAAAAAAGAAACAAGCATACATATTCCACTAGCTATGGAAACAGTCAATCCCAGAGAAATTCAAAAATGAAAGACTGAG	AAGGGAAACAACAGAAAAAACCAAGAAAAGAAATTCAGCGAGGGAGTAACAAATTAAAGGCCTCAAGCCATCACCCTCACGATGCCTAAGGCCCACCAAACAAACTACTCCTCGGTCTCACTCTCGCCTAAATCAGTCTAGATACTAAGGAACATCAAATTGCGCTTTGCTGAAGCAACTTGATCTTTCATCTTGACCTT	TGGAAACAGTCAATCCCAGAGA	59.021	22	100	100	TTAGGCGAGAGTGAGACCGA	60.036	20	100	100	190	356	545	TGGAAACAGTCAATCCCAGAGA	59.021	22	100	100	ATCGTGAGGGTGATGGCTTG	60.108	20	100	100	142	356	497	TGGAAACAGTCAATCCCAGAGA	59.021	22	100	100	CATCGTGAGGGTGATGGCTT	60.108	20	100	100	143	356	498
PolynSSR_299	AAC	5|AHLA_contig_54790:4080-4494|+	N/A	6|TWXB_1.clean_(paired)_contig_110175:1027-1044|-	0.5	0.33	0.97	TTTAGCAAGATAAGAAGAAGTTTACTTGAATGAAGGTTAAGTTAAAAAGCATGTAGAGAAGAAAGAAACAAGAATGGAGAATAGAAGAAGAAAGAGGTGCAGACAAGAAAACACTGCTTCTCAAGTAGTAATTAGAGAGTTGACCTTTGGCTGTCATTTCAAATAGCAATCATAGGAAAAGGGTCTAAATAGTTAACAAA	TACAAAAATAATTAATTATAATATTAATCATAATCACAAAGAAGCAACATGCATCACTTTCTTTTTGTAGGGGAGCAACCAAACCATGCACCATTACTTCTCTATGGTTTCAAAAGAAGTAAACAAATAACAATGTCTCATTTTCTTAGTGAGCAGGTAAAGTTTGATTCCTTTTCTTTCAAGATACTGACTATTAAACC	AGAGTTGACCTTTGGCTGTCA	59.51	21	100	100	ATGGTGCATGGTTTGGTTGC	59.965	20	100	100	174	335	508	AGAGTTGACCTTTGGCTGTCA	59.51	21	100	100	GGTTTGGTTGCTCCCCTACA	59.888	20	100	100	165	335	499	AGAGTTGACCTTTGGCTGTCA	59.51	21	100	100	TGGTTTGGTTGCTCCCCTAC	59.888	20	100	100	166	335	500
PolynSSR_300	AAC	5|AHLA_contig_854:3972-4386|+	N/A	4|TWXB_1.clean_(paired)_contig_84360:1375-1386|+	0.5	0.33	0.97	GGTTATACCAAAAGATTCCAAAACTCTCACTGAAATTTTAGCAAGTTATGCTCAGATATACCCTTGCTTTTGTTCTAAAAAGGAATTGAACTCTCAGGATGGTTGTGCTGAAGAGTCCCGAGTCATATTCTAAATTAGTTCTTGCATCTTATTGTTTTTGTCACATAGTTGGTATTAATTACTTCAACTTCTTTTGTCAA	AATAATAAATAAAATGTTGTAGATATTTTCACTAACTCACTGAATTTGTATTGGTTTCAGTTTTGCTTTGTTTACTCTATAGTTTCATATTTTGTTTGTGGGCCAATGAATTGTGTTAATTGATGGTTATTGTGGTCCATTGTCCTTGTCTTTCTTTCCTTATATGACCACTTGCATTTCTCTGCTCTTGAGGCCATTTT	Primers not available
PolynSSR_301	AAC	5|AHLA_contig_9681:1004-1418|+	4|SCEM_1.clean_(paired)_contig_126719:378-389|+	6|TWXB_1.clean_(paired)_contig_61000:1613-1630|-	0.82	0	0.98	ATTCATGGTGTTGGACAACCGCAAACCGATAAGCACGACAAAAAACAGAAACGACAAGTGACAGCAAAAGCGCAATATATCAAAACAATGCGCATAAGTTGAGTCGATCCAATATATATTTTATATAAACGACAAGAAGTTATTTACAAAAGCGAAACAAACGAACTGAACATATAGAATGCCATGATGATTGAAACATG	TGCTACAACAACACTGTCATCTAAAAAAGACACTACACTATGTTTATAAAAGGAGAACATAAACATGAAATGCTTATAGAACTAGGCTATTCTCAGAGTCTTATTGCCTGCTACTGCCATTAATAAAATGACTACTCAGTTCAACCTCCTCCTTATATTTTCATGAGCATCTCCATCATCCCCATCTGAAGAGCCAGAAA	AGCGAAACAAACGAACTGAACA	59.583	22	100	100	TGGCAGTAGCAGGCAATAAGA	59.441	21	100	100	184	350	533	GCGAAACAAACGAACTGAACA	58.224	21	100	100	TGGCAGTAGCAGGCAATAAGA	59.441	21	100	100	183	351	533	AGCGAAACAAACGAACTGAACA	59.583	22	100	100	GGCAGTAGCAGGCAATAAGAC	59.057	21	100	100	183	350	532
PolynSSR_302	AACA	3|AHLA_contig_115845:977-1388|+	2|SCEM_1.clean_(paired)_contig_119978:1476-1483|+	N/A	0.5	0.33	0.7	ATAATCCCTTAAAGTCCATGATGCGAACATTCTCTATTGGACTTTTTTCACAAATCATGTGCAAACACACCTTAACAAAATACTAGATATTCTAAAACTCGGTATTTATTTATCTTATTAATCCCAATAACAAACAAGACCTTCTTTATCATATGTGTATTTAATGAGTTTAAAGTCTTGGCCGGAATCCAAAACTTATT	AATACAAACACAAACTAATTGATAAACAATACAATGTATAAGAGATATAAGCAAGGGGATGATAGATATATAAAGAGTAAAGTGTTAGGCCACATTTGATCCATAGAGATCAGTGATAAGGGAATAGTACTTGGAAGTCTCTATCCAAACTATAAACAAGATGCCAACCAGAGTCAAAACACTAACTAGAGAGCCCATTG	AGTCTTGGCCGGAATCCAAA	59.596	20	100	85	TGGATCAAATGTGGCCTAACAC	58.911	22	100	100	142	373	514	AAGTCTTGGCCGGAATCCAA	59.596	20	100	90	TGGATCAAATGTGGCCTAACAC	58.911	22	100	100	143	372	514	AAAGTCTTGGCCGGAATCCA	59.596	20	100	95	TGGATCAAATGTGGCCTAACAC	58.911	22	100	100	144	371	514
PolynSSR_303	AACA	3|AHLA_contig_132546:978-1389|+	4|SCEM_1.clean_(paired)_contig_22663:11102-11117|-	3|TWXB_1.clean_(paired)_contig_119803:4719-4730|-	0.47	0	0.99	GGAGTCTGTGAGTTACAATGACAAGAGTGCAATGGTTGAAGTCCATAGTAATTCTCTTTTGTACCATGGCATCAGTAACAGAGTCCACTGAAGCTGTAGCTTCATCAATGATAAGAATGCTGCTCTTTTTCAGAAAAGCTCTTCCGAGACAAATCAACTGCCTTTGTCCCACACTCCAATTCTCTCCATTTTCAGAAACT	AACGAGAAAAAAACTGCATCTTTAATCACAATGTAACTGAATCTCAATCAATAAATACGGAATTGAGTTTGTGTTACCTCTTGAATCGAGTTTCATTTCATTTCTGCGTATCAAGTCACCAACTTGGCATTTGTCTAACACCTGAAACATTATCAGAAATTTATTGTTATTTTTACTACTATTATTAATTTTGGAGGATT	ACTGCCTTTGTCCCACACTC	60.179	20	100	100	AGTTGGTGACTTGATACGCAGA	59.701	22	100	100	180	356	535	ACTGCCTTTGTCCCACACTC	60.179	20	100	100	GACAAATGCCAAGTTGGTGACT	59.638	22	100	100	191	356	546	ACTGCCTTTGTCCCACACTC	60.179	20	100	100	AGACAAATGCCAAGTTGGTGAC	59.638	22	100	100	192	356	547
PolynSSR_304	AACA	3|AHLA_contig_70042:2327-2738|+	2|SCEM_1.clean_(paired)_contig_2979:3982-3989|-	2|TWXB_1.clean_(paired)_contig_131314:835-842|-	0.47	0	0.98	AAGTCTCAAAAAGAATAAGTCCTAGGGTTCATCCATGCCCAAACACCTAACAAATCAGTTTCCTTTTATTTGGGAACAACAATCCAATCTATGAGAGAACAAAAACACTAAATAAAGCATTTAAAACTCCCCCAAGCTTCTTTTCTCTAGATTGGTGGCTAACTCCCAAGGAACTTCAGCAAACAACTCATAGGAATTAC	AATCTTGTAAGAAAGAATATTGTGAGGTTATTGCAATGTTTGACTACTCTTTCTATGAGAGCTCACCATTGCCTTTTGGCTAACAAGGTTGACGAAAACAACTTATGAAGTTAAAAGTTTATTGTAAGGTCAATGCAGTCTTTAATTACTCTCTCCAGGTGAGCCACAATTACCTCTTAGAACTCATATGAGTTTAAAGA	TTGGTGGCTAACTCCCAAGG	59.596	20	97.5	100	GCCAAAAGGCAATGGTGAGC	60.671	20	97.5	100	141	351	491	TTGGTGGCTAACTCCCAAGG	59.596	20	97.5	100	AAGGCAATGGTGAGCTCTCA	59.305	20	100	100	136	351	486	TGGTGGCTAACTCCCAAGGA	60.475	20	97.5	100	GCCAAAAGGCAATGGTGAGC	60.671	20	97.5	100	140	352	491
PolynSSR_305	AACA	3|AHLA_contig_85388:2035-2446|+	3|SCEM_1.clean_(paired)_contig_95194:7806-7817|+	2|TWXB_1.clean_(paired)_contig_104247:304-311|-	0.47	0	0.99	TGAATATGCCTATCATAATCCAGGAAAAAAAATTCTTTTATAGAAAAGCATTCATTTACTCAAATCATAAAACTTTCTTGCAGTTCATGCGTCAATCCGGAAAACTACCACAAAAATTTAACCCAGATCACCTGAAATCCGGACCAATCCGGGTAGCCCGGAGGTGTGGCACTAGAGTTAGTGGCTGCTGGCTGCTCCTG	TAGCCCTTTTTTTCAGCTTTGATTGAACTAAAACCATCAAAATGACCAATAATCAATACCAAATCGTCACCTGCGGTGCCGAGGTCTTGCCAGCCTTGGCCTGCGTCTCCGCATCACTGCTCCCCATGATCCAACAACTCGTCCGCCAACTACCTCTCGAATTCCCTCTTCAAGCCATAATTCATCACAATAACCCCCAA	GGAGGTGTGGCACTAGAGTT	59.023	20	95	100	ATCATGGGGAGCAGTGATGC	60.179	20	100	100	183	359	541	GGAGGTGTGGCACTAGAGTT	59.023	20	95	100	TTGGATCATGGGGAGCAGTG	59.743	20	100	100	187	359	545	GGAGGTGTGGCACTAGAGTT	59.023	20	95	100	TGTTGGATCATGGGGAGCAG	59.743	20	100	100	189	359	547
PolynSSR_306	AACAAA	4|AHLA_contig_33577:993-1416|+	3|SCEM_1.clean_(paired)_contig_147953:638-655|+	3|TWXB_1.clean_(paired)_contig_110253:301-318|+	0.47	0	0.99	TAATTATTAAAAACTAGGCAATTAAATCTATTTTGAGGGGTGTAAGTAAAAACAATCCTCTATAACAATAACATTTGTTAAACAACCACCCCAAGTAATCATATATATTAAATGACATGGAAATCAAGATTCAAGGCCAAACATAATTATAACAACAAACCTCATATAAATCATAAACACAAGCTGATTAAAAGATTAAG	AAAAGATTGGTGGCATCACAGAGCGCATTTCGATGTATATATATATCTTGGGAAAATTTCAGATAGACGATACACGGCATCGAATCTTTTCTTCCATTTGTTTTCTCAAGCACATGTTGACTTGTCTCTGATGACCGGTTTTTCGCCTGAACAGAGGGTGATTATGTATTACAGATAACAAACTTTACAAGCGATGCCGA	TGTTAAACAACCACCCCAAGT	57.897	21	100	100	GAAATGCGCTCTGTGATGCC	60.248	20	100	100	180	275	454	ACAACCACCCCAAGTAATCA	56.64	20	97.5	100	GAAATGCGCTCTGTGATGCC	60.248	20	100	100	174	281	454	TTGTTAAACAACCACCCCAAGT	58.558	22	100	100	GAAATGCGCTCTGTGATGCC	60.248	20	100	100	181	274	454
PolynSSR_307	AACAAG	4|AHLA_contig_83936:369-792|+	3|SCEM_1.clean_(paired)_contig_44515:1017-1034|-	3|TWXB_1.clean_(paired)_contig_125650:584-601|+	0.47	0	0.98	NNNNNACACACACACACTCCATATATGGTTTTCCCTTGGAACTAGATAAGGATCTCACTGGAGGATCTGAAACGGCTTTCCAAATTCCTCACCAACTTCTTCATAAACTTTGAAATTAAGCTAAGTCCCTCTTGCTGCATGCCTTGGGAAAGATGTTCATGAGTTCCATCATTTCATCTTTGAATAAATATAAGAAGAAC	GAGCTAGCTAGAGTACAGCAACAACAATAAACTTAAGAGGCACAGAGAAGCAGAGTTCTGGTAAAATTAATATACATTCATTCCTTAATTTATTATGTAATTTAATTTATTCATGTTCTTTTCACCTTCCATGTAGTTGTCCTTGGTTTAATTAACAGGAGATGATCACAATGAAGGAAAGGTGTGAACCCTGCAAAGAA	GCTAAGTCCCTCTTGCTGCA	60.036	20	100	100	CTCTGCTTCTCTGTGCCTCT	59.103	20	100	100	160	319	478	GCTAAGTCCCTCTTGCTGCA	60.036	20	100	100	GAACTCTGCTTCTCTGTGCCT	59.998	21	100	100	163	319	481	GCTAAGTCCCTCTTGCTGCA	60.036	20	100	100	AACTCTGCTTCTCTGTGCCT	58.945	20	100	100	162	319	480
PolynSSR_308	AACAC	4|AHLA_contig_143863:651-1070|+	3|SCEM_1.clean_(paired)_contig_8364:6264-6278|-	N/A	0.5	0.33	0.99	GTCCAATTTTCACCATCAATTAAACTTTTAGTACACGAGGCCTATCCATCAGCTTCAGTTAATTTCCCTTTCCCTCTTTGCCAGCAATCTATATATACATATATATTTGTCTGATGCTAAAAACTACAGATTAGAGTAGAATCTGCAGAAAAAAAAATTATCACTACATCAATTGCAATTGCTTCAGAAAAGATTGCTGA	AACAACTGAATTAAAAATGGCAGAATTTGTGATTAACCAAGCTTCTAAGATTACGACTAATGTTTTGCCAATTGAGGAAGAAGGGACCATATTTAGAAAGCATATTCTCAAATTTTTTTTTTTTAGGTAATTGATAGGCTGCAGAGGAAAAAATTGCTAGGAAAGGCAAAGAAAGGATAATAGAAATAAAAAAAATAAAA	TGCTTCAGAAAAGATTGCTG	54.494	20	100	100	TCCCTTCTTCCTCAATTGGCA	59.29	21	95.2	100	127	379	505	TGCTTCAGAAAAGATTGCTG	54.494	20	100	100	GTCCCTTCTTCCTCAATTGGC	58.905	21	100	80.95	128	379	506	TGCTTCAGAAAAGATTGCTG	54.494	20	100	100	CCCTTCTTCCTCAATTGGCA	57.779	20	95	100	126	379	504
PolynSSR_309	AACACA	4|AHLA_contig_67911:1825-2248|+	2|SCEM_1.clean_(paired)_contig_4488:2642-2653|+	N/A	1	0.33	0.99	TAGGTTTGAACAAAGCATCTTTACCGGATGGCTTGTGGTTTTGCCCAGAATGTACCGTCAATAAAACCAGCCTTTCATCTTCCAAAGTCGGAAGGGGAATGAGAGGAGCAGAGATCTTTGGTATCGATCTGTATGAGCGGGTGTTTTTAGGGACATGCAATTACTTGCTTGTGTAAGCGCGCTCTCTCTCTCACACACAC	GACACAAACACATATGATGGGAAAAAGAATTGAACCTGTCTGTTCATGAATTTCTGTGCAAAAACCAAATAGCATAACTATTCATTGATATGAGGGCACGGAAAGTTCAGGGAGCATGTGGGCATCTATTCTTCAAACTTTTTGCTTATTTAGTTGTATTTTCTTATGCAAGATCTTCTAGTAGGTTATAATGCTGCCTT	GTAAGCGCGCTCTCTCTCTC	60.317	20	95	100	CCCACATGCTCCCTGAACTT	59.961	20	100	90	174	372	545	GCGCTCTCTCTCTCACACAC	60.456	20	100	80	CCCACATGCTCCCTGAACTT	59.961	20	100	90	168	378	545	GTAAGCGCGCTCTCTCTCTC	60.317	20	95	100	CTGAACTTTCCGTGCCCTCA	60.25	20	100	100	162	372	533
PolynSSR_310	AACC	3|AHLA_contig_53426:5804-6215|+	N/A	2|TWXB_1.clean_(paired)_contig_48210:3254-3261|+	0.5	0.33	0.98	GTTTAGAGCAGGTTTAAAGCCAGTAATGGTCCTTAAAGTTGGGGCCATTGTTCATTGTGATTGTTCATATAAAAGCATGTTTATTTTGGCAACTAAATTAGATGGATTGGTTCATTTTGGCCCCTTTCACGGACATTGACTTACTAGAGAATGTGCTACATGTCTGACATCATGGCTGTTACATTGGCTGGAGTGGTTAA	TGTCCGATTCAATGCCAAAATAAATAAGATCCTTCTTAAGGGACCAAAACATATGCTAGGTGATTTTTACTGCACCGCATAAATTTTATAGCCGATATATGAGCCAGGTAATGCCAACCTTCACTTTTGTATCATTTTTTCAATCAAATTTATGTTTTGTAGTTTTTTCCCTATTCTATTTGCAATCATGGATATAACAG	TGGCTGTTACATTGGCTGGA	59.596	20	100	100	AGTGAAGGTTGGCATTACCTG	58.205	21	100	100	165	372	536	TGGCTGTTACATTGGCTGGA	59.596	20	100	100	ACCTGGCTCATATATCGGCTA	57.898	21	100	100	149	372	520	TGGCTGTTACATTGGCTGGA	59.596	20	100	100	AAGTGAAGGTTGGCATTACCTG	58.843	22	100	100	166	372	537
PolynSSR_311	AACC	5|AHLA_contig_36426:1798-2217|+	5|SCEM_1.clean_(paired)_contig_102974:1374-1393|+	3|TWXB_1.clean_(paired)_contig_104764:669-680|+	0.94	0	0.99	TCTTCCCTCGCTCATGGCCATGAACTATTGATCTGGTTCTTCATTCGGCCTATGACATCGCATTTTTCGTCCAACTCTCACACTAGGAAGCTTTTTAGTAAGTGAGTGATTGATTCCCTGTAAATTCACTGGTTTCCTTTCGGTAATGAACTACTCCTTCGCTTATCTATATTCTCCAATTAATTTTTAACCAATCAACA	AGAAACAATGCAATTAGCGTGTTTGAAATTTGAGACCTTTTGGTTTGTCATATCCAAATGAGCCTCTCTCCGTGTTTATTGAAGTTTGTGGTTTCTTTCTAGGAGTATTCAGATCGAAATGGTACTTCCACATCATCAGATTTCTTGACATTGCAACAAGGAAAACAGAAACTTAAAAGGACGATTTCTGCCATACTCAT	TTCACTGGTTTCCTTTCGGT	57.279	20	97.35	97.5	ACGGAGAGAGGCTCATTTGG	59.461	20	97.5	100	169	324	492	TTCACTGGTTTCCTTTCGGT	57.279	20	97.35	97.5	CGGAGAGAGGCTCATTTGGA	59.173	20	97.5	100	168	324	491	CGGTAATGAACTACTCCTTCGC	58.886	22	100	90.91	ACGGAGAGAGGCTCATTTGG	59.461	20	97.5	100	153	340	492
PolynSSR_312	AACCAC	3|AHLA_contig_26780:2134-2551|+	N/A	2|TWXB_1.clean_(paired)_contig_40405:4637-4648|-	0.5	0.33	1	CGTCATTGTATGTTTTCCTTTACCACCACTTAATCTATGCTATACTGAACTAGGAAAAAGTTGATCTTTGCCAAGATACAAATTTTATAGATGCATGCATTTTGGCAACTCATTTCCCTCGTTCTGCCTTCACCGAAATCCTGAGCTGAAAGTTGAAGCCCTTAAATTATTTACCTGAGACCTCTTTGTGAATTTTGATT	AACCATTGGGTACTACCCTGCTAATGAATTCTGCATGCAGTAAACTTTTAGGGTTCACATATATCAATAGATCTCTAGTTCCAAATCCCTTGTGTTGTGCTTCTATTTGCTAGTGTTCTTTACTTATCAACTAATTCATTTTTTCTTTAGTCTCTGTAACTATGACATTATCAACCTTTTAAAACCTTTCTTTCAGGGAA	TCGTTCTGCCTTCACCGAAA	59.895	20	95	100	GCACAACACAAGGGATTTGGA	59.314	21	100	100	200	318	517	TCGTTCTGCCTTCACCGAAA	59.895	20	95	100	GCACAACACAAGGGATTTGGAA	59.898	22	100	100	200	318	517	TCGTTCTGCCTTCACCGAAA	59.895	20	95	100	GCACAACACAAGGGATTTGG	57.847	20	100	100	200	318	517
PolynSSR_313	AACCCT	3|AHLA_contig_129283:1047-1464|+	4|SCEM_1.clean_(paired)_contig_20181:282-305|+	N/A	0.5	0.33	0.95	GTTCATGACTCACTTGCGCATTCGGAAAAAAATAAATAAATAATTAGTAAAAACATGTTCTTTTTCATGAATAAATAAAACAAATAAATAAAAGAAAAATAAAATGGTATAAAACGACGTCAAAACCCAACCTTGCTGAGCTCCCATCCCCCGCCATGTCTTCCTCTACTCTTCTCTACTCTTCCTTCTTCTCTTTCCCG	AACCTTAACCCTAATGCCCTTCGCTTCTCGCATTCCTCCATCTTCGTTCCTTCTCGCCTGATCTTCTCCAGGTTCCCGAAGCTTGTCGCCATTGGAGTGAAGGAGAGAGCTCCATTGAATTGCTTTGCGGCGCAGCAGCCGCACAACGAGGGAACGCCTTCAAAAGGATGGGAATCTTGGGTCCGCCATGGCGTTATCTC	AACCTTGCTGAGCTCCCATC	60.035	20	100	100	CAGGCGAGAAGGAACGAAGA	59.756	20	100	100	150	328	477	AACCTTGCTGAGCTCCCATC	60.035	20	100	100	TCAGGCGAGAAGGAACGAAG	59.756	20	100	100	151	328	478	CCCGCCATGTCTTCCTCTAC	59.895	20	100	100	CAGGCGAGAAGGAACGAAGA	59.756	20	100	100	129	349	477
PolynSSR_314	AACCCT	3|AHLA_contig_36460:3574-3991|+	3|SCEM_1.clean_(paired)_contig_81772:229-246|-	2|TWXB_1.clean_(paired)_contig_15295:1224-1235|-	0.47	0	0.99	TTATACACAAAAGTTCTCTCACACTGCATTTAACAACAATGATTAGGGTTTTAATCAATTATCAATTGTAAGTACATATTTAGGGCACTCATGTTTGATTGGGAGTAATTGATCCATCTAATCAACCAAACAAATCATCTTTTCTATTGCTCTATTTTGAAAGCCAATTTCCAATTTAGCTTAACCCAGAGCCAAAGCCA	AATTATTTCCTCTAAGAGAAGCCCTAATTAATATTTTCCAATGCAAGTACAAGTACTATAGAAAGGAGGAATCTCAAAGAGGCCACACATGTAGACCTTTCCTACCAAACCCTGTGAAGCTTTTCATGATTAAGATTCTAAGCATTGTGATTACAGCAAGCAAGCACCAAGCTTTCATTAATTAATAAATCCACAAAAGC	TAACCCAGAGCCAAAGCCAA	59.519	20	100	100	GGTCTACATGTGTGGCCTCT	59.095	20	100	100	134	381	514	TTAACCCAGAGCCAAAGCCA	59.519	20	100	100	GGTCTACATGTGTGGCCTCT	59.095	20	100	100	135	380	514	GCTTAACCCAGAGCCAAAGC	59.472	20	100	100	GGTCTACATGTGTGGCCTCT	59.095	20	100	100	137	378	514
PolynSSR_315	AACCCT	3|AHLA_contig_42218:422-839|+	2|SCEM_1.clean_(paired)_contig_33418:960-971|+	2|TWXB_1.clean_(paired)_contig_30365:681-692|+	0.47	0	0.98	AATGTGCAAAATTCAAGAAATGAAGGGTGAACAAAAAAACAAAGAGATTCACAACCTGCTTAACAGCGAGAAGCTCCCCAGAATCGAGATTCATACCCATGTACACTTGCCCAAAGGCGCCGCAACCAATGAGTTCCCCCTTTCTCCACCGGATCGGCGGGCCTTCATCATCGGACACCGGCGCCGGCAGTGTCGGGGAA	AACCCAAATCCAACCTTAGAGTTCCTCAAACAAGACCCGATCTTCTCCCCGATTCCAGCCCCATCAGTACTTGACCGGAAAACCAGAGACCTGCGCACCGATCCGAAGAGGTCGTGCATCTTCCTTCTTGGATCTTTGAGATCGTTTTCAATGTTTCTTCGGCGAATGGAGATTGGAGAACAAGAGAGGAATCGAGATGC	ACCCATGTACACTTGCCCAA	59.519	20	100	100	GGAATCGGGGAGAAGATCGG	59.681	20	100	100	180	294	473	GGCCTTCATCATCGGACACC	60.816	20	100	90	GGAATCGGGGAGAAGATCGG	59.681	20	100	100	115	359	473	GGGCCTTCATCATCGGACAC	60.816	20	97.5	92.5	GGAATCGGGGAGAAGATCGG	59.681	20	100	100	116	358	473
PolynSSR_316	AACCCT	4|AHLA_contig_120794:9-432|+	3|SCEM_1.clean_(paired)_contig_73588:688-705|-	4|TWXB_1.clean_(paired)_contig_20206:366-389|-	0.47	0	0.99	TCCTTATCCATCCCTCTCAATTCACTGAAACCCTAATAAACTAAACTGTAACAACTTCGCACTCACTGAAAACTACCAAATGGCATGTCCTGTAATTTTCACCAAGGTCAGTGGCATCTCGCAAATCCTCTCCATATCGTAATTCGTAAGCACGTAAAACCACACCTCCATCGTTCCCCTCACCAGCGCCCTTTCCACCA	AACTTGATTTCTCTCACCGTCTGGAATCTCTTCTCCTCCGGAATGGTCTGCGAGCGTTGAACAGCACGAAAGATCCCCGCCATGGACGGCGCCGTGGAGAGGAGGGAGGAACCGCCGGCGGGGAACGGCAAAGGGTCCGGCAATGGGGCGGTCCTGCCGCCGGTGGGAAGGTCATCTTACGGTGACCGTAGGTTGAGGCT	AACCACACCTCCATCGTTCC	59.964	20	100	100	TCTTTCGTGCTGTTCAACGC	59.697	20	97.5	100	140	165	304	TCACCAAGGTCAGTGGCATC	59.963	20	100	100	TCTTTCGTGCTGTTCAACGC	59.697	20	97.5	100	199	106	304	CACCAAGGTCAGTGGCATCT	59.963	20	100	100	TCTTTCGTGCTGTTCAACGC	59.697	20	97.5	100	198	107	304
PolynSSR_317	AACCCT	4|AHLA_contig_141981:635-1058|+	3|SCEM_1.clean_(paired)_contig_38545:2480-2497|-	3|TWXB_1.clean_(paired)_contig_110653:810-827|+	0.47	0	1	TCTCCATCTTCATCTTCATCTTCTAGGTCTCTTTTAGGCCATTTATGGCACCTTTTATTGATAGCAAGGAGTTAGAGCTTAGCCTTGGTTTATCTCTCTGCATCTCCACCTCCACCTCTATCTCCACAAAGTCTTTAATTTCCTCCTCCATGATTAACAAGAGAAAGGAAGTGGAGAAAACAAGGAAGAGATTAAAGCCA	AGTTACTTTGGTTTGGCTACTTTTCCTGTTCTTCCAGTGCAGTATGTTCCAGCGATTGATGGTTATGGGTTCCCATGCATGGTTCCATTCCCAGTTGGACTTGTTCCTCATCTTCCATTAATGCAGCTCTCTGCTCATCCAAATGACACTGGGGTTAGAAGACTTCATTCATGGCCTTCATCAGAGTCTTATTCTGATTC	TCTCTGCATCTCCACCTCCA	59.958	20	100	100	TCGCTGGAACATACTGCACT	59.392	20	100	100	185	294	478	TCTCTGCATCTCCACCTCCA	59.958	20	100	100	CGCTGGAACATACTGCACTG	59.277	20	100	100	184	294	477	CTCTGCATCTCCACCTCCAC	59.822	20	100	100	TCGCTGGAACATACTGCACT	59.392	20	100	100	184	295	478
PolynSSR_318	AACCCT	4|AHLA_contig_23394:14-437|+	3|SCEM_1.clean_(paired)_contig_131243:214-231|+	3|TWXB_1.clean_(paired)_contig_184521:459-476|-	0.47	0	0.98	AACAAATCAAACATCTACCTCGACCAAAACTCAATTCGTTCGCAAATTCCATCGATTCAAAATCCCAACTAGACCAAATCCCTTGTGAAATTTGAGGGAAAATCCGAGCTCAGAACGAAGAAAGCACAATAATTTCCAACTTCCACCCGTTCTTACAAAATCCACAATAAATAGTAGAAGAGTTTCCAAAGATCGCGCCA	AAAAAGGAGAACGAAACGGGATAGAGTCACTGCCGGAGACGAAGGAGGTGAGCTTACCGAATCGTATCTTAACGAGCAATTTGGCGCGCGTTCTTTTAAAAATCGTCGGCGACGAGCGGTGAGACACCGACGGCGAAGGAGCGCACCACCCGATGACGAAGGACTTTTCGGGTATTTTAACAAAGGATTTAGTAATAGAA	GTTTCCAAAGATCGCGCCAA	59.76	20	97.5	100	TTAAAAGAACGCGCGCCAAA	59.971	20	100	100	142	194	335	GTTTCCAAAGATCGCGCCAA	59.76	20	97.5	100	TTTAAAAGAACGCGCGCCAA	59.971	20	100	100	143	194	336	GTTTCCAAAGATCGCGCCAA	59.76	20	97.5	100	CGGTAAGCTCACCTCCTTCG	60.179	20	100	100	102	194	295
PolynSSR_319	AACCCT	4|AHLA_contig_36278:4829-5252|+	5|SCEM_1.clean_(paired)_contig_33729:7311-7340|+	N/A	0.5	0.33	0.99	TCTTGCATGAAAAATGGTATTTTATGCCATTTTATTATATTTCTCATTGCAAAAATATATTAATTCATATTTTAATAATAAAAAATTTTAATTATTATGCACTGTGTTGTCAACACATGTGAAAACTCTACTTAAAAATTGTCAAACTTGGATTGCTGGACGTTTGGGCCACTGCTCCTTCCGGGTCACATCCTCATGGA	AAACCTAACCTTAATTGAAAAGGAGATATCCCCACCTTCATTAAATAATGCATAGATTAATCCAAAAACACCCATCATCATCTTCATGCTTTTCAATTGGTCATGCCATCCGGTATTAATTTATCTCATTGTTGGCTCAATAAAATAATATTCAATGATTCCCTAAATTATTAGAAAATTATTTGGATCAATTATTTAAG	CGGGTCACATCCTCATGGAA	59.459	20	100	100	TAATACCGGATGGCATGACC	57.149	20	95	100	161	381	541	TTCCGGGTCACATCCTCATG	59.459	20	100	100	TAATACCGGATGGCATGACC	57.149	20	95	100	164	378	541	CGGGTCACATCCTCATGGAA	59.459	20	100	100	GGCATGACCAATTGAAAAGCA	57.957	21	95.2	100	150	381	530
PolynSSR_320	AACCCT	4|AHLA_contig_55370:1573-1996|+	N/A	2|TWXB_1.clean_(paired)_contig_99031:325-336|+	1	0.33	0.99	TTTATTGGCATAAAAGGAGAGAGGAAAATAATTAGAGGGGGGTGTGTGAAATTACAGGAAAGTTTTGGGAATAATAAATAAATTTAAAATTTTTACAGGGTTTAATATGCAAAATAAATCAATCAACACGCTTTTTCTTTGTCTTTTTGTTTTCTCATTTCCACGATTTCTTGGGTGGGACTTCGACGACCTCCGATCAA	AGCCCTAATCCATTCCTCTTGATCAATGGCTGCTCCCATGGAGATCCGGCTTTGGAACGACAAGAGGGAGAGGGAGATGTATGACAGCTTCGCAGACCTTTACGCGATCCTCAAAACGATGGAGAAGCTCGAGAAAGCATACGTTCGAGACCTCGTTGGCTCCGCCGAGTACGAGGCCGAGTGCCTCAAGCTCATCGCCC	GACTTCGACGACCTCCGATC	59.972	20	100	100	TCTCCCTCTCCCTCTTGTCG	60.034	20	100	100	123	378	500	GACTTCGACGACCTCCGATC	59.972	20	100	100	GTTCCAAAGCCGGATCTCCA	60.035	20	100	100	104	378	481	CCACGATTTCTTGGGTGGGA	59.962	20	100	80	TCTCCCTCTCCCTCTTGTCG	60.034	20	100	100	141	360	500
PolynSSR_321	AACCCT	4|AHLA_contig_77886:635-1058|+	4|SCEM_1.clean_(paired)_contig_42273:578-601|-	2|TWXB_1.clean_(paired)_contig_82116:1061-1072|-	0.94	0	0.98	CGTCGTCCTCCTCCCCGGAGGTTTCCCACCATTCCCCGGCCGAGGTCCTGAGAAATTTCAAGGAGATCCGTCGCCTACGGATCGAGCTACCCGCTGGAGAGCTCGGCGTTGAGGATGGCGTCCTTCTCAAGTGGAAGGCTGCCTTTGGCTCCACTCTCGACACCTGCGTCATTCTCGGAGCCTCCTCCGTCTCTCCCACA	ACTTCTTACCCCGATAGCCTCTGCGCTGGATCTTCCGATGACTCAGGCAGCATACCTGAGTCCTTCTACACCAACGGCAGTCTCAAGCTCCGGGTTGTCTGGACGATCAGCTCTCTGATTGCGGCGTCTGCTAGGCACTACCTCTTGCAACCGATCATTGCGGATCATGAGACACTGGAGACTCTTGATCTCACTGATGC	TTTGGCTCCACTCTCGACAC	59.966	20	100	100	TGCCGTTGGTGTAGAAGGAC	59.966	20	100	100	160	343	502	TTTGGCTCCACTCTCGACAC	59.966	20	100	100	ACTGCCGTTGGTGTAGAAGG	59.965	20	100	100	162	343	504	GGCGTCCTTCTCAAGTGGAA	59.965	20	100	100	TGCCGTTGGTGTAGAAGGAC	59.966	20	100	100	187	316	502
PolynSSR_322	AACCCT	4|AHLA_contig_96321:939-1362|+	4|SCEM_1.clean_(paired)_contig_67919:2821-2844|-	3|TWXB_1.clean_(paired)_contig_165651:450-467|+	0.47	0	0.97	NNNNNNNNNNNNNNAGTAATTTTCCCAAATTATTATGGAGCACTTCATGGGCCAACAACCCAGCCCAAAATGACCGTTAATGGGCCGTGTTCTCAAAAACATGGGCCCTGGACAGAGAATTTCTTTGCTTGTTGGTTGTCTTACGACCACGTCCCCTCACTTCCACTTCAGTGGCTGTCCTCTCCGACGACCTTCTCCAA	AATCCCATGTTGGAACTCTAGATATGGCGATCCAATTTCCCATCCCCACTCGCTTCCTTCTATCCTCCCCACCACTTCATCGTCTCCACCTTCTTCCCCCTCGCTTCGGGAACCATAGCTTTCAGCACCCATGGATGAGCTTCAGATTCCCAATCAAGTCGCTGAAGTCTGTCCGATTTGAACAGATCCTGACGAGCTCG	TCTCCGACGACCTTCTCCAA	60.251	20	100	77.5	GAAGCTCATCCATGGGTGCT	60.107	20	95	100	187	380	566	CGTCCCCTCACTTCCACTTC	60.037	20	95	100	GCGAGTGGGGATGGGAAATT	60.396	20	100	100	128	349	476	CGTCCCCTCACTTCCACTTC	60.037	20	95	100	AAGCTATGGTTCCCGAAGCG	60.462	20	100	100	196	349	544
PolynSSR_323	AACT	8|AHLA_contig_64073:1999-2430|+	6|SCEM_1.clean_(paired)_contig_32626:4530-4553|+	7|TWXB_1.clean_(paired)_contig_58821:4777-4804|+	0.82	0	0.99	GGCTTGATTCAAGATAATAAAACAAACAACTGTTGTCTTTTTCTCCAGCAAAACTGATCCCCAGTGGTCAAAAGAGATGCCACCCTCTTTGCCTTGCCGGTAATGATTACATTTGCACAGTTAATCTCTAGTCTGAAATAATTTGATCTTAATTAATGGTTTTCAGTTGAGCTGATCCATGTTCTTAAAAGAGTTCATGC	GGAGATGAATCAGTAGATAATATTCTGAAGTAAGATGTGCTGAATATGTCATCAAGAAAACATATAAACTTTTGGATGAGTGATAAATTTACAAATAGAATTGCATAGATATCATATTCAGGGTTTCATGTAAAGATTTAATCAGAATGATGATCCATAATCTAGCAAGTTGTGTCACATCACAAGCCATTCAAGAAGAA	CTCTTTGCCTTGCCGGTAAT	58.536	20	100	85	TCAGCACATCTTACTTCAGA	53.723	20	95	100	191	284	474	TTGCCTTGCCGGTAATGATT	58.154	20	100	100	TCAGCACATCTTACTTCAGA	53.723	20	95	100	187	288	474	TTTGCCTTGCCGGTAATGAT	58.154	20	100	100	TCAGCACATCTTACTTCAGA	53.723	20	95	100	188	287	474
PolynSSR_324	AACTTG	4|AHLA_contig_55898:3635-4058|+	2|SCEM_1.clean_(paired)_contig_128510:1489-1500|+	N/A	1	0.33	0.97	TGCTAGGATGTCGGCACAGGACACAACTCCAGGACATGCTTTCTCTACTGCAGTCTTTATGTTGTCAATGACATCGAATCCTCTTGCGGAGTTTAAGTTAGGATTTGCCGTCTTTTCTCCGGTGAAGCTTGAAGTATCATCTAAGAGCAATGAACCATCACAACCCTATATATGCAAGACAAACATTTATATATTAGAGA	AACTTAAATAGATAGAAAGATATGATACATTAGTGAAGCAGTCATGGAAGAAGAGCCGAAGAATGGAAGCTCCCATTCTCTTCTCCTTGTTAATGGCTGATTGAATGACTGGTTTTACAGTGGAGAGGAGATTTGGGCATGAGGATGAGTAGAAGTTGGTGGAAAGCTGAGCAGAAGAGCTGCCTAGTAAAAGGAGGTAA	GCCGTCTTTTCTCCGGTGAA	60.602	20	100	100	TGGGAGCTTCCATTCTTCGG	59.747	20	100	100	193	306	498	CGTCTTTTCTCCGGTGAAGC	59.209	20	100	100	TGGGAGCTTCCATTCTTCGG	59.747	20	100	100	191	308	498	GCCGTCTTTTCTCCGGTGA	60.005	19	100	100	TGGGAGCTTCCATTCTTCGG	59.747	20	100	100	193	306	498
PolynSSR_325	AAG	4|AHLA_contig_106769:226-637|+	N/A	3|TWXB_1.clean_(paired)_contig_80000:292-300|-	0.5	0.33	0.98	TCAATATCTTCAGCAAGATGGACAAACAGCAATGTAGAGCTATATATATCTCTCATGACATACAACATCTGCATAACACTTTGTAAGAAAGAGACCATGGATGAGATAATAGACTATCAATATTCCTTTGTGATCTTAGTACTAGTCTCAACCGTAACTCTTCTTCTAGTTCTTGTTACCTTCAACTTCAACTTGAGATC	AAAGAAGCTCCCTCCAGGTCCACAGAGAGTTCCGGTGATCGGAAACCTTAACCATCTCAGCGAGCTACCTCACCGATCCCTCCGCCGCCTTGCGGAGAAATATGGGCCGCTCATGCACCTCCAGCTAGGCCAAATCCCTGCTATCATTGTATCATCTCCGGAGGTTGCTTCTGAGGTCATGAAAACTCATGATCTTGCCT	AGTCTCAACCGTAACTCTTCTTCT	59.172	24	87.5	100	CACCGGAACTCTCTGTGGAC	60.038	20	N/A	N/A	106	343	448	AGTCTCAACCGTAACTCTTCTTCT	59.172	24	87.5	100	CCTAGCTGGAGGTGCATGAG	59.894	20	100	100	198	343	540	AGTCTCAACCGTAACTCTTCTTCT	59.172	24	87.5	100	TGAGCGGCCCATATTTCTCC	59.891	20	95	100	182	343	524
PolynSSR_326	AAG	4|AHLA_contig_10806:818-1229|+	N/A	2|TWXB_1.clean_(paired)_contig_69530:2010-2015|-	1	0.33	0.98	CCATACGATTGCAATGAGAACAAAATCGTTTGATAACCCACTCAGGAAGACACTCACGTATATGGTACTGTAATAGCGATTTATATTTTTACTATTCCACCTACCAATGTATTTTTGACCATCGAATCAAATTAATCTTGACCGTCCATTAATTTCTTGAATGGATATAAATACCCTTTTGTATTGTATTTTGGAGATAA	AAATAATGAAATGTGCAATAGAAGTAAGGGTGTTGGGTACTTTTCCTCTTATCTTATATGTTCATATTTTTATCTCATATATTTATTATGAAAATTTATATATTTGTTTATGTTCTGGACAAATTACTAGTTGGTTTTACAATATTGTTATAATTATATGCAATAAATTTAAAACTGATTTCACTAAAAGAAAAGATTAA	ACACTCACGTATATGGTACTGT	56.4	22	100	100	CCCAACACCCTTACTTCTATTGC	59.305	23	100	100	200	249	448	ACTATTCCACCTACCAATGT	53.29	20	100	100	GGAAAAGTACCCAACACCCT	57.33	20	100	100	168	290	457	GACACTCACGTATATGGTACTGT	57.504	23	100	100	CCAACACCCTTACTTCTATTGCAC	59.844	24	100	100	200	248	447
PolynSSR_327	AAG	4|AHLA_contig_121518:220-631|+	2|SCEM_1.clean_(paired)_contig_139960:962-967|-	2|TWXB_1.clean_(paired)_contig_141203:1189-1194|+	0.94	0	0.63	ACACGAAATTAAGCGGAAGTTCCTATTTGCGTTTATGAAGCGGAAAACGACTTCCCATAGTTCCGATCACTAACCAGCTCCGCCGATCTCTGAGATCGGTTGTCGAAGGGCCTCCCAATCGCCTCATTCTCCTCCGAAATGGAAGAAGAGAATCTCTGCATAGATGGCAGAGGGGCGGCAGAGCCGGATCCGGCGCCGGC	CTCTTGCTGCCGTGAGATGCTTCTCTTGGAATTCCCCGATAAGTTCGTCATCAGATCCAGCGATCCCCGCTTTCCCGACATCGCCTTCTCCGTTGGCCGCTCGGATGGCGTCTTGCATCCCCTCTCTATCGGTATTCTTGCTGAATTCCAGCAATTTGATGATATTGTTTTTCATTTTTCTTCAATTGATTCGATTTGGT	CGCCTCATTCTCCTCCGAAA	59.824	20	95	100	GGGGATCGCTGGATCTGATG	60.037	20	100	100	161	319	479	CGCCTCATTCTCCTCCGAAA	59.824	20	95	100	AGAAGGCGATGTCGGGAAAG	60.108	20	100	100	182	319	500	CGCCTCATTCTCCTCCGAAA	59.824	20	95	100	GAGAAGGCGATGTCGGGAAA	60.108	20	95	100	183	319	501
PolynSSR_328	AAG	4|AHLA_contig_13437:99-510|+	N/A	3|TWXB_1.clean_(paired)_contig_14940:1218-1226|-	0.5	0.33	0.97	AGTCATCGGCAAACATCAAATGGTTAAAATTATTCCGGCAGTTAACATCAAAACCAGGAATCAAATTGTTTCTCAAGTCATAGTTCAAAAGCAAGCACAAATTTTGAGACACAAGAATAAACAAGAAAGGGGACAATGGGTCACCCTGCCACGATGAGGCCTCGACCACCTCGTGGGATTCCCATTGATAAGAAGAGAGA	AAATGCAAGCCCGGACCCAAGAAATTCAATTTGCAGGCAAATGCATGAGTTTTAAGGTTGCAAGAACAGTGTTCCACTCTACCATGTCATAGGCTTTCTCGGTATCAATTTTCAAAAGCATCCTAGAAAAGTTTTTGGCGTCATATTCCATAGAATGAAGAGCTTCCTGGACAACAAGAATATTATCCGAGATAGACTTG	ACAAGAAAGGGGACAATGGGT	59.497	21	100	100	AATTTCTTGGGTCCGGGCTT	59.886	20	100	100	118	218	335	ACAAGAAAGGGGACAATGGGT	59.497	21	100	100	ATTTCTTGGGTCCGGGCTTG	60.612	20	100	100	117	218	334	AACAAGAAAGGGGACAATGGGT	60.091	22	100	100	AATTTCTTGGGTCCGGGCTT	59.886	20	100	100	119	217	335
PolynSSR_329	AAG	4|AHLA_contig_135754:27-438|+	N/A	2|TWXB_1.clean_(paired)_contig_116981:286-291|+	1	0.33	0.74	TGTGTGTATTTTATATCAAAATTATAATTTTTCTTGAACCATTCTCTTATATATATACAAATGATTAAAGGGTTCAATGATGATGCTGCATTACAACACGGAAGCAGTAAAGATTGTAATGGTGATAAGAGGAAGAGGGCATTTAGAGATGGCTTGCCCACACACAGAAAGCAAGGAACGTAGAAGAGAAAGCGAGCAAC	CAGCAGGAGGAGAAGGGCAAGGAAAACAAGAAGGGAGAGAATATTATCAGAGTATTAAATCAGCGCTAAGTCCAGGCAAATTAGCAGTTGTCCCTGCTGGTCACCCTAGTGCCAGTATTGCTTCCGAAGATGAAAATCTTATGCTTCTGTGCTTTGGCATTAGAGCTGAGAACAACCGGAGGATCTTCCTTACAGGTATA	GCCCACACACAGAAAGCAAG	59.969	20	100	100	GCCTGGACTTAGCGCTGATT	60.463	20	100	100	134	181	314	CTTGCCCACACACAGAAAGC	59.969	20	100	100	GCCTGGACTTAGCGCTGATT	60.463	20	100	100	137	178	314	GCTTGCCCACACACAGAAAG	59.969	20	100	100	GCCTGGACTTAGCGCTGATT	60.463	20	100	100	138	177	314
PolynSSR_330	AAG	4|AHLA_contig_144690:229-640|+	6|SCEM_1.clean_(paired)_contig_30915:425-442|+	5|TWXB_1.clean_(paired)_contig_35200:1245-1259|+	0.82	0	0.98	CATCTAACTAGCCAGCTATAAAAAATTAACTATTAAAGGCAAATGGCTTAAACACCTTTTGGTGTTCATCTAGTTGTTCTTTGGAGGATGACTTTTGGGGAAATGGTAATCAGAACTGATGAAAGGGAGACTTCTCTTACTTAGTTCACAATCTAAATTCAGCTCCCCTTTTGATCCTCCATTCCCACAATATTTTGAAT	AATAAGATTTAACTTTCACTGCTGCTTTTTGCTTCTCCATAACTTTCTCTGATTTCATCTTCCTCCCTTTGATGCCAGATGCATTTGTACTAATTTCTGCATTACTGCAGCTTCTAAGTTTCTGAAAACATAGATTATATTTAACTAATAAATTACCTTGATGCAAAACAAAAATGAATATATAACTTCTTCATATATAT	GCTCCCCTTTTGATCCTCCA	59.374	20	100	100	CATCTGGCATCAAAGGGAGGA	59.786	21	100	83.33	132	361	492	GCTCCCCTTTTGATCCTCCA	59.374	20	100	100	CTGGCATCAAAGGGAGGAAGA	59.717	21	100	76.19	129	361	489	GCTCCCCTTTTGATCCTCCA	59.374	20	100	100	TCTGGCATCAAAGGGAGGAAG	59.717	21	100	78.57	130	361	490
PolynSSR_331	AAG	4|AHLA_contig_1661:2267-2678|+	N/A	3|TWXB_1.clean_(paired)_contig_143841:1171-1179|+	0.5	0.33	0.99	TATTCGGTACATAATTTGCATATTGAATTTGGAATAAAACAACAAATACAGTCTTTTCAGTCTTTCCATATCGAATTTGTACTACCAACAAACCAAAAAGTAAACAAATGTAGAGATGGGGAGAGTGCAAATAAACTCAAGAGCAACTCAGAACAGAATAATAACTACAAAATTACGTCCAAAATGACAAACTCTAGGAA	ATGAAATTGAGGGATTGGCTCTGTTAACTAATAGGAAAGTTGTTCTTTTATTCGGCTAGCTGGTGCTGCCCTTTTGTTTGAGAGTAATCTTATCTCCTAAGCTGAGGGCAATTCCTTGAGTTTTGCTCCTGATTCTAATATAGCCGCTGAGTTTCCCATCGGACTGCTTCTCAACGCTGATGTTCACCAGGGCATCCTCG	TGTAGAGATGGGGAGAGTGCA	59.993	21	100	100	CAAACAAAAGGGCAGCACCA	59.822	20	100	100	184	308	491	TGTAGAGATGGGGAGAGTGCA	59.993	21	100	100	AAACAAAAGGGCAGCACCAG	59.535	20	100	100	183	308	490	AGAGATGGGGAGAGTGCAAA	58.339	20	100	100	CAAACAAAAGGGCAGCACCA	59.822	20	100	100	181	311	491
PolynSSR_332	AAG	4|AHLA_contig_19007:9529-9940|+	N/A	3|TWXB_1.clean_(paired)_contig_38304:1509-1517|+	0.5	0.33	0.99	TGTGGAGTTCTTTACTCAGTGCTTGCAGGATTCATGGGAATGTTTCACTTGCTGAGAGCATCATGAGACAAGTTGACAATGATAATGAAGAAGATGAAGACTATTATGTGCTCATGTCTAACATATACAGAGAGGCCAAGAGAGGAAGAGATGCAAGTAGTCTACATACGGAGATGAGAAGGAAGAGAAAAGGTAAGAAT	GAACCAGGATGCAGTCTGATTGAGATCAATGGAGAGGTACATGAGTTCAAGATGGGCTCAGTCTCACATCCTCAAACAAAAGCTATACATCACATGCTTCATAACATTCACACTCATCTTCAATATCATCATTAGATCTCAAACACACCAGTTACAAACCATGCATAAAATGGAAAACATATTCACATATATATATTACA	ACAGAGAGGCCAAGAGAGGA	59.589	20	100	100	GGATGTGAGACTGAGCCCAT	59.164	20	100	100	157	326	482	ACAGAGAGGCCAAGAGAGGA	59.589	20	100	100	GGATGTGAGACTGAGCCCATC	60.203	21	100	100	157	326	482	ACAGAGAGGCCAAGAGAGGA	59.589	20	100	100	TGTGAGACTGAGCCCATCTTG	59.723	21	100	100	154	326	479
PolynSSR_333	AAG	4|AHLA_contig_2326:1881-2292|+	2|SCEM_1.clean_(paired)_contig_90457:1696-1701|-	2|TWXB_1.clean_(paired)_contig_172101:726-731|+	0.94	0	0.79	AAATAATCCAATTGGCAGAAATATGATGAATGCCTTATTTACTAAGCATCATACATATACAATACCAATTTGTATGTTAAAAATTGGGTCAATATCATTGTTCCTCAAACATAGCATCATCAACCTCTTCAACAAAATCATGTTAGCAGGAATCTTTGAGAATTTAGTAGGGAATCCATGGCAAATCAGCCAAAATAAAA	AAATCCAATTCCCGTAGTCATGAAGTCTGCAATTAAAAAACTTTGATATTCAGATTAACCATTAACCTTAAGTACAAATTCATCATGTTCAAATAAGTGCACAGTAATGAATACATTGAGTTCTCAGATTACTCAGTGTAGCATATGCACTATCTTTCATTTCAGAAGAGCTGGCTAATTTTACTCTTCAAGTGGCACAA	GGGAATCCATGGCAAATCAGC	59.93	21	100	100	AGTGCATATGCTACACTGAGT	56.82	21	97.6	100	194	369	562	GGGAATCCATGGCAAATCAGC	59.93	21	100	100	GTGCATATGCTACACTGAGT	55.265	20	97.5	100	193	369	561	GGGAATCCATGGCAAATCAGC	59.93	21	100	100	AGTGCATATGCTACACTGAG	54.964	20	97.5	100	194	369	562
PolynSSR_334	AAG	4|AHLA_contig_30865:1234-1645|+	2|SCEM_1.clean_(paired)_contig_71032:454-459|+	4|TWXB_1.clean_(paired)_contig_61807:1512-1523|+	0.94	0	0.99	TCTTCTTGTTCAACTCTTCCATCCTATTGATGAAATCATCTCTGCAAATACAAAGGATGAGACTATTCAGCCATATATAGTGAAACAAAGATCATAAGACAGGGATCATTATATATATACCGCAGAACTCCCATCTCATTCTTCAATCAGCATGCAACCATTAGACACATACCAGAAGATAGTCAGGAAAGGAGTCACCA	AAACGAAATAAACCCTAGCTTCGGAATGTCACCTTAATCTGATCAATTGCACGTCTGAGGTCAGCTATCTCCCCTTGAAACAGAGAAATCCTCGCCTGAAACCAAACATGCATCCATTATTAATCCGAGAGTGAAGAGCAGAATCAATGGATTATCTTCCATCAATTTGAAGAATAGAAGAGCAGAGAAAGACCAGTTGG	CCGCAGAACTCCCATCTCAT	59.533	20	100	100	GCTGACCTCAGACGTGCAAT	60.672	20	100	95	158	319	476	CCGCAGAACTCCCATCTCAT	59.533	20	100	100	TAGCTGACCTCAGACGTGCA	60.894	20	100	85	160	319	478	CCGCAGAACTCCCATCTCAT	59.533	20	100	100	AGGGGAGATAGCTGACCTCA	59.063	20	N/A	N/A	168	319	486
PolynSSR_335	AAG	4|AHLA_contig_33758:1551-1962|+	3|SCEM_1.clean_(paired)_contig_120406:4637-4645|-	3|TWXB_1.clean_(paired)_contig_151052:401-409|-	0.47	0	0.99	AAGCCTCCAAGAAGCGCTGCTTAATAGAAAATAGATGAAGCAAGTTTCAAGTTTGTATATGCTCCTTGTGCAATCAAAATCCCAAGACCTACCCAATAGAAGCCAAATCAGCAGATGGTACTTCTGATGCAGGAGAGGTAGAGCTCGGTGGCTTGTCCGGCAAAGTACCATTCGTTTTCAGAACTAAAATGGTAGGAATA	AAAAATATATTGGATCAGCAAATTAGAATACAATGTATACAACACCATCTCTCGAATGGTGAAGGGTTTAATTCTGATCAGAATACTTTATGAAGTCCAAGATTTCATGTTAGAAGTTAAAGCAAGTATAGCCAAGTGCAACTAGTTTTGTGTGTTTATAGGTCTACATACCGTGAATATGACATGGATTTTGTGCTTTT	CAGGAGAGGTAGAGCTCGGT	60.107	20	97.5	100	ACCCTTCACCATTCGAGAGA	58.061	20	95	100	150	329	478	TCCGGCAAAGTACCATTCGT	59.678	20	100	100	ACCCTTCACCATTCGAGAGA	58.061	20	95	100	124	355	478	CAGGAGAGGTAGAGCTCGGT	60.107	20	97.5	100	CCTTCACCATTCGAGAGATGGT	59.831	22	95.5	100	148	329	476
PolynSSR_336	AAG	4|AHLA_contig_35658:5170-5581|+	N/A	8|TWXB_1.clean_(paired)_contig_31339:629-652|-	2	0.33	0.95	AAATGCTCTTTTACACAATCAATTAAGCTCTCCTAATCTTGTGTCTAGAATTAGCACTTGTTAAATAAATGCCTTTGGTTTTAATTTTTCTAACCATGTTAAAGATGGGGAGTTCATTCAAGGAGTCTATATTCGATGAGAATGTTCGAGAGGGGCTCGTCGGATGGGCTCAAAGCGCTCACAAGCTAAAGAAGAAGAAA	AAAGGAGTTGGAGTTGCCATGGAGGATATCGTCTCGGAGGACAGGAATTCGGCACCTTCAAGTGTCATGTTGCACGATATGGTTACTCAACAGTCACCATGATCCTTCTTCTATCATGGAAGAAGGCAGCTTGAAGAAGATCACTTAGCATAAATTTACTTTAGTCTTTTTTTTTGAAAAATAAAATACTATACGTTCTG	CTCGTCGGATGGGCTCAAAG	60.808	20	100	100	TTCCTGTCCTCCGAGACGAT	60.034	20	N/A	N/A	104	355	458	CTCGTCGGATGGGCTCAAAG	60.808	20	100	100	ATTCCTGTCCTCCGAGACGA	60.034	20	88.9	90	105	355	459	CTCGTCGGATGGGCTCAAAG	60.808	20	100	100	TGACACTTGAAGGTGCCGAA	59.821	20	95	100	124	355	478
PolynSSR_337	AAG	4|AHLA_contig_35826:1055-1466|+	3|SCEM_1.clean_(paired)_contig_87395:1109-1117|-	3|TWXB_1.clean_(paired)_contig_1424:994-1002|+	0.47	0	0.99	ATACTTGTAATTTGGATAGAGGACTCCTCCTGTTTTGGCCCCACTTCATAAATCATCCCTGGTTCAGCAGAGCATTGGTTGGACTAGAAAACAGGAATTAGAAGATAAGGTCTCTTCATATTTGAAATTTGAAATCATTTTTTGTTATATGAAATAATCTGTTTGTATAGTAAATTTTAATAATTGCTTTTATGTGAAAA	AAATGTTTAAAACTTTTACATTTTAAGTACAAACATTGCACCATTTTATTAGGGATTCAGAAGGGACAAATTCAATCAATTGATTCTTGAAATATGTGAACAAAATAAATAATTAAAATAAATGAAGTCGATCTGTTGTTTTCAGAGCATCATCTATTTTGTTGAAACTACAAGAGTCTAAACAACAAGCCAATGAACAA	Primers not available
PolynSSR_338	AAG	4|AHLA_contig_36850:1941-2352|+	2|SCEM_1.clean_(paired)_contig_49031:268-273|+	N/A	1	0.33	0.97	TTCCTTTTTTTCTATTTTGTATTGTCCAGTACTATTATTCACTATTTATTACTGTACATGGATCAATCATAATCATCGGATTTAAATCCAATGGTTACTGTAGCATCCATAGATTTAAAAATCTAGAGATATCTCTAGATGATGTGCCCTTTATATATTTGTATATATCATTCATTTTCTCTTTTGAAGGAAAGGAAGCT	ATTGAATGGTGCATCTGGTCTTTGAAGGCTATTTTTTGAAATTCATTTGAAATAAAAAAGGTTTTTTATAATTTAAAAAGATTTTATTTTTAAATTTATCGAATACCTCTCATGGTGTCAAACTAGTCATACTGAGCTGACACAATTTAAGTTTGACGGGGACCTACATGATATGTGTCTGATGCAGCTTAAATATTGTG	TCCAATGGTTACTGTAGCATCCA	59.478	23	95.7	100	AGCCTTCAAAGACCAGATGCA	59.926	21	95.2	100	156	286	441	TCCAATGGTTACTGTAGCATCCA	59.478	23	95.7	100	GCCTTCAAAGACCAGATGCAC	59.799	21	95.2	100	155	286	440	CCAATGGTTACTGTAGCATCCA	58.115	22	95.5	100	AGCCTTCAAAGACCAGATGCA	59.926	21	95.2	100	155	287	441
PolynSSR_339	AAG	4|AHLA_contig_43829:558-969|+	4|SCEM_1.clean_(paired)_contig_48833:1778-1789|-	5|TWXB_1.clean_(paired)_contig_100472:254-268|-	0.47	0	0.99	TCTTTTTTTTTTTGGTTTTGGGGATCTGGGGGGTTCCGTTGTTGTTTGGAAAGCTGAGGAACCCTAACCCTAACCTGTATCTTGTTGTTGTGGCTTTGTGGTCATTGAGGAGATAAGAAATGCACGGAGGAAGGAACAGGAAGGATGATTTGCCGAAGATCAATAACACCAACATTTTTGCGGCACTGGAGACGCTGAAA	TCGGACAAGGATCAGGGCAAAAGCAAAGCGTCGTCGAAAACCCTGGTCAAGGAGCCAGAGCCGCCTGTTTTCTGGGCGCCAGCACCGCTGACAAAGAAGTGGGCTGATGTTGAAGATGAAGATGAGGACGATTACTTTGAGACCACTGCACCGCCCAGTAACGTGTGGGGCACTTCGGAGCCTCGGCAGGCCAAGGAGAC	ATGCACGGAGGAAGGAACAG	60.036	20	100	90	CGCTTTGCTTTTGCCCTGAT	60.038	20	97.5	100	123	319	441	ATGCACGGAGGAAGGAACAG	60.036	20	100	90	GTTTTCGACGACGCTTTGCT	60.042	20	100	100	134	319	452	ATGCACGGAGGAAGGAACAG	60.036	20	100	90	TCGACGACGCTTTGCTTTTG	60.043	20	100	100	130	319	448
PolynSSR_340	AAG	4|AHLA_contig_4418:1867-2278|+	5|SCEM_1.clean_(paired)_contig_3320:1042-1056|-	N/A	0.5	0.33	0.99	TTAATTTCCATCCCTAGAGCCAATGTGGCACCAGGTGGCATCCGATCGTGAATACATGAATGTTTTATTGCCTTTGTTTGTTGGCATTATTTCTGGCATGGCTTCCATAGTTGGTATTGGATGCCAAATTAACATTTGTGTGAAATAAAAATATTAATGCTTTTGATTTTTTTTAACTTGCCTATTAATAATAGAAGAAA	TTAAAGATAGGAAGGTAATTGTTGTTGGATTAAAGAGCAAAAGAGAATACTTACAAGTTAAAGAACACAATTACATACAAAAATTAAACCAAAGCAACAAGGAATCATTTGAGAATTAGAAGATAGGCCAAATATGATAACTTTGCCCCATCCTGCCTACAATGCATGAAGAAGTACTACTTGAGTGCAGCAGCGAATGG	TGGCATGGCTTCCATAGTTG	58.234	20	100	85	TCCAACAACAATTACCTTCC	53.376	20	95	100	148	293	440	GCATGGCTTCCATAGTTGGT	58.232	20	100	95	TCCAACAACAATTACCTTCC	53.376	20	95	100	146	295	440	TGGCATGGCTTCCATAGTTG	58.234	20	100	85	CCAACAACAATTACCTTCCT	53.359	20	95	100	147	293	439
PolynSSR_341	AAG	4|AHLA_contig_48731:1350-1761|+	6|SCEM_1.clean_(paired)_contig_28773:369-386|-	N/A	1	0.33	0.98	GCATCTACAAATTCAATTACAGAAATCAGGAAACAATTCAGGAACATATAAAAACCAAAGATAAAATCCCTACCTCAGTGCGCGCGATACTGTAAATGGCGTGTCCCGTGTTCTTATAGGATGGAAGATTGGCAAATCTTCCATCATTCACTACAAACCCAAATAAGATCAACAGTTGAACCTCAACATCAGGCAACAAC	AGTGTTGATGAAAAAGGAAAAAGGAAGAAGACCTTGGAATCTGGTGCGAACAACATCGAGAGGATGGAGAATGGCAACAGTGGAGAAACCAGCGACAGCCCCGGCAGTGGCATTCTCCCACTTCCAGTTCAGTGCATGGAATAGCGGCATCGTCGCCGGCTGAAATGAATCTAGCCTCCGAGCAGTCCAAACAATCGATT	CGCGCGATACTGTAAATGGC	60.111	20	N/A	N/A	TCGATGTTGTTCGCACCAGA	59.967	20	100	100	191	280	470	CGCGCGATACTGTAAATGGC	60.111	20	N/A	N/A	TCTCGATGTTGTTCGCACCA	59.967	20	100	100	193	280	472	GCGCGCGATACTGTAAATGG	60.111	20	N/A	N/A	TCGATGTTGTTCGCACCAGA	59.967	20	100	100	192	279	470
PolynSSR_342	AAG	4|AHLA_contig_51693:2998-3409|+	2|SCEM_1.clean_(paired)_contig_146190:768-773|-	N/A	1	0.33	0.98	TGTACCCCACAACCCATTGCTAAATATCTATCCTATCACAAGCTTTCAACCAAGCATAGGGCATTTTCCTCTAAGATCTCTCGCCTATTTGTTCCTATAAGCATCATGAGCACAGGATGACACCAACAGGAATTGGTCATTATAGAGGAAACAAATGCTATCAAGACAAGTAGGACATGGAAAATTGATGACCTTCAAAA	AAAGAAGATAGTCGGGTGTAAGTGAGTTTTTACTGTGAGCGTAAGGTGGGTGGTAGCAAAGAAACATACAAAGCTAAGCTTGTTGTAAAGGGATTTACATAAACATACAGAATAAATTATGAACAAATGTTTGCTCTAACAGTAAAGATCAGTTTTATCTGGATTCTATTATTCTTGGCTATGAACTTTAACTAGTCCTT	AGCACAGGATGACACCAACA	59.526	20	100	100	TTGCTACCACCCACCTTACG	59.678	20	100	100	163	308	470	AGCACAGGATGACACCAACA	59.526	20	100	100	TACCACCCACCTTACGCTCA	60.542	20	100	100	159	308	466	TGAGCACAGGATGACACCAA	59.236	20	100	100	TTGCTACCACCCACCTTACG	59.678	20	100	100	165	306	470
PolynSSR_343	AAG	4|AHLA_contig_5314:763-1174|+	N/A	3|TWXB_1.clean_(paired)_contig_171333:240-248|-	0.5	0.33	0.99	AATCCTGCTTCGTTACATCAACATTGCTAACACAATCAATAGAAACAATCAAAATAATAACTGAAGAATTAATTCAAGTGAAAAGATTAGAGAGTTTGATAAGGCTCCATAAGGCATATTGTGATCCAGTTGAATTGCTTGAAAACCTGTAACAATGTCAGATATAACCATATAAAATGCACCAAAGTAGTAGATGGTAA	TAGAAAACCACAGATTCTTTTCTCTCTTTAACTTGTAATGAATCAGTACTACGTCAAGCAACAACTATAATTTGTTGCCAGTCAGAGTAATATATATAATTTTGATCATAGTTTGAAGTACATGATAACTAAGCATTTACATCAACTCTGAGCTTTACGATGGGATGAATCATTGCTTCTTTTCATACGCTAAACAATTT	TGCACCAAAGTAGTAGATGGT	56.65	21	100	100	TCCCATCGTAAAGCTCAGAGT	58.542	21	100	100	200	377	576	TGCACCAAAGTAGTAGATGGT	56.65	21	100	100	TCCCATCGTAAAGCTCAGAGTT	59.168	22	100	100	200	377	576	TGCACCAAAGTAGTAGATGGT	56.65	21	100	100	CCCATCGTAAAGCTCAGAGTTG	59.067	22	100	100	199	377	575
PolynSSR_344	AAG	4|AHLA_contig_55721:742-1153|+	2|SCEM_1.clean_(paired)_contig_110051:179-184|+	N/A	1	0.33	0.74	TGACCCTGCGATTTCAAGCATGAGACTAATCAAGATTTCAATAAGGAGAGAAAACAAGAGAATAATACTTAACAACATTCTTCATATAGAAACAATGCAAGAATGAAATCTCAAGAATCTTCATCCATCACAAAGCCTAGATCTAGGATGAAAGCTATGGAGAAACAAAGAGAAGAAGTTTGTCATACCTTGATGACTTC	AAAAAGAAGAAGTGGTGGATTAATTTTAATCCATAGGCAAAGGAGGTGGAGATGATGGGGAAGGGCTTTTCATTCAAGAAATATGAAGGAGGAATGAAAGGTTAAAAGGGGAAGAAAAATGGAGAAAAGACGACAATACTCTCGCTTTAAAAACTTGGAAAATGGCTTTACACGGGCGTATAACTCTTGCACAATTGTGT	TCTTCATCCATCACAAAGCCT	57.273	21	100	100	CCCCATCATCTCCACCTCCT	60.401	20	100	100	155	317	471	TCTTCATCCATCACAAAGCCT	57.273	21	100	100	CCCTTCCCCATCATCTCCAC	59.524	20	100	100	160	317	476	TCTTCATCCATCACAAAGCCT	57.273	21	100	100	TCATCTCCACCTCCTTTGCC	59.379	20	100	100	150	317	466
PolynSSR_345	AAG	4|AHLA_contig_70686:504-915|+	N/A	2|TWXB_1.clean_(paired)_contig_93713:607-612|+	1	0.33	0.66	AAGAAGTGGAAGGACTAATAGTATTCCGGTTCTCCAATGTTTGCAGGTCTTTTCACACAGTCAACCTCCATGTTGTCTCTCCAAAATGTAGCCTCAACTTCACACTTGAAGATGCTCTCGGGCAGATACTTTGCACAATGGCTCAACCTCACAAAACTCTAATGTCCTCGTATTCTGGCTTGCATGATGGAGAAGAAAAC	ATGAAGAAGATGAGGGAGAAGAGAGGTCGGTTGAGCTGTCCAATATGACTTGCTGACAAGGATGAAGGCCTTGATGACAAGGACAGAACAACATAAGGCGGCATAAGTTAGCCTGGTGGCAATCCCCATCAGTAAGTGATGTGTCCAATATGTAGTCACGTGTGTATTACGATTACCACGTGTATAAAAACCCACCGGAA	TGCACAATGGCTCAACCTCA	60.179	20	100	100	CCGACCTCTCTTCTCCCTCA	60.034	20	95	100	111	331	441	TGCACAATGGCTCAACCTCA	60.179	20	100	100	AGGCCTTCATCCTTGTCAGC	60.035	20	N/A	N/A	152	331	482	GCACAATGGCTCAACCTCAC	59.758	20	100	100	CCGACCTCTCTTCTCCCTCA	60.034	20	95	100	110	332	441
PolynSSR_346	AAG	4|AHLA_contig_76047:1258-1669|+	4|SCEM_1.clean_(paired)_contig_21422:3661-3672|+	2|TWXB_1.clean_(paired)_contig_28147:3711-3716|-	0.94	0	0.99	CATTTTCTTAATGGTTTGATAAAAAGACCATTTTTTCCTTGCTTGGAAGCAGTTCCTAAATTTATATTGGTCTTATTGTTATGGTTTTGTGCTTCTTTGTTAATATCTTTAACCATAACAAAGAAACATCTTCTTTTTCTTTCCAAATGCTTATAAGTGAATTTATAAAATGATGGCATCATAATTGTAGAGACACACGA	AATCAACTAAATGAATTGAGAACTTAAGAAAATTTTGAATAAGTTTGGTTGATCGAAAAAATTTTGATATTAGGGTATGCTGTTTTTAACAGCATGATATTACCTATGTTCATCTTGATTCCCTCAATTATCTGGTCATAATTTAAAACAAGTTGATAAACATATCTATTGCTTCAATTAGCTGTTCTTCTGCGCCCCTT	GCATCATAATTGTAGAGACACACG	58.033	24	100	100	TGAGGGAATCAAGATGAACATAGG	58.066	24	100	100	163	375	537	GCATCATAATTGTAGAGACACACG	58.033	24	100	100	GAGGGAATCAAGATGAACATAGGT	58.065	24	100	100	162	375	536	GCATCATAATTGTAGAGACACACG	58.033	24	100	100	TGAGGGAATCAAGATGAACA	53.938	20	100	100	163	375	537
PolynSSR_347	AAG	4|AHLA_contig_76356:2618-3029|+	6|SCEM_1.clean_(paired)_contig_107928:1717-1734|+	N/A	1	0.33	0.98	ATAAGGACATCTCTGCTTATGATCTTAGGTTGCTAAAGGTGCAGAAAAGGATGGAGAAGCGAGCGGTTACAATGATACATGAGTTTCTATCACTTACTATAGAGACGAAGATGATACTAGAAAGGATCACTTAGTTCAAAGAGGCAATCGGGGTGCTGAAGAAGCTCAAGGAGTTCATGTTGTTGACGAGGAAGAAGAGA	TAGAAGGGGCTGCTAATGTGGCGTACTCATGACGTTATTTGTTGACCTAGGTCAGTTGCCATGTGGCCTTTCCAGGTGAGCAAGTGAACTAGAAATAGGGAGTCCACATCAGATCTCTGGTGGACACGTCAGCATTTAATCACCGGAATAGCCTCTGTGCGCTCCCAATGAAATAAAATTAAAATGAAATGCTCATTTTG	GATGGAGAAGCGAGCGGTTA	59.898	20	95	100	CCACATTAGCAGCCCCTTCT	59.743	20	95	100	184	249	432	GATGGAGAAGCGAGCGGTTA	59.898	20	95	100	AACGTCATGAGTACGCCACA	59.684	20	N/A	N/A	199	249	447	ATGGAGAAGCGAGCGGTTAC	60.179	20	95	100	CCACATTAGCAGCCCCTTCT	59.743	20	95	100	183	250	432
PolynSSR_348	AAG	4|AHLA_contig_80713:458-869|+	N/A	3|TWXB_1.clean_(paired)_contig_1805:4271-4279|-	0.5	0.33	0.98	TAGGAACTAGAATGGAAACAACTGATGATTCAGGAACAATCTCAGATTCTGTCCGTGACAAGCAGAACAAAGAGAGTATCTTTTCTCTATACTTGCCGGAGGGTTGCTGGAGATGGACACCGTATCGGAGGGCTAGCTTGATGCTCACTTGAAGAAGGAGAGTATTAGCTCAGTTGGAGAAATGAGAGTTCGTCCATGGC	CTTAAAAAGCTAGTAGGGAAGCGCGCAGGTCAACAAGGGGTGCTATATCCGAAAATTTCGAATCTGGGTTGGGAGCAAGGGCCCTGCCCCCACATTTTGGTACTCGTGCTGTGTCACCAGTTCATAACATGGTTACAAAGCCCTTTTATTTGAGATAAGTCTAACACATTCTCCCTTTGATTCTCTAAAAAATCAATACA	CGTATCGGAGGGCTAGCTTG	60.039	20	100	100	GCTCCCAACCCAGATTCGAA	60.035	20	N/A	N/A	168	320	487	CGTATCGGAGGGCTAGCTTG	60.039	20	100	100	CCTTGCTCCCAACCCAGATT	59.96	20	N/A	N/A	172	320	491	GAGGGTTGCTGGAGATGGAC	60.107	20	100	100	GCTCCCAACCCAGATTCGAA	60.035	20	N/A	N/A	190	298	487
PolynSSR_349	AAG	4|AHLA_contig_94417:123-534|+	N/A	3|TWXB_1.clean_(paired)_contig_74823:1663-1671|-	0.5	0.33	0.98	CATCATACTCATGATCTCAAACGTGTTATTCAGTGGATAACTGTTAACCTACTGCTATAAATAGCCCGTCTCATTTAAACATGAAGGATCCTTTTTCGTGTATTCGAGACAGAAGCTATAATATTTCGTCTTTGCTAACTTAACCATCAGAGTGTTTGTGGGGAATACTTCCCATACTGTTATAAATTCAGGACTTCCCA	CTCGATTTCCTTCAAGTTAAGATCCAACTTTCAAATTTTAAGGTCTATAAACTTACTGTCAATCCCTTATAAATTCACTGTTGTATGAGCCAACAACAAACAGATTAATTAATTAAAATTATTCATAATTCACAGTTCAAAAGAAGGATATATATTGAGCATATGTTAAGAATTGGAAAATCAATTTTTAGCTATTAACC	CCATCAGAGTGTTTGTGGGGAA	60.489	22	95.5	100	TCTGTTTGTTGTTGGCTCAT	55.77	20	95	100	173	265	437	CCATCAGAGTGTTTGTGGGGAA	60.489	22	95.5	100	ATCTGTTTGTTGTTGGCTCA	55.77	20	95	100	174	265	438	CCATCAGAGTGTTTGTGGGGAA	60.489	22	95.5	100	GTTGGCTCATACAACAGTGA	55.686	20	95	100	163	265	427
PolynSSR_350	AAG	5|AHLA_contig_107760:385-799|+	6|SCEM_1.clean_(paired)_contig_28882:1640-1657|+	N/A	0.5	0.33	0.97	GCTTGGCAGTGTATGTAGGAGAGGACTTACGTAGGTTTGTGATACCGGTGAGCTATCTCTGCCAACCGGAGTTTCAGGCGTAGAGGGAGAAAGTTGCAGAGGAGTTTGGCTTTGAGCAGACCGGAGGCCTTCGCATTCCATGTAATGAGGAAGCCTTTGAGGAGATCCTTCATGTCTTGGGGGGCACTGTTGCAAGGAAC	AAAAATGACAAGAGTCTTAGGATGAACTAGGCTAAACCATCCATTCGAATTGATGCATTTGATGATGATCACAGATTGAAACAATTCTGTCTTGAATCTTGTAATTTATTAGATTTTTCCTTCTGAAGAGATTTTTCTGCAACACTGACAAGAGGAAAACTAACTTTGCTGCTAACTCAAATGAAGCAGTGTACTGATAA	AACCGGAGTTTCAGGCGTAG	60.038	20	100	90	TCGAATGGATGGTTTAGCCT	56.605	20	100	100	200	263	462	CGGAGTTTCAGGCGTAGAGG	60.179	20	100	75	TCGAATGGATGGTTTAGCCT	56.605	20	100	100	197	266	462	CCGGAGTTTCAGGCGTAGAG	60.179	20	100	80	TCGAATGGATGGTTTAGCCT	56.605	20	100	100	198	265	462
PolynSSR_351	AAG	5|AHLA_contig_111689:1258-1672|+	5|SCEM_1.clean_(paired)_contig_9238:2115-2129|-	7|TWXB_1.clean_(paired)_contig_172464:2095-2115|-	0.94	0	0.98	CTGGTAGTTAATGGTTGGCTCGCAATCACATCTTCAAAGCATGAAGTTATCATCTTAATGTCATCCCATATTGTTAGCACTGACTCAAGATCTATGTCTTCCAAACTTTGCTGAACTGGAAAAGATGAATCCAGGGGTGGGATGATGGGAAACTCATTGGAAGTGTTATTAGTTTCACTGAAGAGTGCACATAAGAAGAA	AGGAATGAAATATCAAAAGCATTAGATAATTAATCAAGACATTATGAATGCATACCTGGTAAATGGACTGAGATCAAAGTGGTTTTGTTCATCAAGTATCATGAGACTGCTTAGATATTGATCATACTCCATTATATATGAAAATGAAATAACACTTGAGAAAATGCAAGATATATATATAGATAGATAATTAATAGAGA	AGATGAATCCAGGGGTGGGA	59.954	20	97.5	100	TCAGTCCATTTACCAGGTATGCA	59.478	23	100	100	164	322	485	TGAATCCAGGGGTGGGATGA	60.254	20	97.5	100	TCAGTCCATTTACCAGGTATGCA	59.478	23	100	100	161	325	485	GGGGTGGGATGATGGGAAAC	60.397	20	100	90	TCAGTCCATTTACCAGGTATGCA	59.478	23	100	100	153	333	485
PolynSSR_352	AAG	5|AHLA_contig_11924:1762-2176|+	N/A	4|TWXB_1.clean_(paired)_contig_132573:278-289|-	0.5	0.33	0.99	CTAGAAGTAATTTCCTTTGCCCTTGCCCTCGCGCTTGGTTCCAAGGCAATCTAAAATCAAAATGGTGATGAGAGGGACAAAAAAAATTCGGAATAATTGAAAGATGCTGGCGGTTTGAACTCGAAAGGGCTTTTATTTTGGCTGAGAGATGCTGTAAAAAGAAGCATCATATTATGGCATACCCCCCAGCCAACCCAATA	ATGATTCAACTGCCACGCTGAGTGCTTCGGACCCCGTGGGCGACTGATGATATTTTTTGAACTCTTCTTCCGCACTCATTCTATTACGTCCGTCCAAATTGTGGGTGTGCCGCCGGTTTTGAGTCTCTGCGCGCCATCTTTAGCTGCTGGTTTTGGCGAACAAAAAACAGGGCTGTTGTTGGTTTTCTGGGATTTGTGAA	GATGCTGGCGGTTTGAACTC	59.831	20	95	100	TCAGCGTGGCAGTTGAATCA	60.25	20	100	100	134	302	435	GATGCTGGCGGTTTGAACTC	59.831	20	95	100	ACTCAGCGTGGCAGTTGAAT	60.25	20	100	100	136	302	437	GCGGTTTGAACTCGAAAGGG	59.763	20	100	100	TCAGCGTGGCAGTTGAATCA	60.25	20	100	100	127	309	435
PolynSSR_353	AAG	5|AHLA_contig_132000:891-1305|+	8|SCEM_1.clean_(paired)_contig_107447:1319-1342|-	N/A	1.5	0.33	0.99	TGTATATAGCATCTCTGTGATATAGAAAGCCTTTTCCTTTACCAAGAAATGAGAAATTATATGAACAAAAAGAAAAATTCAGTTGCCATTTCCGATTCACATATTCCCACAATCAGGAATCATCATACCATTGCATATCATTCACAAACTAAAAATGCATTTATTCGGCAAACTGTATCTGGTTGACAGTAAACAATAAA	AGTAACCGACATACTTAAAATATTATTAAAAAAGAAAAAGAATTTCACTTACAATTTTGTTGGATCTATGTTACCAAATGCATAAGCTGCGCAACGACCAGAATAAGAGTAACCAGCATGCCTGGAGATTACGACAACCAGAAGAATAATCAAAACCAAGGATCCTAACTACTATATCAATATTGAGCAATGACTTACGG	TCGGCAAACTGTATCTGGTTGA	59.962	22	100	90.91	TCCAGGCATGCTGGTTACTC	59.747	20	100	100	177	364	540	TCGGCAAACTGTATCTGGTTGA	59.962	22	100	90.91	TCTCCAGGCATGCTGGTTAC	59.747	20	100	100	179	364	542	TCGGCAAACTGTATCTGGTTGA	59.962	22	100	90.91	CCAGGCATGCTGGTTACTCT	59.746	20	100	100	176	364	539
PolynSSR_354	AAG	5|AHLA_contig_151276:767-1181|+	5|SCEM_1.clean_(paired)_contig_8362:956-970|+	6|TWXB_1.clean_(paired)_contig_118623:952-969|+	0.47	0	1	ACTTCATTCAGTAACTTGGTCACATTGCTTGCTCCGAAGATTTTGTGCACGTTTGCAAACTTCTGTGGCTCCTCCGGTGGAAAGTATGGAGCAAAAATGCAACCTAGTATGCACTTCCTCCTTAGGAACTTGCAAGCAGCGCAGGGGGAGTTGGAAGAGCTTGAGGATGACATGATGATACAACCACTTGCTAGCTAAAC	AATGAGTTAGTTGCATGCAAGAGTAACTGAAGTTAGGGTTTTTAAAATATATACTAGCTAGAGAAGCAAGCTAAATTTTCATGTTTAGGGTTAGGGTTTTTTGAAGATTATGGTTGGAGGTTATTTCTGAAGATTTGCATCACAAGGTCAGCCAAGTTGGTTCAGAGGTGGATCTGACTCCGTTGCAGCCATTCCCATGA	TGCAAACTTCTGTGGCTCCT	59.817	20	100	100	ACTCTTGCATGCAACTAACTCA	58.256	22	100	100	186	253	438	TGCAAACTTCTGTGGCTCCT	59.817	20	100	100	TCAGTTACTCTTGCATGCAACT	58.256	22	100	90.91	192	253	444	TGCAAACTTCTGTGGCTCCT	59.817	20	100	100	ACTTCAGTTACTCTTGCATGCA	58.256	22	97.5	95.45	195	253	447
PolynSSR_355	AAG	5|AHLA_contig_28385:131-545|+	2|SCEM_1.clean_(paired)_contig_93422:1938-1943|+	2|TWXB_1.clean_(paired)_contig_12181:4200-4205|+	1.41	0	0.82	CTGCGAATCGAACACGTGTATGAGAGTTTTGACTCAGCAACAGAAGAAAAAGGACTCGGGGATATGTCTAAAAAATAATTTAAAAGTATTAGGAAGGTTAATAGTCAAAGAGATTCTTTTACTGTCAAATTTTTAGGTTTCAGTGCATTATCAACACAAACCTAGCATACCTAGAAGTAAAAAAGAAAAAAAAGGAATAA	AGTCCAAACGGATGATCCGAGTGCCATACATACCTCAAAAGACCCACCCTTTGTCTTGTTTCTAGCTTCAAAAATACGTCCATAGTATCCTATGGTATAGCCATCCCAATCAACCTTAAACGCATTTAGAATTTGAAATCTGCATCAGAGTCTATGCCACTCAACCAAAATTCAAAAATCATTCCAATAAAGTTTCAGAA	AAGGACTCGGGGATATGTCT	57.223	20	N/A	N/A	TGTATGGCACTCGGATCATCC	59.656	21	100	100	196	179	374	AAAGGACTCGGGGATATGTCT	57.952	21	N/A	N/A	TGTATGGCACTCGGATCATCC	59.656	21	100	100	197	178	374	AAAAGGACTCGGGGATATGTCT	58.615	22	N/A	N/A	TGTATGGCACTCGGATCATCC	59.656	21	100	100	198	177	374
PolynSSR_356	AAG	5|AHLA_contig_32859:4300-4714|+	4|SCEM_1.clean_(paired)_contig_131355:2413-2424|-	4|TWXB_1.clean_(paired)_contig_43060:420-431|+	0.47	0	0.99	ATACTTTTTTTACCCCAAAACTTCACGAAGTATATTGTTTTATTTACCCAATATCAGTACCAACATTAGAAATAAATAAATCAATAAAAGGGATCATTGAAATTAATTATAAATTTTTGGAAGGGCAAGAACGTGAAAAATCCCGTGCTTTATTTGAACTTTTTCATAGTGACGGAAAAAATAGAAAACAAATATATTAA	AATAAAAAAAATGCGTCTTTTATCCTTCCCATTCTCCTCTCCCTGAGATCATCGCCCTTTTGAGGGTTTTGAAGATCCAAGAAGGTAATTTCTCTCTTGTTTCCTGGAATTCTTCTACAAATTTGATGTGTTTTTCTTGGATCTGGTGAGGTATTCTTCAAATCTGTGAATTTTTTTTACCTGATGTCTTGTTTTCTTTG	TGGAAGGGCAAGAACGTGAA	59.818	20	100	100	AAGGGCGATGATCTCAGGGA	60.399	20	100	100	157	317	473	TTGGAAGGGCAAGAACGTGA	59.818	20	100	100	AAGGGCGATGATCTCAGGGA	60.399	20	100	100	158	316	473	TGGAAGGGCAAGAACGTGAA	59.818	20	100	100	GCGATGATCTCAGGGAGAGG	59.397	20	100	100	153	317	469
PolynSSR_357	AAG	5|AHLA_contig_55516:173-587|+	N/A	6|TWXB_1.clean_(paired)_contig_96485:3488-3505|+	0.5	0.33	0.97	ACTTAGCATGAAGTATGAAAAAACCAGCTAGTGTGCTCAGTTCCAGCAAAAATTTCCAGAAACGAGAGAACTGAGATAGAGAGAAGAGATTACCAGCAACTCCAACAGCACATGTCAAGGCCTCATACAATGACCAGCCATAACTCCCCATTCTTCTCAGTTCTCCCCCTTCTCTCTCAAACTCTCACTCATACACACAC	ATATGAAATAATTCCAAAAAAAGGAAAATTAAAAAAGAAAAAAGACTGAGAAAATTATATATAAAAAAAAGGACAGTGACATATACGACACGTTTTTGAAAGGAATGGATACGAGCAAAGCAGGGCCTACTGCCAACGTGGCATTAGATGTAGGCACGTGGGATTGTTTATTCTCATGTTTGCTTTGGGGGATTTAATAA	TCCCCATTCTTCTCAGTTCTCC	59.159	22	100	100	CCCTGCTTTGCTCGTATCCA	60.108	20	100	100	196	316	511	CCCCTTCTCTCTCAAACTCTCAC	60.056	23	100	100	CCCTGCTTTGCTCGTATCCA	60.108	20	100	100	175	337	511	CTCCCCATTCTTCTCAGTTCTCC	60.118	23	100	100	CCCTGCTTTGCTCGTATCCA	60.108	20	100	100	197	315	511
PolynSSR_358	AAG	5|AHLA_contig_65116:1400-1814|+	5|SCEM_1.clean_(paired)_contig_23834:1219-1233|-	3|TWXB_1.clean_(paired)_contig_78098:824-832|-	0.94	0	0.98	TCTTCATTCCAAGCACCTTCATACTATATATATACGAAGATCATAATTACACCAGTATCAATAATAAAAACCTCACCGGAACATTATTCTTAATAAATAGATGACTAACTTGATAGGAAGCGGAGGCAGTCCCAAAGACGAACCCGGCTGGAAAACTGCTCCGGTTGAGCCCGGCCACAGCTCCAACCAGCAATGCAAGC	AATAGAAGAGACCGTCCTTTATCAGCCATGCCGAACAAACTATGATACAATAAAGATGTAAGTCTCTTAACATATAGACTCTATTACATTTATAGATGGAGAGATTTTGCATTTATTGGAAGGCAGAAAAGGTTTGCAATGAACTAAAAGTATAAGGCACTCCCTGAGTAGTTTTTTCATAATTTTGCAGTTGTTTCACT	GATAGGAAGCGGAGGCAGTC	59.967	20	100	80	GTTTGTTCGGCATGGCTGAT	59.472	20	97.5	100	144	311	454	GATAGGAAGCGGAGGCAGTC	59.967	20	100	80	AGTTTGTTCGGCATGGCTGA	60.537	20	100	100	145	311	455	TGGAAAACTGCTCCGGTTGA	59.818	20	100	100	GTTTGTTCGGCATGGCTGAT	59.472	20	97.5	100	107	348	454
PolynSSR_359	AAG	5|AHLA_contig_67732:143-557|+	3|SCEM_1.clean_(paired)_contig_50955:1089-1097|+	N/A	1	0.33	0.98	TAGGATCAAATGCTAGGGTTTGCATTACGTACCTAAAAATCATGCTAGCAAAAATATACAAAACATTCCAACATAACAAACAAGACAAGATCCTTGTTAAGGCAAGCTTTTAAAACCTCTACACATGCACAAAATAAACTAGATTACCAACAACAAACAACAAGCCTCTAAACAACCACATGGCTGCACATTCAGTCCAA	GGTTACCTACGATTTAGCTGTCAAGATCCTCCTCAAGCTCCCTCTCTACTCTCCAACAAAGCTTCAAACCTTTCCAAAATCCTAGCCATAAGCAAGAGAAAATGAGGGCCGCTTATAAGAGTCCAAGTCCATGACACAACCTTGCTGCAGAGATGACTGGTGGCATGGCAATGGTGAGGGGTGGAGTAGTCTTTGGAGAG	ATGGCTGCACATTCAGTCCA	59.961	20	100	100	CACCAGTCATCTCTGCAGCA	60.037	20	100	100	198	321	518	ATGGCTGCACATTCAGTCCA	59.961	20	100	100	GCAGCAAGGTTGTGTCATGG	60.039	20	100	100	184	321	504	AAACAACCACATGGCTGCAC	59.895	20	100	100	GCAGCAAGGTTGTGTCATGG	60.039	20	100	100	194	311	504
PolynSSR_360	AAG	5|AHLA_contig_90086:3378-3792|+	5|SCEM_1.clean_(paired)_contig_52086:3805-3819|+	4|TWXB_1.clean_(paired)_contig_35177:4634-4645|+	0.47	0	0.77	TTTTTTTTTTTTTTGAAGAAAAAAAAACTAATTACTTTTTGCATGAAAAATATTGATAATGCATGCATGTCGTCATACAAATTAATAAGTCAATAATCATAACAAGAAGAAGGCGAAGAATATATGCAGATCAGATGATTAGATACCTTAATTAGAAATATATATCAGAGAATATTAATGGAACTAGAAAGAAGAAGATC	AGGCTTGATAAATGGGTGGAGGATAACAAGGAGGGAAATGGAAGGCCCTGAGCCTCAATTGAATACTTCAACTACTAGCTAGCAAGTGGTTATGAATGTATATATATACAACTCTCACAAGCAGACAAGAGCCATCCACATAAGACGGTTGGAAGAACGTATAACCCAGGGCACTGCATGGCACGCTAGGAAGGTGGCTA	TGCATGCATGTCGTCATACA	57.979	20	100	100	TCCTCCACCCATTTATCAAGCC	60.092	22	100	100	179	259	437	TGCATGCATGTCGTCATACA	57.979	20	100	100	CTCCTTGTTATCCTCCACCCA	58.803	21	100	100	189	259	447	TGCATGCATGTCGTCATACA	57.979	20	100	100	CCTCCACCCATTTATCAAGCC	58.689	21	100	100	178	259	436
PolynSSR_361	AAGA	3|AHLA_contig_10401:957-1368|+	3|SCEM_1.clean_(paired)_contig_129550:380-391|-	2|TWXB_1.clean_(paired)_contig_29392:494-501|-	0.47	0	0.91	ACAACGTTAGCACGCTCGAGAGTGAGTGGGGAATTAAAGGAAAACCACTTCGCAATCTTCTTCTTCGCAATCCTAAAGTTTTGGGTTATAATGTGGACTGCAAAGGAGATTGCATGGCGAAATGCACCCGATGCTGGGTTCGGTTTTAGTATCTCAGTCCAAGCACAGAATCATCCTCATACAATTTTATACAAGATTTC	ACAGAGGCCTGAGTTTTCCAAATCTGCACTAAGTTTGTTGCAAGTTATGATGAATTATTTAGAATTGCATGCTTTTATTTTCGTCAAACACGAAGAAATATGTCTGGCAAGAAAACCATTGCCAAGTTCTTAATCAATATGTTTATTTTTATTTGACAAAATTACAGTGCATGAACTGAATAATATGTGTTGATTTGTTG	CGATGCTGGGTTCGGTTTTAG	59.603	21	100	100	TTGGAAAACTCAGGCCTCTG	57.723	20	100	100	105	328	432	CGATGCTGGGTTCGGTTTTA	58.555	20	100	100	TTGGAAAACTCAGGCCTCTG	57.723	20	100	100	105	328	432	CAAAGGAGATTGCATGGCGAA	59.526	21	100	100	TTGGAAAACTCAGGCCTCTG	57.723	20	100	100	133	300	432
PolynSSR_362	AAGA	3|AHLA_contig_123525:1297-1708|+	6|SCEM_1.clean_(paired)_contig_141631:658-681|-	6|TWXB_1.clean_(paired)_contig_147888:255-278|-	1.41	0	1	ACATTCGTAGTCTTAGTTTCTCTATTTGAACTAATATTATTTAAGTATTTACGTTATCTTATGTGATTCCTCTTCTTAATTTTGTTTTTTAAGTTTCCACTCTCCCACTCTTTGAAACAATGTGACATGTTTTTATGTCTGTTTCTTCTACCCTTCTTTTTCACTACAACCAAACATATGATGAGCCTGATCATTTGAGG	AATGAATAATAGAAGAAAATTCTATTTTCTTTTGATGTCTGTTGAGTGCTTGTCAAAGCGCCCACTTTCTACTCATACTTAGACTTGTGGTCCTTGCTCAATGTTTCTTGTTTTATTACCTTATTTTTCACATATATATATACATATACTTGGCATCAACTACTTTCCACTTCGCTAAAGTTATGACATTTCTAATCCTT	TCCACTCTCCCACTCTTTGA	57.601	20	100	100	GAAAGTGGGCGCTTTGACAA	59.616	20	100	100	186	295	480	TCCACTCTCCCACTCTTTGA	57.601	20	100	100	AAAGTGGGCGCTTTGACAAG	59.615	20	100	100	185	295	479	AGTTTCCACTCTCCCACTCT	57.593	20	100	100	GAAAGTGGGCGCTTTGACAA	59.616	20	100	100	190	291	480
PolynSSR_363	AAGA	3|AHLA_contig_125161:546-957|+	N/A	4|TWXB_1.clean_(paired)_contig_134837:916-931|-	0.5	0.33	0.99	AAAGGATCAACAAAAACAGGAACAAAATCAGTATGAGCTTGCATCTTCTTGAGTCTTCAATCAGCTCAAGGAACAGATACTGTTTCTACTCACACTGTAGAATTACTGAAAACCAATCAGAGAACCCAAAATCAACTATAAAAAAGTAGAACAAATCAGTTCAAACATGCTGAATTCTCCTCATAGAACTTATTCCAATG	AGGAAAAACTAAGAACCTAGAGTTTTGTGAATTCAGAAAGAAGATCAATCAATTAGAGATCATGCCAACTGCAGCAGCATCACAGTTCCACCAATTCTTGAACTTTGATTCATCATCAACAGGAGCTGGAAGATTAAGATCAATCAAGTCAGGAATCACAGCATTCTGATCACCTCGGCCATCGATGCTGCTTGCAATCA	CTGAAAACCAATCAGAGAACCCA	58.856	23	100	100	GTGGAACTGTGATGCTGCTG	59.48	20	100	100	198	305	502	ACTGAAAACCAATCAGAGAACCC	58.855	23	100	100	GTGGAACTGTGATGCTGCTG	59.48	20	100	100	199	304	502	TGAAAACCAATCAGAGAACCCA	57.822	22	100	100	GTGGAACTGTGATGCTGCTG	59.48	20	100	100	197	306	502
PolynSSR_364	AAGA	3|AHLA_contig_16408:455-866|+	2|SCEM_1.clean_(paired)_contig_19391:2198-2205|+	3|TWXB_1.clean_(paired)_contig_67903:371-382|-	0.47	0	0.98	AAATGACTACTTAAAAATTCTAGTATTTCGTTTTAGCCAAATGTTCCACATTAAGAACCGGGTAATTAAATCTCCAATGTATTTAACGTGCTTAGGAAGATGAGGCCTTCGTACGCTCCACAGATCAGAACTTGTGTGTGGTGCCAGAGGTAAGTGTAAAGTAGCGGTTAGGAAATTCCAAATGTATCACACAGAAAGGC	TGTGATCGATAGACTTTTCTTTCACCCAGCACATGACACATGTAGCAAATGAAAGTCTGTTGCATTGTCTCGCTGCCAGTTTGTCTAAAGTAAGAATGCTGTGATCCCAAGCTAAACAATTTAAAATACCGATTTTTTTAGGGCATGAACTCTTCTAGATTAGATTTGTGTTCTTACATAATAACCCTCCATGTCTGAGA	AACTTGTGTGTGGTGCCAGA	60.035	20	95	100	ACATGTGTCATGTGCTGGGT	59.889	20	100	90	127	328	454	AGAACTTGTGTGTGGTGCCA	60.035	20	100	85	ACATGTGTCATGTGCTGGGT	59.889	20	100	90	129	326	454	AACTTGTGTGTGGTGCCAGA	60.035	20	95	100	TGTGTCATGTGCTGGGTGAA	59.818	20	97.5	100	124	328	451
PolynSSR_365	AAGA	3|AHLA_contig_25417:4950-5361|+	3|SCEM_1.clean_(paired)_contig_27159:1877-1888|+	2|TWXB_1.clean_(paired)_contig_88406:1011-1018|-	0.47	0	0.99	TATACGATGCCATTTAAGAGAATCATAAAATATTTCAAGTTCAATCAACAAGTGGAATCAGTATGACATGCACCTGTCAGGCTTTGTAAAGACTGCTCCAGTTCCCAGCAAGCCATCACAGCTTCCATAGCATGAACACGGACATGTTGTTGCAGTTGTTCTTTGAAAGAACAGAGTAACAAGACATAGTGTGTCTAAGC	GGAATTATCATGATCAATGCAATAAATTATAAACAGTGGAAATCTTTTACCACAGAAGAGGATGGATAAACAGAGGCACATAATTAAGCATTCAAACCCGAACCTTCTATTCATGATGAAACAAAAGTCTGCTCCAAGTTAACTCGTGCTTGTTATGTCAAATCAACTATTCATGCATTTTTTGTCATTGAACATGGTAA	CACGGACATGTTGTTGCAGT	59.337	20	100	100	GAAGGTTCGGGTTTGAATGCT	59.113	21	100	90.48	183	336	518	CACGGACATGTTGTTGCAGT	59.337	20	100	100	AGAAGGTTCGGGTTTGAATGC	59.113	21	97.6	100	184	336	519	ACACGGACATGTTGTTGCAG	59.337	20	97.5	100	GAAGGTTCGGGTTTGAATGCT	59.113	21	100	90.48	184	335	518
PolynSSR_366	AAGA	3|AHLA_contig_31622:369-780|+	3|SCEM_1.clean_(paired)_contig_71207:2381-2392|-	2|TWXB_1.clean_(paired)_contig_4059:2343-2350|-	0.47	0	0.99	GAATTTCTTTAGTTAGAGTTGACTCTGCATTTCTAGATTTAGTATTTCAACTTAAATCCAAATTGTATGTCAACTGTCAAGAGTGAAAAAGAAAAAAAGTTTCGGATAAAATCATGCTTATCAATTGATGACAAATTATGCATTAAGTTTCCAAATTAATGAACACAGAGACACAATCATGAATCCCTCAATAAGCAACT	AACAAAGCCTTTATTAGATCACTCAAATGAAAACAAATCAAGGAATCTAAAAAACATTGACTCCAATACATACTCTGGACCAGTTCTAATGTTCTATTGAGTTTTTCTGCATAAACTCCATGAAGACATAGTGCATCAGGCCCCTATGCAAAACACTAGAAGAAGTAGGCTCCATGGCTTCCAATCATCTTGAAAGCTAC	ACAGAGACACAATCATGAATCCCT	59.773	24	100	100	GGGCCTGATGCACTATGTCT	59.528	20	97.5	100	191	364	554	ACAGAGACACAATCATGAATCCCT	59.773	24	100	100	GGGGCCTGATGCACTATGTC	60.536	20	97.5	100	192	364	555	CACAGAGACACAATCATGAATCCC	59.665	24	100	100	GGGCCTGATGCACTATGTCT	59.528	20	97.5	100	192	363	554
PolynSSR_367	AAGA	3|AHLA_contig_68313:1700-2111|+	N/A	2|TWXB_1.clean_(paired)_contig_166790:425-432|+	0.5	0.33	0.96	TCAATGATAAATATAAACCTTGCTTTGATGTACACCATAGAAGAAGGATTAAAAACAAAAGTCATTGACAATATTGACAACATAATCCACGAGAAATTTACTCTAATTATTGGACTTCCATAACAAAAAATTTAAAAAATGTGCTCACCTACAAGATATAAAGCAAAATCTATTCTTTTACATGGGAAGAGCTTTGCACC	AAAACAAAACACATATAGTATCAGAGGGACCAAGTTACCATTACATATCAGAAAACGAGGAATCAAGCAATTAACAAACGTGAAATAGATTAAATAGTGGAATCGTCATCACAACTTGAGATACCATCATATTTATTCACAGAAAGCTCCCTAACAAAGAAATAAAGAAGCACCCTTCAGTAATCAAATAAAAAGAATAG	ATGGGAAGAGCTTTGCACCA	59.887	20	100	100	AGTTGTGATGACGATTCCACT	57.315	21	95.2	100	147	381	527	ATGGGAAGAGCTTTGCACCA	59.887	20	100	100	TGCTTGATTCCTCGTTTTCTGA	58.261	22	95.5	100	100	381	480	ATGGGAAGAGCTTTGCACCA	59.887	20	100	100	TCAAGTTGTGATGACGATTCCAC	59.254	23	95.7	100	150	381	530
PolynSSR_368	AAGA	3|AHLA_contig_80260:308-719|+	2|SCEM_1.clean_(paired)_contig_73048:1388-1395|+	3|TWXB_1.clean_(paired)_contig_93606:1631-1642|-	0.47	0	0.98	CAAGTAGGCAACAACGAATCCTTATAGGCTGAATCTTTCGCATTCTTTAAATCTCATGTTAATGGTACTTGGTATGAGTTTTGGAAGATTAAGATGATGATTTTGTTCTCATCACATTGGGATCTTGTTGAGAATGGTGATGCAGACATAGGTGACTTAACCAATCTTAGTGCTTATCAACAAGCAGAATTAATGGAGAC	TTCAAAGGCATTATTGGTGATACAGGAAGCTGCTCATGATTCCATATTTCCTAGAATTTGCGACACTACAACATCGAATGAAGCATGGACCATTATGAAGATTGGTTATTAAGGATCTAACAAGGTGATAACTATTTTACTTCAAGCCCTTGTTCTTTTCAGAATCTTTTTGTAAAAAATTCAGAATCTGTACCAAGAGT	TGGTGATGCAGACATAGGTGAC	60.093	22	100	100	GAGCAGCTTCCTGTATCACCA	59.792	21	100	100	113	334	446	TGGTGATGCAGACATAGGTGAC	60.093	22	100	100	TGAGCAGCTTCCTGTATCACC	59.792	21	100	100	114	334	447	TGGTGATGCAGACATAGGTGAC	60.093	22	100	100	AGCAGCTTCCTGTATCACCA	58.721	20	100	100	112	334	445
PolynSSR_369	AAGA	3|AHLA_contig_87252:198-609|+	N/A	2|TWXB_1.clean_(paired)_contig_82835:197-204|+	0.5	0.33	0.97	ATGGCTTAATAATGAACATTAAATAAGAAGCAAGGTTTGGTCTTGTGCTAAAAAAAGGCATTAAAAGCAAGGGAAAAAAGGTGGGTAGAGTGAGTGACATGTGATGTTGAATGTAGAGCATGAAATTACCAAAGTACCAAAAGATCATGAAGTTTATAGGTTGCAGAAGCTAAGTTGATGGCTGTTTCCAAATTAAGGCC	GTAGAATTCATTGAAGTCACAACTTGTGTTTCACTTTTCTCTTGTCGGCAGAGTGATCAAAGGTCCGTGATGTGTGTCCCACCACCTTTGACACAGTCTTCGCTCAATTTGCTCAAATGTGTTTTTTTGTTTCCTCGAGTCATAAAGCAGACATAATTGTTTCTTTTCTCAATTAAAATCTTAATATATATAACCATTTT	TGCAGAAGCTAAGTTGATGGC	58.913	21	100	95.24	GGACACACATCACGGACCTT	59.965	20	100	100	130	358	487	TGCAGAAGCTAAGTTGATGGC	58.913	21	100	95.24	GTGTCAAAGGTGGTGGGACA	60.107	20	100	100	145	358	502	TGCAGAAGCTAAGTTGATGGC	58.913	21	100	95.24	CTGTGTCAAAGGTGGTGGGA	59.817	20	100	100	147	358	504
PolynSSR_370	AAGA	4|AHLA_contig_40002:1874-2289|+	2|SCEM_1.clean_(paired)_contig_92337:1730-1737|-	N/A	1	0.33	0.96	CCAATCAAAGATTTAAAAGATTTTGTTATTCTGTGTGGAAAAGGAACGTAGTTTACAGGCAAGAAACCTTACAGGATACCACTCTCCGGTGCCTGGATCAGGACGGTCCCTACCACCACTTGGAGCAATCCATATTATATTAGATCCAGTTCTATATGCAGAGAAAATCCATGTCAGATGAAAAAAAAGGAAAGAAAAGC	AAAGAAAAGGAACAAGCATTTAGAACAATCAATATACAAGAAATCAACCAAAGTAAGTGTCCTGCCCAATAAGTTGTATAATGCTAGATATGTGTAATAGGTTTCCTGAGCAGCTTTTCTCAGTGACATGAATGTCAACTTTCTCTCTCTTAAATTTTCTCTCCCTTTTTCAAAAAAAAAAAAAAACCGTTTCTCTACCT	CTGGATCAGGACGGTCCCTA	60.106	20	100	100	TGGGCAGGACACTTACTTTGG	60.203	21	95.2	100	192	292	483	CTGGATCAGGACGGTCCCTA	60.106	20	100	100	GGGCAGGACACTTACTTTGGT	60.203	21	95.2	100	191	292	482	TGGATCAGGACGGTCCCTAC	60.397	20	100	100	TGGGCAGGACACTTACTTTGG	60.203	21	95.2	100	191	293	483
PolynSSR_371	AAGA	5|AHLA_contig_28912:937-1356|+	4|SCEM_1.clean_(paired)_contig_30372:1122-1137|+	4|TWXB_1.clean_(paired)_contig_10154:1533-1548|+	0.47	0	0.99	AAAGGGTATCAGAATGATTTCAATAAGCCAAGCATCATGAGATTCAATTACATAATTAACAAAATTCAAGGCAGTAAACATTTAATTGAAACTAAACAAAAGAATTCATTTAGCCACATGCTATAGTTTAGCCACTACCACATAATTACAAATGCTCTAAAAACACAACCTTCTAGTATACAAACAAGATATAACTAGAT	CGCAATCCTATGCATTATTAAAAACATATAATGAACAAATGGCAAAACTATTCCACATAAAAAACTAGAACATATCTCAATAAATTTAACAAGAAAAATGAATTATATATAGATATTGAATGCCAAATTCATATGTATATACACAAAAAATACTTGCAAACATCTTGTTACGCTAAATAAAATACATTCAATTGAATAAC	Primers not available
PolynSSR_372	AAGAAC	3|AHLA_contig_17980:668-1085|+	2|SCEM_1.clean_(paired)_contig_35948:1804-1815|-	N/A	0.5	0.33	0.98	AAACAGAACCCCAATGAACCAAGAAAAAAACAAATTATTTGCTCCAAAACAAGAAACAAAAGAAGAAAAAGAAGGCATTTCATGCCTCAAATCTTCTCACAAAACAAAGTGCTGTTGTTCATTGAGAAAACCATCATCAAAGTTCTGAGAATAACCCTCTGGATCATACCCAAACCTAACACCCCCACTCTGCTTCAAAG	AAGACTTCAATGCTTGTTTCCACTGAGACTTAACCTTGAAAACAACTTGTTTAATTGAGAGCAATGAAGAGCACATGAACCCTTTCTTCTCCTCAACAACAAGCAATGATCTCTTTGCCCAACTTATTGCATGAATCCTCTTCTTGTTTCCCATCATACAAAGAAGAGAAGCCATCTTGATGATCTGATCTGATCTCTTT	CCCTCTGGATCATACCCAAACC	60.159	22	100	100	GGGTTCATGTGCTCTTCATTGC	60.416	22	100	100	146	354	499	CCCTCTGGATCATACCCAAACC	60.159	22	100	100	GGAGAAGAAAGGGTTCATGTGC	59.51	22	100	100	156	354	509	CCCTCTGGATCATACCCAAACC	60.159	22	100	100	GGTTCATGTGCTCTTCATTGCT	59.509	22	100	100	145	354	498
PolynSSR_373	AAGC	3|AHLA_contig_12910:2908-3319|+	3|SCEM_1.clean_(paired)_contig_82509:1054-1065|+	2|TWXB_1.clean_(paired)_contig_60232:618-625|-	0.47	0	0.98	TTTGAGATTTTTGGACACTGTTGACACAGATATGAGAAATCTGGCAATGAGCAATTTGTGACTGAAATCAGCAAATGGGTCTTCCATGAAAGGGGCCATCTTAAGGTGAAACAACTCCATATGATATTGTGGTATTTATGATTTTTATGTCAATTCCTCTTTGCCCGACGTCTGATCCGATTTTTATGGTCTGTTGCTAA	TAAACTTGGTCATGTGAACAATAATTTGGGTTAATGATGTGCCTTATATTCTTCTAGGCTGTAAATGTCAAGCATAACAAAGTTGAAGAAACAAGTGAGCCTGCAATGTACCGAATCAATGATGATCTGGTACCTTTTGCCTATTCCCTTTACCACCAGATGTAATTTATTTCATTAGAAAGCATACTAATCTTCTCCTT	AATTCCTCTTTGCCCGACGT	59.964	20	100	90	TTCGGTACATTGCAGGCTCA	59.677	20	100	100	176	351	526	CCCGACGTCTGATCCGATTT	59.898	20	N/A	N/A	TTCGGTACATTGCAGGCTCA	59.677	20	100	100	164	363	526	AATTCCTCTTTGCCCGACGT	59.964	20	100	90	TCGGTACATTGCAGGCTCAC	60.391	20	100	95	175	351	525
PolynSSR_374	AAGC	4|AHLA_contig_50561:938-1353|+	6|SCEM_1.clean_(paired)_contig_97945:998-1021|+	N/A	1	0.33	1	AATAATAAAAAAAAGCCACAAGGTTGGACAAACCTCCAGTTGATTAATGTTGCCATCAAAGTCTATTCCCAAGTTGTACAATATGGGATTTAGTGAGGCCAGCTTCATGGACAGAAACTGTTTATATTTCAACAAAGCTTTCATGAGAACAGAAATGTGGATGGATGCAGAGGTTAAGTGAACCATTACTGTAGATACAA	AATTAAAAGTCAGGAAGCCAGCCAACCTCAACTTGATTCTGCAAGGACTGTACATAGTTGATGATCTCATCCAGCATTAGAGCTTTCCCAGTCACCTTTTTTCACCAAGACATCAACAAATTAAACTACAATCAGAGTATGAAGAAGAAGAAGATCTCATTCTAAATGTAGATTATAAACAAATGAGGAGCCTCACCTTG	TAGTGAGGCCAGCTTCATGG	59.457	20	100	100	AAGTTGAGGTTGGCTGGCTT	60.106	20	100	100	160	290	449	GGGATTTAGTGAGGCCAGCT	59.451	20	100	100	AAGTTGAGGTTGGCTGGCTT	60.106	20	100	100	166	284	449	TAGTGAGGCCAGCTTCATGG	59.457	20	100	100	TGGCTGGCTTCCTGACTTTT	59.814	20	100	100	150	290	439
PolynSSR_375	AAGCA	4|AHLA_contig_54509:2649-3068|+	N/A	5|TWXB_1.clean_(paired)_contig_117481:982-1006|+	0.5	0.33	0.96	CAACAAACTCACAGGAAGAGAAAGAAGAAACAAGTAGATGAGAAAGGGAGGAGGGGACCGGTCAAACAGTGATTTCCGTTAATACGGCACAGTTACCAAGCGTGCACCATCTCAAAAGCCTGACTTTTCATTGCCTTAACTTGATAAAACTCTCCAGCTCTTCAGATCTATCTTAACAAAAACAGCAAGTGTAATCAAGC	AAGCGAAGAAACACAGAAGATAAAAAAGAAAGGATTGGATCAAAGATCAAGACAAAGACTGTCTCCACGCGTATTAACCTCTGGTTCTCCACAAATGGTGCTCCTCCATGACCTTTCCCATCAGTTGTTGCTTTATACCTTTCATCTTTGACAACATATATAGATAAAAACACATCCACATACACATACACACAAAAAGA	TTACCAAGCGTGCACCATCT	59.964	20	100	100	CGCGTGGAGACAGTCTTTGT	60.598	20	100	100	199	292	490	TTACCAAGCGTGCACCATCT	59.964	20	100	100	ACGCGTGGAGACAGTCTTTG	60.598	20	100	100	200	292	491	CGTGCACCATCTCAAAAGCC	60.11	20	100	100	CGCGTGGAGACAGTCTTTGT	60.598	20	100	100	191	300	490
PolynSSR_376	AAGG	3|AHLA_contig_24471:1089-1500|+	2|SCEM_1.clean_(paired)_contig_63640:999-1006|+	3|TWXB_1.clean_(paired)_contig_107196:1884-1895|+	0.47	0	0.99	AGCTATAAGCTTCACCGTGAGAATGCTCCCATGGCTTGTTTCTATATAATAATAAGCAGTTCTATGGAAGTTCTTCTAAAATGGCATCAGGCTAGAGTTCATGCCAGAATGGCCAGTGCTGAAACTAATGTTCTAGAATCAATTGCTCTGCACTAAAAAAACAAAAAAATTGATTTAAAAGCATGCACACAGAGAGAACA	GAAGGCACAGGTCTGTAGATCATTACCTGGTCAAGAAAGAGTACCCAATCAGGAGAGAGGTTATAATATGATGAGCCATCATGATGCCAAAATCTTTCCTTCGAGTTTCCCATATAAGCAAAGCCCCGATGCTATAGAGATAAAATCCACACTGACACATGTAGAAAAGCTTCATGGAAACCCTAGCCAGGAGTATGAGT	AGCATGCACACAGAGAGAACA	59.929	21	100	100	AGCATCGGGGCTTTGCTTAT	60.107	20	100	100	166	379	544	AGCATGCACACAGAGAGAACA	59.929	21	100	100	ATAGCATCGGGGCTTTGCTT	60.107	20	100	100	168	379	546	AGCATGCACACAGAGAGAACA	59.929	21	100	100	TAGCATCGGGGCTTTGCTTA	59.456	20	100	100	167	379	545
PolynSSR_377	AAGG	5|AHLA_contig_30811:1037-1456|+	N/A	3|TWXB_1.clean_(paired)_contig_177302:1592-1603|+	1	0.33	1	CTCCATGCCTCTGTAGTACACTATATCTACATTGCACGCTATATACACCACCCCATTCCCTTGCATGGGGACATCCCAACAATGAAGGTCCCCCCTCCTGCTTGTGCAGCAATCTCTGAGCTACAAGCCTATAAGACGACTTTGGTATATTGCTAACCTTGTTATATATAATAGTTGTGTCATATAATAGTAAAAGAATT	GAGAGTGAATGCACAAATGAGCAAATGCGCAGGCGCAGCAGCAGAGCACTCTCACGTGATCTCCATGAACAACCGCTATCTTTAAAAGAAGAGGAACAAAGCACAGAGCAGGCGAACAAGAAAAGCCCAGACATCCAGGTACTCTGGAAAACTAGTGTTGTGGTCCTGCCCTGCCGACTGGTAACCATCGTCTTGTCAGG	TGTGCAGCAATCTCTGAGCT	59.676	20	100	100	GCGCATTTGCTCATTTGTGC	59.906	20	100	100	148	302	449	TGTGCAGCAATCTCTGAGCT	59.676	20	100	100	ATCACGTGAGAGTGCTCTGC	60.109	20	100	100	178	302	479	TGTGCAGCAATCTCTGAGCT	59.676	20	100	100	TGGAGATCACGTGAGAGTGC	59.472	20	100	100	183	302	484
PolynSSR_378	AAGGAC	4|AHLA_contig_32772:1119-1542|+	3|SCEM_1.clean_(paired)_contig_11672:4059-4076|-	3|TWXB_1.clean_(paired)_contig_34726:1599-1616|+	0.47	0	0.99	AGAGGCAGGCCAGGTTGGAAAAGGAAATGCTGGAACAAGAGGAGAGAAAGCAGAGGGAAGAGGTTGCGCGATTGGTGGAAGAAAGAAGGAAGTTGAGGGATGAGATTTTGGAAGCTGAGAGAATTCATTCGAGGGGCCCCGGGTATGATGGGGATAGAGAGAAGAGAAAGGAGTCTGACAAGAAGAGGCAAGAAAGAAGA	AAAGGCTCGAGTAAAAGCAACTCTGATGTCGAGGAATGTGAGAGGAGAGCTAGTAGAGAGAATGAGAAGAAGCATGAGTTTGATAAGAAGAGTGAGAATGAAAGGAAGGAGACGACAAAAACAATGACAGACAAATATAAACTACAGGCATTGGATGCTGGAATTGCGACAAAAGCAGCGACAGGAAGCAGACATAAGTA	GCGCGATTGGTGGAAGAAAG	60.179	20	100	100	TCCTCGACATCAGAGTTGCT	58.45	20	100	100	194	265	458	GCGCGATTGGTGGAAGAAAG	60.179	20	100	100	TCCTCGACATCAGAGTTGCTT	59.104	21	100	100	194	265	458	GCGCGATTGGTGGAAGAAAG	60.179	20	100	100	TTCCTCGACATCAGAGTTGCT	59.104	21	100	100	195	265	459
PolynSSR_379	AAGGAG	4|AHLA_contig_35227:1984-2407|+	3|SCEM_1.clean_(paired)_contig_142747:497-514|-	N/A	0.5	0.33	0.98	TCAAAAGACTCACTCCCGGTTCTCATTGGCAAAACCCGAAGCTTTGACAACGAATGATCGCCGGATCAAACTAACAGAGGGATTCCGCGTAGCGGTGCAAGGCCACTTGGAGTGGAGAGGAGACGACAACGGTTGCATCCGGAGCGAGATCGCCGTGATCAGCCTCGAGACTGGATTAGGGTTTCAGAAGATCAGGGCAC	GAGAGAAGAAGGATGAACCTGAAGACATGAGAGAATATATATAGAAAGAGATCTGGGACTTTGTTTATTGATGGACTGTGGATGGACGCTGGCTCTTGTTCCAAGCCAAAGGTCATGGCCGCTGAGCTTTTTTGGAAGGGGAGGGAGAAGGTGAGTGTAAGATGGCATGAGCAAACCGCGAGTCATCGTACCGCTTTATG	TGATCAGCCTCGAGACTGGA	60.034	20	100	100	CGTCCATCCACAGTCCATCA	59.463	20	100	100	157	355	511	GTGATCAGCCTCGAGACTGG	59.898	20	100	95	CGTCCATCCACAGTCCATCA	59.463	20	100	100	158	354	511	TGATCAGCCTCGAGACTGGA	60.034	20	100	100	AACAAGAGCCAGCGTCCATC	60.675	20	100	100	169	355	523
PolynSSR_380	AAGT	3|AHLA_contig_91497:732-1143|+	N/A	2|TWXB_1.clean_(paired)_contig_126973:619-626|-	0.5	0.33	0.98	CTAATACCATTTTGTTGAGGGGAATGAGGAGTTGTGAACTCTCTCTTGATTCCTAACTTATCAAAAAAGTCTTTGAACTCATTAGACATGAATTCTCCTCCTCGATCAGTCCTCAAAGTATTCGGTTTGCTACCTATATACTCTCCACCATTCCTTGGAACCTCTTGAAGCATATGAAAGCATCAAACTTACACTTGAGG	CCATAACATGTAGTTGTAGTCATTAATGAGTACCAAAAAATACTTGCTGCCTCCCAACGATTTACTCTTCATAGGACCATGTACATAGATCAATATGAATTAGTTGTATTTTTCTATATCGCTCTCCATGTAATTCTAGCAAAGAAAGAGGTTTTGACTTGTTTCCCATATATACATGCTTCACACTACTTAAATTGTTT	TCCTCCTCGATCAGTCCTCA	59.08	20	100	100	TAAATCGTTGGGAGGCAGCA	59.673	20	100	100	181	295	475	TCCTCCTCGATCAGTCCTCA	59.08	20	100	100	CGTTGGGAGGCAGCAAGTAT	60.393	20	100	100	176	295	470	TCCTCCTCGATCAGTCCTCA	59.08	20	100	100	AAATCGTTGGGAGGCAGCAA	60.539	20	100	100	180	295	474
PolynSSR_381	AAGTA	3|AHLA_contig_39197:1601-2015|+	2|SCEM_1.clean_(paired)_contig_51877:2319-2328|-	N/A	0.5	0.33	0.98	AGTCATCCATTTCAATTACTACAAGTCCCAAAATCTACACCATTGAAAACCATCTAGAAGGTTTTTTTTTAAATTAAAATTTTCCTACATGTTTACTTTCAAGCCTTGCTTTGATGGAGTGTGGCAAGCGTTTATAAAGTAAAGGAAGGGAAGGTAACATAAGATAACAGAAGAATTCAACCCATTCTTTGTTTGGGGGG	AGGGTTCCAATTCTTTTGTGTTTGGTTTGAGGGTAAAAGAAGGTAAAGTACTGTACTAATATTAATAAAATACCCTTCTAGTCTCAAATATTACATGATGAAGTTTATGCTTGAAAATATCAATACAAAAAAAATAGCTACTTGAATTATTTTTTTTACATTTTTTCACACAATTATCTAAAAAAATTCAATAAAATGGA	TGCTTTGATGGAGTGTGGCA	60.179	20	100	90	ACCCTCAAACCAAACACAAA	55.877	20	100	80	143	306	448	TGGAGTGTGGCAAGCGTTTA	60.179	20	100	100	ACCCTCAAACCAAACACAAA	55.877	20	100	80	135	314	448	TGCTTTGATGGAGTGTGGCA	60.179	20	100	90	ACCCTCAAACCAAACACAAAAG	57.799	22	100	81.82	143	306	448
PolynSSR_382	AAGTA	5|AHLA_contig_139137:137-561|+	5|SCEM_1.clean_(paired)_contig_106603:304-328|-	4|TWXB_1.clean_(paired)_contig_54215:876-895|+	0.47	0	0.99	GTTGTTGTTATCGCCAACAATGTTGTCTTCACTCTTGCGTTTCATTATGTTCAAACGAAACAAGAAACAAGAGGCTCAGGTGTAACCCTTTCTATTGGAGATAAACACTAAGGACTTGCTTGGATAGAGTGTGGCAAGGGTTCATAAAGTAAGAGAAAGGAAGGTAAAGGAAGCTAGTAATCCATCGCTTGCTTGGGAGG	AAGTGAGGGTTCCCATTGTTTTGTTTTTGGTTTGTAGCTAAAAAAAAAGTAAAGTAATGTACTAATATTACTAAAATACCCTTATAGTTTCAAATATTATTTGATGAAGCTTATGCTTGAAAATATCAATAAATACACAATAAAATAGGCACTTAAATTATTTTTTTTACTTTTCTTTACATCATCATTTAAAAAATTTG	Primers not available
PolynSSR_383	AAGTCA	5|AHLA_contig_40986:77-506|+	3|SCEM_1.clean_(paired)_contig_71697:1573-1590|-	N/A	1	0.33	0.98	GAGCTACTCGAGCTCGAGCTCGACTCAACCATGATCTAGTCAAGTTTGAATTTTTCCCGAATTGATCTTGAGTAACTTATAAGTAGTAGTGTATCAGGTACATCCTTACAATGGAGTCAACAGGTAAATAAACAAGCCTATGTCTCTTATAGCGTCCCATTGGCTATTACAAAAAGAGAAAGCAGTCAAAGTAAAGACAT	GGAACAATGAAGAAGACGGCAAACAACGAAACCCAACCGAAAGTCCCCCTCCTCATCCTCATGCCTAATGATCCCCCTCCAGTGCTTGTTATTCCTCTGCTCTTTTTATTCCCCTCATTATTCCCCCATGCACTCCATCCATCCTCTAACTTCTTCCTCTTTCTTTTCATTTCAACAACTTCATTCATTAATAATTAATT	AGCGTCCCATTGGCTATTACA	59.511	21	95.2	100	GGTTTCGTTGTTTGCCGTCT	59.621	20	100	100	113	226	338	AGCGTCCCATTGGCTATTACA	59.511	21	95.2	100	GGGGACTTTCGGTTGGGTTT	60.469	20	100	100	128	226	353	AGCGTCCCATTGGCTATTACA	59.511	21	95.2	100	GGACTTTCGGTTGGGTTTCG	59.41	20	100	100	126	226	351
PolynSSR_384	AAT	4|AHLA_contig_101206:893-1304|+	2|SCEM_1.clean_(paired)_contig_31928:1502-1507|-	2|TWXB_1.clean_(paired)_contig_124150:2830-2835|-	0.94	0	0.88	AGGGTAAGCCTCATCTTTTAAAGTTCAGGGATCCTTTTTTTAATATTATTTTTGGTCTAATTATAATACAACTTTGGTAGAGCAATAACTTAAGCTACATGCTCTTGTTCAATACTCCTAATCAAACGTTGCTTTGCCAATTTGATGGTTACTGCTAGATGATCATTTTCATGTTCTTAAAATCCTAAAACAGGTGTAAA	GAATTAATTATCGATTAAAAAACAACAGAATATTCAAGCGCATGACAACAGTTTCTTGCTCACCTTTACACCGCATTTACTATGGGTTAACCACAAAGGCTGAAAAGGAGTGCCAATTAATACTTTATATATGCATGATGAAGTGAACATTGTATGACGCCAGTTTAACTATTTATGCCATAAGTGAACTTGTGTATATG	CGTTGCTTTGCCAATTTGATGG	59.842	22	97.5	95.45	ATGCGGTGTAAAGGTGAGCA	59.964	20	97.5	100	162	326	487	CGTTGCTTTGCCAATTTGATGG	59.842	22	97.5	95.45	TGCGGTGTAAAGGTGAGCAA	60.179	20	97.5	100	161	326	486	ACGTTGCTTTGCCAATTTGA	57.407	20	100	100	ATGCGGTGTAAAGGTGAGCA	59.964	20	97.5	100	163	325	487
PolynSSR_385	AAT	4|AHLA_contig_101646:539-950|+	2|SCEM_1.clean_(paired)_contig_108980:233-238|+	N/A	1	0.33	0.72	AGAACCAGTGTGAAAATAAATAAGTTACATGAATTTTTTCTCAATTAGTTCCTTCAATACCTCAAGTTTCTGAATGATCTTGGGATTCATCAGGTCTCTGGCCTCCCTCACTAGTGTACCTTCTCTACTGAAATGGTATGCATCCACCACTGTCCTTATCCAGGTATGCAATTGCTCTGGAGTGCTGCAAAATAAGAAAA	ATATAAAACATACACCAAAATTTAAACCAGAAATTAAAGGAAATTAAAATTTACATGTGATTTCAGAAATGCTTACGTGTATAAACAATCAACATCCTTGCCCTCCAGTTCATCCCCTGGAGTGAATGCATCTGTGAGAACACTCAACTTTTCCTCCGGATCTTCAATTGTGAGGAGATATTTCAATATTCTGATTTCTT	GCAATTGCTCTGGAGTGCTG	59.829	20	100	80	ACTGGAGGGCAAGGATGTTG	59.961	20	100	100	154	367	520	ATTGCTCTGGAGTGCTGCAA	60.251	20	95	100	ACTGGAGGGCAAGGATGTTG	59.961	20	100	100	151	370	520	AATTGCTCTGGAGTGCTGCA	60.251	20	95	100	ACTGGAGGGCAAGGATGTTG	59.961	20	100	100	152	369	520
PolynSSR_386	AAT	4|AHLA_contig_105177:961-1372|+	N/A	5|TWXB_1.clean_(paired)_contig_12699:4919-4933|-	0.5	0.33	0.99	AATACACACACAAAACAATAAAAATAAATCTACCAAGCAAAGGCGAAGCATTAAAGTGGCATTAGGCAATGCGAAGTAAGTATGCTAAGAATGACCGCCAACCTCAAAATTTTTTTCAATCTATCACAAATAAGGTTCGGTTCTATATTTCCATATTCCGATCTTAAGAACTTGCAAAATAAATTTTTTTATGTATTAAC	AAATATTTTAAAGGAGTATTAGTATTCATATTGCATCGGCATAAACAAGTAAATAGATGATAATAACAAGCCTCCAAAGTAAGCAGATTTGATCAGACAAAGGTCTCACCTATTTGTGAACGCTGGCCTTGTCACCAATAATCTCTGCATGAACATGCGCCATCTTTGAAGTGATGAAATCTACTAGAGTCCCTCACCAC	GCTAAGAATGACCGCCAACC	59.267	20	100	90	TTACTTGTTTATGCCGATGC	54.385	20	100	90	181	283	463	TCCGATCTTAAGAACTTGCA	54.41	20	100	100	GCCAGCGTTCACAAATAGGT	58.835	20	100	100	183	356	538	GAATGACCGCCAACCTCAAA	58.756	20	100	100	TTACTTGTTTATGCCGATGC	54.385	20	100	90	176	288	463
PolynSSR_387	AAT	4|AHLA_contig_116345:128-539|+	3|SCEM_1.clean_(paired)_contig_91743:218-226|+	N/A	0.5	0.33	0.99	ATATTGATCGTTATAAACTAACACCATCAACAATTGAAATACTGTAGTTAGAGAACAACTCATTTTTCGGGATTATTCTTGATTGTTGGAACAAATCTCTACACACAAAACTTACGATTGTGGATCTTTCTTATAATAGTTTGAGCCCCGATTTTCCAAGAACAATTTGCAAGGGCTATTCATTGGATATATTACACTTG	TTGTCCAGGGAGCTTCCTTTACAGTTGAGAAATTGTCAATCTTTGGGAATACTTGATCTTGGTTATAATAAGTTCAATGGAAACATATCTACTTTGCTTTGGAATGACTAACTACATTTAGAAGCTCTTCGACATCGATCCAATTTATTAATTGGCATCATTCCTCCACGGCTAGGTGGCTTCAATTTTCTTCGAGTTAT	TGAGCCCCGATTTTCCAAGA	59.304	20	100	100	CTCAACTGTAAAGGAAGCTCCCT	59.992	23	100	100	100	268	367	TAGTTTGAGCCCCGATTTTCCA	59.959	22	100	100	CTGTAAAGGAAGCTCCCTGGA	59.091	21	100	100	100	263	362	AGTTTGAGCCCCGATTTTCCA	60.203	21	100	100	ACTGTAAAGGAAGCTCCCTGGA	60.764	22	100	100	100	264	363
PolynSSR_388	AAT	4|AHLA_contig_117478:266-677|+	3|SCEM_1.clean_(paired)_contig_112124:535-543|-	N/A	0.5	0.33	0.97	ACCAAGGAGAAGCCATGGGGGTGCTCGGGCACTGGTGGTTTGTGAATGCGTGTATATACACTAAAAAAAATTTTATTTTTAAGGGTGTTTTCTGCATATTATATATAGTTTTAAAAAAATTACAATAGAATGAAAATTGAGTTAATTATTTTTATTTTAATATCAACAATTAAAATCAGATCTTTATTTTTTTTTAAAAA	AAGACTTAACATGCCATGAGATAAATCTAATACTAACTCCAAACTAGCAATGCCAGGCATTTTTTCCCAAAAAAAATAACTTCGCCAGTAATGATGAGTGAAATGGCAAAATTTAAGATGTATGCATCTTCAGTGTGTATTCACTGTGCATACACACATCCACAAAGGCCACAACAATCCTAGAATTTTTCATAAAAATC	GTGGTTTGTGAATGCGTGTA	56.951	20	100	100	TCTCATGGCATGTTAAGTCT	54.047	20	95	100	199	234	432	GTGGTTTGTGAATGCGTGTAT	57.447	21	100	100	TCTCATGGCATGTTAAGTCT	54.047	20	95	100	199	234	432	GTGGTTTGTGAATGCGTGT	57.063	19	100	100	TCTCATGGCATGTTAAGTCT	54.047	20	95	100	199	234	432
PolynSSR_389	AAT	4|AHLA_contig_121495:709-1120|+	2|SCEM_1.clean_(paired)_contig_109843:796-801|+	2|TWXB_1.clean_(paired)_contig_5975:896-901|-	0.94	0	0.92	GTTTAGTTTCCTGTCTTTTATGATTTTATCATATATGGGTTTTCAGGTCGGCCCTCTTAGGTGTTGGCCAGGTGGTCTATCTATATCGAGAACAATCGGCGACATAAATGCTAGCACTGCAATTGTCCCTATTCCACATGTTAAGCAAATCAAGGTTTGCAATTCAATAACCATTCTACCAAATTTGTTTCAGGAAAAAA	ATGTGCCTAATTTGCTGCAGTTATCAAATGCTGGAGGTCGAATAATCATCTCAAGTGATGGAGTGTGGGATGCATTAACTACTGAAATGGTTCTGAACATTTCTTGTGGATTACCTGCAGTTAAAGCAGCTACTCAAATCGTCGAAGTACATTATCTTAGATACTTTTTTCGACTAGTTTTGACACCAATTTGATTCAAT	TCGAGAACAATCGGCGACAT	59.827	20	100	100	GCATCCCACACTCCATCACT	59.746	20	100	100	200	285	484	CGGCGACATAAATGCTAGCAC	60.071	21	100	100	TGCATCCCACACTCCATCAC	60.035	20	100	100	190	296	485	TGCTAGCACTGCAATTGTCC	58.832	20	100	100	TGCATCCCACACTCCATCAC	60.035	20	100	100	178	308	485
PolynSSR_390	AAT	4|AHLA_contig_1223:2715-3126|+	4|SCEM_1.clean_(paired)_contig_31014:3572-3583|+	2|TWXB_1.clean_(paired)_contig_139186:2074-2079|-	0.94	0	0.97	AGGTAGTCATGTGAAGTTAGGTGCTCATCCGACACATCTGCCAGTTGCACCATAATAAATACACCTTTAGGTCTAAGATATTCATGTGATGTATGAGTGGAGCTAATACTGAATGATTAAAATCATGATATATGGATAAAAAGGGATACACAAGACGTTGGTGAAGTGGACAAACCTCTCTGCTAATGAAAAATAATTAA	AAAAAATAAAAATTGAATTGATCAGGTTATCATGTAGTGCTTCTCCAGTTATGAGGCCTTGCTATTGACTCTAAGACTAGGAATCGATAGAAGATAACACTTAGCTCTGTTTATTTCTGAATGCCTAGCACAAAAATAGTACCTGATCCATCAGATATTGTACAAGATCTTTCACTCCTGAACCATTTAGACCAGATATC	AGACGTTGGTGAAGTGGACA	59.172	20	100	97.5	GGCCTCATAACTGGAGAAGCA	59.79	21	100	100	118	352	469	AGACGTTGGTGAAGTGGACA	59.172	20	100	97.5	GCAAGGCCTCATAACTGGAGA	59.79	21	100	100	122	352	473	AGACGTTGGTGAAGTGGACA	59.172	20	100	97.5	AGCAAGGCCTCATAACTGGAG	59.789	21	100	100	123	352	474
PolynSSR_391	AAT	4|AHLA_contig_122952:504-915|+	2|SCEM_1.clean_(paired)_contig_68704:7574-7579|-	4|TWXB_1.clean_(paired)_contig_172060:397-408|-	0.94	0	0.8	AAAGATCTTTGATGCCGTACGATCCACTTGCATAAACTTACATATTTTTTTAGTTTGATAGATATTTTGTCCATCCACATTTGATATGCTTAACCCAAAAATACTTTTATATAAAATTGAATTCTGATCCTTAGCATGTTTGTTTTTGGCTGAGAAATTAAATAAATGAAGATCAAAAGTAATATAATAAACACAATACC	AAGAACATAGTAATAATGATAATCATCAAGGTTCTAAAACCTCACAAAAAATAAAAAAACTCATAATAAATTCATGATATATTATGAATCTGAGGATGTAAATACCAAAATAATCAAAGACAATTCGTCAAAAAATAAAAAAGACTGGTTTTCAGAAGCCTTTTTTCTCACAAATATCTCATACTACCTTCTCTGAAAAG	Primers not available
PolynSSR_392	AAT	4|AHLA_contig_134127:142-553|+	5|SCEM_1.clean_(paired)_contig_104006:1146-1160|+	N/A	0.5	0.33	0.99	TATATGAGAAAGTGGGCAAGCCATATCTTATGGGTGTGTACGAGGTACGACAATCTCAACATACCTCAAGCACCAGCACATTACTCACGAATCGAGTTTGATCCTAGGTCCTCTCCAAAACGAATACCTTACACAAGTGACCATGTGCTGCAATTGTTGAACATTTTCAAATATTTGTTTTAGTTTTTTTATTATTCTAA	ACTTGGTGTAATTGGTGTGAGAGAAGAGGGATTGGGCCTTTTGTCTACAATGAATCCATTTAATTGAATGAAGCCCAAGCCCATTAAAGTGAACCTCGGTACTTTGTTTACGTGAGAGTACCTAAATTTAATTTTGAATGATATTGCATTGAAAATCTATTTGAGTTGGTTGTATCAATAAGTACATAAGGAAAGTTTAT	ACCTCAAGCACCAGCACATT	60.179	20	100	100	AGGCCCAATCCCTCTTCTCT	59.955	20	100	100	189	203	391	GCACCAGCACATTACTCACG	59.556	20	95	100	AGGCCCAATCCCTCTTCTCT	59.955	20	100	100	182	210	391	ACAAGTGACCATGTGCTGCA	60.466	20	100	75	ATGGGCTTGGGCTTCATTCA	59.958	20	100	100	164	273	436
PolynSSR_393	AAT	4|AHLA_contig_13953:135-546|+	N/A	3|TWXB_1.clean_(paired)_contig_58603:286-294|-	0.5	0.33	0.98	TATACATATTGTTATAAGCTAGTACTTATTAGTTATTACCAAATGTTAAACAAAGAACATTACAAACAGTTGTACTATCGCATACCCACTTGTATTGTTATTTGTATATCGAAGAGACCCATATAGTTATAAATAAATTAGTTTTTGTAGACAATGAATATAATGGATTAACAAATAGATCATATACATGGTTAATATTG	ATGGGTTATCGTTATAATAGTAAAAATTATTTAAATGAGATAGGACTACCGTATTGATTATGTGGAGTATGATGTATGTACCCTGACAATACATGACTGCGTCTCATGCAGGAGTCCGAGGGCCTCGGCGGGGAGCGGGTTCAAGAGCCTTTTTATTTAGAGTAATGTTATGTGTACGTAATAGGTCACCCGAAATGTGA	TCGCATACCCACTTGTATTGT	57.38	21	100	100	CCACATAATCAATACGGTAGTCCT	57.902	24	100	100	200	211	410	TCGCATACCCACTTGTATTGTT	58.055	22	100	100	CCACATAATCAATACGGTAGTCCT	57.902	24	100	100	200	211	410	TCGCATACCCACTTGTATTGT	57.38	21	100	100	CCACATAATCAATACGGTAGTCC	56.574	23	100	100	200	211	410
PolynSSR_394	AAT	4|AHLA_contig_146636:129-540|+	N/A	5|TWXB_1.clean_(paired)_contig_86369:4218-4232|-	0.5	0.33	0.98	CAAGCATCATACGGTCGAGATCAGTGATGGAGCCCAGTGTTTGGTTGATCTTGATGTTGATAAGCAGTGTGACAGCAAGAACAGGCACTGGATATTATTGATGAGCATCAGGAGAAGGCCGACAAGTTGGGACACCAACTCAACCTTGCATCATCATCAAACATAATCCATCACTGATGAGATGAAGGAAAAATAATAAC	AAATATCTTGCTCTGAATTTTTAACTTCTTTACTGCCAACTTCTTGTCAATCAGGTTTTTGCAGAAATTAGTGCTTACTAAAGCATGCGTGTGTGTGATATCTCTAAAGTTGAGATCTCACATAAATTTTGATTCTTAAGGGGGGGACAGGGATTTGAATTATAACAAGCAGCAAAGCTGCAGCACCAGACAAGCATCCA	AGGAGAAGGCCGACAAGTTG	59.965	20	100	100	CACACACACGCATGCTTTAGT	59.736	21	100	100	200	237	436	GGACACCAACTCAACCTTGC	59.331	20	100	100	ATCACACACACGCATGCTTT	59.046	20	100	100	182	257	438	AGGAGAAGGCCGACAAGTTG	59.965	20	100	100	ACACACACGCATGCTTTAGT	58.407	20	100	100	199	237	435
PolynSSR_395	AAT	4|AHLA_contig_147948:8-419|+	3|SCEM_1.clean_(paired)_contig_162524:412-420|-	4|TWXB_1.clean_(paired)_contig_71432:598-609|+	0.47	0	0.97	TTTTTATTATTATTCCATCAAACAGCAAATACGGTCACAAAACTGGCTTTGGGCCCACACGAATGTCAGGTCCTCACCAATGACATGAGGCCACGTCACATATGAATCCGTTTCCCTCGAAATATATTCAAAATTTCAAAGCTCGAATCCGCGTTTCCCACAAATATTGTGGGAAAATTTCATGTAAATGAAATCCTCAA	TGAAAAAAAAATATCGCGAAGTACCATCGAAACAGCGACTCGGTGCGGGGCCCACGTAAACTATATAAAAAATCACCCAATAAGAACGTGCCACGTCATATTCGTTTGTTCACCCCACCCAACATTTGGGTGAAATTCTCGAAGCCCCCCCTCAACCCAAAAAAAAAACTCGGTGCGCGGTGAAAGTACCGAAAGGTCCT	CAAAGCTCGAATCCGCGTTT	59.834	20	100	100	TGTTGGGTGGGGTGAACAAA	59.959	20	100	100	200	143	342	AAAGCTCGAATCCGCGTTTC	59.557	20	100	100	TGTTGGGTGGGGTGAACAAA	59.959	20	100	100	199	144	342	CAAAGCTCGAATCCGCGTTT	59.834	20	100	100	CGTGGCACGTTCTTATTGGG	59.554	20	100	100	171	143	313
PolynSSR_396	AAT	4|AHLA_contig_150055:22-433|+	N/A	3|TWXB_1.clean_(paired)_contig_59965:1484-1492|+	0.5	0.33	0.99	ATATTCAATTCCATTATGTGCATTGCATTTTGCTCTTGTTTATCACTGACAGTGGCATACAGTCCGAAATATGTGATTGCCCACGTGGCATGCTTTGTTGTCCTACTATGGCAAACCAACAATCACCCGGATTAAAAATATTATTTAAAATTTTTAATATTTTTGGACCTAATGATGTGCCAACGATATGCCATGTGGCA	TTTCATTATTTTTTAAGTTTTTGTTCTTTTCAAAATGATGATACATTATCATATGCCAGATCATGCGACATGGATTTTTTAAATAATAAAATCATAAATGGTAGAAAACAAAATACAGTAATAAAAATGAATATTGAGCAAAGCCAAAGACAAAACAATTTTAAGATATTTCCTTGAATAAAAAGATCACAAATTTCAGT	GCCAACGATATGCCATGTGG	59.688	20	100	100	CCATGTCGCATGATCTGGCA	60.816	20	95	100	107	199	305	GCCAACGATATGCCATGTGG	59.688	20	100	100	CATGTCGCATGATCTGGCAT	58.764	20	95	100	106	199	304	TGCCAACGATATGCCATGTG	58.976	20	100	100	CCATGTCGCATGATCTGGCA	60.816	20	95	100	108	198	305
PolynSSR_397	AAT	4|AHLA_contig_154565:924-1335|+	4|SCEM_1.clean_(paired)_contig_63270:605-616|-	5|TWXB_1.clean_(paired)_contig_110558:382-396|+	0.47	0	0.98	CATAATCGCTTAACTATTTGTGTAATGGTATAATACCCTGTTTAGTCTTTCTATTATACCAAAATAGTCCTTTAGTCCCCCTATTATCTTTTTCTCTTATGTGATCCCTCTATTATTCAGTTTGAGTAAAGATAGTCCTTAACACTAACACCAGTGAGTTTTTCCGTTGGTGAGGCTGGTGTGGCATTTTGAATGATTAA	AACCTTAATGGAATGCCAGCTCATTAACTTACTCCTCTAAACAATGACTTAACAAACCGGATCTAGGTTGAAATCGAATCATGATCCGAGAAGAAAATTCATACATCTCGTTGTCGTGCATCACCTTCAGTGAGCATTTGCTGGCGGAGGAAGCTGTCAGCACTGGTTCCACAATGGACGGTTCCAACCCCTCTTTCCCA	GAGGCTGGTGTGGCATTTTG	60.038	20	97.5	100	GAAGGTGATGCACGACAACG	59.836	20	100	100	169	371	539	GAGGCTGGTGTGGCATTTTG	60.038	20	97.5	100	AAGGTGATGCACGACAACGA	60.25	20	100	95	168	371	538	GAGGCTGGTGTGGCATTTTG	60.038	20	97.5	100	ACTGAAGGTGATGCACGACA	59.607	20	100	100	172	371	542
PolynSSR_398	AAT	4|AHLA_contig_20149:3609-4020|+	4|SCEM_1.clean_(paired)_contig_69033:1164-1175|-	3|TWXB_1.clean_(paired)_contig_48988:1176-1184|-	0.47	0	0.99	TACTTGTATACTAGCTAAATGTTGCCGATGTTCTGATAGAGCTGAAGCTAATGATTCTGCATGATCACTAGAGCCAGTATCAGATGCGCAACGAAGCAACTCCGGGCCTTCTCCATCATTAGCCTTAGCCTATGACAAAAACAGTTCTGTACTGGTCAATTGGGCCTCATGATTCTTAGAAAGAAAAGCAAACTTAAAAA	ACAAGTTAGAATAACATAAGCCAATCCAACCCATAATAATATTTTGATTTTAGAACCAAAGCTATGAGTTTAAGAAGCATATAAATATATTAAATGATGCCATTGCAATCATACTTTGTGCAACTCATTGAGAACTATATCTCTTAACATTTTACAATTGACAACACAGTGTGTATATCATTTACAGGCTGATTGTTTCG	AGCCAGTATCAGATGCGCAA	59.821	20	100	100	TGGGTTGGATTGGCTTATGT	57.082	20	100	100	174	271	444	GCCAGTATCAGATGCGCAAC	59.694	20	100	100	TGGGTTGGATTGGCTTATGT	57.082	20	100	100	173	272	444	AGCCAGTATCAGATGCGCAA	59.821	20	100	100	TGGGTTGGATTGGCTTATGTT	57.817	21	100	100	174	271	444
PolynSSR_399	AAT	4|AHLA_contig_21282:26-437|+	4|SCEM_1.clean_(paired)_contig_11065:2893-2904|-	5|TWXB_1.clean_(paired)_contig_113241:600-614|+	0.47	0	0.98	GAGTCTCTATCATAGGGTTTTCCTAAAGCGAAGGGCTTACCGACACCAAAGTTCTTGGCCATGCTAGCACCTAAAAACCTATTAATCTAGGTACGAACTAGTGCAAAAGGAACACCTTCCTCAAATACACAATCCAAACATGAATTATGGAGTTCTCTATAGCGTAATTCAAGCACACAAGTATTATAGATTGAATTTCA	GCGTTAACCAAACCAACATCCACAAATCACATGTTCATCCCATGGTTCACCAAAATTTAGTGGCTTTGGGGATTTAGTTCAACATAAACTTCAAATCAACAAAATAAAGCTTGATTAAGAACAAGAAAAACATGTCTAAACTCCCCCTTTGATGAAGATGATGGCTATGAGATGATGAAAGTTGAAAGCACCCAAGGACA	CTTGGCCATGCTAGCACCTA	59.819	20	97.5	100	TGTGGATGTTGGTTTGGTTAACG	59.933	23	100	91.3	183	78	260	CCGACACCAAAGTTCTTGGC	59.689	20	100	100	TGTGGATGTTGGTTTGGTTAACG	59.933	23	100	91.3	197	64	260	AGTTCTTGGCCATGCTAGCA	59.671	20	100	90	TGTGGATGTTGGTTTGGTTAACG	59.933	23	100	91.3	187	74	260
PolynSSR_400	AAT	4|AHLA_contig_22995:2411-2822|+	4|SCEM_1.clean_(paired)_contig_36712:2066-2077|-	3|TWXB_1.clean_(paired)_contig_126068:586-594|-	0.47	0	0.98	GAGTGGGCAGGGTACTGAGCTATTTGTGGGGTGTGGGGAGAAGATGGAAAGTTAGGAATAGTGGGAGGTGGGCCTGTTTGTGAGGTCAGATGATGGATCACATAGGGAGACAATCCTTCATCCAAAATATCATAATTATGAGACAAAGGAGTATGCAACTTAGCAAAAGGAAAATGTGTCTCATCAAATATTACATGGTG	TTTATTCGATGACTAATCATAACATTTATAACCACGATGATTTAAAGGATAACCCAAAAAGACATATGGGGTTGAGCGGGCCTGTAGTTTGTTTATGGTAGTGGAGGGGTAAAAAGGATAACATAAACAACCAAACAACCGAAGATGAGAATACAATGGGTCTTTTTGATAAAGAATTTGGAGAGGGGATTTATAGGCTA	ATGGATCACATAGGGAGACAATCC	59.712	24	97.9	91.67	CCGCTCAACCCCATATGTCT	59.53	20	100	100	199	292	490	ATGGATCACATAGGGAGACAATCC	59.712	24	97.9	91.67	CCCGCTCAACCCCATATGTC	60.535	20	100	100	200	292	491	TGAGACAAAGGAGTATGCAACT	57.376	22	100	100	CCGCTCAACCCCATATGTCT	59.53	20	100	100	153	338	490
PolynSSR_401	AAT	4|AHLA_contig_23456:2511-2922|+	3|SCEM_1.clean_(paired)_contig_30609:537-545|-	3|TWXB_1.clean_(paired)_contig_41943:2091-2099|+	0.47	0	0.99	TTGTAGAATTCAGTATTTTTTTAATAATTTAAATTCAGTGATCCATAATGGAATTTATAGAAAATGAACCAACGCGTTTCATTTTGAATTCAGACCCATGATATAGTTTATGTTGTGGCTGTCCTTAGGCTTTTCTCGTCTGCCCCATATAACTATTTTTTTAATTACCTCCTACCAGCTCTCCCTAAAACTGTGAAATG	TTCTGTGGTTTAAATTGTATAACAGTTTGCGTACAAGCCCTTAGAATTTTAAAACTTACATAAAAAAGCCAGAGATCTAGTTCCACTCTATAAATAACTTATGTGTTTTAAACAACTAAAACAGTAAAACAATGACAAATAGTGAAAAAGATGTTACATGAGTACCTAGATGAAAGCGTTTAATTTTTTAGATGGGTACA	GTTGTGGCTGTCCTTAGGCT	59.963	20	100	100	AGGGCTTGTACGCAAACTGT	60.179	20	100	100	142	311	452	TGTTGTGGCTGTCCTTAGGC	60.251	20	100	100	AGGGCTTGTACGCAAACTGT	60.179	20	100	100	143	310	452	GTTGTGGCTGTCCTTAGGCT	59.963	20	100	100	GGGCTTGTACGCAAACTGTT	59.334	20	100	100	141	311	451
PolynSSR_402	AAT	4|AHLA_contig_25389:3027-3438|+	N/A	2|TWXB_1.clean_(paired)_contig_163065:663-668|+	1	0.33	0.98	AAGCACTGCAATAAAGTAGCTAGAGAACTTTCTACATAACTGTCATACTAAACCAAGCCATTACTATTTAACCACTATACACATTTAAAATATCATCATAAGCAGCAATGCGGGACCTACAGCAATCACGGGACAAAAATACTTCCACTGGCAGAAAAATTAAAGGCAAATGATTAAAAAGGCATTTATGTTAAGCAACA	AGGAATAAATGTTGAACATAAATTAGTCACTAATATTACTTTTAGTGATCATAAATCCTTTAACGAGAAATAAATATATATCAGTAATAAAGTGAAATTAATCAAGAAATTAAAGAATATCTTTTCTAGTAAAAATATCAAAGAGTATCTTATCCACATATAAAAGCCTACTTGAGGTGGCCTCTTGTTCAAGCGCAAGC	Primers not available
PolynSSR_403	AAT	4|AHLA_contig_31579:746-1157|+	4|SCEM_1.clean_(paired)_contig_72152:1395-1406|+	3|TWXB_1.clean_(paired)_contig_158319:338-346|+	0.47	0	0.99	TTTTAATGAGTTTCCCTTATTGAAAATTTGGAGAGACTCAAATAGTCAATGTTCCTACTTACCACTTAAGATGCCTTTAGTGGTCCATGATAGTTACCACTTACCTAAGCACCTAAAGCCAATTTTCATCACATGAATTGCCTTTTTTTTTATTTTACTTAAATGAAAAAAAAATATTACCATCCTATTGTTTATAAAAA	GCCAAACAACCGGAATAAAATATTTAAATCAAATATTTAATCGTTAGTTGCAAAAGTGGGATGACATGGTTAATTACTTTTGTATATAAAATGTAACGTTGTTGTCAAAATATAAACCAATTCTTCTTTATATGAAAGTTCTTGTTATGCGCTTTAGTTCTTTTTAATTAAAAATATTTAATGTCTTTTTCAAAATATAT	ACCTAAGCACCTAAAGCCAA	56.733	20	100	100	CCATGTCATCCCACTTTTGCA	59.106	21	100	95.24	179	302	480	ACCTAAGCACCTAAAGCCAA	56.733	20	100	100	ACCATGTCATCCCACTTTTGC	59.105	21	100	100	180	302	481	ACTTACCTAAGCACCTAAAGCCA	59.414	23	100	100	CCATGTCATCCCACTTTTGCA	59.106	21	100	95.24	183	298	480
PolynSSR_404	AAT	4|AHLA_contig_33746:6285-6696|+	6|SCEM_1.clean_(paired)_contig_93160:4675-4692|+	5|TWXB_1.clean_(paired)_contig_94602:849-863|+	0.82	0	0.99	ATTTAGCAAAATAACCAATTCTTTTTTTCTAGCTAATCCCCATCTATTCTTCCCAATTAATTAATGCAACTAATTAAAGTTATTAAACAAAATGTACAGTAAATAGTTATTTGATTCCTAATAGTCCAAGGGCTCCGAGACATGGATTGTATGGATGCAACTGTTTTATAAATTACTATCAAATCAGAGTTGATAAACAA	TATTATAAAACAGAAAGGGTTAGTGGCAGATGGGTGAGAGAATCTGGGCACGAGGGAAGAGGGTGGTAGGGCACATGGAAGTGAGTGAAAAAGAAGAATAAAAAGCTCTCAAGAGAGATAAAATGCATGGTGGACAGACAGATCATGGGAGACATAGTTTTCACATCTCTTTGTTTTTTATATGTCTCCCTCTCTATCAA	GGCTCCGAGACATGGATTGT	59.821	20	97.5	100	CCTCGTGCCCAGATTCTCTC	59.896	20	100	100	137	330	466	ATAGTCCAAGGGCTCCGAGA	59.738	20	100	90	CCTCGTGCCCAGATTCTCTC	59.896	20	100	100	147	320	466	GGCTCCGAGACATGGATTGT	59.821	20	97.5	100	TCTCTCACCCATCTGCCACT	60.252	20	100	100	123	330	452
PolynSSR_405	AAT	4|AHLA_contig_33953:7837-8248|+	N/A	3|TWXB_1.clean_(paired)_contig_119455:2157-2165|+	0.5	0.33	0.99	GGTTTCCAAGATCGAAACGAAGGTGAAGATGTAGAATGAGAAACCGCGAACGGTGGCTTTCGACTGAGTCTGGGGGACGAGATAATATATAAAAATATGGATTTTTAGGATTTAGACATGGGTATAATGACCGGCAGGTGCACTTACCGCATTATTAATCAAAATATTTAAATACTTATATTTTCAATTAAAATGAAAAA	AAAACGTAAATATAAAACCCGCGTTTCCAGACGGTGGATGCGCCAGCGAGAGCGAATGGCTCGGCGAGCTCACCATCATCTCAGGGAGGTGGGCTTCATCGCCGGCGAGGACCTCGCCGATGTCGGTGCCGGTGAGAAGGAGGGCTGGCTCTCTGATTCTTCACTTCTCGCCGCTCTCCATCCCCGCGCCCTCGCCCTCG	TGGCTTTCGACTGAGTCTGG	59.682	20	100	100	GTCTGGAAACGCGGGTTTTA	58.771	20	100	100	191	253	443	GGTGGCTTTCGACTGAGTCT	59.681	20	100	100	GTCTGGAAACGCGGGTTTTA	58.771	20	100	100	193	251	443	GAACGGTGGCTTTCGACTGA	60.599	20	100	100	GTCTGGAAACGCGGGTTTTA	58.771	20	100	100	197	247	443
PolynSSR_406	AAT	4|AHLA_contig_36678:2128-2539|+	2|SCEM_1.clean_(paired)_contig_44584:533-538|+	N/A	1	0.33	0.97	TCAATAACATGATTGAATCCCACAAACTTCATTATGAAAGAAAAGAATGACCATAAAAAACATCCCAGGGCAGGGCAGTCATGACCAGAGCTCCTGCCAAATTCCTTTCCCCTGAGAGCCCCCAGATGAGCTGCAAACTATTCAAGAATGTAAGACATAAACAATTACATTATGTCATTGTGCTGCAGCTTTAAATAAAA	ACTTAAATTAGATATGTGGACAGATAATTTGAGACATGAAAAACTTCTAGAAACTGACACTTATAATGGAACGGAGGGAGCACTTTCATAACTTCTTTTTGATATATTTTGTTGTATACCTTGCAACTGGAATTGGATCAGAAAATGTCTCATGCACAGCTGATGTGTTTAGATTATACTCTCTCACAATTGTCAATCAA	CCCCAGATGAGCTGCAAACT	60.323	20	100	80	TGAAAGTGCTCCCTCCGTTC	59.965	20	100	100	181	319	499	CCCCAGATGAGCTGCAAACT	60.323	20	100	80	GTGCTCCCTCCGTTCCATTA	59.46	20	100	100	176	319	494	CCCCAGATGAGCTGCAAACT	60.323	20	100	80	GAAAGTGCTCCCTCCGTTCC	60.674	20	100	100	180	319	498
PolynSSR_407	AAT	4|AHLA_contig_36835:9098-9509|+	N/A	3|TWXB_1.clean_(paired)_contig_21424:214-222|-	0.5	0.33	0.98	AAATAATGGTAATTTGGAACTTTGTAGATGTGTATAATCACATCAATAATTTTTTTTTCTTACAAATGCATTACAAATGCAACCTGTGCCAACAGATAAGAAATTGATAGTTCAACTGTATGTACGAACCATTAATTAATCATTCAATAGGTGTGCTCAAGGTCAAAATGAAAAAACAAACGCTAATCTTATCAATATTA	TTATTAATGTTAATATATTATCATGCATTAATAAAAAAGTATAATAGAAAATGCCATCTTAACACTGTTTATATTATGAGCTGCTAGAATGTAAATGGCTTATAAAGTTGTGTGCTTAATGATACATTCATTCATTTGTTCTAATTCTTCAAACTATTTAGGTGTCGTCTTTTCAACCAATAATATCCAGGTTCCCTCAC	AGGTGTGCTCAAGGTCAAAA	57.565	20	100	100	GCCATTTACATTCTAGCAGCTCA	59.121	23	95.5	95.65	163	348	510	GGTGTGCTCAAGGTCAAAATGA	59.377	22	100	100	GCCATTTACATTCTAGCAGCTCA	59.121	23	95.5	95.65	162	349	510	AGGTGTGCTCAAGGTCAAAATG	59.375	22	100	100	GCCATTTACATTCTAGCAGCTCA	59.121	23	95.5	95.65	163	348	510
PolynSSR_408	AAT	4|AHLA_contig_4293:4421-4832|+	5|SCEM_1.clean_(paired)_contig_34383:1504-1518|-	N/A	0.5	0.33	0.99	CGATAATTTCAACTATTTTACTAATTTATATTTAAATATCATTTTACTCTTACAGGTAGACAAGTACATAAACAATTTTTTTAGTTTCCCGGATATCAAATAAATAATTAAAAAATTAGCAGTACAGGACAAAAAAAAGCCCTGCAATGAACACCAGCGTTTCGAATATTAAGCTTTTTTAGTGGTGTATATAAGCAAAA	GATATAAATTGGCAATTGCCGAAAAAGCAAAAGCGAAATTATTACCCGGTAATTCCATTTCCCGCCCCGGCGCGGGCACCCGCTCTCTGTCCTCCACTAGCGAGGCCAACCTCCCTGCATTCAATCACATCCGTCCAAAGATCATCAAATGGAGACGAATCTCGAGCTTCAGAGGAGTGATTTCGAGAAAGGAGTAGGGG	CTGCAATGAACACCAGCGTT	59.688	20	100	100	CGGGGCGGGAAATGGAATTA	60.467	20	100	100	140	341	480	CTGCAATGAACACCAGCGTT	59.688	20	100	100	TCGCTAGTGGAGGACAGAGA	59.381	20	100	100	174	341	514	AAGCCCTGCAATGAACACCA	60.47	20	100	100	CGGGGCGGGAAATGGAATTA	60.467	20	100	100	145	336	480
PolynSSR_409	AAT	4|AHLA_contig_50655:533-944|+	N/A	5|TWXB_1.clean_(paired)_contig_53320:559-573|+	0.5	0.33	0.97	AATTTTTCTAAGTTCTATCATGATATTCCTTCCCATTATTTTCCTTTATTTCATTTGCAGAGTTTCAAAATATAGTCCACAGCGAGATGCATAATGAGCTGCAGGAGTGAATCAAATGCTTTCCAGTCTGAGGCTAAAAAAAAGAGGACAAATATATATAACAAATATATTTCTCCAAGGTAACAAATAATAACAAAGAA	AGAATGATCTTTATTTCTTGTGAGCAAGTACATGCTATGACAAATCACAAACATAATTCACAAACAACTATAATGGGTCAACAAAACAAAGGCCATGCACACTATAGCACAAGCCCAGGCTTTAGGAGTTGTATTTTTTTTTTCATTCAATAGCTTCGGTAATATAACAACAAACAAAACTCATACAACGCATGGAAAAT	ATGCTTTCCAGTCTGAGGCT	59.01	20	100	80	AGTGTGCATGGCCTTTGTTT	58.878	20	100	100	200	315	514	ATGCTTTCCAGTCTGAGGCT	59.01	20	100	80	GGCCTTTGTTTTGTTGACCCA	59.792	21	100	100	191	315	505	ATGCTTTCCAGTCTGAGGCT	59.01	20	100	80	TGTGCATGGCCTTTGTTTTGT	59.791	21	100	100	198	315	512
PolynSSR_410	AAT	4|AHLA_contig_54598:603-1014|+	3|SCEM_1.clean_(paired)_contig_105738:1534-1542|-	N/A	0.5	0.33	0.98	TGATGCTTGATAATTCATCGATCTTTTTTTCTTTATAGATTCATCAATTCTATTCCAATTTTGATTTATTGAAACCTTAAATTTTTAATTTTCCATGGTTTTAGAGTCAATGGCATGTTAGGATGTTGAATTAGGGCAATTTAAGGTATAGAGGCTTATACATAGAGTGAAGAGATTGGATTTGTGAATAATTACGTACA	CCAAGTTTAAGTGTAATTGAATTAAATTTTAATGATGATCAAGTAGCAAGAGCTAGAGTAGTTCAATGCAACAATTAATATATATGCCCTTAAGAAGTTCAGAGGGTTGAAGAAGCTACTCAATTAAAGGAAACAACATTCTGCACGAGTTACCCACATTCTGGTGATGAGATGGAATACATCGGCTTATGTAGCAACGC	AGGGCAATTTAAGGTATAGAGGCT	59.335	24	100	100	AGCTTCTTCAACCCTCTGAACT	59.292	22	100	50	197	332	528	GGGCAATTTAAGGTATAGAGGCT	58.013	23	100	100	AGCTTCTTCAACCCTCTGAACT	59.292	22	100	50	196	333	528	AGGGCAATTTAAGGTATAGAGGCT	59.335	24	100	100	CCCTCTGAACTTCTTAAGGGCAT	60.054	23	95.7	100	186	332	517
PolynSSR_411	AAT	4|AHLA_contig_5560:3191-3602|+	4|SCEM_1.clean_(paired)_contig_10085:1344-1355|+	5|TWXB_1.clean_(paired)_contig_132036:426-440|-	0.47	0	0.98	TGTCCCTTCTCTAGAAAGCAATGCTTTATGCATGCCTTCTCAGAGATATCAGGGCCTCTAATTAAGCGACTAACCCACCAAATTGTAGATGATTGTGAATTTTATAAAATGATTTTTTTGGCGATGTTCTCCTCCTTCATTAAGATCATATTCCATCCCAACAAAATCTCACAAATTACCCGGCCTCATGCAAAACCAAC	AAATTTTCTTCCTCATGTCATGTTCTCTATCTATTCATATCTTTGTTTCACATGCCCAGACCATATATAGCACAGTATCATGGATTGCGGTTACTAATATTGGAGACTTTACCTGGATTTCCACGACCCATCCCATGAAACCAAGCAAATTACAATATTTCATCGTATTGCATTTAATTTTATTTTTCAGTTTAACTAAT	ATTACCCGGCCTCATGCAAA	60.034	20	97.5	100	GGTTTCATGGGATGGGTCGT	60.034	20	97.5	87.5	180	374	553	AATTACCCGGCCTCATGCAA	60.034	20	97.5	100	GGTTTCATGGGATGGGTCGT	60.034	20	97.5	87.5	181	373	553	AAATTACCCGGCCTCATGCA	60.034	20	97.5	100	GGTTTCATGGGATGGGTCGT	60.034	20	97.5	87.5	182	372	553
PolynSSR_412	AAT	4|AHLA_contig_57436:590-1001|+	3|SCEM_1.clean_(paired)_contig_40992:2479-2487|+	N/A	0.5	0.33	0.98	CCGTCCAACAAACCTCACATGTAACGCACCAGCGTTGACTAGTCAACACTAGGGTTAAGTTTTTTTTTTTTTTTTTTTAAATCAGTTAGCTTCTGTATGAGATAAACACTGGCGGTTTGATACGGCTTCAAATATGGATTTTTATTAACGTCTAATTACTAGAAGAAAAGATTATGAAGATAGAATTGATATTGACTAAA	TACAATAATATGAACCTTGAGAACTAGTCCTAGAATCTCCAAGATATTTATAATGGAAATAAGTTTGTCCGTCTTTTATGATTGCTTGAGGAGCTGGCTTACTGTCTCTAAAAGAAATCACTAGAAGTGCCGTGCTTCTAACATATGGTTCTAATTGGGTTGCGGCTGAATTCTCTGTGTATATAAACTTCTATGTAAGG	ACACTGGCGGTTTGATACGG	60.672	20	100	100	CCTCAAGCAATCATAAAAGACGGA	59.364	24	100	100	198	305	502	GCGGTTTGATACGGCTTCAA	59.2	20	100	100	CCTCAAGCAATCATAAAAGACGGA	59.364	24	100	100	192	311	502	AACACTGGCGGTTTGATACG	58.847	20	100	100	CCTCAAGCAATCATAAAAGACGGA	59.364	24	100	100	199	304	502
PolynSSR_413	AAT	4|AHLA_contig_5915:1161-1572|+	3|SCEM_1.clean_(paired)_contig_43728:846-854|-	N/A	0.5	0.33	0.99	GAACTCATACAAAGGGAACTTACAGGACAATGCAGAACTTTGTTATCGTTATTCACTCACTCACAAAACAGAACATAAAGAAACATACCTCATGGCTGAGCCCAAGCCATTGCAACAATGAGAGCGAGATAATCCTAAACGAAACTTGGCCCATTGGGCATTGAATTTTTCCTAAAATCACTCTTTATATATTACAAAAA	GATTATCCAAACTCTAAAGAACATTGCTATTAGTATTTCTCATACAACGCCACATTTTCATTGGCAAAGTCAAGGCTGTGTTGATGATTGTCCTTCATCACACTCATCTTGGCCGGATACCTGAAACGGCTATTCTCAATGTCTTTTTCTGTCACCTAAGATAAATAGTGTACCATAAAGTGTAGAAAACTGCAAAAAAA	GCCCAAGCCATTGCAACAAT	60.322	20	100	100	ACACAGCCTTGACTTTGCCA	60.396	20	100	100	194	299	492	AACGAAACTTGGCCCATTGG	59.321	20	100	100	CCGGCCAAGATGAGTGTGAT	60.108	20	100	100	191	337	527	AACGAAACTTGGCCCATTGG	59.321	20	100	100	ATCCGGCCAAGATGAGTGTG	60.108	20	100	100	193	337	529
PolynSSR_414	AAT	4|AHLA_contig_61452:3421-3832|+	N/A	2|TWXB_1.clean_(paired)_contig_47222:6657-6662|-	1	0.33	0.72	ACCTACTGTAACAAGAAGATTACTGAAACTTACCAACCAAGTAAAGCTACGCGGAATAACTGATGTTTCTAGGAGACCGATCCAAATGGCTGAAAGAGCCACTAGCAATCCCATAATCTTCAAAATATGCTTCATATGTATGGTTTGATTGTTTCCGGGCGTGTACCTGAATGAGAAACAATGAATAAAGATGAAATATC	GCAAAAGAATCACTTTCTTGGTTACAAGGAAAACAACTGCAAGCATCAAAATTTCTAAAAAGGCAAGTGAAAAGGTAAAAGCAAGAGATAGCAACCTTGATTTCAATTATTCTTATGCACATTAGAAAACTTAAAGCAGCTCCTTCCAAAAAATTTTTAAACAAGGTAAGCACAAAAACCTCAAAACTACAAAGATACCA	TGATTGTTTCCGGGCGTGTA	59.965	20	100	100	TGCTTGCAGTTGTTTTCCTTGT	59.767	22	100	100	112	345	456	GGAGACCGATCCAAATGGCT	59.819	20	N/A	N/A	TGCTTGCAGTTGTTTTCCTTGT	59.767	22	100	100	186	271	456	AGGAGACCGATCCAAATGGC	59.819	20	N/A	N/A	TGCTTGCAGTTGTTTTCCTTGT	59.767	22	100	100	187	270	456
PolynSSR_415	AAT	4|AHLA_contig_62626:2870-3281|+	3|SCEM_1.clean_(paired)_contig_121931:1670-1678|+	4|TWXB_1.clean_(paired)_contig_38025:404-415|+	0.47	0	0.97	GGTTTGTAGAGTTTGATTTATGCCACATCCATAGCTGATAGTGATAATCTAAAATATTGCTGGCCTCTAATTTTAAGTATAAAAATGTGTCCCTAATAAATGTTGTTTTCTTTATTGTCAAATCAGAAACCCCAATCACAATGATTCATTCTCCGTTGTCACAAGTAAACTTCAAAATAAAAATACAAAATTTAAAAAAA	AAAAGTTTTTATCATAGTTATCTTGTGGAATTATTTAAACACAATAATATGATTGAGACAATAGATCATCTGACATTGCTCTAGATTCCATTTTGGTCCACATGAAAAATTATCATGTCTGTAGCTATCCTGACATTGACATGCATCTCAAATAAAACTATTATTTTTATTTTTAATTAATTAATACTATGAAAAAGAAA	TCATTCTCCGTTGTCACAAGT	57.531	21	100	100	TGGACCAAAATGGAATCTAGAGCA	60.019	24	100	100	167	345	511	TCATTCTCCGTTGTCACAAGT	57.531	21	100	100	GTGGACCAAAATGGAATCTAGAGC	59.663	24	100	100	168	345	512	TTCATTCTCCGTTGTCACAAGT	58.196	22	100	100	TGGACCAAAATGGAATCTAGAGCA	60.019	24	100	100	168	344	511
PolynSSR_416	AAT	4|AHLA_contig_62778:4313-4724|+	5|SCEM_1.clean_(paired)_contig_56523:730-744|-	2|TWXB_1.clean_(paired)_contig_47818:4301-4306|+	1.25	0	0.82	TTCTCCACCAATTTGAACACTAGCCTTCAAGGCGGGGAAGGTAGACAGAATACCTTCACCTTTTACGACTTTGGAGTTGAACATTGTCCCTGGTTGTCTAGCCATGTCTATACATGGGGAAAGCTTCAATGCATGTCACGAAGACTTTTGGAGGCCATTCTACGGAAGGAATCAAATCAAGGCCAAATAATAACAATAAC	ATATATGATAAAAAGGATCACAGGTATCCCACAGCTTTCCACCATTCGAAGGAGGTAAAAATTCCAACACAGCACCCATAAAATATACCAAAATAAGATGCCAAGAGCTATCTAATGCAGAAATCCATAGCTTGCTACAGCTTTTTCCACATCTTATTTCTGTATGAGATGAGGCCGAATAACAATTCCTGTAGTATTTG	GGAGGCCATTCTACGGAAGG	59.893	20	100	100	AATGGTGGAAAGCTGTGGGA	59.518	20	100	100	109	349	457	GGAGGCCATTCTACGGAAGG	59.893	20	100	100	CGAATGGTGGAAAGCTGTGG	59.477	20	100	100	111	349	459	GGAGGCCATTCTACGGAAGG	59.893	20	100	100	ATGGTGGAAAGCTGTGGGAT	59.294	20	100	100	108	349	456
PolynSSR_417	AAT	4|AHLA_contig_64865:4089-4500|+	2|SCEM_1.clean_(paired)_contig_107910:215-220|+	N/A	1	0.33	0.97	AAAAAAAAAAATGTAATCTGCAGGTTGATGAAGAATGCCTACCATATAGTCACTAATGCGGAAGTCTCAATATTTTTAAGAGCGTTGCATTCATTTTTCTGCAGTTGGGATCTAAGAGTTTCCATTTCCCATCTCATTATAACTTCTTTCACTTCATTTGATTCTGCCCCCTTCTATGGGTATTTCAATCATATTTCATG	CCTTTATGGTCAAATATCCACCAACAAACTCTTACTTTCCTTAATCATTTTCTCCTGTTCATATTTTAGGCTTTTTGCATGCTGAATACGCCATCGGCAACTATTAGATAATCCAATTGAACACAATCATGGCTGCAAATATAGCCAAATATTCTCTCTGTCATCTCCACACCTCTACTAAACTTTAAATCACTTTCCAA	AGAGTTTCCATTTCCCATCTCA	57.065	22	100	100	CGATGGCGTATTCAGCATGC	60.111	20	100	90	194	314	507	AGAGTTTCCATTTCCCATCTCA	57.065	22	100	100	CCGATGGCGTATTCAGCATG	59.486	20	100	85	195	314	508	GAGTTTCCATTTCCCATCTCA	55.56	21	100	100	CGATGGCGTATTCAGCATGC	60.111	20	100	90	193	315	507
PolynSSR_418	AAT	4|AHLA_contig_65519:333-744|+	2|SCEM_1.clean_(paired)_contig_36753:181-186|-	N/A	1	0.33	0.71	ATGTTATGTTAAATTTTACTTAATATTGAAAAAATAAAAAATTGACGATGAGTAAATATTATGTTGTGAATTATATATTGTTTTTTGAAATATTATTATAAACAAAACAAAATGAGCAAAGTTGTACTCAACTTTAACTGAAATCATCTTATTACCAATAGAAAATGAATTTAACTTTATGTCAAATGACGTGAAATGAA	TTTTTTATTACTAGAAAAAGATATTTCCAAGGTTATCAAGTTCAAAAAATTAGTAAAAGAAATAAGTAATTTATAAATACTATAGTCAATTTTCACCCTAAACTAGTGTTGCTTTACAAATCTGAAAAAATCCATGTGACATCGATATACTTTTTTTCTAATTAAATACAATTTGTAAGAATAAATACAATGTTTAAAGT	Primers not available
PolynSSR_419	AAT	4|AHLA_contig_66770:194-605|+	N/A	2|TWXB_1.clean_(paired)_contig_120915:285-290|-	1	0.33	0.97	ACTTATATGCAGAGGTTTAACTTTTGGCTTCAAGAGATAGAGAAAGAGAACCTAGAAGACAGGAAATGGCTTGATCATGAAGACAGACCTTATGCAAGTTAGACCAGGGCACTGTTCACAACCTCAAGCAAATGTGACATTTTACTTAACAATGTTTGTGAGTGCTTTAACATGTATATACTTGATGCAACGGACAAGGG	GCTTGAGATGATTAAGGTGAAACTAATGAGAAGAATGAAAAAGAAGAAGGAACAAATGATGAAGTACAAGGGGAATATCTGCCCAAAGATCCATAAGAAGCTTGATAAGATGAAGTAAGAGAGGCAGTATTACACACTAGATTTTTCAGGTGTGCCCAAGGTCTAGATCATAGGTTGTGAAGGGCCATATATTGTGGATA	TTGATGCAACGGACAAGGGA	59.89	20	N/A	N/A	ACCTTGGGCACACCTGAAAA	60.033	20	95	100	193	374	566	TTGATGCAACGGACAAGGGA	59.89	20	N/A	N/A	CTAGACCTTGGGCACACCTG	60.036	20	100	95	197	374	570	TTGATGCAACGGACAAGGGA	59.89	20	N/A	N/A	TCTAGACCTTGGGCACACCT	60.179	20	100	100	198	374	571
PolynSSR_420	AAT	4|AHLA_contig_68148:1875-2286|+	4|SCEM_1.clean_(paired)_contig_65685:2147-2158|+	5|TWXB_1.clean_(paired)_contig_9579:2109-2123|+	0.47	0	0.99	ACTCCAGCACAGTGCCCATGTAGGAATACAAGAATGTTTGAGAAGTCACATTAATTCAGCACGCAAGATGAGAGGTATTTGTTGCAAATAATGCAACATCATCAACTGTAGTTTTAAATAGGCTTGAGTATACATGACCCAATAAATGAAGTTTTGGAATGTATAAAGGATCTCCGCCAGGCTATACACCAATAGAATAA	AACAAATACAATAATAACAACAATAGTAATTAATCTGATATTTTTAGAATAAAATATATCGTCAGTCATACAAAAGCAAAGGCACATATATTGAGTAGAACTGTAGAATATTAAAAGCTAGATGTCTTTGAATTTAATATTGACAGATATGCTATGCACGGAAAAGAAATTGAAGTTTTCACTAATTTTGCTATATAGAC	CCGCCAGGCTATACACCAAT	59.891	20	100	100	CCGTGCATAGCATATCTGTCA	57.969	21	97.6	100	200	373	572	CCGCCAGGCTATACACCAAT	59.891	20	100	100	CCGTGCATAGCATATCTGTCAA	58.607	22	97.75	100	200	373	572	CCGCCAGGCTATACACCAAT	59.891	20	100	100	CCGTGCATAGCATATCTGTC	56.188	20	97.5	100	200	373	572
PolynSSR_421	AAT	4|AHLA_contig_68795:180-591|+	2|SCEM_1.clean_(paired)_contig_61049:3085-3090|-	N/A	1	0.33	0.96	TGAAACCTCAATTTTTTTTTTTTTTTAAATTTTATTTTACTCTGCATAGAAGGAAATTCGACCTCTGATCTCCGCTAACATTTAAAATATCAGAATGTTTTTACTTTGATAAATTTGATTCGATCTCGATTTTTAACCAATGATCTAAAATAACAAAACTCAAAATTATATGTTCACACCAATATTTATTTAATTAAAGA	TTTAGAGTGTTAACTGAAATCAATTGTGTTTTCACTCTCAACAAAATATGGAGCTTTCATTTGTCAGAGAAGGAAAGTTTCTCAAGCAATCTCCGACCATATATGCGTGCAACAAATATCTATATATATAGCACAAAAGGACATATGCATCTATCAAAGAGTTCACATGAGCACAAAAATGTTATCCACAAATTTGTGTG	Primers not available
PolynSSR_422	AAT	4|AHLA_contig_70906:665-1076|+	2|SCEM_1.clean_(paired)_contig_29018:3257-3262|+	6|TWXB_1.clean_(paired)_contig_166015:556-573|+	1.63	0	0.91	AAAGTGAATTCAGTCCAATTACGTTAAACTCTTTCACAAACCAATCAAAGTCACCACCGAAGCATTACTTAATTAGTTAATTATTTCCTTAATCTCAAGTGACAACTTGGATGCTTGCACTAATTGAGCTGAATTCCTTAAATCCTAAGGATTAACAATTATTTAATTCAGGGAGTTAATATGATTTGCTTCAAAAGAGG	TAATTAAAAAACATCAAGGAACACGTACAAGTTTGTATCAACGTTTTTCATAAAAAGATTGTTGCATGGTGACCATACAATGAGAATGAAGAAAAGGCCAATATATGATAAATAATGAACGTTCGTCATGCGTTACGTTACCCGGAGACAGAAGAAGGTTAGGCAAGGAGCATGATTTTGGACCATAAAGCATCAGACAT	TGACAACTTGGATGCTTGCAC	59.662	21	97.6	100	TGGTCACCATGCAACAATCT	57.709	20	100	85	188	299	486	GTGACAACTTGGATGCTTGCA	59.662	21	97.6	100	TGGTCACCATGCAACAATCT	57.709	20	100	85	189	298	486	GACAACTTGGATGCTTGCACT	59.389	21	100	100	TGGTCACCATGCAACAATCT	57.709	20	100	85	187	300	486
PolynSSR_423	AAT	4|AHLA_contig_70942:2182-2593|+	N/A	5|TWXB_1.clean_(paired)_contig_118117:3495-3509|+	0.5	0.33	0.99	TCATCTTTTAAATCATGTAATGTAATCGAAACCATATTCATACAGAACATCCACCGAACCTCTCCCCTCCGAAATATGGGCATGATATCATCTTCCACTTCAGATTCATAGTCCAAAGAAATCAACTCCTATAAGACAACCAACAATAATTAGATCAAACAAACACAGCAAGATAGTCATTTCTTCTGAAAATTTAAAAA	AAGGGAGTCAAGGAACTGGATAAGTGATTACATGCCAGGGCATACATAGCAATGTGGTTTAACATGCTCCTTAAGAATTCCCAAATATGAATCATTAACATAAAACTTGGCAAGGTCTTCCTTTCTCTGAAACCTCATATAAACCAAATGAGTAATATTATCAACATTCAATTCCTCCACACCACCTGCACATCCAATAT	CCCCTCCGAAATATGGGCAT	59.594	20	100	100	GCCCTGGCATGTAATCACTT	58.232	20	100	100	190	263	452	CCCCTCCGAAATATGGGCAT	59.594	20	100	100	ATCCAGTTCCTTGACTCCCT	57.649	20	100	100	170	263	432	CCCTCCGAAATATGGGCATGA	59.926	21	100	100	GCCCTGGCATGTAATCACTT	58.232	20	100	100	189	264	452
PolynSSR_424	AAT	4|AHLA_contig_71480:1853-2264|+	3|SCEM_1.clean_(paired)_contig_145471:1615-1623|+	4|TWXB_1.clean_(paired)_contig_14846:2479-2490|-	0.47	0	0.8	ATGCAAATTTCTCCCTTTTTATTATTATTATTGATGATCATTATAGATGAACGAAAGGTTTAATTTTATTTATGGTTCAGCAATATGCAACTAGAATTCTAACTACAATAACAACATTACATGGGAATTTCAGAGAGCATGATAGTAAATTGAAATGAGAAACTAGTTCATGTTATATATCAAGATTGATCAGATGCCAA	GAAGAATCTGATTCTTATAAGCGTTGGACTCGCTCAATGTGCTAGTAAATATGCAACTCTTTCAAATATCATGTTCTCATTAGACTGTCATTACAATGAAACAGTAAGACCTCTAAAACAGAATGATGAAAACCAAAGCAAGGTAAATTGAAAAGCTTGATGCATAGTCCTCAAGCATGGAACACGCTGAAATGGAGAAT	ACATGGGAATTTCAGAGAGCA	57.273	21	100	100	AGCACATTGAGCGAGTCCAA	59.965	20	100	100	137	318	454	ACATGGGAATTTCAGAGAGCA	57.273	21	100	100	GCACATTGAGCGAGTCCAAC	59.833	20	100	100	136	318	453	ACATGGGAATTTCAGAGAGCATG	59.048	23	100	100	AGCACATTGAGCGAGTCCAA	59.965	20	100	100	137	318	454
PolynSSR_425	AAT	4|AHLA_contig_75636:189-600|+	2|SCEM_1.clean_(paired)_contig_101067:249-254|-	N/A	1	0.33	0.7	GTAACAAATAGTGTACATTGGTATTGACATAATGTCAAAATATGTTTTAAAAAAATGACGTTTAATAATTGTCATAAAAATATAATACTTTGATTGTCAGATAGTTTATGATGCTTGTATGTGACATTTTCAACTATCGTCACTAATAATATTTCACAAGTACTTATATTTTAATGATAGTTACACATGCCACAAAAAAA	TAAGACATATATGACGAAACCAAAATTGTAATAAATGATGGACAATAGCATTAATGGCATAATGTCAAAATCTATTTAAAAAAAAGACGTTATATAACTATCACAAAAAATACAATATATTGATCACGAGATGAGAATGTCGCAAAATATTGTTAGTGTCACTAAAAATATTTTCCTCCATCTCCGATATTTGGCGCCAC	TGATAGTTACACATGCCACA	54.376	20	100	80	TGCGACATTCTCATCTCGTG	58.087	20	95	100	182	362	543	TGATAGTTACACATGCCACA	54.376	20	100	80	GCGACATTCTCATCTCGTGA	57.805	20	95	100	181	362	542	TGATAGTTACACATGCCACA	54.376	20	100	80	TTGCGACATTCTCATCTCGTG	58.738	21	N/A	N/A	183	362	544
PolynSSR_426	AAT	4|AHLA_contig_83181:2911-3322|+	6|SCEM_1.clean_(paired)_contig_21616:6853-6870|+	N/A	1	0.33	0.98	GCCAGAAACAAGAAAGTCAACACCAAACAGAGTACTAGTTGCAAATTAGTTTGATGTTTTCCACCTTTCCAATCCATTCCTTTTCTCAAGTCATCCAAACTCTACATTGAATTCCAGAATGTTTGAGAAGTCAACAGCAGGGCTGGGGGGTTTAGGGTTTGCAGTGAAATGAAGAAAAGAATTAGAGGGATTGAATGTAA	GATAATACTTAATTTCCCAAGTATAAGATTGCAAACACAGTCATTCCTATACAAACGCAGCCTATAGAAAAGAAAAGGAGCAAAAGGGGACCTGGAAATCTAACTATCTTTCAGCAATCACACATCAGATACCATTTAATAAAAGAAGCTTAAAAAAATCTCCATGCTATATAGCAAGAAAATCAAAGAAAAGAAGCAGA	GGGGTTTAGGGTTTGCAGTG	59.034	20	100	100	TTCCAGGTCCCCTTTTGCTC	59.888	20	100	100	163	346	508	GGGGTTTAGGGTTTGCAGTG	59.034	20	100	100	CAGGTCCCCTTTTGCTCCTT	59.887	20	100	100	160	346	505	GGGGTTTAGGGTTTGCAGTG	59.034	20	100	100	TTTCCAGGTCCCCTTTTGCT	59.439	20	100	100	164	346	509
PolynSSR_427	AAT	4|AHLA_contig_86699:1440-1851|+	4|SCEM_1.clean_(paired)_contig_58970:1333-1344|-	2|TWXB_1.clean_(paired)_contig_92097:2617-2622|-	0.94	0	0.98	AACTAAAGGAATGGTTGATGAATGCTGCTCTTCACGCATGCATATGTGGTTCAGTGTTCTCAATAGTTCCTTGCATGCAGTGAAACCACCACTAAGATCCTTCAAAAGTTTCTTATTTCTTCCAATTCTACTCCTGGAAGTGGAGCCTTCAGTACATGTGTTAATCTGCAATTTATGAGGAAAGGAAGATATTGTGAAAA	CAGGGAAGTAGCCCAGGTGAAAGTCAAACATGCTTGAGAACAATGAACCTATATACGTTAGTTTGAATTAAAAAGCAGAGAGGGGATGAGACAATAAACATGGGAAGTAGTAGTTCAAGAGATATGGGAACTTTGATCATTATTTCACTACACAAGCAGTTCATCTAAGTGCTAAGATATAAAAGCTAATGCGAAAGCAA	CCTGGAAGTGGAGCCTTCAG	60.036	20	N/A	N/A	TTCACCTGGGCTACTTCCCT	60.179	20	100	100	101	332	432	CCTGGAAGTGGAGCCTTCAG	60.036	20	N/A	N/A	TGTCTCATCCCCTCTCTGCT	59.662	20	100	100	173	332	504	CTCCTGGAAGTGGAGCCTTC	59.748	20	N/A	N/A	TTCACCTGGGCTACTTCCCT	60.179	20	100	100	103	330	432
PolynSSR_428	AAT	4|AHLA_contig_90196:630-1041|+	N/A	5|TWXB_1.clean_(paired)_contig_6341:767-781|+	0.5	0.33	0.99	ATTATCATTAAGTAGTGAAATTGATAATCTTAATGGTGTATCAATGTTCCTTTTCAGGATATCATGTAGTTGGCCAAACAAAAATATTACATTCAAGATTGATGAGGCAAGCAACTTCCCAGGTTATTTGGCATTTCTGATAGAGTATCAGCAAGGAGCTAAGGACATAACTGCTGTTCAACTCTGTGAGGTAATAGATA	TACTCACCAAGCATATTCTTTGAACTAGCATATAATATATATACACCATAATAATTCAACCTAAAAAAGCTTATGTTTGATTTGGTGATTTGTGGTGTCTATAGACTGTGAATTTGACATGCAAGCTGCTGAACCGGAGCTATGGAACAGTGTGGACAGCGACTCCTCCTCCTAGTGGGCCATTGTTGATAAAGATGCTT	TGCTGTTCAACTCTGTGAGGT	59.514	21	100	100	TTCCATAGCTCCGGTTCAGC	59.822	20	100	100	188	371	558	TGCTGTTCAACTCTGTGAGGT	59.514	21	100	100	CCATAGCTCCGGTTCAGCAG	60.532	20	100	100	186	371	556	CTGCTGTTCAACTCTGTGAGG	58.858	21	100	100	TTCCATAGCTCCGGTTCAGC	59.822	20	100	100	189	370	558
PolynSSR_429	AAT	4|AHLA_contig_96106:936-1347|+	N/A	3|TWXB_1.clean_(paired)_contig_179284:348-356|-	0.5	0.33	0.98	ATTGTTGTTCCTACTACCTACTCCATTTGGCCGGATCATTAAATGAATATCTTTAATTTCCCCCTTTCTTTTCTTTTTTAAAACTTTTTGATCATTAGATAGCATTTGATGAAAGACTGTTACATGCCATGATTTTGGTTATTTGAATCTATTAAAGTCATTAAAGGGATTGTTCATCTACATTTGAGATAATTAAATAA	ACAATATAAAACTATATCATGGCATGCATTCATAATTATCCTAATGCACAATCCAATTATTTAAGGATTATCATAAGTTTTGAATAAATAGATTTGAAGAGTTTGTTAAACGTAAGTATTTTATACTTTGTTTTTTTTATTATTATAATGAACTTATGGGGTTTGGATTGAGGTAATTAATGGACACGGCAGGAATGAAA	Primers not available
PolynSSR_430	AAT	5|AHLA_contig_105973:817-1231|+	5|SCEM_1.clean_(paired)_contig_114099:1320-1334|-	6|TWXB_1.clean_(paired)_contig_147765:1187-1204|-	0.47	0	0.99	CAGCCTGACTAAGTCCGTATCACAAACGATACTTTCAACTTCATTAAGGTTCTCCAATAACAATCCTAGCTCTGAAGAGTTGCTAGTAGCTTCTGATGAAATGTCAATTACTGTCATTTGTTCATTTGCATCATGAGTACTTCTTCGGATATTTTCACTGATGTTTCCCTGAAACGTACGTAGAGAATGAAGTGTGTTAA	AAAGAATAGGATTTTTTCGCTGTCATTTATTCTTCACCTCTTTAACTTTGTTAGATATGTCTCCGGTGATAATTCTTTTGTCTCCACAGGAACACCCATAAGCTGTCGATGCATCCTTTTCCCGGATTTCGTTTTCACTTCCCTCTAAAATCACATGTAGAGTTGATAATTTTGCAGAACAAGAAACTCTGCTCCTTACT	TCCCTGAAACGTACGTAGAGA	57.942	21	100	100	CCGGGAAAAGGATGCATCGA	60.464	20	94.4	90	175	365	539	TCCCTGAAACGTACGTAGAGA	57.942	21	100	100	TCCGGGAAAAGGATGCATCG	60.464	20	94.7	95	176	365	540	TCCCTGAAACGTACGTAGAGA	57.942	21	100	100	GGGTGTTCCTGTGGAGACAA	59.528	20	100	100	147	365	511
PolynSSR_431	AAT	5|AHLA_contig_11426:977-1391|+	N/A	4|TWXB_1.clean_(paired)_contig_100202:520-531|+	0.5	0.33	0.97	CTCTTCCCCGAACTACTAATGATCTCACTCTGTCATGAGTCTTGTTCTTATTTCATGTTCTTTGGGGGAGAAATGTGGATATGCCAGATATCTTTGTTTTGCTTTGTAATTGGCTGTTGCTTGGCATGCATTTCTTTCTTCTTTTCCCTTCATTTGGAAACCTTCAGGTTTTGCAAGTTAGTAATGTGTTATTATCTAAA	AACATGCGGAATGACAACGGAATTGATTTTGTAACTTGCAAAATTTGTTTCATGTAATCTTTTAAGGTGGTTTTGCATTCACTTTCTTGAAATGTTTGTTGTATAGTTAAAGCCCATCTTGGGCTTTCACAAATGTTTGTGTGTGTATATATATTACCTAGAAAAATTCATTTTATTTTGATAAAATAAGTAGTTATGAG	ATTGGCTGTTGCTTGGCATG	60.037	20	100	100	TCCGTTGTCATTCCGCATGT	60.321	20	100	100	128	308	435	ATTGGCTGTTGCTTGGCATG	60.037	20	100	100	TTCCGTTGTCATTCCGCATG	59.198	20	100	100	129	308	436	GCTGTTGCTTGGCATGCATT	60.672	20	100	100	TCCGTTGTCATTCCGCATGT	60.321	20	100	100	124	312	435
PolynSSR_432	AAT	5|AHLA_contig_140910:709-1123|+	3|SCEM_1.clean_(paired)_contig_1688:2774-2782|+	N/A	1	0.33	0.75	CAATGAATAAGACAGGTCAATAATCAAAAAAACATAATATTTAATTTATAAAAAGGATAAATATCTACTCCATGAAATAATTTAGGTTATAAATAATAATAGAAAATATTGATTGTGGATCACATAATAAAAACCATCTTTTAAAGTGTTTAGATGGTTTTTCTTGTTTTTAATTAATTATAATATATCAGTTTATTCAA	TTATGAATATCCATTTATGTCATAAGAAGACAAAATTATTTATTGAATTTGATTTTAATGGATCCTTTTCTAATGTGACACTTGACCCACATGTAAATCAATTGGAAATATCTACTTTACTAAATTTGATTGAACATTTTCAATTGGAACAACACACATTAAATTCCTTATTAATGAAATAGTTGCCCATATGTAAATCA	Primers not available
PolynSSR_433	AAT	5|AHLA_contig_30443:2452-2866|+	6|SCEM_1.clean_(paired)_contig_38998:349-366|+	N/A	0.5	0.33	0.98	AGAGAACGATGGGGAGAAAAAATTAAAGAGAATATGTACATGCAATTCAATTTATGTACACATAAGTGTTGTTATGTAAATAAGGCACTTGAATTTAAGTCCAAAAAAGGCTGAGGGGCTGTAAATAATAATTTCATAGTTTTAGCCTCTCAGGAGTGTCATTATATGAGTTCACTAGCAAGTCTAATTTATGTTACAAA	ATGAAAAATAAAATATGCATGAGATTTAAATATTTAATGCAACACCAAGTTGTTGATAAGTGAGCATAAAGATGATTGAATACCATGCAAACTGTCCAGATTCAATTATTCAAAGGGGAAATATTCTGATAATATTAGCATATAGTTTCATTTTTTTTGTGGGGAGGAATGTGCCATTTGCTCATGCCTTTTTAGGGTTA	AGCCTCTCAGGAGTGTCATT	58.05	20	100	100	ATCTGGACAGTTTGCATGGT	57.408	20	100	100	173	343	515	AGCCTCTCAGGAGTGTCATT	58.05	20	100	100	TGAATCTGGACAGTTTGCATGG	59.179	22	100	100	176	343	518	AGCCTCTCAGGAGTGTCATT	58.05	20	100	100	GAATCTGGACAGTTTGCATGGT	59.178	22	100	100	175	343	517
PolynSSR_434	AAT	5|AHLA_contig_35473:444-858|+	3|SCEM_1.clean_(paired)_contig_77051:3681-3689|-	5|TWXB_1.clean_(paired)_contig_82155:1174-1188|+	0.94	0	0.98	CTCCGCCGGAGCTCAGCATCAGTTCCAAGGAGTTGAACTATGTGAGCAGCTCTTTTCTCCACACTTCCCTGAATGAGGAGCAACACATTTTTTAAGTAAAAATCAATCCTAAGTGATTTCAGTTCTTGTGCAATTCAACATAAAAAACAAACAGACAATGATCCAAGCACACACAAATGAATAAATGCAAAAACAATAAC	GATTCACAGTAATTTCGGATTACTTGTTAGCACTGTTAAGGAAAACAAGAAATTCATAAATAAGTTGACCCTGTAAGCATTGTAAAGTGACAACAGTTGGTAAATTTTATCCGAATAGCTGGTAACACATCCCTGGTAAGAAATTTTATCAAAATATTGATTGCATGCATGAGTTTAAAATTTAACATACCAATTACCAT	GACAATGATCCAAGCACACACA	59.446	22	97.75	100	CCAGGGATGTGTTACCAGCT	59.379	20	100	100	198	353	550	ACAATGATCCAAGCACACACA	58.415	21	97.6	100	CCAGGGATGTGTTACCAGCT	59.379	20	100	100	197	354	550	CAGACAATGATCCAAGCACACA	59.184	22	100	90.91	CCAGGGATGTGTTACCAGCT	59.379	20	100	100	200	351	550
PolynSSR_435	AAT	5|AHLA_contig_43297:2370-2784|+	2|SCEM_1.clean_(paired)_contig_114051:152-157|+	N/A	1.5	0.33	0.66	ACCAAACTTCCGAGTGCTGTCTCAACAACAGCGGAGGGCTTATTGTCATGGCCATTGGCTGGTTTTGCTGGTTCTGAAGGTTTATCAAGCACTGCATCTGTCTTGGCCTTCTTTGGTTGAGATTTTACTGAGATGATTAGGTTGCCCGGGCGAGCATTTGTGTTCCTCTTCAGGACAGGCTTTTGCTCCTGACAAGGAAA	AAAATTAAAGAAACAACAATGTCGTTCTAGTGTTTTCATACAAATGCTAAACAAAGAGATTAGAAATAGTAAAATAAGCAGCTCAGAGCTTAAACTAAATTCCATGGTGATGTATGTTTGCCACTGGAACAAACTTGCGCATCAACTATGAACATGCTAGCAAATGCGGTAGAAAAAACTAACCTCAGGTCTAGAAACCG	CAGGACAGGCTTTTGCTCCT	60.251	20	100	100	TGCGCAAGTTTGTTCCAGTG	59.9	20	N/A	N/A	186	370	555	GGCTTTTGCTCCTGACAAGG	59.4	20	100	95	TGCGCAAGTTTGTTCCAGTG	59.9	20	N/A	N/A	179	377	555	CAGGACAGGCTTTTGCTCCT	60.251	20	100	100	GCAAGTTTGTTCCAGTGGCA	59.541	20	N/A	N/A	183	370	552
PolynSSR_436	AAT	5|AHLA_contig_49104:1586-2000|+	7|SCEM_1.clean_(paired)_contig_48748:1145-1165|-	6|TWXB_1.clean_(paired)_contig_136250:337-354|+	0.82	0	0.99	AAACTTTACAGGCAGGTAATATGCAGGAAAATATCCTCGACTCCAGATCCTCCTAGTTAGTGTCTTCATCAAAACAATCAGAATGACACATGAGTGGAAAAAGGAAGCAAGCTGAAAGGGAATAGAATTTGAAGGCGAAGTTCAATAGAAACAGAATATTAATCTTAAACAAATGATCATATGGCTAGATTTGATTTAAA	TAATGCATACTAGGCTTGAGAATTATTTGTGGATGGGTGATGGCCATTCAATGTAAATATAAGCTAAACTGCAAAATTGTTTATCCTACAAAGAACTATGATCATGAAATTCTTGTTAAGAAAACGTTCTCACTAGAAAGTGCAAAACTGAATCAAGCTGAAGGTCTACAATGATCTGATGAATATTCACAATTTGAGGA	AGGAAGCAAGCTGAAAGGGA	59.226	20	97.5	100	GAATGGCCATCACCCATCCA	60.106	20	97.5	100	163	301	463	AGGAAGCAAGCTGAAAGGGA	59.226	20	97.5	100	TGAATGGCCATCACCCATCC	60.106	20	97.5	100	164	301	464	AGGAAGCAAGCTGAAAGGGA	59.226	20	97.5	100	AATGGCCATCACCCATCCAC	60.398	20	97.5	100	162	301	462
PolynSSR_437	AAT	5|AHLA_contig_50561:729-1143|+	7|SCEM_1.clean_(paired)_contig_97945:784-804|+	N/A	1	0.33	0.99	AGTGGGTCCTTCTCCATGCAGTAAAAAAGGAGCTGAAGCCTCCATCATTCTATAGTTGTTTGTTGCCTCTTCAAAAGCTGTGAGCTGAATGTGATTGGTTGGGTGCACAGTTGGCAGTGGCTGTGACTGTCCCTCCAATTTCTAGCATTTAATGCCCACTAATTCATCAGTATCAATTACCACTCATCAAAAAGACCAAA	AAAAAAAAGCCACAAGGTTGGACAAACCTCCAGTTGATTAATGTTGCCATCAAAGTCTATTCCCAAGTTGTACAATATGGGATTTAGTGAGGCCAGCTTCATGGACAGAAACTGTTTATATTTCAACAAAGCTTTCATGAGAACAGAAATGTGGATGGATGCAGAGGTTAAGTGAACCATTACTGTAGATACAAAAGCAA	GCTGTGACTGTCCCTCCAAT	59.674	20	100	100	GCTGGCCTCACTAAATCCCA	59.744	20	100	100	193	319	511	GCTGTGACTGTCCCTCCAAT	59.674	20	100	100	CCATGAAGCTGGCCTCACTA	59.457	20	100	100	200	319	518	GCTGTGACTGTCCCTCCAAT	59.674	20	100	100	AGCTGGCCTCACTAAATCCC	59.451	20	100	100	194	319	512
PolynSSR_438	AAT	5|AHLA_contig_50887:59-473|+	4|SCEM_1.clean_(paired)_contig_103863:2116-2127|-	N/A	0.5	0.33	0.99	CTATGGGTCTGCCGATATACCATTCAATAGCAAGCCACTGTGCTAAACAGAAGTTGTTAAAACATAAAAGTTTAACTAATTGGACCTACAGAGATTTTCCCAAAACATTAAAAAAATGAATATGACATCTTGGTTGAAGACAACCATTTATCCAAAAGAGGGATTCCATAGCTATAGAAAAATCTACATTGTTGTGATAA	AAACAAAAAAACTATATAAGTCATAAAAAAATATCCTCACAAATTTGTCGTCATTTATTTTTTATTAATATTATTGTTATTATGAAAAAGTAGATAAACCACATGTATTAAAAGAAAAATGGCTACAAAAGATCCACTAAATGTGAAAGAAGAATACATGAAAAACAAAATAAAAAAAGCAGAAGAACAACAAAATAAAA	TGGACCTACAGAGATTTTCCCA	58.473	22	100	81.82	TGACGACAAATTTGTGAGGA	55.23	20	100	100	188	138	325	TCCAAAAGAGGGATTCCATAGCT	59.212	23	100	100	TGACGACAAATTTGTGAGGA	55.23	20	100	100	118	208	325	TGGACCTACAGAGATTTTCCCAA	59.086	23	100	78.26	TGACGACAAATTTGTGAGGA	55.23	20	100	100	188	138	325
PolynSSR_439	AAT	5|AHLA_contig_52734:2767-3181|+	5|SCEM_1.clean_(paired)_contig_118794:591-605|+	4|TWXB_1.clean_(paired)_contig_108391:503-514|+	0.47	0	0.99	ACTAAGCATTTATATATTTGCAACCAAAAAAAAAAAAACAATATGTACAAATTGAAGAAGAAGGTCGTGAAAGAAATAATTAACCTGTTGTTCGGGAATTTGATCCTTCAATTGAGAACGAAGGTCCTGCATGACAAATGCAAAATATTTCAGATCTACAAAACATCCACCAGCACAATCCATTTATCTAGAGGCTTATA	AAAAAAGAATAGGAATAACATAAATTCAAAATGAATTTAAAATAGCAAATGCACACAGTCAAACTAGGGGAAGCAATTCATGCTAGCAGGTAATTAAGCAGTTAGAGTGTACACGAAGGTATTAGGGAGATGAGTCCAACACAAACACTAGCACAAAAGGACAAACTAATCATGCCAAAATTCTAAAAATAAACATGACA	ACGAAGGTCCTGCATGACAA	59.604	20	100	100	TCCCCTAGTTTGACTGTGTGC	59.928	21	100	100	169	317	485	AACGAAGGTCCTGCATGACA	59.604	20	100	100	TCCCCTAGTTTGACTGTGTGC	59.928	21	100	100	170	316	485	ACATCCACCAGCACAATCCA	59.595	20	100	100	TCCCCTAGTTTGACTGTGTGC	59.928	21	100	100	124	362	485
PolynSSR_440	AAT	5|AHLA_contig_5421:7066-7480|+	6|SCEM_1.clean_(paired)_contig_81964:2254-2271|-	5|TWXB_1.clean_(paired)_contig_49016:642-656|+	0.47	0	0.99	GAGGAGCCACAAAGCTAACGACTGGTACAATTTGATCCATATCAACACTGCTCAATATTAAATGGGACAATTATCTTTCTTTAACAAGAAAACAAAAAATTAATTCATGTTGATAGCCTCCAACTCATTTGATTACAAGGACTACAATCATTTGATAATAAGCATCCTACAAATTCTTTTTCAAAGAACATTTCTTAAAA	TTTGTTGCTTAAAGACAAATGCAGTAACTAATGTGATGCCATCAATTTTATATAATGAATGTGAAACATTAGACTCAAGTGTTCCTGAGCGTTCCCGAACGTTTTTTCCCTCATTTTCTCCCTGTGTCTTCCTGATGGCTCCTTCGAATCCCCAGCTCGTCCGCCTCCTCATTGTTTTGGAACCAAGAAGGGTGTTTCTT	TGTTGATAGCCTCCAACTCA	56.159	20	100	100	ACGCTCAGGAACACTTGAGT	59.247	20	100	100	200	307	506	TGTTGATAGCCTCCAACTCA	56.159	20	100	100	CGCTCAGGAACACTTGAGTCT	60	21	100	100	199	307	505	TGTTGATAGCCTCCAACTCAT	56.71	21	100	100	ACGCTCAGGAACACTTGAGT	59.247	20	100	100	200	307	506
PolynSSR_441	AAT	5|AHLA_contig_56121:559-973|+	7|SCEM_1.clean_(paired)_contig_40780:1130-1150|-	4|TWXB_1.clean_(paired)_contig_109214:410-421|+	1.25	0	0.98	AACTATATGAACGTCAAAATCTTAACAAAACCAATGTATATATCGAATCCAATTCGACACTATATATACTTTAACATGGTTGAGTGAAACAAAGAAGATAGTTTTTCAATTCTATATTCTAACATATAAGCATTGTCGTAAATTGATATAGAACTAAACTGTGGTATTGCGAAAGACCACTCACAAAGGAGGTGAGCCCA	TCTCACAAATTTATGTGAGAGCAATTTCTCAGAGCAATACATAAGGGAACTTAGAAGTGCATGCACATGTGGAGCAGAAAGGAGAGGCCAAACTCAAAGAATAAATTTCAATCAAAGTTGTGAGGAAAATATGGAAGCCTTAAATATCTGGCACTTGCCTCGGCAGAAACCTTCCTTTTCTCCTCCAAATCAGCCTTATT	CACAAAGGAGGTGAGCCCAA	60.179	20	97.5	100	TTGGCCTCTCCTTTCTGCTC	59.674	20	100	100	125	381	505	CACAAAGGAGGTGAGCCCAA	60.179	20	97.5	100	GCCTCTCCTTTCTGCTCCAC	60.392	20	100	97.5	122	381	502	CACAAAGGAGGTGAGCCCAA	60.179	20	97.5	100	CCTTTCTGCTCCACATGTGC	59.475	20	97.5	100	116	381	496
PolynSSR_442	AAT	5|AHLA_contig_67513:1125-1539|+	6|SCEM_1.clean_(paired)_contig_7215:664-681|+	N/A	0.5	0.33	0.99	ATATTAAATAAATTAAATTTCCCCACCTCTTCTTTTCTCTTGATTCAAAGAATTTAAATGGAGAGTTGTATTATTATTATTATTTAATGAGAATTTTCTAAAATAAGTGGAAATAAAATAAAGGTAAACTAAAAATGAAAAACCTCAGCCTCTCATGATGCACAATGAGAAATTTCTTTTGATTGACACATACAATTAAA	GAGAGTTAAAAAGTCTACATATTTTTTTGTTTGTTTTGTCTCTATTTGTAGACAGACTATCAGTTTTGGCCTTATAAGAAACACTGTAATAAGTTTCACTTTGCAAAGATATCAATGCATTTACATGTGTTCATGTCTTGTGGTATATATATGGAACATTTCTTATCAGTTTTGGAACAAACAATGAGCATCGTATAAAA	CCTCAGCCTCTCATGATGCA	59.531	20	100	100	AGGCCAAAACTGATAGTCTGTCT	59.415	23	100	100	145	342	486	ACCTCAGCCTCTCATGATGC	59.531	20	100	100	AGGCCAAAACTGATAGTCTGTCT	59.415	23	100	100	146	341	486	CCTCAGCCTCTCATGATGCA	59.531	20	100	100	GGCCAAAACTGATAGTCTGTCT	58.056	22	100	100	144	342	485
PolynSSR_443	AAT	5|AHLA_contig_69473:553-967|+	6|SCEM_1.clean_(paired)_contig_39422:2533-2550|+	N/A	0.5	0.33	0.97	TCTTTCACCTGTGATTAATCCAACAGCTTGCTCAACAAAACTTCAACTATGTAGCATTAACAATGGCGCAATTGTTAATAATATGGGTTGTTTCTCTTCTTGAATTACAACCATTGAGTTTCCTTAGCCATCATCATGACCAGATTTGATCTTTTGTCATGCTTTTATATGATATCTTTGTGTTATTAATCTTTTGAAAA	TTCATTCCTTTAGTTAATGAGTCCAAGAAATTAACTTTATGGTTCCATGTAGGTGCTGCTTATTTCCATTATTACTGTTGTATTCTCTTATATTTGAATATATTCATAATAAACTGAGTTTCTATTCCAACCTAGTCATCAATTTCACAACTTGTTCCTCTCATATGTATATATGCCAATATGTTGTTATTAATTGTTTA	TCCTTAGCCATCATCATGACCA	58.952	22	100	81.82	AGCAGCACCTACATGGAACC	60.035	20	100	80	155	320	474	CCTTAGCCATCATCATGACCAGA	59.928	23	100	86.96	AGCAGCACCTACATGGAACC	60.035	20	100	80	154	321	474	TCCTTAGCCATCATCATGACCAG	59.928	23	100	82.61	AGCAGCACCTACATGGAACC	60.035	20	100	80	155	320	474
PolynSSR_444	AAT	5|AHLA_contig_79100:2694-3108|+	N/A	4|TWXB_1.clean_(paired)_contig_11981:3960-3971|+	0.5	0.33	0.99	AATAACATTTTTGTGTAAATAAACAAAATTATCTTTGACGTATAGAGAGAAATCTTCAACCATTTCACATGCGTGAAATATTAATTAAAATAATAAACTCGGTGTTTTATCTTGTTGTTAGCAATTAAACTTTTTCTCTTGAGCCTTGGATTCCATGATCAATAAAGATAAATGAAACCCTAGATAACCGAGACAGACAA	AAACTTAATTTATTATCGTATCATACCCACCTCTATCATTACCTTCCCATATGATTAATTATCATGTGATCAATATGATGAAATTAATCAATATGAGATGATAGCATTATCCTATTGACCAACCAAACAAAAGATAAGGGTAAAATTCTTATCACGTCCACCTTACGTGTCCTTAATCATAAAAATATATCTACACTTAG	TCTCTTGAGCCTTGGATTCCA	58.731	21	100	90.48	GGAAGGTAATGATAGAGGTGGGT	59.025	23	100	100	128	334	461	TGAGCCTTGGATTCCATGATCA	59.489	22	100	100	GGAAGGTAATGATAGAGGTGGGT	59.025	23	100	100	123	339	461	TCTTGAGCCTTGGATTCCATGA	59.422	22	100	100	GGAAGGTAATGATAGAGGTGGGT	59.025	23	100	100	126	336	461
PolynSSR_445	AAT	5|AHLA_contig_79333:362-776|+	N/A	4|TWXB_1.clean_(paired)_contig_84598:1221-1232|+	0.5	0.33	0.99	TTTTGTTTGGGTTTTTGAATTAGATATTAGAATTTTGGGAGAAATTAATAGACTTAAAAAAAATATATGTTTTAATGTCATATAAAACATTTTTTAAATGAAATGATGATTTAGTCCTTGTGAGTTAACGGCATTAATGGCTTGTTGACGGTTTGTATCTTTTTTGCTAGATAGAGAAATCACACAGATTAAAAACCAAA	AAAACTTTGTACTTCTTTTTTTGCAAATCGGTCAAAATACGAGGTTTATTTTTGTAATTTTCCCCTAATATTATTGTCCAAAGACTTGATAATAATGTTGTGATGGGGTTTTTCATTGTTTGAATTTGTTTGCTTATCATTTTACTATTTAATTTTGATGTGAACATGACTGTTTCTTTATTTTTCTTCTTTATCCAGCT	ATGGCTTGTTGACGGTTTGT	58.601	20	100	100	CCTCGTATTTTGACCGATTTGCA	59.874	23	100	82.61	123	336	458	ATGGCTTGTTGACGGTTTGT	58.601	20	100	100	ACCTCGTATTTTGACCGATTTGC	59.874	23	95.7	100	124	336	459	AATGGCTTGTTGACGGTTTGT	59.246	21	100	100	CCTCGTATTTTGACCGATTTGCA	59.874	23	100	82.61	124	335	458
PolynSSR_446	AAT	5|AHLA_contig_80265:350-764|+	4|SCEM_1.clean_(paired)_contig_123461:541-552|+	N/A	0.5	0.33	0.98	CTAGTGTGCATGGTAGTGAAGGTTCAAACCTAAGTCATAAGTAAGATGACATTTTTACTCACGTGCGCCCATGACACAGGAGCCTGTTAGAGACAATATCTCATAGATGCATACCCGTAAACATACGCATTTTAAACAAATAATTTACATATAGTAGAAATATTAACAGATACTTGATGTGTGTCGCTTTTGTTAAGAAA	CATATAAATAGTTTCTTGCTATCATTTTGTCAAAATAATATTTGAAAGGTTTGTGGTTGAAGACTCTCATAAGAATTGGTGTTTATTTATATATCTTTATAAGAATGATATTTACTGGTATATTTGATAAACTATTGTCATTTGCTTATGTAGTTTTATTATAAAAAAATAATTAGTTATTTTTTAAAAAAAATTGAATA	GCATACCCGTAAACATACGCA	58.797	21	100	100	TGAGAGTCTTCAACCACAAACCT	59.8	23	100	100	176	308	483	TGCATACCCGTAAACATACGC	58.797	21	100	100	TGAGAGTCTTCAACCACAAACCT	59.8	23	100	100	177	307	483	TGCATACCCGTAAACATACGCA	60.418	22	100	100	TGAGAGTCTTCAACCACAAACCT	59.8	23	100	100	177	307	483
PolynSSR_447	AAT	5|AHLA_contig_82525:1578-1992|+	4|SCEM_1.clean_(paired)_contig_56277:3276-3287|-	6|TWXB_1.clean_(paired)_contig_138208:3195-3212|-	0.82	0	0.97	TCAAGCACATAAGATTAGCGTGATAAAAAAAGCTATCACATAGTTAACAAACCCAGAATGGGTGGTCAGTGGCCAGTGAGCTGATTAAAGAAATGGTGGGAAAGAAATATTGGAGGAAAGCATTGTGGATGCTCTTACATTCTTTTGCCTATTCCAACTTATTTCATTGGTTTTACTTGTCAATGATATCAAATTGGTTA	AACAATATAAAAATAAATAGCAAACAAGTGAAACTACAATACCAACATGCATGCACTGCTGATGTTGATGTTCAAAAGAAATACGTTTATTTAAATTTAGTCCGGCTAAATTGCAGGCATAGTTGGTTCAATTCAATAGGTTGAAACCTCCTTCGGTGATGCACCACAAACACCAACTAAGCAACAGGGAGATGGGAAAA	TGGAGGAAAGCATTGTGGATG	58.551	21	100	100	ACATCAACATCAGCAGTGCA	58.1	20	100	100	176	310	485	TTGGAGGAAAGCATTGTGGA	57.326	20	100	100	ACATCAACATCAGCAGTGCA	58.1	20	100	100	177	309	485	TGGAGGAAAGCATTGTGGATG	58.551	21	100	100	ACATCAACATCAGCAGTGCATG	59.836	22	100	100	176	310	485
PolynSSR_448	AAT	5|AHLA_contig_88289:152-566|+	5|SCEM_1.clean_(paired)_contig_16665:2205-2219|+	4|TWXB_1.clean_(paired)_contig_84172:2120-2131|-	0.47	0	0.99	AAATTAATTTATTTTTGAAGAAAAATTTATTGTGAGATTTGACTAGGGGCCGATATCTGTGTTAATATCAAAATTTGCAAATATAATTTAGAGTTGTGTGATTTCAAATTCTATTAGGGAAAAACAAATCTGCTGATTTAAAAATAAGCTCTCATGAAAATGCATTTTATAGAATTTAGTTTGCAAAATTAACATTTAGA	TACTTTCCTTTATTTTGAAAGGCATGTTAATAAAATATCAATTATAATTTGAAAATCTTGAAGATGTATATCACATATTATAACGTTATATTTCACAATATTTAAGATTTCAAAAAAGTAATGTGCAATAAAGAAAAAGATTCACAAAGAAGATTAATTGTGGACTCAAGAATTTTGTAAATGTTAAAACATGTTAGCCT	Primers not available
PolynSSR_449	AAT	5|AHLA_contig_9031:3042-3456|+	8|SCEM_1.clean_(paired)_contig_81903:3710-3733|+	N/A	1.5	0.33	0.99	TCAATTATGCAGCCTGGCCAGTTTCATTCATCTAATGGGAGTCAAATTCAGGTCTTATCATGATTCACAAATATTGAATTTTATAAATTTGAATAGGTGATCAAGGCTCCACAAAATTATTGCCTCACTCAAGCGTGTGATGCTTTCTTACTTCTTCTTGCTGCTCATGACTCATGACATGGACCATTTTGATGCAACAA	AACACAATTAGTATTTTCATTCACTGAGATATTGGCAAGCAATATAATTTCAACACAATATCAATGAAGGGCCCTCTTGTGATTCTATCACTGTTATTAATTAAAACAAAATGTGGCAACACATTGCACTCAAATTAGCCTTGCTTCTAATGATTTAGCATACCAGAAAATAGACTCATGAATAGACATCCACTGCAACC	TCACTCAAGCGTGTGATGCT	59.966	20	100	100	GAATCACAAGAGGGCCCTTCA	59.995	21	100	100	176	324	499	TCACTCAAGCGTGTGATGCT	59.966	20	100	100	ACAAGAGGGCCCTTCATTGA	58.924	20	100	100	171	324	494	TCACTCAAGCGTGTGATGCT	59.966	20	100	100	TCACAAGAGGGCCCTTCATT	58.924	20	100	100	173	324	496
PolynSSR_450	AAT	5|AHLA_contig_9215:659-1073|+	3|SCEM_1.clean_(paired)_contig_21978:1506-1514|+	3|TWXB_1.clean_(paired)_contig_6328:2092-2100|+	0.94	0	0.89	TAATGTGTGTGTATTGGTCCTAAACAAAAACTTAACTAAAACGTGATTTCCAGCAAATCCATAGTTGCAATCCAGACAATGAAAATAACACTAATATGAACATTTATACTAGCGGATTCCCCTCCAAGTCGTCCCATTCTTAGGCCCTAACATAGTACTAATTGTACGTGTGCATCAGCAGAGATAAAAGATTAATTAAC	AACAATAATCCGATGATATGGTACCAAAATTTGAACTACTAGAGCTGTTTCACTCGGTACTGATAAAAACCAAAAAATAATAATTAAAAAAAAATCCTTCTTTCTTCCCACCTTCTTGAATTCATGAATTATGTCATCCTTCATGAGATCAAAGTCGGCGTTGCGACGGCCGAGAAGGTTGATGATACTTCCAAAGTAAT	CCCTCCAAGTCGTCCCATTC	60.108	20	97.5	100	TCAGTACCGAGTGAAACAGCT	59.039	21	97.6	100	159	319	477	CCCTCCAAGTCGTCCCATTC	60.108	20	97.5	100	CAGTACCGAGTGAAACAGCTCT	60.03	22	97.75	100	158	319	476	CCCTCCAAGTCGTCCCATTC	60.108	20	97.5	100	TCAGTACCGAGTGAAACAGCTC	60.03	22	97.75	100	159	319	477
PolynSSR_451	AAT	5|AHLA_contig_93026:364-778|+	N/A	6|TWXB_1.clean_(paired)_contig_170833:559-576|+	0.5	0.33	0.97	TCACTGATTCTTGAAAACACAAATCTTTAATCACCCAAGAATAATGAGATCGGTGCATTCACTAGGATTTTTCTTTTGTAATGGTGGACTTAAATATAAAATCAGAATTTTTTTTAATTATGAATTTGTTTTTTTAAAATACATGCTTTTCTTTATTATAATCATTAACTGCATAGATGATTTATCCAATTATTTTTCCG	ATGCCTTGTTTTTAGTGAACCTGAAATTATAAATTTTTATAACAAAATAGATAAACTGAAGACTCAAGCGTGGGGTTGATATCTCAACACTTATGTACCATGTTTTTGTATGTACCCATAATAATTTATTTATTTAGCAAAAACACAAATACTCTACTCCAGCAAGGTTGGCCAAACTATAATATTTTGATGATATTAAT	Primers not available
PolynSSR_452	AAT	5|AHLA_contig_94447:566-980|+	N/A	3|TWXB_1.clean_(paired)_contig_16103:1427-1435|-	1	0.33	0.97	ACTTACCAACACTGCACGAGGTTGAATAGATTTAGATTCAATGGATTCATGTTTCATATCTTATTAATAATAAGTATATTTATATCATAATAATTGGATTAATCTAGTTAATTTTGTTGATTAAAAGTAATGTCGTAATAGGGCCCACTAATTATAGCCTGAATATATTCAAATATATTATTTATTTTATCGTATATATA	GGTATCTATGGCATCTCGGATAATGATTTTTAAATATTATTTATATCCAATTTTAATTATGTGTAGATTAAATATGACATTTTTTTTTAATTGGGAATTTGTTTTCACAGGAAGAACTCATGGCTTTGTAAAGAGGTTTAATCCATTTTCCCCTTGACCAACTTCGGAATGTCATATAGCAATCTTTTTATCATTTCATG	GGGCCCACTAATTATAGCCTGA	59.357	22	100	81.82	AGCCATGAGTTCTTCCTGTGA	59.019	21	100	61.9	200	340	539	GGGCCCACTAATTATAGCCTGA	59.357	22	100	81.82	AGCCATGAGTTCTTCCTGTGAA	59.627	22	90.9	100	200	340	539	GGGCCCACTAATTATAGCCTGAA	59.926	23	100	78.26	AGCCATGAGTTCTTCCTGTGA	59.019	21	100	61.9	200	340	539
PolynSSR_453	AAT	5|AHLA_contig_99620:2951-3365|+	2|SCEM_1.clean_(paired)_contig_53088:1126-1131|-	N/A	1.5	0.33	0.98	CAGAGGTTGCAACAGAGTTCCATCTTTTGCACACCAAACGGAGTCGGTAAAAGCTCGCAGGTGGAAGCCATGCCAGGACCTTCTCTAGCAAGTCTTCATTCAATTCATCTAAGGAGAACACAGAGATCATTTCAGCCTCTTCTGCTGCTTTTCTTTTCTTGTTTTGCTCCATCTGTTCAATACTCGACGATCAGAAAAAA	TAGTAAGCGGGATGCCAATCAGATTTGAGTTCATGGAGAAACCAAGAGAAAATGAGATCTTAAATTAAACAAGCCATGCAGGTTATTCTTAAAGCTTTCAGAAAAAAACAAAAGCTTTTCAAAAGGAAAAAAAATGTTAAAAGAGACAAAGGAGGAGAAAGGAGAACAAAGAAACAAAGAATCTGCTTTACTGTGAACTA	TGCCAGGACCTTCTCTAGCA	60.252	20	100	100	ATCTGATTGGCATCCCGCTT	59.816	20	100	100	169	270	438	GGTAAAAGCTCGCAGGTGGA	60.321	20	100	100	ATCTGATTGGCATCCCGCTT	59.816	20	100	100	194	245	438	GGAGTCGGTAAAAGCTCGCA	60.389	20	100	100	ATCTGATTGGCATCCCGCTT	59.816	20	100	100	200	239	438
PolynSSR_454	AATA	3|AHLA_contig_101806:52-463|+	2|SCEM_1.clean_(paired)_contig_124193:634-641|-	N/A	0.5	0.33	0.7	AAGAGAATTTATCACAAAGATAAGCATAACTACACACTATAGTGATCTCCAAAATCAGAAGTCCCTTTGGTTGGTGTGGCCTTTGGTGCTTCAATGTCACATTGGAGTATTCAAGGGTTTCATTGGGTGCAAAGCTTTTGACAGAGTTACCCATAGACGAAAATGAAGGATGTTAATTAGAATATAATGAAATAATAAAT	AATTGAAGCTAGCAGATGAGGTGTGGGAGCTAGCTCCAAAACCATGCTCGCATTTTGTTGTCACAGGGTGCCTGGGGCTAATGAATTGGGATAACTAGTCTTTTCAACATCTAGTTCTTTTTATTATACTCATGTTTTTTTGGTACTCGTCTATTTTTAATAAATTGAGTGATTTATTTTTTTTTTAAAATAATTCATTT	AGTCCCTTTGGTTGGTGTGG	60.106	20	N/A	N/A	GCTAGCTCCCACACCTCATC	59.894	20	100	100	187	110	296	AGTCCCTTTGGTTGGTGTGG	60.106	20	N/A	N/A	CCCACACCTCATCTGCTAGC	60.179	20	100	100	180	110	289	AGTCCCTTTGGTTGGTGTGG	60.106	20	N/A	N/A	AGCTAGCTCCCACACCTCAT	60.326	20	100	100	188	110	297
PolynSSR_455	AATA	3|AHLA_contig_104248:661-1072|+	3|SCEM_1.clean_(paired)_contig_55426:1530-1541|-	2|TWXB_1.clean_(paired)_contig_127131:389-396|+	0.47	0	0.97	CACAATTTAATCTACATCAAAGTCAAAATGGAAACTAATCTGCAACGTAGTCATAAATAGCATTACATGAGGTCAAAGGAAACATGATAAATTTCACAATTTAATGGATGATAGAAACATTGAGAAGACAAAAATCGACATCTATATCTCAATGTTCAAACTACAGTTTAATCCATACCAACAGCAAGCCTCATCAGTCG	TCATTGTCTTGAACATTGGTTCATTTATTTTAAATAAAATGGAGTTGTGTACATAATCATCAGATTGAACAGTAGCTGAAGAATTCCTAGGAGCCACACAGGTAGCCACACACCCCGTGCCGAGGCCATGTTGCTCATAGGTTGAAGTTTTTGATTTTGGCACTCTGCTACGGTATCCTTGTTACGGTATCACCTTCTTG	CAGCAAGCCTCATCAGTCGA	60.108	20	100	100	ACCTGTGTGGCTCCTAGGAA	60.179	20	100	75	134	381	514	ACCAACAGCAAGCCTCATCA	59.889	20	100	100	ACCTGTGTGGCTCCTAGGAA	60.179	20	100	75	139	376	514	ACAGCAAGCCTCATCAGTCG	60.391	20	100	100	ACCTGTGTGGCTCCTAGGAA	60.179	20	100	75	135	380	514
PolynSSR_456	AATA	3|AHLA_contig_114090:178-589|+	5|SCEM_1.clean_(paired)_contig_100514:1466-1485|+	5|TWXB_1.clean_(paired)_contig_116547:1101-1120|-	0.94	0	0.98	TATTTAATGCAAAGCTCAAAGAAACAGTTGCTTCACTAAGGAAGGAGCTTCCCCTTGCAACATTTACCTATGTTGATGTCTACTCAGTCAAGTACTCAATCATAAGCCAACCCACAAAGCATGGTAAGGATTACATTTCTCATTGTGTCAATATAAATCCTTCATTCTTGAACAGTTGATTGGTGATTATCATAAAAAAG	TATATATACTTAGGTTTTGAGCATCCGCTTATGGCTTGCTGTGGACATGGTGGAAAGTATCATTACAACATGCATGTTGGTTGTGGTGGGAAAATTAAGGTGAACGGTACGGAGGTTTTGCTCGGAAAATCATGTAAGAAACCTTTGTCACGAATCAATTGGGATGGAGTGCATTACACTGAAGCCGGAAACAAGTATGT	AAGCCAACCCACAAAGCATG	59.606	20	100	100	TTCCACCATGTCCACAGCAA	59.815	20	100	100	164	280	443	AAGCCAACCCACAAAGCATG	59.606	20	100	100	TTTCCACCATGTCCACAGCA	59.815	20	100	100	165	280	444	AAGCCAACCCACAAAGCATG	59.606	20	100	100	TCCACCATGTCCACAGCAAG	60.251	20	100	100	163	280	442
PolynSSR_457	AATA	3|AHLA_contig_117525:2027-2438|+	N/A	2|TWXB_1.clean_(paired)_contig_153837:259-266|-	0.5	0.33	0.98	CGCAATGCAGACCCTGTCGTGGGACTTTCCCGACTAACCAGAGTGAGCTTGACTAAAAAATTTCACATGGCATCTAAACTCACTATTGATCTTCTGAACAAGTGGTGGCCTATCAACACTAACTAAAATGAGGAATAATCTAAAGTTCTATCTGTTGTCGACAACAACATAGGTAATAAGAGTAGCGCCAATGGATTGCC	AAAATTTGTCGCCTTTCAAATCAAAACACAGGCAGCTAAATGAAATCAATCCACCAATGCAATCTCATCATCCATTGATTTCATCCCACCATGGAGTAGCATTCAACCCTATCTGCAAACACTACACCATCCACATAAACCCATCTCGATTGCCAAACCCCAAAAACAGAGTAATCAAAAGCACAAAAATTAAAATAAAA	GAGTAGCGCCAATGGATTGC	59.691	20	100	100	TTGGGGTTTGGCAATCGAGA	59.889	20	100	100	196	379	574	GAGTAGCGCCAATGGATTGC	59.691	20	100	100	TGGGGTTTGGCAATCGAGAT	59.669	20	100	100	195	379	573	GAGTAGCGCCAATGGATTGC	59.691	20	100	100	GGTTTGGCAATCGAGATGGG	59.259	20	100	100	192	379	570
PolynSSR_458	AATA	3|AHLA_contig_119982:1414-1825|+	3|SCEM_1.clean_(paired)_contig_16766:3818-3829|-	4|TWXB_1.clean_(paired)_contig_4525:7830-7845|+	0.47	0	0.81	AAGATAGGAACAAGCCCTTGCAAGGATGAGTTTGAAGAAATGCAAAGATACTAAGATAGGGATATCATGATTGAGAATTCATCAGCAATCTTCCATCAAGATTCTTAGTATGCTAATGCATCATACAGAAGAATTTCAAAATATCATAACTTAATCAGATCCTTTCAGATATCTTGATGAAATGCATTTCCTGCTGGTTC	AGTAAACAGAACAATAAAAAATCTAAAGCAAATAAAACCATTAAACTTCAATTCAGCCTGGTGGACACAGCAAAAAAGTTTGAAAATGGGGTCAATATTCAAGTTCAACTAGGGGCCCACTGCCATAAAAATAAATAACTCAGCAACATATAAAAAGTTTCATTACATTACCTGATCAGATTCTTTAAGCAGCCCAATTA	CATCAGCAATCTTCCATCAAGA	56.487	22	100	100	TGTCCACCAGGCTGAATTGA	59.23	20	95	100	200	279	478	TCAGCAATCTTCCATCAAGA	54.345	20	100	100	TGTCCACCAGGCTGAATTGA	59.23	20	95	100	198	281	478	TCAGCAATCTTCCATCAAGA	54.345	20	100	100	GTGTCCACCAGGCTGAATTG	59.116	20	100	80	199	281	479
PolynSSR_459	AATA	3|AHLA_contig_12128:2526-2937|+	N/A	4|TWXB_1.clean_(paired)_contig_141364:1635-1650|+	0.5	0.33	0.97	GGAAATCCACAGTTTAACAAAACATGCACAACTTTTTAGTGTTTTACCTGCAGCCTAAAGCAAAATAAATGAGATATCAAAAGTCTTTCCCTTAGAGCAAGGATTTCAGTACATAAATTTTGAAGATAATCTCTCAATACTAAACAGACGCTACCAAAATTACCGCCATTACTATGCACAATCCATTCACAGTAAAAATC	AACAAATAAATATTTTCAAAAGAAATCATAGATAGAGAACATTCACAATTAGGGTTGTAAAGAGACCATTCTGTCAAGACATGGGCATCCCATCCAAACTCCAACATGCACAAATTAGTATCTTTAACAAACTCATATATTTTTAAAAAATTTCAAGCTCCATAAACGAAAGATACATGCTGAAAAGGGGAAGGCCAATT	CGCTACCAAAATTACCGCCAT	59.326	21	100	90.48	TGGAGTTTGGATGGGATGCC	60.033	20	100	100	167	348	514	CGCTACCAAAATTACCGCCAT	59.326	21	100	90.48	GGGATGCCCATGTCTTGACA	60.034	20	100	100	155	348	502	CGCTACCAAAATTACCGCCATT	59.902	22	100	90.91	TGGAGTTTGGATGGGATGCC	60.033	20	100	100	167	348	514
PolynSSR_460	AATA	3|AHLA_contig_128243:1964-2375|+	3|SCEM_1.clean_(paired)_contig_22138:2111-2122|+	2|TWXB_1.clean_(paired)_contig_117632:2621-2628|+	0.47	0	0.99	TCTATTCATTTCCATGCTTTACGGATCACAAACTCGTGAATATTAGAATATGTTAGACTAGTCACCTCTAAGAGTTGATCTTTTCTGGGTTCATTTCGTAGGTTTTCTTGCAAATCCCTGGGTAAAATCTGCAAAACATGAATCCTTGTCATTAATTTCTTGAGCCATAGAAAGGAAAAGAATAGAAGAAGAGATAAATG	AATGCCACCAGGTTTACTTAAAACAAAACAAAAGCAGAAAGAAGAATAATATTCCGTTGTCTTATTCTTCCACTACAACTCATTATCCACTCCTCAGTGAGATTAACTTACCATGCCACTAACTACAATGACAGGCCATAGAGGTCAAGTTCCCTTGAAGTCTGTGGATTACCAACAAGGCAAACAGTAGGAGCATCTAA	GTTTTCTTGCAAATCCCTGGGT	59.631	22	100	100	AGTGGAAGAATAAGACAACGGA	57.115	22	100	100	185	301	485	TTTCTTGCAAATCCCTGGGT	57.603	20	100	100	AGTGGAAGAATAAGACAACGGA	57.115	22	100	100	183	303	485	GTTTTCTTGCAAATCCCTGGGT	59.631	22	100	100	GTTTTAAGTAAACCTGGTGGCA	57.078	22	100	100	135	301	435
PolynSSR_461	AATA	3|AHLA_contig_13388:4750-5161|+	5|SCEM_1.clean_(paired)_contig_75556:2894-2913|-	5|TWXB_1.clean_(paired)_contig_32627:1765-1784|-	0.94	0	0.65	CCACCCGTTCGACTGGGGCTCCAAAGACTTTTGCTTGTGGGGGTCACTTTGTACACCAGTTAACCAGACACGTTCTACCCACCTTACATAATAAATCTGTTGCTGTTGCCTCATACATGGTATAGCGGATTTACAAGTAACAGTCCCCAATCAAACACACGAACTTCACACATCTAAAACACCAAGAAATCAAATTAATT	AGCACAATAAACCTGTCCGGGCTAATTTAGTTCTGCACCTGGGGCCAAGAATGTATAGATCATATATCTAAAAATGTCACCATATATCAGATAGCCAACAACATCAATGCTGGCTTACAATGACCACCAGGTTATAGGAGAAATAACCTGATTAAAAGCACAAAAAAATTATTTCTAAAAATTACAGCATCCCCAAAATA	GCTGCTCGGCGATCAAAATT	59.901	20	100	100	GTGGTGTGAGTCAACTGGCT	60.179	20	100	100	139	65	203	GCTGCTCGGCGATCAAAATT	59.901	20	100	100	GAACGGGTGGTGTGAGTCAA	60.179	20	100	100	145	65	209	GCTGCTCGGCGATCAAAATT	59.901	20	100	100	AAGTCTTTGGAGCCCCAGTC	59.598	20	100	85	165	65	229
PolynSSR_462	AATA	3|AHLA_contig_134110:675-1086|+	4|SCEM_1.clean_(paired)_contig_114556:593-608|+	3|TWXB_1.clean_(paired)_contig_161812:1270-1281|+	0.47	0	0.98	GAAAAGATGCCCACCACTTATATGTACACACCAACACTTGTGAGTATCCAATATGAGACTAATTCCCAATTCATAACAAAATCCGGGCGACAAGGTCAGTTCCACCAGAATAATCCTTGAAGGAAAATGAAAATGAGGTATTCATTTTGATCTCTTGTCCTTGAATCAACTAAGTCGGTTTTAAAAAATATTCATTCCAT	AATTAATTAAATAATTTTAAATTAAAATAGTTTATATAAACAAATCGTTTTTATGTTGTCTGCGTGCTGTGGCATTTTGAGTTAAAATTTGTTTTAGATATAAAGACTGTTTGTTGTGTGATTATCTTGTGTTGCCAAGTAACTTATCATGTCTTTATTTAATATATCACAATAACTTTTTAAGTGCATGATGTTAACTT	CGACAAGGTCAGTTCCACCA	59.894	20	100	100	CACAGCACGCAGACAACATA	58.853	20	100	100	196	287	482	CGACAAGGTCAGTTCCACCA	59.894	20	100	100	CCACAGCACGCAGACAACAT	61.51	20	100	100	197	287	483	CGACAAGGTCAGTTCCACCA	59.894	20	100	100	CACAGCACGCAGACAACATAA	59.469	21	100	100	196	287	482
PolynSSR_463	AATA	3|AHLA_contig_136952:197-608|+	N/A	4|TWXB_1.clean_(paired)_contig_113785:943-958|-	0.5	0.33	0.99	TCTATATTGAATGTTTGCTGCATGAATGCATGCATGGGAAGTACGTGGTGATATAAATCATATGCATGGCTTACATCAACTGTCTTGCCAGATGGGTCTATCTGACACCGAGGCTCATTAATCAACTCCCACGCCATTATTGTAGGATCATCTTTATAAACTATCGTTGAGATGGTGTTCCTTCTTGTTAATATTTTCTG	ACAAAATCAAAACAAAAGCAAACAGCTAGAATTAAAAATTCATATTGAAAAAAAAATATCAAACAAACCATGATATGATTCTTATAATATTGTTTCACAACAGGATTAACGTAGAAATCATCTTCTCCATTCACTGCTTCTCCTGCATGTCTTGCCCACTGTACATACTGTGCTTTTCCTCCATAGTCCTTGAAGTTGTT	TCGTTGAGATGGTGTTCCTTCT	59.367	22	100	95.45	ACATGCAGGAGAAGCAGTGA	59.311	20	100	100	199	359	557	TCGTTGAGATGGTGTTCCTTCT	59.367	22	100	95.45	ACATGCAGGAGAAGCAGTGAA	59.927	21	100	100	199	359	557	TCGTTGAGATGGTGTTCCTTCT	59.367	22	100	95.45	GACATGCAGGAGAAGCAGTG	58.915	20	100	100	200	359	558
PolynSSR_464	AATA	3|AHLA_contig_142984:697-1108|+	N/A	2|TWXB_1.clean_(paired)_contig_163197:394-401|-	0.5	0.33	0.97	TGATTAGAATTTTATTCAAATTGTTTTTAGGGCGACGTGCAAATAAATTAAAAAAAAATCTAATAAAAATTTCTTCCCAATTTAATTTTGAGAGATGAACCCAGAAGTTCATATTAACTTAATTTTATAATTTATAAAATAAAAAAGCAACAATTTGTTAAAAATAATTACGAAATTGTATTTATACTAATATACTATAT	TTCAATTTTATAAATTAGGGTTTTTTCCAATTCCATTATATTATTATTCATGTCCTTTTTCAATAAAGTCACGTGCAGAACGAGTGTGTCCTTGATGACCATTATAAGTTCGAGATTCGAATCCACATTATTAAGATTCGGATCATTGGAACCTATATGATCTTTTGAAAGAATATTCCCTCTAATATAAGCCCATATTG	AGAGATGAACCCAGAAGTTC	54.376	20	95	100	CTGCACGTGACTTTATTGAA	54.272	20	100	100	200	290	489	AGAGATGAACCCAGAAGTTC	54.376	20	95	100	CTGCACGTGACTTTATTGA	53.356	19	100	100	200	290	489	GAGATGAACCCAGAAGTTC	52.658	19	94.7	100	TCTGCACGTGACTTTATTGA	55.041	20	100	100	200	291	490
PolynSSR_465	AATA	3|AHLA_contig_144149:167-578|+	3|SCEM_1.clean_(paired)_contig_121692:315-326|-	5|TWXB_1.clean_(paired)_contig_161351:1139-1158|+	0.94	0	0.98	TTTTTATTTTTTTTACAACCCCTAGGCTATGACTGAGGACTCATGACGGATGACGTAGCTGCCACCTCATTCGTGAAGCCAATTTGTGTAACCTCTTCGGATAATATAGCATTACTCTAACGTTATTGAATTTTGGATTCAAAGCTTTTACCAATGATCAGTAATCAACTGAGAAGGGTTGGAAGGTAATTTGACAATTG	AATCTAAAAAAACAATAAGGGTTTTATTCTCACGCTCTTCTTTGTGATTCCCTTGGTTCTCTTTGTTCGATCTCGAATTTCCTCTTCGTCTCCTTGGCAGCCCTAAATCTCTTCAAGGCGATGACGATGGGATCTGGAGGATCAGGCGTCGTAGGTTTGCTTCTCAAACATCGATTTCTTTCTTTGTATCTGCGACGACT	ACTGAGAAGGGTTGGAAGGT	58.179	20	95	100	GATCCCATCGTCATCGCCTT	59.966	20	97.5	100	179	333	511	ACTGAGAAGGGTTGGAAGGT	58.179	20	95	100	CTGCCAAGGAGACGAAGAGG	60.108	20	97.5	100	145	333	477	ACTGAGAAGGGTTGGAAGGT	58.179	20	95	100	ATCCCATCGTCATCGCCTTG	60.25	20	97.5	100	178	333	510
PolynSSR_466	AATA	3|AHLA_contig_2227:5355-5766|+	3|SCEM_1.clean_(paired)_contig_19065:5291-5302|-	5|TWXB_1.clean_(paired)_contig_114773:3011-3030|+	0.94	0	0.97	CATATCAAACAGCAAACTTACAAAATGACATGTGTTAAAGGAGGAAAAAGTCAGATGGGGGAGCAGATGCACATGGAATGCCTGTAGTATTGTTTGTGAATATTACGTTTAAAAGAATGCCACTAAATGTATGCATTATGACATGAATAACTAGATCACTGCCAAAGAAATATCTACATCATAAAAATAAACAAGTAAAT	CTTTCTTGCTGAGATAAAATTATGTCATAGATCTATTCACAAAGTCAAAAGGAAGGACTAAAATTACCTTGGCTGAATACAAAATCACATCATCCTTATTTAGTTTGAGAGAATGACTGCCCCCAAATGAAGCAAGATTCAGAGCAGCTCGTGGTTCTGCCTAAAGCAATGATGGAAAATGTTAAGAGGAACCTAGAAAG	ACTAGATCACTGCCAAAGAA	53.975	20	100	100	GGGGCAGTCATTCTCTCAAAC	58.912	21	100	100	186	349	534	AACTAGATCACTGCCAAAGA	53.975	20	100	100	GGGGCAGTCATTCTCTCAAAC	58.912	21	100	100	187	348	534	ACTAGATCACTGCCAAAGAA	53.975	20	100	100	GGGGCAGTCATTCTCTCAAA	57.503	20	100	100	186	349	534
PolynSSR_467	AATA	3|AHLA_contig_2413:2320-2731|+	2|SCEM_1.clean_(paired)_contig_83642:2211-2218|-	N/A	0.5	0.33	0.99	CCACCAGGTCTGAGAACTCGGTCCACTTCCATCATGTACATTCCATCTGCAAATGATGAAGTCAGGCAATTAATTTAGCAAAAGCTCCATTAAAAACACACACATACACACACATCATAATTAAACATGAAAATTTATCCATTTTTTGGTCGTAACAGAAAGTTAGAAGTTAATAAAATAGTGAAAGCCCGATGCAGAAT	AACAAACAAGACTTCACAAATAAACAACAGCTCAAAAGAAAGGCCCATAAGAACCCTCACCATTTGATCCCCATGGAATTAAGCACCTTGAACAGTGAGCCATATCAAAGGCCCTAGATGGGTAAGGGAGCTGCATGGTTCCAAGCACACCAATAACTGCCGGCACACCTCTTTCAAGAGCAAACTGCACCTGTGCCTCA	AGTGAAAGCCCGATGCAGAA	59.963	20	100	100	AACCATGCAGCTCCCTTACC	60.034	20	100	100	173	379	551	AGTGAAAGCCCGATGCAGAA	59.963	20	100	100	CATGCAGCTCCCTTACCCAT	59.816	20	100	100	170	379	548	AGTGAAAGCCCGATGCAGAA	59.963	20	100	100	GGAACCATGCAGCTCCCTTA	59.744	20	100	100	175	379	553
PolynSSR_468	AATA	3|AHLA_contig_27947:123-534|+	2|SCEM_1.clean_(paired)_contig_114426:894-901|-	N/A	0.5	0.33	0.97	CAATTAGTTTCTCTTATTTGTTTTTTTTAATATTCATGTTTTGATTTTTTCTTGGTACCATTTTATTGTGTGTGAGTTTCCAGTATTTGGTGATTAAAATAAATTCAAAATAGAAAAATCTAAAATTAAGAACAACTACTAAAGAGAAAATGACTCTGGTATATTGAAAATTAAACACAATAGTGATGTCTTAGTTTCCC	TGTATATAACTCTAAAATATGTTTAAATTTGTGATGACTTTACTTTGTGATCGTTTAAGTTTTTTGAATTAGTTCATATTACAAGGGTTTTATAGTCGAATTAAATTGAATATGAATTATAAACTTTAACAATAATGAATAAATCAAGTCATCAACAATCACGTAAAATTATTATCAAAATTTTAATTTAAATCTATCAA	AGTGATGTCTTAGTTTCCCA	53.565	20	100	100	ACGTGATTGTTGATGACTTG	54.257	20	100	90	195	303	497	AGTGATGTCTTAGTTTCCCA	53.565	20	100	100	CGTGATTGTTGATGACTTGA	53.972	20	100	85	194	303	496	AGTGATGTCTTAGTTTCCCA	53.565	20	100	100	CGTGATTGTTGATGACTTG	52.27	19	100	89.47	194	303	496
PolynSSR_469	AATA	3|AHLA_contig_31913:287-698|+	2|SCEM_1.clean_(paired)_contig_144586:2122-2129|+	3|TWXB_1.clean_(paired)_contig_152224:844-855|-	0.47	0	0.98	TTCCCATAAATGGATTAAATTCCAAATTTAGAATTAAATAAAAAAACTGTAATATTATTGCATTAAATTTTGATGTAATCATTCTTAGTTGATGGATTTGTGGGGATTAAGCTTTAGATTTGCTTTAATTTCAAAATAATTAAAGAGACCATTGATATGCCATTACCTGTCAAATAATTTAATTCCAATGACACCACCAC	ATTTAAAAAAACAAAAGAAAAAACAAAGTTTAGAAGAAAAAGTAAAGAAAAATTGAGGTGGATGACACTTCAAATAGGGACAGATCCAGATCAGCAAAAGAAAAAATATTGAGTTAAGAGAAGAAGATTAGAGAAGGATTAAGTGGACCACACCAAAATAAATGAAAATTTAATTATTTTAGTTGATCTCATGCATGAGT	ATTCCAATGACACCACCACA	57.326	20	100	100	TGCTGATCTGGATCTGTCCCT	60.344	21	97.6	100	127	381	507	ATTCCAATGACACCACCACA	57.326	20	100	100	GCTGATCTGGATCTGTCCCT	58.577	20	100	100	126	381	506	AATTCCAATGACACCACCACA	58.044	21	100	100	TGCTGATCTGGATCTGTCCCT	60.344	21	97.6	100	128	380	507
PolynSSR_470	AATA	3|AHLA_contig_42985:5760-6171|+	N/A	4|TWXB_1.clean_(paired)_contig_94663:3135-3150|-	0.5	0.33	0.98	AAGAAATAGACGGATAACTATCAAAAGATACAGACAGGGTGAAACTCCTAATTGGTTAAAAGACAAAGCATGGCATGGGTTATGATGTTGCAGCAATCAATATGTCATGAGCAGGGACAGCATCCCATTGTTGAAGTGTGGGAGTATGTGTGGGTCTTAGAATGGCCAAAGACTATTCAAGCATTCCCTCAAAAAATAAT	ATTAAAAATAAAAGCAAACTTACGATCTAAGAATAGTGAGACATGGAGTTGCATGCATGAGCACAGAATATAACAGGCGCTAGCATATAAGGGTATGAAAAGATTTCTGGTTTTTACTGAAACATTATGTTATTAATTCCAAATCATCCTCCAGTCCTATATCTGAACTCAGGCTAGGAGTTAATCATAGGAGAATTTCT	GTCATGAGCAGGGACAGCAT	60.107	20	100	100	TGCTCATGCATGCAACTCCA	60.61	20	100	100	172	303	474	ATGTCATGAGCAGGGACAGC	60.107	20	100	100	TGCTCATGCATGCAACTCCA	60.61	20	100	100	174	301	474	TCATGAGCAGGGACAGCATC	59.82	20	100	100	TGCTCATGCATGCAACTCCA	60.61	20	100	100	171	304	474
PolynSSR_471	AATA	3|AHLA_contig_46595:2175-2586|+	2|SCEM_1.clean_(paired)_contig_63563:2319-2326|-	3|TWXB_1.clean_(paired)_contig_88364:3252-3263|-	0.47	0	0.79	GTTCAATGCAATGGGAAAAAAATGAAATACACGAATGAATAAAGTGCAAATAGACAGCAATTATTCTTATCAAATTTCTTACCTCATCAGGATCTGGAACCTCAAGGGTGGTGCCATGTGGTGCCTTAATTGCTATTAAGGTTTCATTCTATAATAAAGACCAACAATTACTCAGTCAGAATTATGTCTCAACAATAAAT	TCTGAAATGTCTTTCCTTAGAAACACACAAATGGAAGTAGCTCAAATTATACTGCCTAAAAAAGAACCTGAAAACATGGTAGGCCCTTGATATCATCTTCTGTAACATAGAGCCACCTAACAAAACAGAGAGACCAATGAATCAGAACACTATCGCAACCAATTGATTGTGAAATGAGAAAAGCACATCCCACACCTTTG	GGTGCCATGTGGTGCCTTAA	60.898	20	100	100	AGGGCCTACCATGTTTTCAGG	59.994	21	100	100	190	309	498	CTCAAGGGTGGTGCCATGT	59.925	19	100	100	AGGGCCTACCATGTTTTCAGG	59.994	21	100	100	199	300	498	GGTGCCATGTGGTGCCTTAA	60.898	20	100	100	GGGCCTACCATGTTTTCAGGT	60.272	21	100	100	189	309	497
PolynSSR_472	AATA	3|AHLA_contig_49095:47-458|+	N/A	4|TWXB_1.clean_(paired)_contig_174545:391-406|-	0.5	0.33	0.99	AATAAAATAATAGTACAACAGGAGAGTTGATATCTCATTCCTGCTCTCCTCATTTATAAGCTTTAAATTGTATTTGTGATTAATTTATTTATATTTTTAGTAAAAAATTAAGTGGCAACTATATATTAATTTTCAAGATTGGAAAGCAAATCTGTCACTTGCTAAAGTGACTAATTAGTAATATAGAAATATTTCAAAAT	AATGACTTAGATTTATTAATACTAAATTAATTGGGATCTAATTTGGTTCAATTAGGTTTGGTTTAAATGCAAAGAAGACTTTGATTCAACGGTATTGGCCTCAACCTCAAATAAAGAACAATGTGCAAATTGAAGGATGCTCATTGCTTATGATCTAAACACGTTGGATGCAAGGGGGTGCCAAGAGCCCCTTCTTTGAG	TGGAAAGCAAATCTGTCACTTGC	60.244	23	95.7	100	TGAGGTTGAGGCCAATACCG	59.748	20	100	100	182	185	366	TGGAAAGCAAATCTGTCACTTGC	60.244	23	95.7	100	GAGGTTGAGGCCAATACCGT	59.748	20	100	100	181	185	365	GGAAAGCAAATCTGTCACTTGC	58.688	22	95.5	100	TGAGGTTGAGGCCAATACCG	59.748	20	100	100	181	186	366
PolynSSR_473	AATA	3|AHLA_contig_55069:173-584|+	2|SCEM_1.clean_(paired)_contig_126931:303-310|+	N/A	0.5	0.33	0.94	TTTGTTGCTCGTTCTAATATGTATGTTTCATCATTCAAGCACAAAAAAGAGAGATGCCCCCACGGAAACAGTTCCATAGTGATTTTCATGGAACTAAGGTATGTCTCATCTCTATCCGTTGGATTGCCTTAATTTTATAATTTATAGAACAAAAGACATCACTCTTTTGATATAATTTCTAAACTATCCCTTCATTATAT	TCCAAACTTATAAATCTATAGCTAAAAATAAATCACGTCTTTGTTCCGTGGTAACACCACGGAACCGGTTCAATTAGATTATTATTCGAATAAAAATATAGCTTAAGGTAATTTATTTTTACTCTTTTTTAATTTTTCTATTGATACCAATTTAAAAAATATACATTAATAAATAAGATCATGATTCAATAGAGAAAGTG	TCTCTATCCGTTGGATTGCCT	58.601	21	100	85.71	AATTGAACCGGTTCCGTGGT	60.179	20	100	65	179	280	458	TCTCTATCCGTTGGATTGCCT	58.601	21	100	85.71	GAACCGGTTCCGTGGTGTTA	60.25	20	90	100	175	280	454	TCTCTATCCGTTGGATTGCCT	58.601	21	100	85.71	AACCGGTTCCGTGGTGTTAC	60.533	20	N/A	N/A	174	280	453
PolynSSR_474	AATA	3|AHLA_contig_56238:128-539|+	5|SCEM_1.clean_(paired)_contig_122864:965-984|+	N/A	1	0.33	0.67	ATCATGAAGCAACAAAATAAAATATTTAATAAAAATTTAAACCAATATTAGGGAAAATATTTTTAGAAGGTATACAGTGTAGCTGTTTATATAACACACAGCCTTATCTTCCATTTCTTTAATAAATATCTTTCATTTTTCCTCCAGCTAAGTGTAATATTTCTAAATTTTTTAATTTTGTTATAATTTAAGAAACTAGG	ATCTACATGGTCCATTACCTTTTTATATGTTTCTATTTGGGTCATTTAACTTGAAAAAGTTAATATTTGATCCCTTACCTTTAGTTGTGTTACAATTTAGTCACTTGAACATACACCATTAATGGTAATCACACGGGGCATACAACATGACACAATTTTTCTCGGAGCTGGCATATGCCATATGTGCTTGTCGTTAATAG	TTTCCTCCAGCTAAGTGTAA	53.583	20	N/A	N/A	TGGTGTATGTTCAAGTGACT	54.218	20	100	100	193	264	456	TTTTCCTCCAGCTAAGTGTA	53.583	20	N/A	N/A	TGGTGTATGTTCAAGTGACT	54.218	20	100	100	194	263	456	TTCCTCCAGCTAAGTGTAAT	53.336	20	95	100	TGGTGTATGTTCAAGTGACT	54.218	20	100	100	192	265	456
PolynSSR_475	AATA	3|AHLA_contig_56448:119-530|+	3|SCEM_1.clean_(paired)_contig_125222:464-475|+	2|TWXB_1.clean_(paired)_contig_78601:815-822|-	0.47	0	0.98	GTTCATCCAAACTTAGAAAAAATAAAAGTATTAAGACCTTAGACAAAATAAAAGTAGTAAAGCGACGGTGCAATAACTTAGTGGGGCTGAGCAAGTGACAAGATTTTTCTCCAACTGGTTGAAAACTCTTCTTTCAATCCCAATTCTTCAACCATTGACTTATTGTTTCCAAATATATCACGTAAATTGTGTAAACAAAT	GAATTTAATCAAACAAAATCCACGTCTGCCTCAAACCCAATCTACAATTCAAGGTGTGCGCCTAAACTTCGTCCTAGATCCACCGACTAAATTTGAGAGGCTACTAACAAGTGGGACATAAAAATGTGATTAAGATAGTGTCGGTGGTCATCCTATATTATATTCAACCCCTTTGACTTTGGGTTGACCACAGAAAAATA	TTAGTGGGGCTGAGCAAGTG	59.963	20	100	100	ATTGGGTTTGAGGCAGACGT	59.89	20	100	100	176	195	370	GGGCTGAGCAAGTGACAAGA	60.25	20	100	100	AGTTTAGGCGCACACCTTGA	59.892	20	97.5	100	197	201	397	TTAGTGGGGCTGAGCAAGTG	59.963	20	100	100	GGTTTGAGGCAGACGTGGAT	60.322	20	100	100	172	195	366
PolynSSR_476	AATA	3|AHLA_contig_57696:2725-3136|+	N/A	4|TWXB_1.clean_(paired)_contig_32621:539-554|-	0.5	0.33	0.98	CTTAGGTAGAGTGAACCAAATGAAAAAATTTTGAAAAAATTTTGGATACCATATGCTAAAACAATCACCAAGATACACAAAGACCTACAACATAAAAAGTGCTAGAAGCAATTGTAGTTAACCGCGCATGCACATCATAGTTCAATCATCACGGATACTATTTAGAAATTCCATTCTGTCAATCCAAATATCTATCTAGC	AACATTCATATAACATGCTCAACAAACCAATCTTCAACCATTACAAGTTATCACCCAGCTAACAAGACCTTGACACCAAAAAAATTTTCATCAAATAATCCAAAAATTAATTTTAACACAAGGTTTCAAATATATCCGAGTTATGGTCAAGAAGTATAGTTCAATTAAATACAGACAGGATGCAAGCTTTTCCAACTCCC	GTAGTTAACCGCGCATGCAC	60.248	20	N/A	N/A	AGGTCTTGTTAGCTGGGTGA	58.27	20	100	90	169	313	481	CGCGCATGCACATCATAGTT	59.694	20	100	90	AGGTCTTGTTAGCTGGGTGA	58.27	20	100	90	160	322	481	TTGTAGTTAACCGCGCATGC	59.555	20	95	100	AGGTCTTGTTAGCTGGGTGA	58.27	20	100	90	171	311	481
PolynSSR_477	AATA	3|AHLA_contig_60917:408-819|+	2|SCEM_1.clean_(paired)_contig_142089:281-288|-	3|TWXB_1.clean_(paired)_contig_146576:1135-1146|+	0.47	0	0.98	CTCACTAGTTAATTAATGTAAAATTTTATTGATATAAATATAAAGAAAAAATTGTAATTTCACTTGTTGAATATTCCTCATAATATTTAAGGCCCAAAGTTTTACTAAAAATATGCTAATAAAAAAACATTGATGATTATCGTTGAATCAATAATTTTAACCAGACGAATTTTTGATGTAGTGATGAGCTCATTTTTCTT	AATCATAGTAAATTAGTAGCGTTGCAATCTCAAAGTATGACATAATCCACTAATTAATAATTTATTTATAATTAATTAAAAGGCAACAAGTCTTAACAAATTTCCTAATGACTTATCAACAACAATAATAAATTTGAATTTATTAGTCTTCACAATCACACATAATTAAGAAAAATAACACAATACCCCTTTAATTTTTT	Primers not available
PolynSSR_478	AATA	3|AHLA_contig_64010:3819-4230|+	6|SCEM_1.clean_(paired)_contig_97686:2534-2557|+	N/A	1.5	0.33	0.99	AATGTTTTCATCACCATTCTGTCTTCTTAGAAAGATCACAATCAAAGAAACCAAAGAGTAAATCACAAGAAGAACAAGATCAAGAACATCTATCAGTATCCTTTGAGTGCATATGCTATATTCACCATTGTAAATGCGTTAAAGATCACCTGTAAACCAAAATTACAGGAATGAAGCAAAGAAAGTGTAACTAATAAATG	ACCATACCCATGAAGTTCTTCATTGAAACCATTGTATTGATGTGCAAGAAGAGCTTTCTGTCTGACACTTTATTAGTGGAAAAGGCTGGAAAACTGTTGGCTGACCAAAAATATGTTCACTCAGATACTGAACATAATAATTCATGTTATTATAACAAACTCTTTAATCAAAAAGAAAAAGTGCATATTATAATGGCTCT	GCGTTAAAGATCACCTGTAAACCA	59.547	24	94.7	79.17	AGCCAACAGTTTTCCAGCCT	60.106	20	100	100	179	335	513	TGCGTTAAAGATCACCTGTAAACC	59.547	24	94.4	75	AGCCAACAGTTTTCCAGCCT	60.106	20	100	100	180	334	513	GCGTTAAAGATCACCTGTAAACC	58.034	23	94.4	78.26	AGCCAACAGTTTTCCAGCCT	60.106	20	100	100	179	335	513
PolynSSR_479	AATA	3|AHLA_contig_72348:1813-2224|+	2|SCEM_1.clean_(paired)_contig_95369:594-601|-	N/A	0.5	0.33	0.71	CATGCCTTTTGATAGAGTATGACAACCAGAATGTCAATGTTGTGGCATCACAGTTAAACTTGGTATGTTTTAGTGTTTAAAATGTTAAGTCATGCACCAAAAAAGAAGAAGCATACTAATGAAATAGCCAACAGAGATGAGAGCACATGTCTTGATTTGTGGTCACACCAAAAACATAAATGAATAAATAATGAATAAAT	ACGGAGGCACAAAGGAAGATGTTCATGATAAATTCGAACTGTTTCAATTGGGCAGAAAATGGGGAGGACATTAATTTTCGGTTTTGGTCATGTATATCCTGGTCTACTAATACACTAGTACAGGAAGCGGAGGACGTTCAAGTTGCATGGCAAAAAAGGCAAAATCAAGAGCCAAAAGGTCATGGCTAGGGTGATAACAA	AGCCAACAGAGATGAGAGCAC	60.066	21	N/A	N/A	CCTCCCCATTTTCTGCCCAA	60.252	20	100	70	154	325	478	AGCCAACAGAGATGAGAGCA	58.726	20	N/A	N/A	CCTCCCCATTTTCTGCCCAA	60.252	20	100	70	154	325	478	GCCAACAGAGATGAGAGCACA	60.338	21	N/A	N/A	CCTCCCCATTTTCTGCCCAA	60.252	20	100	70	153	326	478
PolynSSR_480	AATA	3|AHLA_contig_75096:416-827|+	N/A	7|TWXB_1.clean_(paired)_contig_51897:550-577|-	2	0.33	0.96	GAATCGTTTTAGATTGAACATACTGCAATTCCATCTGTGCAATTGTAAATTGTGCTATATAGAATTTTCCATGCTTCCTTCATTTTGGGATTTGCTTGGCCATAACGTCTATATGAGTAGCTTTCTAACCATACCTGCATGGTTTGACAACAAAATAATTTGATCCTTCCTACTCAACTGAAGATTGCATTAACGTTAAC	AAAAAATAAGAACAACTGAGAGGATGAGCAAGGTGTTAACATGATAATAAGTGGAGAATGAACTGACAGCCTTTCAAACACATGTACCAGTTACAAAAACAGACATCCTTGAAAGAGAAAATGTTCAGCAGGCTTTCATTTGTCACAAGACATATTGGCAAAGGGAAACCAATTGCGTTTGGTTGGACTGTTTAAAGTAA	GGGATTTGCTTGGCCATAACG	60.202	21	100	100	CACCTTGCTCATCCTCTCAGT	59.446	21	100	100	161	286	446	GGGATTTGCTTGGCCATAACG	60.202	21	100	100	ACACCTTGCTCATCCTCTCAG	59.446	21	100	100	162	286	447	GGGATTTGCTTGGCCATAACG	60.202	21	100	100	ACACCTTGCTCATCCTCTCA	58.351	20	100	100	162	286	447
PolynSSR_481	AATA	3|AHLA_contig_8180:2614-3025|+	2|SCEM_1.clean_(paired)_contig_17046:6223-6230|-	3|TWXB_1.clean_(paired)_contig_30129:344-355|-	0.47	0	0.98	GCAATGAATGAAGCATTCCCTACCTATCTTCTTTGTGCTTTCTTTGTTGCTTTAATTTAAGTTTCTGCAAGGAAAGAAGGCTAAGGACAAGTTCGGCTACATGTTGTGCCATCACAATGGAGTTGAAAAATTTTCTTTAAGGTAGTGTTTGATAGCATGAGAATAGAGAATAATGAATAAGGGGTGAAATTAGGTATCGG	GGGAATAAGCAACTATTATACTTGCACCCTTAGTTTAATATTGAGGGAGAATAATCTTGAAAATAAGGTAACACCACTTTGGGGTGGATTAGTTCTTTTGGAGAATAAGGCCTGTTATTCCAAAAATGAAGAAATAGAATATAGCTTATTTTATTATCCATTATGCTTTGGCTGGTGGCCATTCTATTGAGGAAATGCCT	AGGGGTGAAATTAGGTATCGGA	58.339	22	97.75	100	CACCCCAAAGTGGTGTTACCT	60.134	21	100	100	119	379	497	AGGGGTGAAATTAGGTATCGGA	58.339	22	97.75	100	ACCCCAAAGTGGTGTTACCT	58.772	20	100	100	118	379	496	AGGGGTGAAATTAGGTATCGGA	58.339	22	97.75	100	CACCCCAAAGTGGTGTTACC	58.676	20	100	100	119	379	497
PolynSSR_482	AATA	3|AHLA_contig_84684:1477-1888|+	N/A	4|TWXB_1.clean_(paired)_contig_126451:531-546|+	0.5	0.33	0.97	ACACTAATTGTGCTTGAGATAGTTACCATCCTTGTCTAATTCCTAATTAAATATTTTCACTAATTAGATGACTAAGTCTTTCTGTTTTTTTAATTTCAAAGTCATTTTCAAAATAAATAACATGAAAGTTCCAAAGTTGCAAGTGATAAACAGACATCTTTCTATTTGTGTGGCATGTTGGAATATATGCATTTTTCCGT	AGATGCATAGCATTTGCATGCATTGTTAGAGACAAGGAAGAAATTAATAGCATATAACATGAACACCTGTTTTTGTCAATATATAAAATTGCATGAAGATCTCATACACATATTAAAAACTTACCTCTTGCATTTTGCATGATTTAACAGAACACATTATAAATTAATTATTAACAAAACAAGATTAACCGATTTGTTTG	AGTTCCAAAGTTGCAAGTGA	55.699	20	100	100	CCTTGTCTCTAACAATGCATGCA	59.559	23	100	95.65	123	326	448	AGTTCCAAAGTTGCAAGTGA	55.699	20	100	100	TCCTTGTCTCTAACAATGCATGC	59.309	23	100	91.3	124	326	449	AGTTCCAAAGTTGCAAGTGA	55.699	20	100	100	CCTTGTCTCTAACAATGCATGC	57.975	22	100	95.45	123	326	448
PolynSSR_483	AATA	3|AHLA_contig_86079:986-1397|+	2|SCEM_1.clean_(paired)_contig_131425:351-358|-	N/A	0.5	0.33	0.97	GGCCACATATTCCCACCACCAATGGTAGTGAATTTTTTTAATCAGTAGAGATGACTAGCTGCAAATAGTTAAAACTTAAAAGGTATCAAACAACGACACACCTGATATAGTATTGGCCATAAGTTGGCTGGAAATACTAGCATGGTGAAGTAAATAAAATTGTCATGATTCTTATTATGTACCCTTACACTTTGAAAGTT	ATGACGATGAATAAGGCAAAGTTTCTGGTAGTGAAGTCCTTTAATCACAGGCAATAAAGTTCTTTAATTATACTTAACACACACCCTTCGTTTTCCTGCCTCCACTTCCAATACTTCAACATGCATTTAAATAAAATCACTTGTTATCATTTAACAAAATGAAAGGAAATCGTAATCAGCAGGAAACTCGCCAAATTTCT	CTGGAAATACTAGCATGGTGAAGT	58.568	24	100	100	TGGAGGCAGGAAAACGAAGG	60.251	20	100	90	189	327	515	CTGGAAATACTAGCATGGTGAAGT	58.568	24	100	100	GAGGCAGGAAAACGAAGGGT	60.251	20	100	100	187	327	513	CTGGAAATACTAGCATGGTGAAGT	58.568	24	100	100	GCAGGAAAACGAAGGGTGTG	59.689	20	100	100	184	327	510
PolynSSR_484	AATA	3|AHLA_contig_93646:3574-3985|+	2|SCEM_1.clean_(paired)_contig_102816:449-456|-	3|TWXB_1.clean_(paired)_contig_111563:741-752|-	0.47	0	0.99	AAGTTACGAAGTGCAGGCCCCTTTGGCTGTTCCATTACCATCCAACACCAAACATCTACAGTAGAAGTTGATAAGGGTTTTCCTTCATTTGTTCCTTTAACTGTATCTTCAACCGGAGAATGCAGGCCCTCTTCCTCATCAGAAGACTGCCCATTATCGAAATAGTCACAAATTAAACAGTGCTCATACAGAATGCTACC	TCAAGGGATCTAAAGAAGAATAAAAATATAAACATAATAAACAGCTAAACAAAACAGAATATAATTATCATGCACCTTAGCTTAATTGTCTTAAGAACTCATTGACATTATCAAATAAATCTATTTTATCTGCTCAATTTTGAGCAGATTTAGTTTCTCAATTTGCTTGTCTCTTCCACAAAAGAGCAGATAGAGATAAG	AGGCCCTCTTCCTCATCAGA	59.659	20	100	100	GACAATTAAGCTAAGGTGCATG	55.779	22	100	100	179	323	501	GAATGCAGGCCCTCTTCCTC	60.465	20	100	100	GACAATTAAGCTAAGGTGCATG	55.779	22	100	100	185	317	501	GAGAATGCAGGCCCTCTTCC	60.465	20	100	97.5	GACAATTAAGCTAAGGTGCATG	55.779	22	100	100	187	315	501
PolynSSR_485	AATA	3|AHLA_contig_96795:95-506|+	3|SCEM_1.clean_(paired)_contig_160795:258-269|+	2|TWXB_1.clean_(paired)_contig_26935:366-373|+	0.47	0	0.99	CATCTTAGGTATTTTCATGAGGAAGAGGAAGTTGGTCATTTTTTAGGTAAATTAACAGTATATTTCATCAGTTATTTTTTATCTACATTTAAAAAAAATTTATCGGAAAAAAAAAGACCTATGAGGCAATACGAACGTATGGGGCATTTTGATGGAAAGTATAAACTTTGGGGGACTGTAATTACTTATCAGTATTTATG	AACATAAAAAATCAAATAAAATAGAGAAATGCCCAGCCCCCATTGGCTGCGGACGTGCGGCGTGCTTTTCTGTGAGCCTGATCGAATCTCAGAAAAAGGGTGGGGACCAAGAGAAAGAGGGAGAGAGAGAGAGTCCGGTGGCCCAAGTTTTGTACTTTCCCGGCGCTCTGAGAGAGGTGGAGATGAAGATGGAGATGAAG	ACGAACGTATGGGGCATTTTG	59.529	21	100	100	TCTCTTGGTCCCCACCCTTT	60.403	20	100	100	196	224	419	ACGAACGTATGGGGCATTTTG	59.529	21	100	100	TTCTCTTGGTCCCCACCCTT	60.403	20	100	100	197	224	420	ACGAACGTATGGGGCATTTTG	59.529	21	100	100	TTTCTCTTGGTCCCCACCCT	60.403	20	100	100	198	224	421
PolynSSR_486	AATA	3|AHLA_contig_97750:231-642|+	N/A	2|TWXB_1.clean_(paired)_contig_91597:4-11|-	0.5	0.33	0.62	CTGTTGGAGAGGTTGTAATGACTCTTGCTCCAAAATCAAGAGAACAAGCCTAACAAGATTAATTTTTTCACTTTCCTTTCTATGTTAGAGCTTCAACAATGTTGAAGAGATGAAAACAATGAGCAAACATTTACATATGTATGATAAAATAATAATTTAAAAATCTTAACTGGCAAAAAATATAAAAATACTAAATAAAT	ATAGTTTGAGAAAGAGAGAGAAAAGAGTTTAGAGGATATACTTAATGAAGACCATTTCGAACTAGTTAATAGGGTGGTGAAGATGATCATGTGTTGTTTTGCAAAATCAACAGAGTTCATGAAGCCTTAAAATTTCACTATTTTCTATTTTTGGAAAAGGCCATTGATGTGCTCCATAAATTTCAATACCTATCTTGAAA	Primers not available
PolynSSR_487	AATA	4|AHLA_contig_10548:1216-1631|+	3|SCEM_1.clean_(paired)_contig_1318:2091-2102|+	N/A	0.5	0.33	0.98	AAAACCATATCTATCAACAAGATGGCAGCTAGCTATATATATATGGCGCAAGCACTTGACTAATTCATATACCCACCTAATTAGAATTATTATACATTGTTGTTACTAAAACTTTATTAAATTATAATCTTACCAAATTGAAATGGAAAGAACATTATATAGGGAATAATGAATATTGATTTGAGATGGAAAGGCACTAT	AAAACTTACATGTAAATTAAGAACTTTAATTTATTCTATAATGGAGAGATGGTGACCTTCTTCTCCTCCATAGGCTAATTCATTTTTCTCTTGAATTCCTCAGGCATATTGATTATACTCAAATAATCAAGTTTCATAGCACTATATATATATATATATATACATATGCAAAAGTGATAAATCAGAAATTTATTAAAACA	TGATTTGAGATGGAAAGGCA	54.916	20	100	100	GGAGGAGAAGAAGGTCACCA	58.354	20	100	100	109	376	484	TGATTTGAGATGGAAAGGCA	54.916	20	100	100	TGGAGGAGAAGAAGGTCACC	58.354	20	100	100	110	376	485	GATTTGAGATGGAAAGGCACTA	56.142	22	100	100	TGGAGGAGAAGAAGGTCACCA	60.133	21	100	100	109	377	485
PolynSSR_488	AATA	4|AHLA_contig_114707:53-468|+	5|SCEM_1.clean_(paired)_contig_39334:1643-1662|+	2|TWXB_1.clean_(paired)_contig_49508:651-658|-	1.25	0	0.97	CAAATGGTCCTATTCCACTTTGAGTGGAAAAATCCTCTTTCTCACAAAGTACTTGAGGATCTAGTTCCAATGCACTATCAAATGGTTCAGCCTTTTCCAAGCTTGGCAATTCAAATTCAATCTCAACATCCACCTATTGCAAAACATCAAAACTAGAGTTATTAATCCGATTTTGGTACTTAAACTATGTCGCTTTGTTT	AAATGTGCTCCTTCCATCCCATTATCAATGCGATTTTGGTTATTAAAAAGTTTTACAAAGATTTAGCTTACTTTTTTTCCATATTGCATGATTCTCTCTCCTACTGCTAAAGTTATGTATTTAGTACATGTAGAGAATAATATATTTAAATAGATTAGTAATGTTAAATTTAAAACTTAACATTTATATTAGTTATATAA	TGGTTCAGCCTTTTCCAAGC	58.96	20	100	100	TGGGATGGAAGGAGCACATT	58.998	20	100	100	155	134	288	TGGTTCAGCCTTTTCCAAGC	58.96	20	100	100	AATGGGATGGAAGGAGCACA	58.998	20	100	100	157	134	290	TGGTTCAGCCTTTTCCAAGC	58.96	20	100	100	ATGGGATGGAAGGAGCACAT	58.771	20	100	100	156	134	289
PolynSSR_489	AATA	4|AHLA_contig_135092:2417-2832|+	6|SCEM_1.clean_(paired)_contig_1523:3959-3982|+	5|TWXB_1.clean_(paired)_contig_9267:2349-2368|+	0.82	0	0.98	TGAAGTTTTTCCACTTTTTGAAGATTGCACGATCCTCTTCAGATAACAGTAGATCATCACTGACTTGACCTTTCTCCATTGCACACTCAACCTTCTTTTTCATTCCTTGGTACATCAACTGTGTCACAGTGGAAAGGGAAAACTACACATGAGCTCAAGCACTTGAAACATTGAACAGAAAATAAACATCTAATTTCTCC	AAAGTAAAAGTGAAGGAAAGAAACAATAATTTTGAAGCAGAGAATGCATAATAGTTGATAAAGATATGGTCATAATTGAAGACGCTAATGAAAATAAGTGGCATGCGTTTTATTTAGGAAATAATTTGTCCTTTTCTCTGTTTTAATAAAGAGCTCCGGAGAAACTAAAAATTACACATACAACCACGTAAGATTTGTTT	ACACATGAGCTCAAGCACTTG	59.122	21	100	100	ACGCATGCCACTTATTTTCA	56.318	20	100	100	180	344	523	CACATGAGCTCAAGCACTTGA	58.851	21	100	100	ACGCATGCCACTTATTTTCA	56.318	20	100	100	179	345	523	ACACATGAGCTCAAGCACTT	57.733	20	100	100	ACGCATGCCACTTATTTTCA	56.318	20	100	100	180	344	523
PolynSSR_490	AATA	4|AHLA_contig_135395:322-737|+	N/A	5|TWXB_1.clean_(paired)_contig_54832:678-697|+	0.5	0.33	0.72	TTATATTAAGGCCATTGCATGTCCAATTTTAACATGTAGAACCTAAGTGTTGTTGAGGCCGGCATATTGACTGATTAAAAAGAGCTTTATTTAAATATGCGCTCAATGTTTAAATTAACAAACGTGATATTATTTAGAATTAATAGAGACATAAAACCACTTCAAACGCCATGTTTTATTTGGAGGAGGCGAAATCTAAC	ATTAAAATAAAATGCATTTTGATTTCACATGTGCATTATGATTGTGATGTTCATAGCATTTTGTTGAGGGAGTAGTCAAACTACTATTGATTTTTCAAGGAAAACAGTTGACCAACTTAATCTTTGACCAAATTAAAGTAATATAAAATTTAAAATAATAATTGAAATGGTCTTGGAAACTCAGCCATGCATTGTGGTTG	ACCACTTCAAACGCCATGTT	58.601	20	100	100	TGACTACTCCCTCAACAAAATGC	58.928	23	100	100	139	355	493	AACCACTTCAAACGCCATGT	58.601	20	100	100	TGACTACTCCCTCAACAAAATGC	58.928	23	100	100	140	354	493	ACCACTTCAAACGCCATGTT	58.601	20	100	100	TGACTACTCCCTCAACAAAATGCT	60.202	24	100	100	139	355	493
PolynSSR_491	AATA	4|AHLA_contig_137398:420-835|+	3|SCEM_1.clean_(paired)_contig_54497:940-951|+	N/A	0.5	0.33	0.99	AAAACATACCAAATATGCTGCTCTTTTTTCTTTTATTACTACAATAATCTTAAAATTCAAAAGAAAATAAGACACATTCTGACCCAAAAAAGCATCCAATTATTCATGAAATAAAAGTCACAAACACACAAAAAAATTAAATATCATAATGAAAAACAATAACATCATACTCAAGCACAGCGCCCGGACTAGTCAAACTG	TGAAGCTTTTAATACAGCTATGATTTATCCATTTTTTTAAAAAAAAGTATGAAGCTTTGCAAAGCAACGAGCAAGCCGGAACTTCCCCGGCCACCAACGACGGCGACCTCCCTATCAGTTTCCAACACCGGATTCCTAGAAAACAAATTAAGTAATGGCGCTACCATACATTGAACTCACCGGACGTGAACCCAATATCC	GCCCGGACTAGTCAAACTGA	59.393	20	100	100	GCTTGCTCGTTGCTTTGCAA	60.871	20	100	100	111	381	491	CGCCCGGACTAGTCAAACTG	60.736	20	100	100	GCTTGCTCGTTGCTTTGCAA	60.871	20	100	100	112	380	491	GCCCGGACTAGTCAAACTGA	59.393	20	100	100	AAGTTCCGGCTTGCTCGTT	60.228	19	100	100	119	381	499
PolynSSR_492	AATA	4|AHLA_contig_138882:323-738|+	3|SCEM_1.clean_(paired)_contig_132324:1527-1538|+	3|TWXB_1.clean_(paired)_contig_106387:1037-1048|-	0.47	0	0.98	TAGATTGCTAAAGCTCTTGTGCTCATACGATGATTGTATGGTTGTGGGAGACTTGTTAAAGTTTGTTTTGTTAGGAAAACACATTATTTCACTCAGATTAATAGTAGTAGGTTCACATTTAAATAAGATTTGGTCTATTCAAGATTGTTATGTACTAAAAATGTATGTAGCACCCCCTTCACTAATATTGTTTAATACTC	ATCAAACATTGTAAGTACCTACAATTTCATGTTTTATAAATTCTAACATTCAACCTAGTGCAATGAACCTAACTCCATGAAACTAAAGCCATTATGTGGGAAACTGAAATAAGCATCCATATATTGACTAGCTTATAAGTGTCTAAATACACTAGATTTGAATTGTAATTTTATGTACTTTCATGAATTTTTAGTAAAGC	Primers not available
PolynSSR_493	AATA	4|AHLA_contig_145380:161-576|+	N/A	2|TWXB_1.clean_(paired)_contig_143507:365-372|+	1	0.33	0.93	GCCATTACTATGAACCAAAATGCCCCTTAAGCCTTTACCATATATAATTCTTTTGTAGGAAAAACTAATAACTTTAATAAAAAAGTCAATCAAAAGATATCTCGTTATGTTGATTTCTTGTTTCATTGAAAGTGATCAGTGTCTTGTTTGAATATCTTATCCTCTTATAAGAAGGAATAATAAATAGCAAGAAAAATTGT	AAATAAAGGATAAATCTCAAGATAATTTGGACGTTTCTTCCAAAATGTTAATAAAGGAATTCTTTTGCCATTTGGTTGGTGATGTTGGACCCCCATTAGCATCACCAAGCCACAGAAATTTCCAAGTTGTCTTCTTGACCTAAACCTTACTTTCCAACCCTAATTTGATTTTTTTCCAAAAGTAATGATATGTGAGTAGA	GTGATCAGTGTCTTGTTTGA	53.49	20	100	100	GGTCCAACATCACCAACCAA	58.301	20	100	100	176	291	466	GTGATCAGTGTCTTGTTTGA	53.49	20	100	100	ACATCACCAACCAAATGGCA	58.285	20	100	100	170	291	460	AGTGATCAGTGTCTTGTTTG	53.473	20	100	100	GGTCCAACATCACCAACCAA	58.301	20	100	100	177	290	466
PolynSSR_494	AATA	4|AHLA_contig_154169:619-1034|+	3|SCEM_1.clean_(paired)_contig_72303:1784-1795|-	3|TWXB_1.clean_(paired)_contig_91983:1380-1391|+	0.47	0	0.98	GATAGTGATTAGCAAAAGAAAGATTGATTGTATTGTTGCCCCACTCCAAATGCCAATCCAAATACCTTGTCCTCTCATATGCACTATGAACCCTAAAATAATAGCAAGTGGAGTTCCAACCAAATATAGACTTATAAGGTTTGCATATGCACCAATGTTTTGCCACCCACATCCTCTAGCAATTCCTATCAACAAACAAT	AAAACAATAGAAAGAATAGATATCAAAGCTATCAGACATGTTACATTATTACCTTAGTACTTCAATGAAAGATTGAAGAGATAGTGTTCATCTTATACATGCTAAAACATAATTAAATTGCCATACCTGAGATAATTCCTTGTAAACAGTCCATTATAACTGCAAGGCAAACCAAAGGAGCTAACCGACTGACATGGTCG	TTTTGCCACCCACATCCTCT	59.518	20	100	100	AGGAATTATCTCAGGTATGGCA	56.382	22	100	93.18	199	357	555	GTTTTGCCACCCACATCCTC	59.397	20	100	100	AGGAATTATCTCAGGTATGGCA	56.382	22	100	93.18	200	356	555	TGTTTTGCCACCCACATCCT	60.106	20	100	100	GGAATTATCTCAGGTATGGCAA	55.647	22	100	90.91	200	355	554
PolynSSR_495	AATA	4|AHLA_contig_37316:2024-2439|+	2|SCEM_1.clean_(paired)_contig_47505:3438-3445|+	4|TWXB_1.clean_(paired)_contig_40867:6375-6390|-	0.94	0	0.99	ATACTTAGAGATATGCTGAAATGAGCATCTTTGCAATTACGAACCTTAAGATATCCCAAAAGAAGATCTGGACAACATACAATGAAAGACAAGCAATTGTCTGACAAAGATTAAATGACTCCACATTCCCAAATCTTTTGGCACAAAAAAAATACTCCACAAAAATTTGTGCCTCTAAAAAGTCGATTCAATAAGTGATT	AGTGCAAGAAAATAAAGGCAATTTCAACCTACCAAATATGGTTTCCCTTCAATTGTTCGATTAATGATGATCTTGTGAAAATGGATTCCTAGAACTTCATGCACAAGTGAATATTGAAGTAACCGACTTATGCATGCACGCTTTCTATCCTCGAACTTTATAAACCTAGTGATGTGTCAGCTCAAGGTAAGAAAATAGAT	CCACATTCCCAAATCTTTTGGCA	60.244	23	100	100	GTGCATGAAGTTCTAGGAATCCA	58.483	23	100	100	200	320	519	TCCACATTCCCAAATCTTTTGGC	59.992	23	100	100	TGCATGAAGTTCTAGGAATCCA	57.157	22	100	100	200	319	518	CCACATTCCCAAATCTTTTGGC	58.663	22	100	100	GTGCATGAAGTTCTAGGAATCCA	58.483	23	100	100	200	320	519
PolynSSR_496	AATA	4|AHLA_contig_38597:5797-6212|+	N/A	5|TWXB_1.clean_(paired)_contig_93958:1708-1727|-	0.5	0.33	1	ACTTGACCTGAACCTCCTTCAACTGCTTAATAAAATCAGTTTGTACAATTCTGACATATTTCACCTCATCGACTACCTGTTTCAATAAATGTAAAAATAAATGATTATATTATCCACAAAGGAGTCTGGTCAGTTATTAGAAATGTATGTTGTCTATACTAACTAATTTGTGAAAATAATGACTAAGTCATACTCAAATG	AAGACCAAGCCTGAATAAATATGATAGACAGAACAAATAATATAATAATTCTTAATATGATTAGAAATGCTAAAAAGGAATGTTTATTCCACATTATAGATTCCAATCAAAAAGAACATATTCAGTATGCAAAATGAACCACTGCAAACATAATGCAAAATCCAGACACTGGTATTTTGGTGTGTTATTCCACTGTAAAT	Primers not available
PolynSSR_497	AATA	4|AHLA_contig_55603:849-1264|+	3|SCEM_1.clean_(paired)_contig_84008:1957-1968|-	3|TWXB_1.clean_(paired)_contig_16417:1357-1368|-	0.47	0	0.99	AAACACAAACCAAGTGCATCAGCCAATGAAACATAAATCACAATTCTTGTTTCAGATCACACCTAAAAAAAAAAGAAAAATAAAAATGGAAACGATAATCATAAATAAGAGAAATTTTCTTTGATAAATAAATTGAAGATGATAACTAAGATTGGCGGAATCTCGAAGATAAATTCTCAATCACCTTAACAAAAAAATCC	ATCCAAAGAAAAGCATTTTCATTTTTCAGCACCATCTTTTTTTCTTCTGCTTTACTACAAATAATCTAACCAACAACTACTGTTCCTGATGTTGTAATCCACATACAATGCAATTCTAATATTCCTCATGGGCGATGATGCGCAATTCACATACCATCCTCATAATATTCCTCATCATGATGTTGTAATTCACATTCTGT	AGATTGGCGGAATCTCGAAGA	59.243	21	100	100	TGTGGATTACAACATCAGGAACAG	58.997	24	100	91.67	171	348	518	AGATTGGCGGAATCTCGAAGA	59.243	21	100	100	GTGGATTACAACATCAGGAACAGT	58.996	24	100	87.5	170	348	517	GATTGGCGGAATCTCGAAGA	57.775	20	100	100	TGTGGATTACAACATCAGGAACAG	58.997	24	100	91.67	170	349	518
PolynSSR_498	AATA	4|AHLA_contig_78028:1453-1868|+	N/A	2|TWXB_1.clean_(paired)_contig_171090:1458-1465|+	1	0.33	0.96	GAATTCACATCCATCAATCATGTGATAATATATTTTTGGACCATATATCTATCTGTATATTATTTAACATTTGAAAGTACTGAGGCCATGCATAATTTATCAACATGAGGGTGGTATATATATATCTATATATCAGACAAACAAATATCATAACTAACCAGTAAGTAATTAATGTAGTTGTAAAAACAACATAATATATG	ATCATCATAAACCCAGTAAAATTAAATAATATTTTTACCTCTGCATCATGGTGAGGGAGAGCGCCATGAGACAATAGATAGCAGTGATGATGGTCATGGATAAAAGCAAGCCAAGAGGAATATCTCTGGACGGGTTCTTCGTCTCCTCCGCCATCGTTGCTATGTTATCAAATCCACCATAAGCGAAGTAAACAATGGCG	GAAAGTACTGAGGCCATGCA	57.886	20	100	70	CCTCACCATGATGCAGAGGT	59.455	20	100	100	200	272	471	AAAGTACTGAGGCCATGCAT	57.185	20	100	75	CCCTCACCATGATGCAGAGG	60.179	20	100	100	200	273	472	GAAAGTACTGAGGCCATGCAT	58.352	21	100	71.43	CCTCACCATGATGCAGAGGT	59.455	20	100	100	200	272	471
PolynSSR_499	AATA	4|AHLA_contig_87912:2961-3376|+	N/A	2|TWXB_1.clean_(paired)_contig_44493:3310-3317|+	1	0.33	0.75	TTATCATGTTATTAATAATGTTGGTTAATGAATAATAGTTAATAAAGCCTGTTAGCTTTTGCATTATAAAATGAAAAGGACCTCACAAATCTAGCACCATCATCTTTGTTTTCTTTTTCCCCTGCAACAACAAACACCTCAATAAAGTTCCTTTCTTATTTAACAGCACTTTTTTAATTAAGAAGTATTTAAAATAAATG	CAATAATCTTCCCTATTGTTTTACCTTTATTAAAAAAAAGTAATAAAAATCGGAGAGGGAATAAATGAATTTTAATAATTATTTCCTTTTCATTCAACAAAATATATATATTTTTGAAAAAAAAAAAATCATTTGCACATCCAAATGTAGCTTTAAAAAATTAGGGGCATTCCGAGAATTGAACTCGGGACCTCTCGCAC	CCTGCAACAACAAACACCTC	57.792	20	N/A	N/A	TTCATTTATTCCCTCTCCGA	53.426	20	100	100	165	320	484	CCTGCAACAACAAACACCTC	57.792	20	N/A	N/A	TCATTTATTCCCTCTCCGAT	53.178	20	100	100	164	320	483	TTTCCCCTGCAACAACAAAC	57.318	20	95	100	TTCATTTATTCCCTCTCCGA	53.426	20	100	100	170	315	484
[truncated: 2,232 more rows]
